# Supplementary material for: Radical-polar crossover reaction of glycine derivatives
Source: Royal Society of Chemistry journal article supplement (doi:10.1039/d4cc02939a), 2024-01-01

## Supporting Information

### Radical-polar Crossover Reaction of Glycine Derivatives

Youwan Ye, Xin Zhang, Peng Kong, Yong Yuan, Xiaolong Zhao, Congde Huo\*

Gansu International Scientific and Technological Cooperation Base of Water-Retention Chemical Functional Materials; Key Laboratory of Eco-Environment-Related Polymer Materials Ministry of Education; College of Chemistry and Chemical Engineering, Northwest Normal University, Lanzhou, Gansu 730070, China

E-mail: [huocongde1978@hotmail.com](mailto:huocongde1978@hotmail.com)

### Table of Contents Graphic

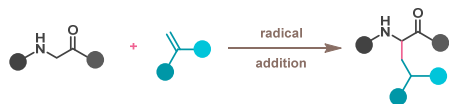

## Table of Contents

|                                                                |             |
|----------------------------------------------------------------|-------------|
| General experimental methods.....                              | (Page S2)   |
| The synthesis of substrates.....                               | (Page S2)   |
| Optimization of reaction conditions.....                       | (Page S2)   |
| General Procedure of Glycine Derivatives A with alkene B.....  | (Page S5)   |
| Scale-up experiment.....                                       | (Page S7)   |
| Radical trapping experiments.....                              | (Page S7)   |
| The isotope labelling experiments with D <sub>2</sub> O.....   | (Page S7)   |
| Trap plausible carbanionic species using CO <sub>2</sub> ..... | (Page S8)   |
| The light on-off experiment.....                               | (Page S8)   |
| Time course experiments.....                                   | (Page S9)   |
| Stern-Volmer luminescence quenching analysis.....              | (Page S10)  |
| Cyclic voltammetry study.....                                  | (Page S11)  |
| Characterization of the products.....                          | (Page S13)  |
| Reference.....                                                 | (Page S42)  |
| NMR spectra of the products.....                               | (Page S34)  |
| X-Ray Diffraction Data of C8 (CCDC 2345482) .....              | (Page S107) |
| HRMS spectra of key intermediates.....                         | (Page S108) |

## General Information

The starting materials, reagents and solvents, purchased from commercial suppliers, were used without further purification. Analytical TLC was performed with silica gel GF254 plates, and the products were visualized by UV detection. Flash chromatography was carried out using silica gel 200 - 300. <sup>1</sup>HNMR (400 MHz or 600 MHz) and <sup>13</sup>CNMR (151 MHz) spectra were measured with CDCl<sub>3</sub> as solvent. All chemical shifts ( $\delta$ ) are reported in ppm and coupling constants ( $J$ ) in Hz. High-resolution mass spectra (HRMS) were performed on Agilent 6520 with an ultra-high resolution quadruple Time-of-Flight (qTOF) detector and recorded under electrospray ionization (ESI) conditions.

## The synthesis of substrates

The synthesis of glycine derivatives **A** used in this work were prepared according to the methods reported in literature.<sup>[1]</sup> The synthesis of 1,1-diarylethylenes **B** used in this work were prepared according to the methods reported in literature.<sup>[2]</sup>

## Optimization of reaction conditions

Table S1: Screening of photocatalysts

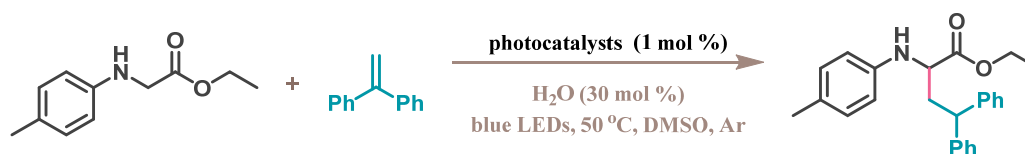

| entry | photocatalyst (1 mol %)                                            | yield (%) <sup>b</sup> |
|-------|--------------------------------------------------------------------|------------------------|
| 1     | -                                                                  | n.d.                   |
| 2     | [Ir(dF(CF <sub>3</sub> )ppy) <sub>2</sub> (dtbbpy)]PF <sub>6</sub> | 72                     |
| 3     | Ru(bpy) <sub>3</sub> Cl <sub>2</sub>                               | 10                     |
| 4     | fac-Ir(bpy) <sub>3</sub>                                           | 5                      |
| 5     | [Ir(dtbbpy)(ppy) <sub>2</sub> ]PF <sub>6</sub>                     | 53                     |
| 6     | 4CzIPN                                                             | 54                     |
| 7     | Mes-Acr-ph <sup>+</sup> BF <sub>4</sub> <sup>-</sup>               | trace                  |

<sup>a</sup> Reaction conditions: ethyl *p*-tolylglycinate (0.1 mmol), 1,1-diphenylethylene (0.4 mmol), photocatalysts (1 mol %), H<sub>2</sub>O (30 mol %), DMSO (0.25 mL), Ar, blue LEDs, 50 °C, 24 h. <sup>b</sup> Isolated yield.

**Table S2: Screening of additive**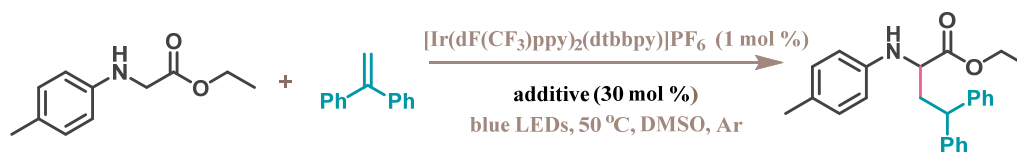

| entry | additive (30 mol %)  | yield (%) <sup>b</sup> |
|-------|----------------------|------------------------|
| 1     | 4-MePhSH             | 67                     |
| 2     | Cyclohexyl mercaptan | 48                     |
| 3     | 1-Dodecanethiol      | 64                     |
| 4     | Perfluorodecanethiol | 52                     |
| 5     | Benzyl mercaptan     | 69                     |
| 6     | Hantzsch ester       | trace                  |
| 7     | AcOH                 | 46                     |
| 8     | TFA                  | 8                      |
| 9     | H <sub>2</sub> O     | 72                     |

<sup>a</sup> Reaction conditions: ethyl *p*-tolylglycinate (0.1 mmol), 1,1-diphenylethylene (0.4 mmol), [Ir(dF(CF<sub>3</sub>)ppy)<sub>2</sub>(dtbbpy)]PF<sub>6</sub> (1 mol %), additive (30 mol %), DMSO (0.25 mL), Ar, blue LEDs, 50 °C, 24 h. <sup>b</sup> Isolated yield.

**Table S3: Screening the loading of additive**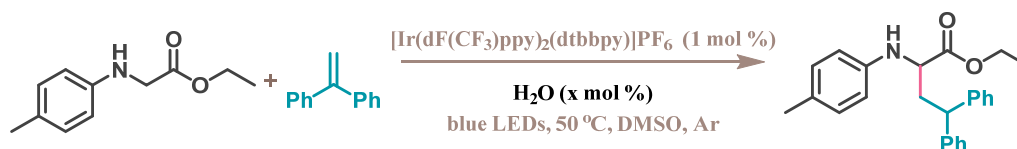

| entry | additive                     | yield (%) <sup>b</sup> |
|-------|------------------------------|------------------------|
| 1     | -                            | 49                     |
| 2     | H <sub>2</sub> O (30 mol %)  | 72                     |
| 3     | H <sub>2</sub> O (50 mol %)  | 71                     |
| 4     | H <sub>2</sub> O (1.0 equiv) | 77                     |
| 5     | H <sub>2</sub> O (2.0 equiv) | 82                     |
| 6     | H <sub>2</sub> O (3.0 equiv) | 63                     |
| 7     | H <sub>2</sub> O (5.0 equiv) | 55                     |
| 8     | H <sub>2</sub> O (8.0 equiv) | 53                     |

<sup>a</sup> Reaction conditions: ethyl *p*-tolylglycinate (0.1 mmol), 1,1-diphenylethylene (0.4 mmol), [Ir(dF(CF<sub>3</sub>)ppy)<sub>2</sub>(dtbbpy)]PF<sub>6</sub> (1 mol %), H<sub>2</sub>O (x mol %), DMSO (0.25 mL), Ar, blue LEDs, 50 °C, 24 h. <sup>b</sup> Isolated yield.

**Table S4: Screening of solvent**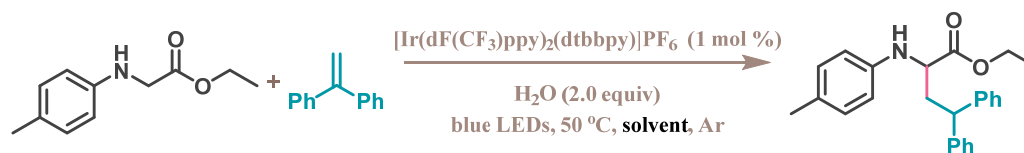

| entry | solvent           | yield (%) <sup>b</sup> |
|-------|-------------------|------------------------|
| 1     | DMSO              | 82                     |
| 2     | DMF               | 39                     |
| 3     | DMA               | 35                     |
| 4     | EtOH              | 10                     |
| 5     | HFIP              | trace                  |
| 6     | DCE               | 45                     |
| 7     | DCM               | 9                      |
| 8     | EA                | 15                     |
| 9     | CHCl <sub>3</sub> | 8                      |
| 10    | MeCN              | 18                     |

<sup>a</sup> Reaction conditions: ethyl *p*-tolylglycinate (0.1 mmol), 1,1-diphenylethylene (0.4 mmol), [Ir(dF(CF<sub>3</sub>)ppy)<sub>2</sub>(dtbbpy)]PF<sub>6</sub> (1 mol %), H<sub>2</sub>O (2.0 equiv), solvent (0.25 mL), Ar, blue LEDs, 50 °C, 24 h. <sup>b</sup> Isolated yield.

**Table S5: Screening the loading of solvent**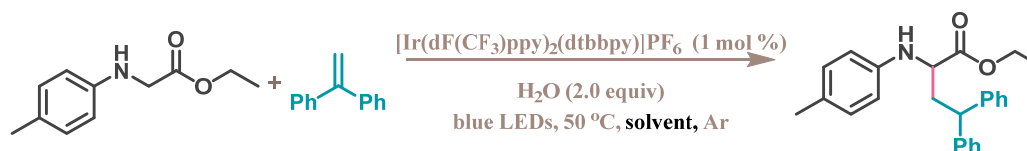

| entry | solvent        | yield (%) <sup>b</sup> |
|-------|----------------|------------------------|
| 1     | DMSO (0.1 mL)  | 26                     |
| 2     | DMSO (0.25 mL) | 82                     |
| 3     | DMSO (0.5 mL)  | 71                     |
| 4     | DMSO (1.0 mL)  | 57                     |
| 5     | DMSO (2.0 mL)  | 20                     |

<sup>a</sup> Reaction conditions: ethyl *p*-tolylglycinate (0.1 mmol), 1,1-diphenylethylene (0.4 mmol), [Ir(dF(CF<sub>3</sub>)ppy)<sub>2</sub>(dtbbpy)]PF<sub>6</sub> (1 mol %), H<sub>2</sub>O (2.0 equiv), solvent (x mL), Ar, blue LEDs, 50 °C, 24 h. <sup>b</sup> Isolated yield.

## General procedure of radical addition of glycine derivatives with alkenes

**General procedure 1:** To a dried Schlenk tube (10 mL) with a magnetic stirring bar were added glycine esters (**A**, 0.2 mmol) and  $[\text{Ir}(\text{dF}(\text{CF}_3)\text{ppy})_2(\text{dtbbpy})]\text{PF}_6$  (1 mol %) successively. Air was then withdrawn and backfilled with argon for 3 times. Subsequently, alkenes (**B**, 0.8 mmol),  $\text{H}_2\text{O}$  (2.0 equiv) and degassed DMSO (0.5 mL) were added under argon atmosphere. Then, the resulting reaction mixture was 50 °C under blue LEDs (30 W) irradiation for 24 hours. The reaction progress was monitored by TLC. After the reaction was completed, the reaction mixture was diluted with ethyl acetate and poured into a separatory funnel, washed with brine 3 times. The combined organic layers were dried over  $\text{Na}_2\text{SO}_4$  and concentrated under reduced pressure after filtration, and the residue was purified by column chromatography to afford the desired compounds **C1-C31** (EA/PE = 1:3 - 1:150).

**General procedure 2:** To a dried Schlenk tube (10 mL) with a magnetic stirring bar were added glycine esters (**A**, 0.2 mmol) and  $[\text{Ir}(\text{dF}(\text{CF}_3)\text{ppy})_2(\text{dtbbpy})]\text{PF}_6$  (1 mol %) successively. Air was then withdrawn and backfilled with argon for 3 times. Subsequently, alkenes (**B**, 0.4 mmol), 2, 4, 6-triisopropylbenzenethiol (30 mol %) and degassed DCE (2 mL) were added under argon atmosphere. Then, the resulting reaction mixture was performed at 50 °C under blue LEDs (30 W) irradiation for 60 hours. The reaction progress was monitored by TLC. After the reaction was completed, the reaction mixture was concentrated under reduced pressure, and the residue was purified by column chromatography to afford the desired compounds **C32 - C46** (EA/PE = 1:20 - 1:200).

**General procedure 3:** To a dried Schlenk tube (10 mL) with a magnetic stirring bar were added glycine esters (**A**, 0.2 mmol) and  $[\text{Ir}(\text{dF}(\text{CF}_3)\text{ppy})_2(\text{dtbbpy})]\text{PF}_6$  (1 mol %) successively. Air was then withdrawn and backfilled with argon for 3 times. Subsequently, alkenes (**B**, 0.8 mmol) and degassed DMSO (0.5 mL) were added under argon atmosphere. Then, the resulting reaction mixture was 50 °C under blue LEDs (30 W) irradiation for 24 hours. The reaction progress was monitored by TLC. After the reaction was completed, the reaction mixture was diluted with ethyl acetate and poured into a separatory funnel, washed with brine 3 times. The combined organic layers were dried over  $\text{Na}_2\text{SO}_4$  and concentrated under reduced pressure after filtration, and the residue was purified by column chromatography to afford the desired compounds **C47**

- **C54** (EA/PE = 1:20 - 1:80).

### **Scale-up experiment**

To a dried Schlenk tube (25 mL) with a magnetic stirring bar were added ethyl p-tolyglycinate (5 mmol),  $[\text{Ir}(\text{dF}(\text{CF}_3)\text{ppy})_2(\text{dtbbpy})]\text{PF}_6$  (1 mol %) successively. Air was then withdrawn and backfilled with argon for 3 times. Subsequently, 1,1-diphenylethylene (20 mmol),  $\text{H}_2\text{O}$  (2.0 equiv) and degassed DMSO (12.5 mL) were added under argon atmosphere. Then, the resulting reaction mixture was 50 °C under blue LEDs (30 W) irradiation for 24 hours. The reaction progress was monitored by TLC. After the reaction was completed, the reaction mixture was diluted with ethyl acetate and poured into a separatory funnel, washed with brine 3 times. The combined organic layers were dried over  $\text{Na}_2\text{SO}_4$  and concentrated under reduced pressure after filtration, and the residue was purified by column chromatography to afford the desired compounds (1.31 g, 70%).

### **Radical trapping experiments**

To a dried Schlenk tube (10 mL) with a magnetic stirring bar were added ethyl p-tolyglycinate (0.1 mmol) and  $[\text{Ir}(\text{dF}(\text{CF}_3)\text{ppy})_2(\text{dtbbpy})]\text{PF}_6$  (1 mol %) successively. Air was then withdrawn and backfilled with argon for 3 times. Subsequently, 1,1-diphenylethylene (0.4 mmol),  $\text{H}_2\text{O}$  (2.0 equiv), TEMPO (2.0 equiv) and degassed DMSO (0.25 mL) were added under argon atmosphere. Then, the resulting reaction mixture was 50 °C under blue LEDs (30 W) irradiation for 1 hours. then reaction mixture was diluted with ethyl acetate and poured into a separatory funnel, washed with brine 3 times. The combined organic layers were dried over  $\text{Na}_2\text{SO}_4$  and concentrated under reduced pressure after filtration, and detected by HRMS analysis of the reaction mixture.

### **The isotope labelling experiments with $\text{D}_2\text{O}$**

To a dried Schlenk tube (10 mL) with a magnetic stirring bar were added ethyl p-tolyglycinate (0.1 mmol) and  $\text{Ir}(\text{dF}(\text{CF}_3)\text{ppy})_2(\text{dtbbpy})\text{PF}_6$  (1 mol %) successively. Air was then withdrawn and backfilled with argon for 3 times. Subsequently, 1,1-diphenylethylene (0.4 mmol),  $\text{D}_2\text{O}$

(2.0 equiv) and DMSO degassed (0.25 mL) were added under argon atmosphere. Then, the resulting reaction mixture was 50 °C under blue LEDs (30 W) irradiation for 24 hours. The reaction progress was monitored by TLC. After the reaction was completed, the reaction mixture was diluted with ethyl acetate and poured into a separatory funnel, washed with brine 3 times. The combined organic layers were dried over Na<sub>2</sub>SO<sub>4</sub> and concentrated under reduced pressure after filtration, and the residue was purified by column chromatography to afford the desired compounds in 58% yield with 26% deuterium incorporation.

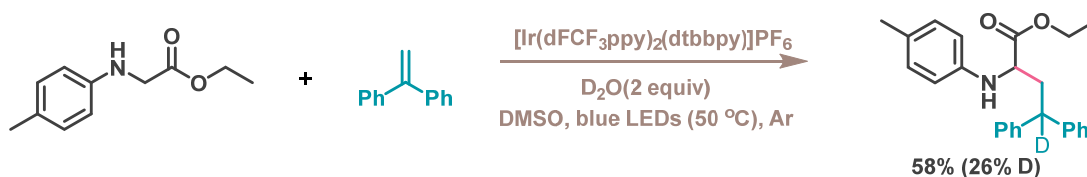

### Trapping plausible carbanionic species with CO<sub>2</sub>

To a dried Schlenk tube (25 mL) with a magnetic stirring bar were added ethyl p-tolyglycinate (0.1 mmol) and [Ir(dF(CF<sub>3</sub>)ppy)<sub>2</sub>(dtbbpy)]PF<sub>6</sub> (1 mol %) successively. Then evacuated and back-filled with CO<sub>2</sub> atmosphere 3 times. Subsequently, 1,1-diphenylethylene (0.4 mmol) and DMSO (0.25 mL) were added under CO<sub>2</sub> atmosphere and the tube was sealed at atmospheric pressure of CO<sub>2</sub> (1 atm). Then, the resulting reaction mixture was performed at 50 °C under blue LEDs (30 W) irradiation for 24 hours. The reaction progress was monitored by TLC. After the reaction was completed, CH<sub>3</sub>I (2 equiv) and Cs<sub>2</sub>CO<sub>3</sub> (2 equiv) was added and stirred at 50 °C for 4 hours, the reaction mixture was diluted with ethyl acetate and poured into a separatory funnel, washed with brine 3 times. The combined organic layers were dried over Na<sub>2</sub>SO<sub>4</sub> and concentrated under reduced pressure after filtration, and the residue was purified by column chromatography to afford the desired compounds (EA/PE = 1:30). <sup>1</sup>H NMR (400 MHz, CDCl<sub>3</sub>) δ 7.32 - 7.21 (m, 10H), 6.95 (d, *J* = 8.4 Hz, 2H), 6.51 (d, *J* = 8.6 Hz, 2H), 4.21 (t, *J* = 5.5 Hz, 1H), 3.96 - 3.76 (m, 2H), 3.58 (s, 3H), 3.22 (dd, *J* = 14.3, 6.0 Hz, 1H), 3.00 (dd, *J* = 14.3, 5.1 Hz, 1H), 2.70 (s, 3H), 2.23 (s, 3H), 1.02 (t, *J* = 7.1 Hz, 3H).



### The light on-off experiment<sup>[3]</sup>

To a dried Schlenk tube (10 mL) with a magnetic stirring bar were added ethyl p-tolyglycinate (0.1 mmol) and Ir(dF(CF<sub>3</sub>)ppy)<sub>2</sub>(dtbpy)PF<sub>6</sub> (1 mol %) successively. Air was then withdrawn and backfilled with argon for 3 times. Subsequently, 1,1-diphenylethylene (0.4 mmol), H<sub>2</sub>O (2.0 equiv) and DMSO (0.25 mL) were added under argon atmosphere. Then, the resulting reaction mixture was performed 50 °C under blue LEDs (30 W) irradiation. The reaction mixture was diluted with ethyl acetate and poured into a separatory funnel, washed with brine 3 times. The combined organic layers were dried over Na<sub>2</sub>SO<sub>4</sub> and concentrated under reduced pressure after filtration. Sixteen identical reactions were carried out simultaneously and yield was determined by <sup>1</sup>H NMR of the crude mixture using 1,3,5-Trimethoxybenzene as internal standard. These experiments with continuous intervals of irradiation and dark periods led to total interruption of the reaction proceed in the absence of light, and reactivity is restored under further light. These results indicated that light is an essential component of the reaction.

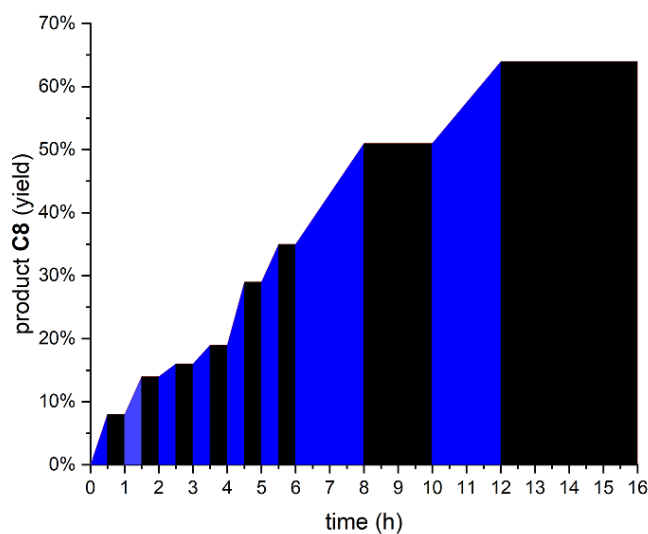

### Time course experiments<sup>[4]</sup>

To a dried Schlenk tube (10 mL) with a magnetic stirring bar were added ethyl p-tolyglycinate (0.1 mmol) and [Ir(dF(CF<sub>3</sub>)ppy)<sub>2</sub>(dtbbpy)]PF<sub>6</sub> (1 mol %) successively. Air was then withdrawn and backfilled with argon for 3 times. Subsequently, 1,1-diphenylethylene (0.4 mmol), H<sub>2</sub>O (2.0 equiv) and DMSO (0.25 mL) were added under argon atmosphere. Then, the resulting

reaction mixture was performed 50 °C under blue LEDs (30 W) irradiation. The reaction mixture was diluted with ethyl acetate and poured into a separatory funnel, washed with brine 3 times. Twelve identical reactions were carried out simultaneously and yield was determined by <sup>1</sup>H NMR of the crude mixture using 1,3,5-trimethylbenzene as internal standard. Reaction times 0.5 h, 1 h, 1.5 h, 2 h, 2.5 h, 3 h, 5 h, 7 h, 9 h, 11 h, 14 h, 17 h were plotted for the increase of product with time and decrease of feedstock ethyl p-tolyglycinate with time.

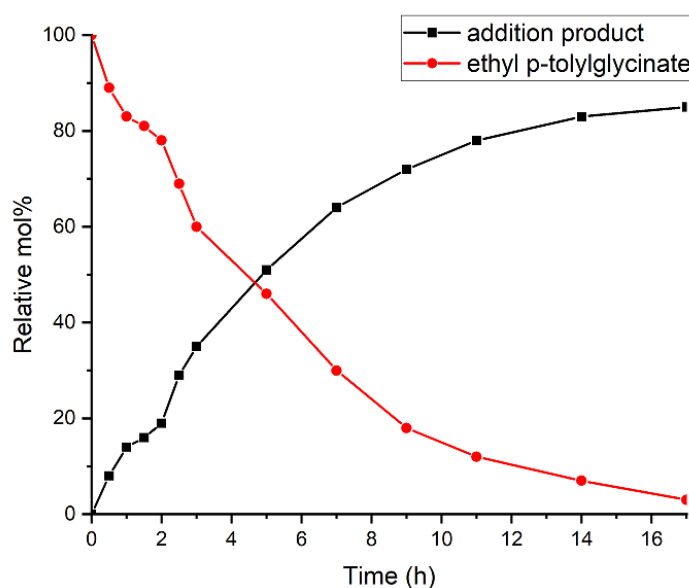

### Stern-Volmer luminescence quenching analysis<sup>[5]</sup>

DMSO was degassed with a stream of argon for 1 h.  $[\text{Ir}(\text{dF}(\text{CF}_3)\text{ppy})_2(\text{dtbbpy})]\text{PF}_6$  (3.4 mg, 15  $\mu\text{mol}$ ) was dissolved in 200 mL DMSO to prepare a  $1.5 \times 10^{-5}$  M solution. 9.5 mL of this solution was added to each of a set of 5 volumetric flasks (10 mL). Subsequently, the solution of quencher ethyl p-tolyglycinate or 1,1-diphenylethylene in DMSO (1.0 mL, 0.0125 M) was added in increasing amounts (0, 50  $\mu\text{L}$ , 100  $\mu\text{L}$ , 150  $\mu\text{L}$  and 200  $\mu\text{L}$ ) to the volumetric flasks and the volume of volumetric flasks were adjusted to 10 mL by adding DMSO. Emission intensities were recorded by using F-4700 Fluorescence Spectrometer. All solutions were excited at 380 nm and the fluorescence emission spectra were recorded. The ratio of the maximum fluorescence emission intensities maximum between samples without and with quencher were plotted against the quencher concentration to generate the Stern-Volmer plots below.

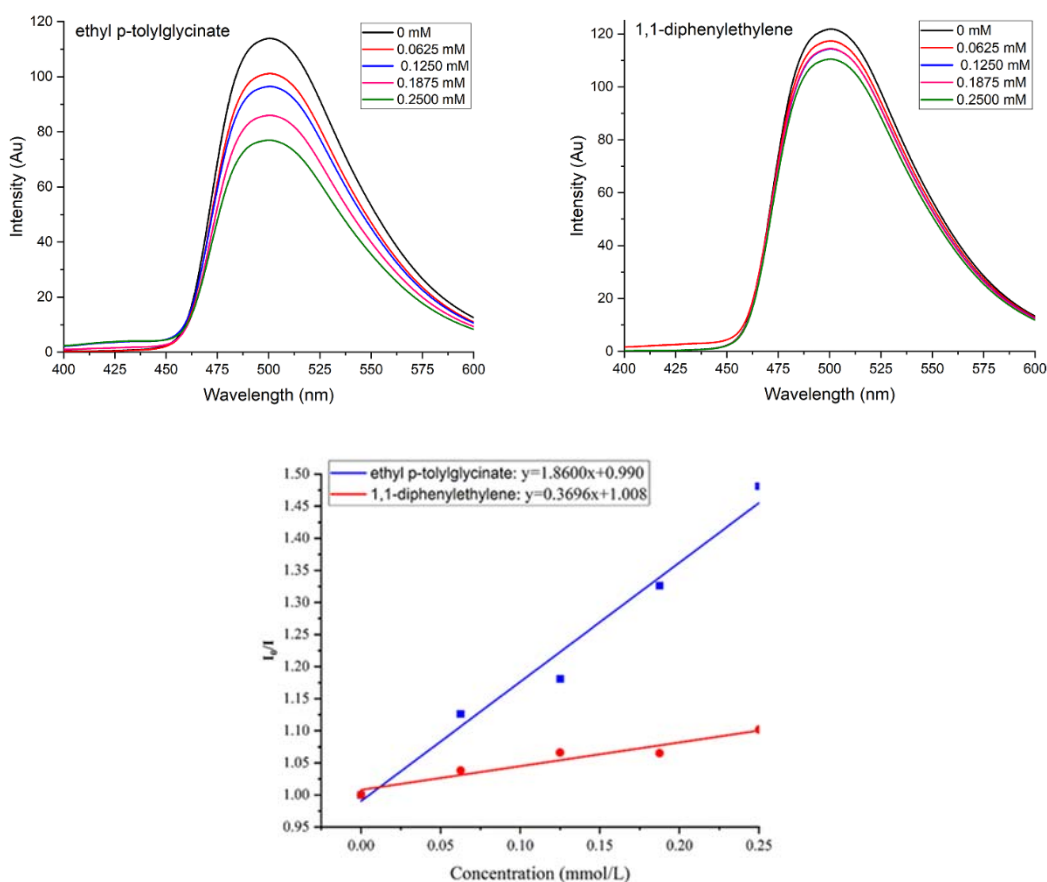

## Cyclic voltammetry study

Cyclic voltammograms were performed on a CH Instruments Electrochemical Workstation model CHI660E at room temperature. Samples were prepared with 0.2 mmol of substrate in 10 mL of 0.1 M tetrabutylammonium hexafluorophosphate in dry, degassed acetonitrile. Measurements employed a glassy carbon working electrode, a Pt counter electrode, and an Ag/AgCl reference electrode, and a scan rate of 100 mV/s. The obtained value was referenced to Ag/AgCl and converted to SCE by subtracting 0.03 V. [6]

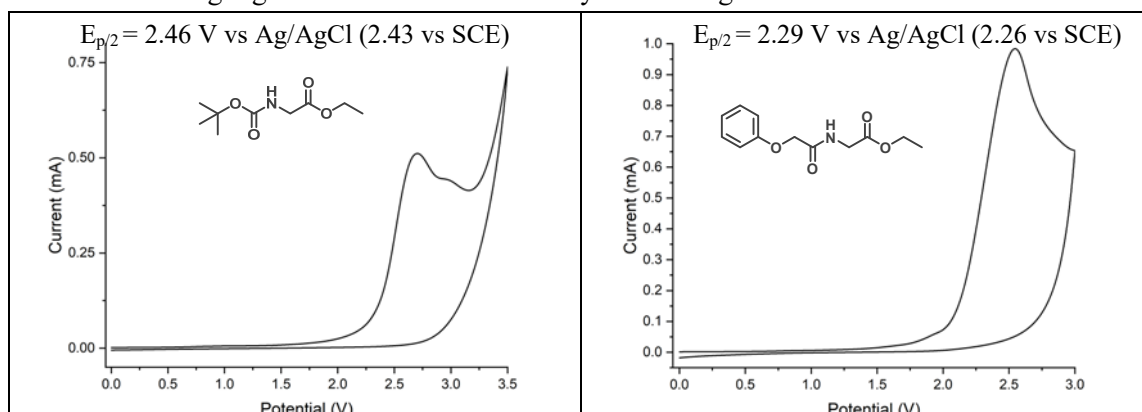

## Characterization of the products

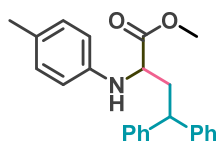

**Methyl 4,4-diphenyl-2-(p-tolylamino)butanoate (C1).** The desired pure product was obtained in 76% yield (54.6 mg) as a white solid. m.p. = 132 - 133 °C.  $^1\text{H}$  NMR (400 MHz,  $\text{CDCl}_3$ )  $\delta$  7.32 - 7.23 (m, 8H), 7.23 - 7.16 (m, 2H), 6.92 (d,  $J$  = 6.7 Hz, 2H), 6.37 (d,  $J$  = 8.5 Hz, 2H), 4.31 - 4.25 (m, 1H), 4.01 - 3.86 (m, 2H), 3.62 (s, 3H), 2.63 - 2.55 (m, 1H), 2.40 - 2.32 (m, 1H), 2.20 (s, 3H).  $^{13}\text{C}$  NMR (151 MHz,  $\text{CDCl}_3$ )  $\delta$  174.7, 144.6, 144.2, 143.4, 129.7, 128.6, 128.5, 128.1, 127.8, 126.5, 126.4, 114.0, 55.6, 52.0, 47.2, 39.1, 20.4. HRMS (ESI-Q-TOF)  $m/z$ :  $[\text{M} + \text{H}]^+$  calcd for  $\text{C}_{24}\text{H}_{26}\text{NO}_2$  360.1958; found 360.1957.

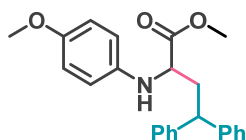

**Methyl 2-((4-methoxyphenyl)amino)-4,4-diphenylbutanoate (C2).** The desired pure product was obtained in 81% yield (64.0 mg) white solid. m.p. = 93 - 95 °C.  $^1\text{H}$  NMR (600 MHz,  $\text{CDCl}_3$ )  $\delta$  7.31 - 7.25 (m, 8H), 7.22 - 7.17 (m, 2H), 6.69 (d,  $J$  = 8.9 Hz, 2H), 6.42 (d,  $J$  = 8.9 Hz, 2H), 4.30 (dd,  $J$  = 9.4, 6.1 Hz, 1H), 3.84 (dd,  $J$  = 9.0, 5.1 Hz, 1H), 3.79 (s, 1H), 3.71 (s, 3H), 3.62 (s, 3H), 2.61 - 2.55 (m, 1H), 2.37 - 2.31 (m, 1H).  $^{13}\text{C}$  NMR (151 MHz,  $\text{CDCl}_3$ )  $\delta$  175.0, 152.9, 144.2, 143.3, 140.9, 128.7, 128.5, 128.1, 127.8, 126.6, 126.4, 115.6, 114.8, 56.5, 55.6, 52.0, 47.2, 39.2. HRMS (ESI-Q-TOF)  $m/z$ :  $[\text{M} + \text{H}]^+$  calcd for  $\text{C}_{24}\text{H}_{26}\text{NO}_3$  376.1907; found 376.1908.

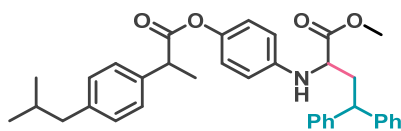

**Methyl 2-((4-((2-(4-isobutylphenyl)propanoyl)oxy)phenyl)amino)-4,4-diphenylbutanoate (C3).** The desired pure product was obtained in 80% yield (87.8mg) as a colorless oil.  $^1\text{H}$  NMR (600 MHz,  $\text{CDCl}_3$ )  $\delta$  7.29 - 7.21 (m, 10H), 7.20 - 7.16 (m, 2H), 7.11 (d,  $J$  = 8.1 Hz, 2H), 6.73 (d,  $J$  = 8.9 Hz, 2H), 6.35 (d,  $J$  = 8.8 Hz, 2H), 4.24 (dd,  $J$  = 9.5, 6.5 Hz, 1H), 4.01 (s, 1H), 3.89 - 3.84 (m, 2H), 3.61 (s, 2H), 2.61 - 2.55 (m, 1H), 2.46 (d,  $J$  = 7.1 Hz, 2H), 2.37 - 2.31 (m, 1H), 1.89 - 1.81 (m, 1H), 1.56 (d,  $J$  = 7.1 Hz, 3H), 0.90 (d,  $J$  = 6.6 Hz, 6H).  $^{13}\text{C}$  NMR (151 MHz,  $\text{CDCl}_3$ )  $\delta$  174.4, 173.6, 144.6, 144.1, 143.2, 143.0, 140.6, 137.4, 129.4, 128.7, 128.5, 128.0,

127.7, 127.2, 126.6, 126.5, 121.9, 114.2, 55.6, 52.1, 47.2, 45.2, 45.0, 39.0, 30.1, 22.4, 18.5.  
HRMS (ESI-Q-TOF)  $m/z$ :  $[M + H]^+$  calcd for  $C_{36}H_{40}NO_4$  550.2952; found 550.2950.

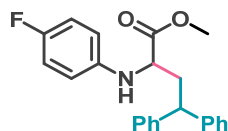

**Methyl 2-((4-fluorophenyl)amino)-4,4-diphenylbutanoate (C4).** The desired pure product was obtained in 71% yield (51.6 mg) a white solid. m.p. = 136 - 138 °C.  $^1H$  NMR (600 MHz,  $CDCl_3$ )  $\delta$  7.23 - 7.16 (m, 8H), 7.15 - 7.09 (m, 2H), 6.75 - 6.70 (m, 2H), 6.31 - 6.26 (m, 2H), 4.19 (dd,  $J = 7.6, 6.9$  Hz, 1H), 3.85 (s, 1H), 4.21 - 4.17 (m, 1H), 3.55 (s, 3H), 2.55 - 2.50 (m, 1H), 2.31 - 2.24 (m, 1H).  $^{13}C$  NMR (151 MHz,  $CDCl_3$ )  $\delta$  174.5, 156.4 (d,  $J = 236.4$  Hz), 144.1, 143.2, 143.2 (d,  $J = 1.9$  Hz), 128.7, 128.6, 128.0, 127.8, 126.6, 126.5, 115.7 (d,  $J = 22.5$  Hz), 115.0 (d,  $J = 7.5$  Hz), 56.1, 52.1, 47.2, 39.0.  $^{19}F$  NMR (376 MHz,  $CDCl_3$ )  $\delta$  -126.45. HRMS (ESI-Q-TOF)  $m/z$ :  $[M + H]^+$  calcd for  $C_{23}H_{23}FNO_2$  364.1707; found 364.1708.

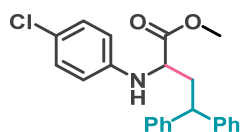

**Methyl 2-((4-chlorophenyl)amino)-4,4-diphenylbutanoate (C5).** The desired pure product was obtained in 66% yield (50.1 mg) a white solid. m.p. = 155 - 157 °C.  $^1H$  NMR (600 MHz,  $CDCl_3$ )  $\delta$  7.33 - 7.20 (m, 10H), 7.06 (d,  $J = 8.8$  Hz, 2H), 6.36 (d,  $J = 8.9$  Hz, 2H), 4.26 (dd,  $J = 9.2, 6.2$  Hz, 1H), 4.08 (s, 1H), 3.93 - 3.88 (m, 1H), 3.66 (s, 3H), 2.66 - 2.60 (m, 1H), 2.42 - 2.35 (m, 1H).  $^{13}C$  NMR (151 MHz,  $CDCl_3$ )  $\delta$  174.2, 145.4, 144.0, 143.1, 129.1, 128.7, 128.6, 128.0, 127.8, 126.7, 126.5, 123.1, 114.9, 55.3, 52.2, 47.2, 38.9. HRMS (ESI-Q-TOF)  $m/z$ :  $[M + H]^+$  calcd for  $C_{23}H_{23}ClNO_2$  380.1412; found 380.1413.

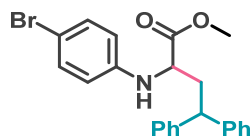

**Methyl 2-((4-bromophenyl)amino)-4,4-diphenylbutanoate (C6).** The desired pure product was obtained in 78% yield (66.6 mg) a white solid. m.p. = 146 - 148 °C.  $^1H$  NMR (600 MHz,  $CDCl_3$ )  $\delta$  7.31 - 7.16 (m, 10H), 7.17 (d,  $J = 8.8$  Hz, 2H), 6.28 (d,  $J = 8.8$  Hz, 2H), 4.23 (dd,  $J = 9.4, 6.4$

Hz, 1H), 4.07 (d,  $J = 9.8$  Hz, 1H), 3.90 - 3.85 (m, 1H), 3.63 (s, 3H), 2.64 - 2.58 (m, 1H), 2.39 - 2.33 (m, 1H).  $^{13}\text{C}$  NMR (151 MHz,  $\text{CDCl}_3$ )  $\delta$  174.2, 145.8, 143.9, 143.1, 131.9, 128.7, 128.6, 128.0, 127.7, 126.7, 126.5, 115.3, 110.2, 55.1, 52.2, 47.2, 38.9. HRMS (ESI-Q-TOF)  $m/z$ :  $[\text{M} + \text{H}]^+$  calcd for  $\text{C}_{23}\text{H}_{23}\text{BrNO}_2$  424.0907; found 424.0906.

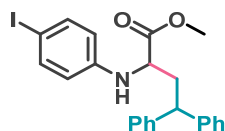

**Methyl 2-((4-iodophenyl)amino)-4,4-diphenylbutanoate (C7).** The desired pure product was obtained in 28% yield (26.3 mg) as yellow solid. m.p. = 157 - 159 °C.  $^1\text{H}$  NMR (600 MHz,  $\text{CDCl}_3$ )  $\delta$  7.35 (d,  $J = 8.8$  Hz, 2H), 7.31 - 7.19 (m, 10H), 6.20 (d,  $J = 8.8$  Hz, 2H), 4.22 (dd,  $J = 9.2, 6.4$  Hz, 1H), 4.07 (s, 1H), 3.91 - 3.86 (m, 1H), 3.65 (s, 3H), 2.64 - 2.58 (m, 1H), 2.40 - 2.33 (m, 1H).  $^{13}\text{C}$  NMR (151 MHz,  $\text{CDCl}_3$ )  $\delta$  174.1, 146.5, 143.9, 143.1, 137.8, 128.7, 128.6, 128.0, 127.7, 126.7, 126.6, 115.9, 79.5, 55.0, 52.2, 47.2, 38.9. HRMS (ESI-Q-TOF)  $m/z$ :  $[\text{M} + \text{H}]^+$  calcd for  $\text{C}_{23}\text{H}_{23}\text{INO}_2$  472.0768; found 472.0766.

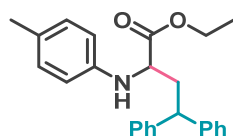

**Ethyl 4,4-diphenyl-2-(p-tolylamino)butanoate (C8).** The desired pure product was obtained in 82% yield (61.2 mg) as a white solid. m.p. = 113 - 115 °C.  $^1\text{H}$  NMR (600 MHz,  $\text{CDCl}_3$ )  $\delta$  7.31 - 7.23 (m, 8H), 7.21 - 7.17 (m, 2H), 6.91 (d,  $J = 8.3$  Hz, 2H), 6.37 (d,  $J = 8.4$  Hz, 2H), 4.28 (dd,  $J = 9.1, 6.5$  Hz, 1H), 4.13 - 4.04 (m, 2H), 3.94 - 3.86 (m, 1H), 2.60 - 2.54 (m, 1H), 2.40 - 2.34 (m, 1H), 2.20 (s, 3H), 1.21 (t,  $J = 7.1$  Hz, 3H).  $^{13}\text{C}$  NMR (151 MHz,  $\text{CDCl}_3$ )  $\delta$  174.2, 144.6, 144.2, 143.4, 129.7, 128.6, 128.5, 128.1, 127.8, 127.7, 126.5, 126.4, 114.1, 61.0, 55.7, 47.3, 39.2, 20.4, 14.2. HRMS (ESI-Q-TOF)  $m/z$ :  $[\text{M} + \text{H}]^+$  calcd for  $\text{C}_{25}\text{H}_{28}\text{NO}_2$  374.2115; found 374.2114.

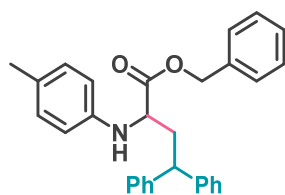

**Benzyl 4,4-diphenyl-2-(p-tolylamino)butanoate (C9).** The desired pure product was obtained in 75% yield (65.2 mg) as a white solid. m.p. = 166 - 168 °C. <sup>1</sup>H NMR (400 MHz, CDCl<sub>3</sub>) δ 7.42 - 7.35 (m, 3H), 7.35 - 7.21 (m, 10H), 6.97 (d, *J* = 8.0 Hz, 2H), 6.44 (d, *J* = 8.0 Hz, 2H), 5.12 (s, 2H), 4.29 (t, *J* = 8.6 Hz, 1H), 4.07 - 3.96 (m, 2H), 2.69 - 2.59 (m, 1H), 2.50 - 2.41 (m, 1H), 2.27 (s, 3H). <sup>13</sup>C NMR (151 MHz, CDCl<sub>3</sub>) δ 174.1, 144.5, 144.0, 143.4, 135.5, 129.7, 128.6, 128.5, 128.5, 128.2, 128.2, 128.0, 127.8, 127.8, 126.5, 126.4, 114.1, 66.7, 55.7, 47.2, 39.1, 20.4. HRMS (ESI-Q-TOF) m/z: [M + H]<sup>+</sup> calcd for C<sub>30</sub>H<sub>30</sub>NO<sub>2</sub> 436.2271; found 436.2269.

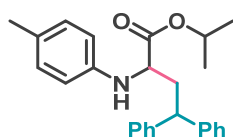

**Isobutyl 4,4-diphenyl-2-(p-tolylamino)butanoate (C10).** The desired pure product was obtained in 75% yield (50.4 mg) as a white solid. m.p. = 121 - 123 °C. <sup>1</sup>H NMR (400 MHz, CDCl<sub>3</sub>) δ 7.32 - 7.23 (m, 8H), 7.23 - 7.17 (m, 2H), 6.90 (d, *J* = 6.4 Hz, 2H), 6.36 (d, *J* = 6.2 Hz, 2H), 5.01 - 4.93 (m, 1H), 4.33 - 4.25 (m, 1H), 3.92 (s, 1H), 3.87 - 3.81 (m, 1H), 2.59 - 2.50 (m, 1H), 2.41 - 2.31 (m, 1H), 2.20 (s, 3H), 1.19 (d, *J* = 6.2 Hz, 6H). <sup>13</sup>C NMR (151 MHz, CDCl<sub>3</sub>) δ 173.8, 144.6, 144.2, 143.5, 129.6, 128.6, 128.5, 128.0, 127.9, 127.7, 126.5, 126.4, 114.1, 68.6, 55.8, 47.3, 39.2, 21.8, 21.7, 20.4. HRMS (ESI-Q-TOF) m/z: [M + H]<sup>+</sup> calcd for C<sub>26</sub>H<sub>30</sub>NO<sub>2</sub> 388.2271; found 388.2272.

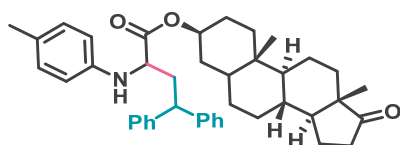

**(3S,8R,9S,10S,13S,14S)-10,13-dimethyl-17-oxohexadecahydro-1H-cyclopenta[a]phenanthren-3-yl 4,4-diphenyl-2-(p-tolylamino)butanoate (C11).** The desired pure product was obtained in 64% yield (78.7 mg) as a colorless oil. <sup>1</sup>H NMR (400 MHz, CDCl<sub>3</sub>) δ 7.33 - 7.23 (m, 8H), 7.23 - 7.17 (m, 2H), 6.90 (d, *J* = 8.0 Hz, 2H), 6.36 (d, *J* = 8.3 Hz, 2H), 4.71 - 4.61 (m, 1H), 4.32 - 4.25 (m, 1H), 3.91 (s, 1H), 3.83 (s, 1H), 2.58 - 2.49 (m, 1H), 2.48 - 2.31 (m, 2H), 2.20 (s, 3H), 2.12 - 2.00 (m, 1H), 1.97 - 1.87 (m, 1H), 1.83 - 1.69 (m, 4H), 1.67 - 1.42 (m, 6H), 1.38 - 1.16 (m, 6H), 1.05 - 0.91 (m, 2H), 0.85 (d, *J* = 4.4 Hz, 6H), 0.74 - 0.65 (m, 1H). <sup>13</sup>C NMR (151 MHz, CDCl<sub>3</sub>) δ 221.1, 173.8, 173.8, 144.6, 144.6, 144.2, 144.2, 143.5, 143.5, 129.6, 128.6, 128.5, 128.1, 128.0, 127.9, 127.7, 127.7, 127.7, 126.5, 126.4, 114.1, 114.1,

74.3, 55.8, 54.2, 51.3, 47.7, 47.3, 44.6, 44.6, 39.3, 36.6, 36.6, 35.8, 35.6, 35.0, 33.8, 33.8, 31.5, 30.8, 30.7, 28.2, 28.2, 27.4, 27.3, 21.7, 20.4, 20.4, 13.8, 12.2. HRMS (ESI-Q-TOF)  $[M + H]^+$  calcd for  $C_{42}H_{52}NO_3$  618.3942; found 618.3940.

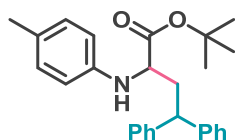

**Neopentyl 4,4-diphenyl-2-(p-tolylamino)butanoate (C12).** The desired pure product was obtained in 72% yield (57.7 mg) as a white solid. m.p. = 147 - 149 °C.  $^1H$  NMR (600 MHz,  $CDCl_3$ )  $\delta$  7.35 - 7.26 (m, 8H), 7.25 - 7.19 (m, 2H), 6.92 (d,  $J$  = 8.3 Hz, 2H), 6.36 (d,  $J$  = 8.5 Hz, 2H), 4.34 - 4.27 (m, 1H), 3.89 (s, 1H), 3.78 (d,  $J$  = 7.0 Hz, 1H), 2.58 - 2.52 (m, 1H), 2.38 - 2.30 (m, 1H), 2.22 (s, 3H), 1.43 (s, 9H).  $^{13}C$  NMR (151 MHz,  $CDCl_3$ )  $\delta$  173.5, 144.8, 144.3, 143.6, 129.6, 128.6, 128.5, 128.1, 127.9, 127.5, 126.5, 126.4, 114.1, 81.5, 56.2, 47.4, 39.4, 28.0, 20.4. HRMS (ESI-Q-TOF) m/z:  $[M + H]^+$  calcd for  $C_{27}H_{32}NO_2$  402.2428; found 402.2427.

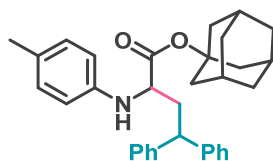

**(3s,5s,7s)-adamantan-1-yl 4,4-diphenyl-2-(p-tolylamino)butanoate (C13).** The desired pure product was obtained in 60% yield (57.5 mg) as a colorless oil.  $^1H$  NMR (400 MHz,  $CDCl_3$ )  $\delta$  7.34 - 7.24 (m, 8H), 7.23 - 7.17 (m, 2H), 6.90 (d,  $J$  = 8.3 Hz, 2H), 6.33 (d,  $J$  = 8.4 Hz, 2H), 4.34 - 4.25 (m, 1H), 3.91 (s, 1H), 3.80 - 3.73 (m, 1H), 2.57 - 2.49 (m, 1H), 2.38 - 2.28 (m, 1H), 2.20 (s, 3H), 2.14 (s, 3H), 2.07 (s, 6H), 1.64 (s, 6H).  $^{13}C$  NMR (151 MHz,  $CDCl_3$ )  $\delta$  173.2, 144.8, 144.3, 143.6, 129.6, 128.6, 128.5, 128.1, 127.9, 127.4, 126.4, 126.4, 114.1, 81.6, 56.2, 47.4, 41.3, 39.5, 36.1, 30.8, 20.4. HRMS (ESI-Q-TOF) m/z:  $[M + H]^+$  calcd for  $C_{33}H_{38}NO_2$  480.2897; found 480.2896.

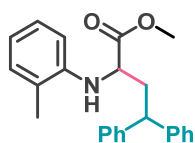

**Methyl 4,4-diphenyl-2-(o-tolylamino)butanoate (C14).** The desired pure product was obtained in 75% yield (53.9 mg) as a colorless oil.  $^1H$  NMR (400 MHz,  $CDCl_3$ )  $\delta$  7.32 - 7.22 (m, 8H),



7.22 - 7.16 (m, 2H), 7.03 (d,  $J = 7.3$  Hz, 1H), 6.99 - 6.94 (m, 1H), 6.68 - 6.63 (m, 1H), 6.24 (d,  $J = 8.0$  Hz, 1H), 4.31 - 4.21 (m, 1H), 4.03 (dd,  $J = 8.1, 5.3$  Hz, 1H), 3.63 (s, 3H), 2.70 - 2.61 (m, 1H), 2.51 - 2.43 (m, 1H), 2.13 (s, 3H).  $^{13}\text{C}$  NMR (151 MHz,  $\text{CDCl}_3$ )  $\delta$  174.7, 144.8, 144.2, 143.5, 130.3, 128.7, 128.6, 128.0, 127.8, 127.0, 126.6, 126.5, 122.9, 118.1, 110.7, 55.2, 52.1, 47.4, 39.2, 17.4. HRMS (ESI-Q-TOF)  $m/z$ :  $[\text{M} + \text{H}]^+$  calcd for  $\text{C}_{24}\text{H}_{26}\text{NO}_2$  360.1958; found 360.1957.

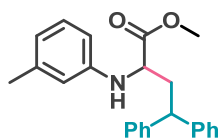

**Methyl 4,4-diphenyl-2-(*m*-tolylamino)butanoate (C15).** The desired pure product was obtained in 78% yield (56.1 mg) as a colorless oil.  $^1\text{H}$  NMR (400 MHz,  $\text{CDCl}_3$ )  $\delta$  7.33 - 7.23 (m, 8H), 7.23 - 7.17 (m, 2H) 7.02 - 6.96 (m, 1H), 6.54 (d,  $J = 7.4$  Hz, 1H), 6.28 - 6.23 (m, 2H), 4.27 (dd,  $J = 9.3, 6.4$  Hz, 1H), 4.05 - 3.90 (m, 2H), 3.64 (s, 3H), 2.64 - 2.55 (m, 1H), 2.41 - 2.33 (m, 1H), 2.20 (s, 3H).  $^{13}\text{C}$  NMR (151 MHz,  $\text{CDCl}_3$ )  $\delta$  174.6, 146.9, 144.2, 143.3, 139.0, 129.1, 128.6, 128.5, 128.1, 127.8, 126.5, 126.4, 119.5, 114.6, 110.9, 55.1, 52.1, 47.2, 39.2, 21.5. HRMS (ESI-Q-TOF)  $m/z$ :  $[\text{M} + \text{H}]^+$  calcd for  $\text{C}_{24}\text{H}_{26}\text{NO}_2$  360.1958; found 360.1959.

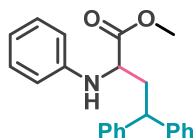

**Methyl 4,4-diphenyl-2-(phenylamino)butanoate (C16).** The desired pure product was obtained in 58% yield (40.0 mg) as a white solid. m.p. = 125- 127 °C.  $^1\text{H}$  NMR (600 MHz,  $\text{CDCl}_3$ )  $\delta$  7.32 - 7.23 (m, 8H), 7.22 - 7.16 (m, 2H), 7.14 - 7.07 (m, 2H), 6.74 - 6.68 (m, 1H), 6.45 (d,  $J = 7.6$  Hz, 2H), 4.30 - 4.23 (m, 1H), 4.05 (s, 1H), 3.95 (s, 1H), 3.63 (s, 3H) 2.65 - 2.57 (m, 1H), 2.42 - 2.36 (m, 1H).  $^{13}\text{C}$  NMR (151 MHz,  $\text{CDCl}_3$ )  $\delta$  174.5, 146.8, 144.1, 143.3, 129.2, 128.7, 128.6, 128.0, 127.8, 126.6, 126.5, 118.5, 113.8, 55.2, 52.1, 47.2, 39.1. HRMS (ESI-Q-TOF)  $m/z$ :  $[\text{M} + \text{H}]^+$  calcd for  $\text{C}_{23}\text{H}_{24}\text{NO}_2$  346.1802; found 346.1804.

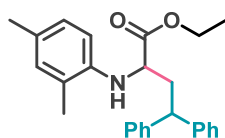

**methyl 2-((2,4-dimethylphenyl)amino)-4,4-diphenylbutanoate (C17).** The desired pure product was obtained in 62% yield (48.1 mg) as a white solid. m.p. = 102- 104 °C. <sup>1</sup>H NMR (400 MHz, CDCl<sub>3</sub>) δ 7.36 - 7.23 (m, 8H), 7.23 - 7.16 (m, 2H), 6.85 (d, *J* = 5.3 Hz, 1H), 6.26 (s, 1H), 6.21 (d, *J* = 7.6 Hz, 1H), 4.33 - 4.25 (m, 1H), 4.13 - 4.03 (m, 2H), 3.91 - 3.83 (m, 1H), 2.64 - 2.50 (m, 1H), 2.41 - 2.26 (m, 1H), 2.11 (s, 6H), 1.22 (t, *J* = 7.0 Hz, 3H). <sup>13</sup>C NMR (151 MHz, CDCl<sub>3</sub>) δ 174.3, 145.0, 144.3, 143.5, 137.3, 130.2, 128.6, 128.5, 128.2, 128.1, 127.8, 126.5, 126.4, 115.8, 111.4, 61.0, 55.6, 47.2, 39.3, 19.9, 18.7, 14.2. HRMS (ESI-Q-TOF) *m/z*: [M + H]<sup>+</sup> calcd for C<sub>26</sub>H<sub>30</sub>NO<sub>2</sub> 388.2271; found 388.2272.

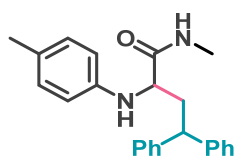

***N*-methyl-4,4-diphenyl-2-(*p*-tolylamino)butanamide (C18).** The desired pure product was obtained in 58% yield (41.6 mg) as a white solid. m.p. = 193- 195 °C. <sup>1</sup>H NMR (400 MHz, CDCl<sub>3</sub>) δ 7.35 - 7.11 (m, 10H), 6.94 (d, *J* = 8.0 Hz, 2H), 6.76 (s, 1H), 6.27 (d, *J* = 8.0 Hz, 2H), 4.16 - 4.03 (m, 1H), 3.78 (s, 1H), 3.63 (dd, *J* = 9.3, 3.9 Hz, 1H), 2.89 - 2.79 (m, 1H), 2.76 (d, *J* = 4.9 Hz, 3H), 2.45 - 2.33 (m, 1H), 2.23 (s, 3H). <sup>13</sup>C NMR (151 MHz, CDCl<sub>3</sub>) δ 174.0, 144.3, 144.1, 143.8, 129.8, 128.8, 128.7, 128.4, 127.8, 127.8, 126.6, 126.54, 113.7, 59.1, 48.7, 39.1, 26.0, 20.4. HRMS (ESI-Q-TOF) *m/z*: [M + H]<sup>+</sup> calcd for C<sub>24</sub>H<sub>27</sub>N<sub>2</sub>O 359.2118; found 359.2118.

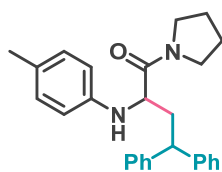

**4,4-diphenyl-1-(pyrrolidin-1-yl)-2-(*p*-tolylamino)butan-1-one (C19).** The desired pure product was obtained in 74% yield (58.9 mg) as a white solid. m.p. = 129- 131 °C. <sup>1</sup>H NMR (400 MHz, CDCl<sub>3</sub>) δ 7.34 - 7.25 (m, 8H), 7.23 - 7.11 (m, 2H), 6.92 (d, *J* = 8.4 Hz, 2H), 6.40 (d, *J* = 8.4 Hz, 2H), 4.33 - 4.26 (m, 1H), 4.22 (s, 1H), 3.94 - 3.87 (m, 1H), 3.45 - 3.30 (m, 2H), 3.10 - 3.03 (m, 1H), 2.92 - 2.84 (m, 1H), 2.43 - 2.33 (m, 2H), 2.21 (s, 3H), 1.81 - 1.69 (m, 4H). <sup>13</sup>C NMR (151 MHz, CDCl<sub>3</sub>) δ 171.8, 145.2, 144.2, 144.2, 129.7, 128.5, 128.5, 128.2, 127.7, 127.6, 126.5, 126.3, 114.5, 54.3, 47.3, 45.7, 45.6, 39.0, 25.9, 24.0, 20.3. HRMS (ESI-Q-TOF) *m/z*: [M + H]<sup>+</sup> calcd for C<sub>27</sub>H<sub>31</sub>N<sub>2</sub>O 399.2431; found 399.2432.

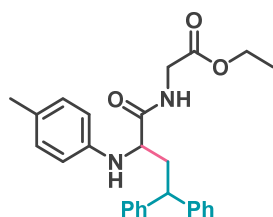

***Ethyl (4,4-diphenyl-2-(p-tolylamino)butanoyl)glycinate (C20)***. The desired pure product was obtained in 43% yield (40.1 mg) as a white solid. m.p. = 121- 123 °C. <sup>1</sup>H NMR (600 MHz, CDCl<sub>3</sub>) 7.29 - 7.24 (m, 4H), 7.24 - 7.14 6.93 (m, 6H), (d, *J* = 8.6 Hz, 2H), 6.30 (d, *J* = 8.5 Hz, 2H), 4.18 - 4.13 (m, 3H), 4.05 (dd, *J* = 18.2, 6.3 Hz, 1H), 3.84 (dd, *J* = 18.1, 5.0 Hz, 1H), 3.71 (s, 1H), 3.68 (d, *J* = 5.5 Hz, 1H), 2.84 - 2.77 (m, 1H), 2.47 - 2.37 (m, 1H), 2.22 (s, 3H), 1.23 (t, *J* = 7.1 Hz, 3H). <sup>13</sup>C NMR (151 MHz, CDCl<sub>3</sub>) δ 173.9, 169.6, 144.2, 144.1, 143.6, 129.7, 128.7, 128.6, 128.2, 127.8, 127.7, 126.5, 113.7, 61.3, 58.7, 48.3, 41.0, 39.0, 20.3, 14.0. HRMS (ESI-Q-TOF) m/z: [M + H]<sup>+</sup> calcd for C<sub>27</sub>H<sub>31</sub>N<sub>2</sub>O<sub>3</sub> 431.2329; found 431.2329.

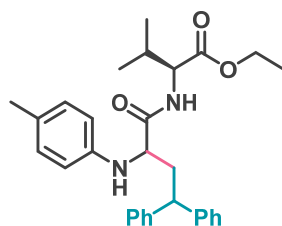

***Ethyl (4,4-diphenyl-2-(p-tolylamino)butanoyl)-L-valinate (C21)***. The desired pure product was obtained in 44% yield (41.4 mg, dr = 1.2:1) as a white solid. m.p. = 149-151 °C. <sup>1</sup>H NMR (600 MHz, CDCl<sub>3</sub>) δ 7.37 - 7.13 (m, 10H), 6.92 (d, *J* = 8.8 Hz, 2H), 6.31 (dd, *J* = 23.2, 8.3 Hz, 2H), 4.51 - 4.46 (m, 1H), 4.22 - 4.13 (m, 2H), 4.09 (q, *J* = 7.2 Hz, 1H), 3.74 - 3.48 (m, 2H), 2.86 - 2.75 (m, 1H), 2.47 - 2.36 (m, 1H), 2.21 (s, 3H), 2.17 - 2.04 (m, 1H), 1.20 (m, 3H), 0.87 (dd, *J* = 32.9, 6.8 Hz, 3H), 0.75 (dd, *J* = 65.0, 6.8 Hz, 3H). <sup>13</sup>C NMR (151 MHz, CDCl<sub>3</sub>) δ 173.6, 173.4, 171.8, 171.3, 144.3, 144.2, 144.1, 144.0, 143.6, 143.5, 129.7, 129.6, 128.8, 128.7, 128.7, 128.3, 128.2, 127.9, 127.8, 127.8, 127.7, 126.6, 126.5, 126.5, 114.2, 113.7, 61.2, 61.1, 59.1, 59.0, 57.1, 56.8, 48.4, 48.4, 39.2, 39.1, 31.1, 31.1, 20.4, 20.4, 19.0, 17.7, 17.4, 14.2, 14.0. HRMS (ESI-Q-TOF) m/z: [M + H]<sup>+</sup> calcd for C<sub>30</sub>H<sub>37</sub>N<sub>2</sub>O<sub>3</sub> 473.2799; found 473.2798.

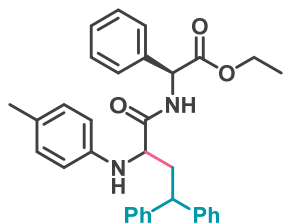

***Ethyl (2S)-2-(4,4-diphenyl-2-(p-tolylamino)butanamido)-2-phenylacetate (C22)***. The desired pure product was obtained in 45% yield (45.5mg, dr = 1:1) as a white solid. m.p. = 180 -182 °C. <sup>1</sup>H NMR (400 MHz, CDCl<sub>3</sub>) δ 7.61 (dd, *J* = 77.2, 7.6 Hz, 1H), 7.38 - 7.10 (m, 14H), 6.92 (dd, *J* = 22.0, 8.0 Hz, 2H), 6.30 (dd, *J* = 43.2, 8.4 Hz, 2H), 5.54 - 5.46 (m, 1H), 4.25 - 4.03 (m, 3H), 3.73 - 3.61 (m, 2H), 2.84 - 2.69 (m, 1H), 2.49 - 2.33 (m, 1H), 2.23 (d, *J* = 5.1 Hz, 3H), 1.21 - 1.11 (m, 3H). <sup>13</sup>C NMR (151 MHz, CDCl<sub>3</sub>) δ 173.11, 173.06, 170.6, 170.3, 144.14, 144.08, 143.58, 143.56, 136.42, 136.36, 129.69, 129.65, 128.9, 128.73, 128.69, 128.6, 128.44, 128.36, 128.3, 127.9, 127.84, 127.75, 127.2, 126.6, 126.5, 114.2, 114.0, 61.8, 61.7, 58.87, 58.86, 56.5, 56.3, 48.4, 48.3, 39.2, 38.9, 20.41, 20.37, 14.0, 13.9. HRMS (ESI-Q-TOF) *m/z*: [M + H]<sup>+</sup> calcd for C<sub>33</sub>H<sub>35</sub>N<sub>2</sub>O<sub>3</sub> 507.2642; found 507.2643.

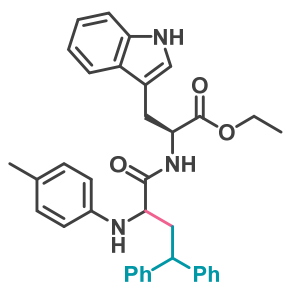

***Ethyl (4,4-diphenyl-2-(p-tolylamino)butanoyl)-L-tryptophanate (C23)***. The desired pure product was obtained in 67% yield (74.9 mg, dr = 1.1:1) as a yellow oil. <sup>1</sup>H NMR (600 MHz, CDCl<sub>3</sub>) δ 7.97 (d, *J* = 117.2 Hz, 1H), 7.45 (dd, *J* = 72.1, 7.9 Hz, 1H), 7.31 - 7.23 (m, 3H), 7.23 - 7.13 (m, 7H), 7.13 - 7.09 (m, 1H), 7.09 - 6.97 (m, 1H), 6.91 - 6.87 (m, 2H), 6.62 (d, *J* = 238.6 Hz, 1H), 6.22 - 6.17 (m, 2H), 4.92 - 4.85 (m, 1H), 4.15 - 4.02 (m, 3H), 3.66 - 3.42 (m, 2H), 3.34 - 3.26 (m, 1H), 3.24 - 3.10 (m, 1H), 2.77 - 2.59 (m, 1H), 2.23 (d, *J* = 21.7 Hz, 3H), 2.35 - 2.10 (m, 1H), 1.21 - 1.03 (m, 3H). <sup>13</sup>C NMR (151 MHz, CDCl<sub>3</sub>) δ 173.3, 171.8, 171.5, 144.23, 144.17, 144.1, 144.0, 143.6, 143.5, 136.0, 129.6, 129.5, 128.7, 128.59, 128.56, 128.0, 127.9, 127.8, 127.7, 127.7, 127.3, 126.5, 126.4, 123.0, 122.7, 122.1, 122.0, 119.51, 119.47, 118.54, 118.47, 114.0, 113.5, 111.3, 111.0, 110.10, 110.08, 109.5, 61.4, 61.3, 58.7, 58.6, 52.9, 52.04,

52.02, 48.3, 48.2, 39.0, 38.7, 27.5, 27.4, 20.39, 20.35, 14.0, 13.9. HRMS (ESI-Q-TOF)  $m/z$ :  $[M + H]^+$  calcd for  $C_{36}H_{38}N_3O_3$  560.2908; found 560.2908.

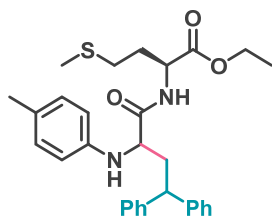

**Ethyl (4,4-diphenyl-2-(p-tolylamino)butanoyl)-L-methioninate (C24).** The desired pure product was obtained in 43% yield (43.4 mg, dr = 1.3:1) as a white solid. m.p. = 102 -104 °C.  $^1H$  NMR (600 MHz,  $CDCl_3$ )  $\delta$  7.30 - 7.14 (m, 10H), 6.93 (d,  $J$  = 8.0 Hz, 2H), 6.31 (dd,  $J$  = 34.4, 8.5 Hz, 2H), 4.70 - 4.58 (m, 1H), 4.17 (q,  $J$  = 7.2 Hz, 2H), 4.11 (q,  $J$  = 7.1 Hz, 1H), 3.81 - 3.56 (m, 2H), 2.83 - 2.75 (m, 1H), 2.44 - 2.38 (m, 2H), 2.28 - 2.24 (m, 1H), 2.21 (d,  $J$  = 2.4 Hz, 3H), 2.16 - 2.04 (m, 1H), 1.96 (d,  $J$  = 65.0 Hz, 3H), 1.95 - 1.80 (m, 1H), 1.28 - 1.14 (m, 3H).  $^{13}C$  NMR (151 MHz,  $CDCl_3$ )  $\delta$  173.6, 173.4, 171.7, 171.3, 144.2, 144.1, 144.0, 143.9, 143.51, 143.49, 129.7, 129.6, 128.73, 128.70, 128.6, 128.3, 128.2, 127.84, 127.81, 127.72, 127.69, 126.6, 126.5, 114.1, 113.5, 61.53, 61.46, 58.8, 58.7, 51.5, 51.1, 48.4, 48.3, 39.1, 38.9, 31.51, 31.46, 30.0, 29.7, 20.4, 20.3, 15.4, 15.2, 14.1, 14.0. HRMS (ESI-Q-TOF)  $m/z$ :  $[M + H]^+$  calcd for  $C_{30}H_{37}N_2O_3S$  505.2519; found 505.2518.

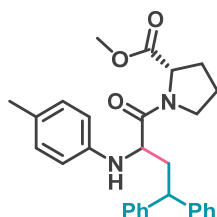

**Methyl (4,4-diphenyl-2-(p-tolylamino)butanoyl)-L-prolinate (C25).** The desired pure product was obtained in 56% yield (51.1 mg, dr = 6:1) as a yellow oil.  $^1H$  NMR (600 MHz,  $CDCl_3$ )  $\delta$  7.32 - 7.23 (m, 8H), 7.22 - 7.16 (m, 2H), 6.94 (d,  $J$  = 8.1 Hz, 2H), 6.44 - 6.27 (m, 2H), 4.38 (dd,  $J$  = 8.1, 2.7 Hz, 1H), 4.24 (t,  $J$  = 7.9 Hz, 1H), 4.05 (s, 1H), 3.97 - 3.88 (m, 1H), 3.54 (d,  $J$  = 17.8 Hz, 3H), 3.36 - 3.25 (m, 1H), 3.00 - 2.93 (m, 1H), 2.49 - 2.35 (m, 2H), 2.22 (s, 3H), 2.14 - 1.98 (m, 2H), 1.96 - 1.85 (m, 2H), 1.85 - 1.74 (m, 1H).  $^{13}C$  NMR (151 MHz,  $CDCl_3$ )  $\delta$  172.3, 172.0, 144.8, 144.2, 144.0, 129.8, 129.6, 128.53, 128.49, 128.1, 127.8, 126.47, 126.45, 114.3, 59.0,

54.2, 52.0, 47.4, 46.1, 38.6, 28.9, 24.6, 20.4. HRMS (ESI-Q-TOF) m/z:  $[M + H]^+$  calcd for  $C_{29}H_{33}N_2O_3$  457.2486; found 457.2486.

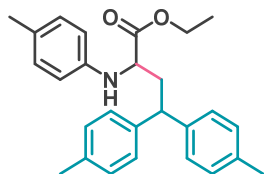

**Ethyl 4,4-di-p-tolyl-2-(p-tolylamino)butanoate (C26).** The desired pure product was obtained in 37% yield (29.7 mg) as a white solid. m.p. = 107 -109 °C.  $^1H$  NMR (400 MHz,  $CDCl_3$ )  $\delta$  7.18 - 7.02 (m, 8H), 6.91 (d,  $J$  = 8.0 Hz, 2H), 6.38 (d,  $J$  = 8.2 Hz, 2H), 4.23 - 4.17 (m, 1H), 4.09 (q,  $J$  = 7.1 Hz, 1H), 3.98 - 3.83 (m, 2H), 2.57 - 2.48 (m, 1H), 2.38 - 2.31 (m, 1H), 2.30 (s, 6H), 2.21 (s, 3H), 1.21 (t,  $J$  = 7.1 Hz, 3H).  $^{13}C$  NMR (151 MHz,  $CDCl_3$ )  $\delta$  174.4, 144.5, 141.5, 140.7, 135.9, 135.8, 129.7, 129.3, 129.2, 127.8, 127.7, 127.6, 114.1, 61.0, 55.7, 46.5, 39.3, 21.0, 21.0, 20.4, 14.2. HRMS (ESI-Q-TOF) m/z:  $[M + H]^+$  calcd for  $C_{27}H_{32}NO_2$  402.2428; found 402.2427.

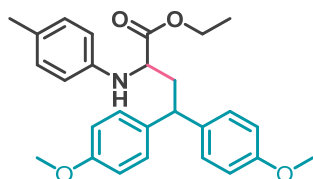

**Ethyl 4,4-bis(4-methoxyphenyl)-2-(p-tolylamino)butanoate (C27).** The desired pure product was obtained in 32% yield (27.7 mg) as a white solid. m.p. = 82 -84 °C.  $^1H$  NMR (400 MHz,  $CDCl_3$ )  $\delta$  7.11 - 7.04 (m, 4H), 6.84 (d,  $J$  = 7.9 Hz, 2H), 6.75 (d,  $J$  = 7.6 Hz, 4H), 6.31 (d,  $J$  = 7.2 Hz, 2H), 4.14 - 4.08 (m, 1H), 4.02 (q,  $J$  = 7.2 Hz, 1H), 3.81 - 3.76 (m, 1H), 3.69 (s, 6H), 2.46 - 2.37 (m, 1H), 2.26 - 2.12 (m, 1H), 2.13 (s, 3H), 1.13 (t,  $J$  = 7.1 Hz, 3H).  $^{13}C$  NMR (151 MHz,  $CDCl_3$ )  $\delta$  174.4, 158.1, 158.0, 144.7, 136.8, 135.9, 129.7, 128.9, 128.6, 127.7, 114.1, 114.0, 113.9, 61.0, 55.7, 55.2, 55.2, 45.7, 39.6, 20.4, 14.2. HRMS (ESI-Q-TOF) m/z:  $[M + H]^+$  calcd for  $C_{27}H_{32}NO_4$  434.2326; found 434.2325.

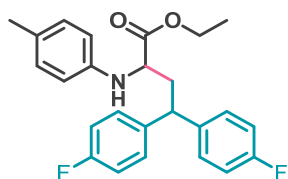

**Ethyl 4,4-bis(4-fluorophenyl)-2-(p-tolylamino)butanoate (C28).** The desired pure product was obtained in 65% yield (40.9 mg) as a white solid. m.p. = 93 -95 °C. <sup>1</sup>H NMR (400 MHz, CDCl<sub>3</sub>) δ 7.22 - 7.16 (m, 4H), 7.03 - 6.90 (m, 6H), 6.38 (d, *J* = 7.9 Hz, 2H), 4.28 (dd, *J* = 9.0, 6.0 Hz, 1H), 4.14 - 4.02 (m, 2H), 3.92 (s, 1H), 3.83 - 3.79 (m, 1H), 2.55 - 2.45 (m, 1H), 2.35 - 2.26 (m, 1H), 2.21 (s, 3H), 1.21 (t, *J* = 7.1 Hz, 3H). <sup>13</sup>C NMR (151 MHz, CDCl<sub>3</sub>) δ 174.1, 161.6 (d, *J* = 245.1 Hz), 161.5 (d, *J* = 245.1 Hz), 144.5, 139.8 (d, *J* = 3.3 Hz), 139.0 (d, *J* = 3.4 Hz), 129.8, 129.4 (d, *J* = 7.9 Hz), 129.2 (d, *J* = 7.6 Hz), 128.0, 115.5 (d, *J* = 22.4 Hz), 115.4 (d, *J* = 21.4 Hz), 114.1, 61.1, 55.5, 45.7, 39.4, 20.4, 14.2. <sup>19</sup>F NMR (376 MHz, CDCl<sub>3</sub>) δ -116.22, -116.40. HRMS (ESI-Q-TOF) *m/z*: [M + H]<sup>+</sup> calcd for C<sub>25</sub>H<sub>26</sub>F<sub>2</sub>NO<sub>2</sub> 410.1926; found 410.1928.

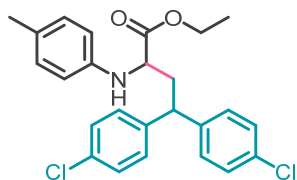

**Ethyl 4,4-bis(4-chlorophenyl)-2-(p-tolylamino)butanoate (C29).** The desired pure product was obtained in 59% yield (52.0 mg) as a white solid. m.p. = 114 - 116 °C. <sup>1</sup>H NMR (400 MHz, CDCl<sub>3</sub>) δ 7.28 - 7.21 (m, 4H), 7.19 - 7.12 (m, 4H), 6.93 (d, *J* = 8.0 Hz, 2H), 6.39 (d, *J* = 8.3 Hz, 2H), 4.26 (dd, *J* = 9.4, 6.0 Hz, 1H), 4.15 - 4.04 (m, 2H), 3.94 (s, 1H), 3.82 (dd, *J* = 8.8, 5.0 Hz, 1H), 2.55 - 2.45 (m, 1H), 2.34 - 2.25 (m, 1H), 2.21 (s, 3H), 1.20 (t, *J* = 7.1 Hz, 3H). <sup>13</sup>C NMR (151 MHz, CDCl<sub>3</sub>) δ 173.9, 144.4, 142.2, 141.4, 132.5, 132.4, 129.8, 129.3, 129.1, 128.9, 128.7, 128.1, 114.1, 61.2, 55.4, 45.9, 38.9, 20.4, 14.2. HRMS (ESI-Q-TOF) *m/z*: [M + H]<sup>+</sup> calcd for C<sub>25</sub>H<sub>26</sub>Cl<sub>2</sub>NO<sub>2</sub> 442.1335; found 442.1335.

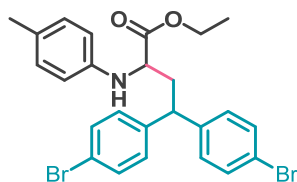

**Ethyl 4,4-bis(4-bromophenyl)-2-(p-tolylamino)butanoate (C30).** The desired pure product was obtained in 45% yield (47.8mg) as a colorless oil. <sup>1</sup>H NMR (400 MHz, CDCl<sub>3</sub>) δ 7.42 (d, *J* = 8.2 Hz, 4H), 7.13 - 7.06 (m, 4H), 6.94 (d, *J* = 8.0 Hz, 2H), 6.39 (d, *J* = 8.0 Hz, 2H), 4.24 (dd, *J* = 9.5, 6.2 Hz, 1H), 4.15 - 4.04 (m, 2H), 3.92 (s, 1H), 3.82 (dd, *J* = 8.8, 5.2 Hz, 1H), 2.54 - 2.45 (m, 1H), 2.33 - 2.25 (m, 1H), 2.22 (s, 3H), 1.21 (t, *J* = 7.2 Hz, 3H). <sup>13</sup>C NMR (151 MHz,

CDCl<sub>3</sub>)  $\delta$  173.9, 144.4, 142.6, 141.9, 131.9, 131.7, 129.8, 129.8, 129.5, 128.1, 120.7, 120.5, 114.2, 61.2, 55.4, 46.1, 38.8, 20.4, 14.2. HRMS (ESI-Q-TOF)  $m/z$ : [M + H]<sup>+</sup> calcd for C<sub>25</sub>H<sub>26</sub>Br<sub>2</sub>NO<sub>2</sub> 530.0324; found 530.0325.

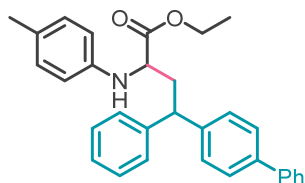

**Ethyl 4-([1,1'-biphenyl]-4-yl)-4-phenyl-2-(p-tolylamino)butanoate (C31).** The desired pure product was obtained in 52% yield (46.7 mg, dr = 6.1:1) as a colorless oil. <sup>1</sup>H NMR (400 MHz, CDCl<sub>3</sub>)  $\delta$  7.61 - 7.53 (m, 4H), 7.46 - 7.41 (m, 2H), 7.38 - 7.31 (m, 7H), 7.27 - 7.20 (m, 1H), 6.94 (d,  $J$  = 8.0 Hz, 2H), 6.42 (dd,  $J$  = 8.5, 2.6 Hz, 2H), 4.36 (dd,  $J$  = 9.1, 6.5 Hz, 1H), 4.12 - 4.07 (m, 2H), 3.98 - 3.92 (m, 2H), 2.68 - 2.59 (m, 1H), 2.48 - 2.36 (m, 1H), 2.23 (s, 3H), 1.24 (t,  $J$  = 7.1 Hz, 3H). <sup>13</sup>C NMR (151 MHz, CDCl<sub>3</sub>)  $\delta$  174.2, 144.6, 144.6, 144.1, 143.4, 143.3, 142.6, 140.8, 140.8, 139.4, 139.3, 129.7, 128.7, 128.7, 128.6, 128.5, 128.2, 128.1, 127.9, 127.8, 127.8, 127.3, 127.3, 127.1, 127.0, 127.0, 126.6, 126.5, 114.1, 114.1, 61.0, 55.70, 55.66, 47.0, 46.9, 39.2, 39.2, 20.4, 14.2. HRMS (ESI-Q-TOF)  $m/z$ : [M + H]<sup>+</sup> calcd for C<sub>31</sub>H<sub>32</sub>NO<sub>2</sub> 450.2428; found 450.2429.

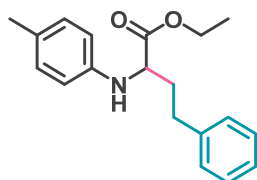

**Ethyl 4-phenyl-2-(p-tolylamino)butanoate (C32).** The desired pure product was obtained in 50% yield (29.7 mg) as a colorless oil. <sup>1</sup>H NMR (600 MHz, CDCl<sub>3</sub>)  $\delta$  7.30 - 7.27 (m, 2H), 7.22 - 7.17 (m, 3H), 6.97 (d,  $J$  = 8.0 Hz, 2H), 6.52 (d,  $J$  = 8.5 Hz, 2H), 4.16 (q,  $J$  = 7.2 Hz, 2H), 4.05 - 4.01 (m, 2H), 2.76 (t,  $J$  = 7.7 Hz, 2H), 2.23 (s, 3H), 2.19 - 2.11 (m, 1H), 2.08 - 1.99 (m, 1H), 1.24 (t,  $J$  = 7.1 Hz, 3H). <sup>13</sup>C NMR (151 MHz, CDCl<sub>3</sub>)  $\delta$  174.1, 144.6, 141.0, 129.88, 128.5, 128.5, 127.6, 126.1, 113.8, 61.0, 56.5, 34.7, 31.8, 20.4, 14.3. HRMS (ESI-Q-TOF)  $m/z$ : [M + H]<sup>+</sup> calcd for C<sub>19</sub>H<sub>24</sub>NO<sub>2</sub> 298.1802; found 298.1803.



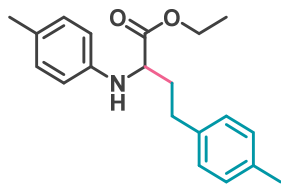

**Ethyl 4-(p-tolyl)-2-(p-tolylamino)butanoate (C33).** The desired pure product was obtained in 32% yield (19.9 mg) as a colorless oil.  $^1\text{H}$  NMR (600 MHz,  $\text{CDCl}_3$ )  $\delta$  7.11 - 7.05 (m, 4H), 6.97 (d,  $J = 8.1$  Hz, 2H), 6.52 (d,  $J = 8.5$  Hz, 2H), 4.15 (q,  $J = 7.1$  Hz, 2H), 4.02 (t,  $J = 5.7$  Hz, 1H), 2.75 - 2.69 (m, 2H), 2.32 (s, 3H), 2.22 (s, 3H), 2.16 - 2.08 (m, 1H), 2.05 - 1.97 (m, 1H), 1.24 (t,  $J = 7.1$  Hz, 3H).  $^{13}\text{C}$  NMR (151 MHz,  $\text{CDCl}_3$ )  $\delta$  174.2, 144.6, 137.9, 135.6, 129.8, 129.1, 128.4, 127.6, 113.8, 61.0, 56.5, 34.8, 31.4, 21.0, 20.4, 14.3. HRMS (ESI-Q-TOF)  $m/z$ :  $[\text{M} + \text{H}]^+$  calcd for  $\text{C}_{20}\text{H}_{26}\text{NO}_2$  312.1958; found 312.1958.

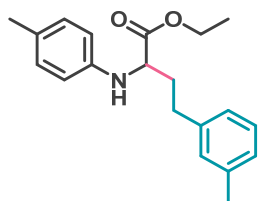

**Ethyl 4-(m-tolyl)-2-(p-tolylamino)butanoate (C34).** The desired pure product was obtained in 40% yield (24.8 mg) as a colorless oil.  $^1\text{H}$  NMR (400 MHz,  $\text{CDCl}_3$ )  $\delta$  7.21 - 7.14 (m, 1H), 7.03 - 6.94 (m, 5H), 6.52 (d,  $J = 8.4$  Hz, 2H), 4.16 (q,  $J = 7.2$  Hz, 2H), 4.02 (s, 2H), 2.72 (t,  $J = 7.9$  Hz, 2H), 2.32 (s, 3H), 2.23 (s, 3H), 2.17 - 2.10 (m, 1H), 2.08 - 1.97 (m, 1H), 1.24 (t,  $J = 7.2$  Hz, 3H).  $^{13}\text{C}$  NMR (151 MHz,  $\text{CDCl}_3$ )  $\delta$  174.2, 144.6, 140.9, 138.0, 129.8, 129.3, 128.4, 127.6, 126.8, 125.5, 113.8, 61.0, 56.6, 34.7, 31.8, 21.4, 20.4, 14.3. HRMS (ESI-Q-TOF)  $m/z$ :  $[\text{M} + \text{H}]^+$  calcd for  $\text{C}_{20}\text{H}_{26}\text{NO}_2$  312.1958; found 312.1960.

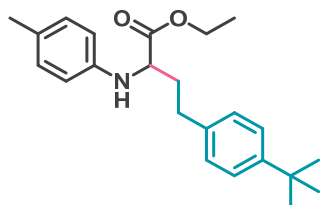

**Ethyl 4-(4-(tert-butyl)phenyl)-2-(p-tolylamino)butanoate (C35).** The desired pure product was obtained in 38% yield (26.8 mg) as a colorless oil.  $^1\text{H}$  NMR (400 MHz,  $\text{CDCl}_3$ )  $\delta$  7.31 (d,  $J = 8.2$  Hz, 2H), 7.12 (d,  $J = 7.9$  Hz, 2H), 6.97 (d,  $J = 7.9$  Hz, 2H), 6.51 (d,  $J = 8.4$  Hz, 2H), 4.15 (q,  $J = 7.1$  Hz, 2H), 4.08 - 3.97 (m, 2H), 2.73 (t,  $J = 7.9$  Hz, 2H), 2.22 (s, 3H), 2.19 - 2.11 (m, 1H), 2.08 - 1.98 (m, 1H), 1.31 (s, 9H), 1.24 (t,  $J = 7.1$  Hz, 3H).  $^{13}\text{C}$  NMR (151 MHz,  $\text{CDCl}_3$ )  $\delta$

174.2, 148.9, 144.6, 137.9, 129.8, 128.1, 127.5, 125.3, 113.8, 61.0, 56.6, 34.6, 34.4, 31.4, 31.3, 20.4, 14.2. HRMS (ESI-Q-TOF)  $m/z$ :  $[M + H]^+$  calcd for  $C_{23}H_{32}NO_2$  354.2428; found 354.2428.

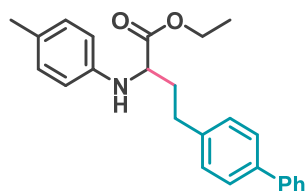

**Ethyl 4-([1,1'-biphenyl]-4-yl)-2-(p-tolylamino)butanoate (C36).** The desired pure product was obtained in 35% yield (26.1 mg) as a colorless oil.  $^1H$  NMR (600 MHz,  $CDCl_3$ )  $\delta$  7.58 (d,  $J = 8.3$  Hz, 2H), 7.52 (d,  $J = 8.3$  Hz, 2H), 7.45 - 7.41 (m, 2H), 7.35 - 7.31 (m, 1H), 7.26 (d,  $J = 8.4$  Hz, 2H), 6.98 (d,  $J = 8.0$  Hz, 2H), 6.53 (d,  $J = 8.4$  Hz, 2H), 4.17 (q,  $J = 7.1$  Hz, 2H), 4.08 - 4.03 (m, 2H), 2.81 (t,  $J = 7.9$  Hz, 2H), 2.23 (s, 3H), 2.20 - 2.16 (m, 1H), 2.11 - 2.02 (m, 1H), 1.25 (t,  $J = 7.2$  Hz, 3H).  $^{13}C$  NMR (151 MHz,  $CDCl_3$ )  $\delta$  174.1, 144.6, 141.0, 140.1, 139.1, 129.8, 128.9, 128.7, 127.7, 127.2, 127.1, 127.0, 113.8, 61.1, 56.5, 34.7, 31.4, 20.4, 14.3. HRMS (ESI-Q-TOF)  $m/z$ :  $[M + H]^+$  calcd for  $C_{25}H_{28}NO_2$  374.2115; found 374.2113.

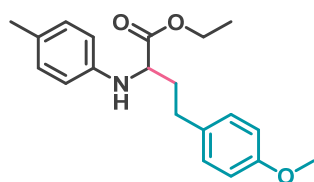

**Ethyl 4-(4-methoxyphenyl)-2-(p-tolylamino)butanoate (C37).** The desired pure product was obtained in 29% yield (19.0 mg) as a colorless oil.  $^1H$  NMR (400 MHz,  $CDCl_3$ )  $\delta$  7.10 (d,  $J = 8.6$  Hz, 2H), 6.97 (d,  $J = 7.8$  Hz, 2H), 6.83 (d,  $J = 8.6$  Hz, 2H), 6.52 (d,  $J = 8.4$  Hz, 2H), 4.15 (q,  $J = 7.1$  Hz, 2H), 4.03 - 3.98 (m, 2H), 3.79 (s, 3H), 2.71 (t,  $J = 7.7$  Hz, 2H), 2.23 (s, 3H), 2.16 - 2.06 (m, 1H), 2.05 - 1.94 (m, 1H), 1.24 (t,  $J = 7.2$  Hz, 3H).  $^{13}C$  NMR (151 MHz,  $CDCl_3$ )  $\delta$  174.2, 158.0, 144.6, 133.0, 129.8, 129.4, 127.6, 113.9, 113.8, 61.0, 56.4, 55.3, 34.9, 30.9, 20.4, 14.3. HRMS (ESI-Q-TOF)  $m/z$ :  $[M + H]^+$  calcd for  $C_{20}H_{26}NO_3$  328.1907; found 328.1908.

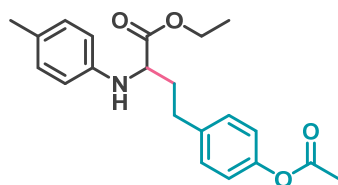

**Ethyl 4-(4-acetoxyphenyl)-2-(p-tolylamino)butanoate (C38).** The desired pure product was obtained in 45% yield (31.9 mg) as a colorless oil.  $^1\text{H}$  NMR (400 MHz,  $\text{CDCl}_3$ )  $\delta$  7.18 (d,  $J = 8.2$  Hz, 2H), 7.03 - 6.94 (m, 4H), 6.52 (d,  $J = 8.4$  Hz, 2H), 4.15 (q,  $J = 7.1$  Hz, 2H), 4.06 - 4.00 (m, 2H), 2.75 (t,  $J = 7.8$  Hz, 2H), 2.28 (s, 3H), 2.23 (s, 3H), 2.18 - 2.10 (m, 1H), 2.09 - 1.93 (m, 1H), 1.24 (t,  $J = 7.2$  Hz, 3H).  $^{13}\text{C}$  NMR (151 MHz,  $\text{CDCl}_3$ )  $\delta$  174.0, 169.6, 149.0, 144.5, 138.5, 129.8, 129.4, 127.6, 121.5, 113.8, 61.1, 56.4, 34.6, 31.1, 21.1, 20.4, 14.2. HRMS (ESI-Q-TOF)  $m/z$ :  $[\text{M} + \text{H}]^+$  calcd for  $\text{C}_{21}\text{H}_{26}\text{NO}_4$  356.1856; found 356.1855.

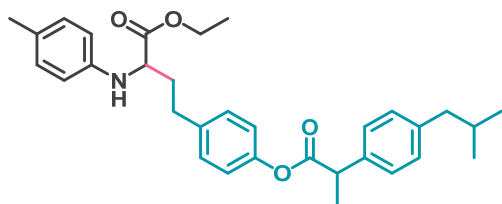

**Ethyl 4-(4-((2-(4-isobutylphenyl)propanoyl)oxy)phenyl)-2-(p-tolylamino)butanoate (C39).** The desired pure product was obtained in 30% yield (30.1 mg) as a colorless oil.  $^1\text{H}$  NMR (600 MHz,  $\text{CDCl}_3$ )  $\delta$  7.29 (d,  $J = 8.0$  Hz, 2H), 7.13 (d,  $J = 7.1$  Hz, 4H), 6.96 (d,  $J = 8.0$  Hz, 2H), 6.90 (d,  $J = 8.5$  Hz, 2H), 6.51 (d,  $J = 8.4$  Hz, 2H), 4.14 (q,  $J = 7.1$  Hz, 2H), 4.00 (s, 2H), 3.92 (q,  $J = 7.2$  Hz, 1H), 2.76 - 2.70 (m, 2H), 2.47 (d,  $J = 7.2$  Hz, 2H), 2.22 (s, 3H), 2.15 - 2.07 (m, 1H), 2.02 - 1.95 (m, 1H), 1.89 - 1.83 (m, 1H), 1.59 (d,  $J = 7.1$  Hz, 3H), 1.22 (t,  $J = 7.1$  Hz, 3H), 0.91 (d,  $J = 6.5$  Hz, 6H).  $^{13}\text{C}$  NMR (151 MHz,  $\text{CDCl}_3$ )  $\delta$  174.1, 173.3, 149.2, 144.5, 140.8, 138.4, 137.26, 129.8, 129.5, 129.3, 127.7, 127.2, 121.3, 113.8, 61.0, 56.3, 45.2, 45.0, 34.6, 31.1, 30.2, 22.4, 20.4, 18.5, 14.2. HRMS (ESI-Q-TOF)  $m/z$ :  $[\text{M} + \text{H}]^+$  calcd for  $\text{C}_{32}\text{H}_{40}\text{NO}_4$  502.2952; found 502.2954.

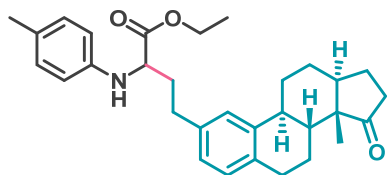

**Ethyl 4-((8R,9S,13S,14S)-14-methyl-15-oxo-7,8,9,11,12,13,14,15,16,17-decahydro-6H-cyclopenta[a]phenanthren-2-yl)-2-(p-tolylamino)butanoate (C40).** The desired pure product was obtained in 18% yield (17.1 mg) as a colorless oil.  $^1\text{H}$  NMR (600 MHz,  $\text{CDCl}_3$ )  $\delta$  7.21 (d,  $J = 8.0$  Hz, 1H), 7.02 - 6.94 (m, 3H), 6.92 (s, 1H), 6.53 (d,  $J = 8.3$  Hz, 2H), 4.20 - 4.13 (m, 2H), 4.04 (t,  $J = 7.6, 5.4$  Hz, 2H), 2.91 - 2.85 (m, 2H), 2.50 (dd,  $J = 18.6, 8.4$  Hz, 1H), 2.44 - 2.37

(m, 1H), 2.32 - 2.26 (m, 1H), 2.23 (s, 3H), 2.19 - 2.11 (m, 2H), 2.09 - 1.92 (m, 4H), 1.68 - 1.57 (m, 2H), 1.55 - 1.38 (m, 4H), 1.24 (t,  $J = 7.1$  Hz, 3H), 0.91 (s, 3H).  $^{13}\text{C}$  NMR (151 MHz,  $\text{CDCl}_3$ )  $\delta$  220.9, 174.2, 144.6, 138.5, 137.5, 136.5, 129.8, 129.2, 129.1, 127.6, 125.93, 125.92, 125.5, 113.8, 61.0, 56.62, 56.61, 50.5, 48.0, 44.3, 38.2, 35.9, 34.8, 31.6, 31.3, 29.4, 26.5, 25.7, 21.6, 20.4, 14.3, 13.8. HRMS (ESI-Q-TOF)  $m/z$ :  $[\text{M} + \text{H}]^+$  calcd for  $\text{C}_{31}\text{H}_{40}\text{NO}_3$  474.3003; found 474.3003.

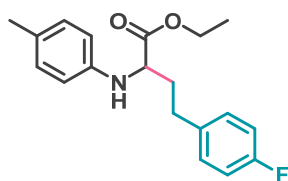

**Ethyl 4-(4-fluorophenyl)-2-(p-tolylamino)butanoate (C41).** The desired pure product was obtained in 32% yield (20.1 mg) as a colorless oil.  $^1\text{H}$  NMR (600 MHz,  $\text{CDCl}_3$ )  $\delta$  7.13 (dd,  $J = 8.5, 5.5$  Hz, 2H), 7.01 - 6.91 (m, 4H), 6.51 (d,  $J = 8.3$  Hz, 2H), 4.16 (q,  $J = 7.2$  Hz, 2H), 4.04 - 3.95 (m, 2H), 2.74 (t,  $J = 8.4$  Hz, 2H), 2.23 (s, 3H), 2.15 - 2.08 (m, 1H), 2.04 - 1.97 (m, 1H), 1.24 (t,  $J = 7.1$  Hz, 3H).  $^{13}\text{C}$  NMR (151 MHz,  $\text{CDCl}_3$ )  $\delta$  174.1, 161.4 (d,  $J = 243.9$  Hz), 144.5, 136.5 (d,  $J = 3.3$  Hz), 129.9 (d,  $J = 7.6$  Hz), 129.8, 127.7, 115.2 (d,  $J = 21.1$  Hz), 113.8, 61.1, 56.3, 34.8, 31.0, 20.4, 14.2.  $^{19}\text{F}$  NMR (376 MHz,  $\text{CDCl}_3$ )  $\delta$  -117.25. HRMS (ESI-Q-TOF)  $m/z$ :  $[\text{M} + \text{H}]^+$  calcd for  $\text{C}_{19}\text{H}_{23}\text{FNO}_2$  316.1707; found 316.1706.

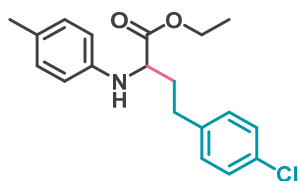

**Ethyl 4-(4-chlorophenyl)-2-(p-tolylamino)butanoate (C42).** The desired pure product was obtained in 36% yield (23.8 mg) as a colorless oil.  $^1\text{H}$  NMR (400 MHz,  $\text{CDCl}_3$ )  $\delta$  7.25 (d,  $J = 8.4$  Hz, 2H), 7.11 (d,  $J = 8.3$  Hz, 2H), 6.97 (d,  $J = 8.4$  Hz, 2H), 6.51 (d,  $J = 8.4$  Hz, 2H), 4.15 (q,  $J = 7.1$  Hz, 2H), 4.03 - 3.95 (m, 2H), 2.74 (t,  $J = 8.1$  Hz, 2H), 2.23 (s, 3H), 2.17 - 2.08 (m, 1H), 2.06 - 1.95 (m, 1H), 1.24 (t,  $J = 7.2$  Hz, 3H).  $^{13}\text{C}$  NMR (151 MHz,  $\text{CDCl}_3$ )  $\delta$  174.0, 144.5, 139.4, 131.9, 129.9, 129.8, 128.6, 127.8, 113.8, 61.1, 56.3, 34.5, 31.1, 20.4, 14.2. HRMS (ESI-Q-TOF)  $m/z$ :  $[\text{M} + \text{H}]^+$  calcd for  $\text{C}_{19}\text{H}_{23}\text{ClNO}_2$  332.1412; found 332.1412.

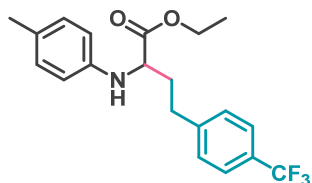

**Ethyl 2-(p-tolylamino)-4-(4-(trifluoromethyl)phenyl)butanoate (C43).** The desired pure product was obtained in 27% yield (19.7mg) as a colorless oil.  $^1\text{H}$  NMR (400 MHz,  $\text{CDCl}_3$ )  $\delta$  7.54 (d,  $J = 8.0$  Hz, 2H), 7.29 (d,  $J = 8.0$  Hz, 2H), 6.98 (d,  $J = 8.2$  Hz, 2H), 6.52 (d,  $J = 8.0$  Hz, 2H), 4.16 (q,  $J = 7.3$  Hz, 2H), 4.02 (dd,  $J = 7.4, 5.6$  Hz, 1H), 2.83 (t,  $J = 8.0$  Hz, 2H), 2.23 (s, 3H), 2.22 - 2.12 (m, 1H), 2.08 - 1.99 (m, 1H), 1.24 (t,  $J = 7.1$  Hz, 3H).  $^{13}\text{C}$  NMR (151 MHz,  $\text{CDCl}_3$ )  $\delta$  173.9, 145.1, 144.4, 129.8, 128.8, 128.5 (q,  $J = 31.9$  Hz), 127.9, 125.4 (q,  $J = 3.9$  Hz), 124.3 (q,  $J = 271.7$  Hz), 113.8, 61.2, 56.3, 34.3, 31.6, 20.4, 14.2.  $^{19}\text{F}$  NMR (376 MHz,  $\text{CDCl}_3$ )  $\delta$  -62.39. HRMS (ESI-Q-TOF)  $m/z$ :  $[\text{M} + \text{H}]^+$  calcd for  $\text{C}_{20}\text{H}_{23}\text{F}_3\text{NO}_2$  366.1675; found 366.1676.

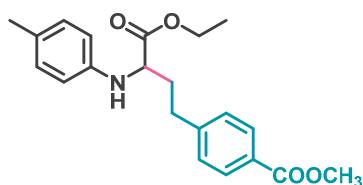

**Methyl 4-(4-ethoxy-4-oxo-3-(p-tolylamino)butyl)benzoate (C44).** The desired pure product was obtained in 37% yield (26.3 mg) as a white solid. m.p. = 83 - 85 °C.  $^1\text{H}$  NMR (600 MHz,  $\text{CDCl}_3$ )  $\delta$  7.96 (d,  $J = 8.3$  Hz, 2H), 7.25 (d,  $J = 8.2$  Hz, 2H), 6.97 (d,  $J = 8.1$  Hz, 2H), 6.52 (d,  $J = 8.5$  Hz, 2H), 4.16 (q,  $J = 7.2$  Hz, 2H), 4.01 (dd,  $J = 7.4, 5.6$  Hz, 1H), 3.90 (s, 3H), 2.85 - 2.78 (m, 2H), 2.23 (s, 3H), 2.19 - 2.13 (m, 1H), 2.08 - 2.01 (m, 1H), 1.24 (t,  $J = 7.1$  Hz, 3H).  $^{13}\text{C}$  NMR (151 MHz,  $\text{CDCl}_3$ )  $\delta$  173.9, 167.0, 146.5, 144.4, 129.8, 129.8, 128.6, 128.2, 127.8, 113.9, 61.1, 56.4, 52.0, 34.2, 31.8, 20.4, 14.2. HRMS (ESI-Q-TOF)  $m/z$ :  $[\text{M} + \text{H}]^+$  calcd for  $\text{C}_{21}\text{H}_{26}\text{NO}_4$  356.1856; found 356.1857.

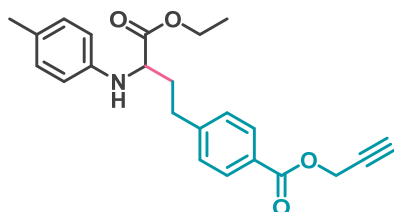

**Prop-2-yn-1-yl 4-(4-ethoxy-4-oxo-3-(p-tolylamino)butyl)benzoate (C45).** The desired pure product was obtained in 30% yield (22.7 mg) as a colorless oil.  $^1\text{H}$  NMR (400 MHz,  $\text{CDCl}_3$ )  $\delta$

7.99 (d,  $J = 8.3$  Hz, 2H), 7.27 (d,  $J = 8.4$  Hz, 2H), 6.98 (d,  $J = 8.2$  Hz, 2H), 6.52 (d,  $J = 8.4$  Hz, 2H), 4.92 (d,  $J = 2.4$  Hz, 2H), 4.16 (q,  $J = 7.1$  Hz, 2H), 4.07 - 3.98 (m, 2H), 2.87 - 2.79 (m, 2H), 2.51 (t,  $J = 2.5$  Hz, 1H), 2.23 (s, 3H), 2.20 - 2.12 (m, 1H), 2.09 - 1.99 (m, 1H), 1.24 (t,  $J = 7.2$  Hz, 3H).  $^{13}\text{C}$  NMR (151 MHz,  $\text{CDCl}_3$ )  $\delta$  173.9, 165.7, 147.0, 144.4, 130.1, 129.8, 128.6, 127.8, 127.4, 113.8, 77.8, 74.9, 61.1, 56.3, 52.3, 34.2, 31.8, 20.4, 14.2. HRMS (ESI-Q-TOF)  $m/z$ :  $[\text{M} + \text{H}]^+$  calcd for  $\text{C}_{23}\text{H}_{26}\text{NO}_4$  380.1856; found 380.1858.

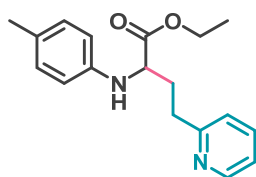

**Ethyl 4-(pyridin-2-yl)-2-(p-tolylamino)butanoate (C46).** The desired pure product was obtained in 40% yield (25.0 mg) as a yellow oil.  $^1\text{H}$  NMR (400 MHz,  $\text{CDCl}_3$ )  $\delta$  8.54 (d,  $J = 4.3$  Hz, 1H), 7.60 - 7.54 (m, 1H), 7.21 - 7.06 (m, 2H), 6.96 (d,  $J = 8.0$  Hz, 2H), 6.53 (d,  $J = 8.4$  Hz, 2H), 4.20 - 4.11 (m, 3H), 4.05 (s, 1H), 2.99 - 2.92 (m, 2H), 2.36 - 2.26 (m, 1H), 2.22 (s, 3H), 2.20 - 2.13 (m, 1H), 1.23 (t,  $J = 7.1$  Hz, 3H).  $^{13}\text{C}$  NMR (151 MHz,  $\text{CDCl}_3$ )  $\delta$  32.6, 20.4, 14.2. HRMS (ESI-Q-TOF)  $m/z$ :  $[\text{M} + \text{H}]^+$  calcd for  $\text{C}_{18}\text{H}_{23}\text{N}_2\text{O}_2$  299.1754; found 299.1753.

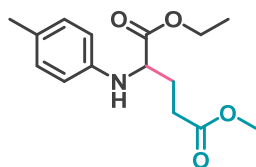

**1-ethyl 5-methyl p-tolylglutamate (C47).** The desired pure product was obtained in 54% yield (30.1 mg) as a colorless oil.  $^1\text{H}$  NMR (400 MHz,  $\text{CDCl}_3$ )  $\delta$  6.98 (d,  $J = 8.0$  Hz, 2H), 6.55 (d,  $J = 8.4$  Hz, 2H), 4.17 (q,  $J = 7.1$  Hz, 2H), 4.10 - 4.01 (m, 2H), 3.67 (s, 3H), 2.56 - 2.41 (m, 2H), 2.22 (s, 3H), 2.21 - 2.13 (m, 1H), 2.11 - 2.01 (m, 1H), 1.25 (t,  $J = 7.1$  Hz, 3H).  $^{13}\text{C}$  NMR (151 MHz,  $\text{CDCl}_3$ )  $\delta$  173.6, 173.4, 144.4, 129.8, 127.8, 113.8, 61.2, 56.4, 51.7, 30.2, 27.9, 20.4, 14.2. HRMS (ESI-Q-TOF)  $m/z$ :  $[\text{M} + \text{H}]^+$  calcd for  $\text{C}_{15}\text{H}_{22}\text{NO}_4$  280.1543; found 280.1544.

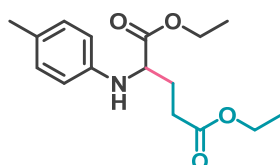

**Diethyl *p*-tolylglutamate (C48).** The desired pure product was obtained in 66% yield (38.6 mg) as a colorless oil.  $^1\text{H}$  NMR (400 MHz,  $\text{CDCl}_3$ )  $\delta$  6.98 (d,  $J = 8.6$  Hz, 2H), 6.55 (d,  $J = 8.4$  Hz, 2H), 4.20 - 4.05 (m, 5H), 2.53 - 2.39 (m, 2H), 2.23 (s, 3H), 2.20 - 2.12 (m, 1H), 2.11 - 2.00 (m, 1H), 1.28 - 1.20 (m, 6H).  $^{13}\text{C}$  NMR (151 MHz,  $\text{CDCl}_3$ )  $\delta$  173.7, 172.9, 144.4, 129.8, 127.8, 113.8, 61.2, 60.6, 56.5, 30.5, 28.0, 20.4, 14.2, 14.2. HRMS (ESI-Q-TOF)  $m/z$ :  $[\text{M} + \text{H}]^+$  calcd for  $\text{C}_{16}\text{H}_{24}\text{NO}_4$  294.1700; found 294.1700.

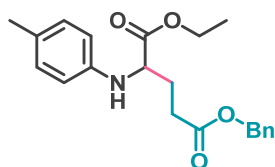

**5-benzyl 1-ethyl *p*-tolylglutamate (C49).** The desired pure product was obtained in 42% yield (29.8 mg) as a yellow oil.  $^1\text{H}$  NMR (600 MHz,  $\text{CDCl}_3$ )  $\delta$  7.37 - 7.31 (m, 5H), 6.96 (d,  $J = 8.5$  Hz, 2H), 6.52 (d,  $J = 8.3$  Hz, 2H), 5.14 - 5.08 (m, 2H), 4.20 - 4.12 (m, 2H), 4.10 - 4.06 (m, 1H), 4.03 (s, 1H), 2.59 - 2.48 (m, 2H), 2.22 (s, 3H), 2.21 - 2.16 (m, 1H), 2.11 - 2.04 (m, 1H), 1.23 (t,  $J = 7.1$  Hz, 3H).  $^{13}\text{C}$  NMR (151 MHz,  $\text{CDCl}_3$ )  $\delta$  173.6, 172.7, 144.4, 135.8, 129.8, 128.5, 128.3, 127.8, 113.9, 66.4, 61.2, 56.4, 30.4, 28.0, 20.4, 14.2. HRMS (ESI-Q-TOF)  $m/z$ :  $[\text{M} + \text{H}]^+$  calcd for  $\text{C}_{21}\text{H}_{26}\text{NO}_4$  356.1856; found 356.1858.

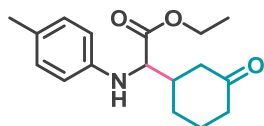

**Ethyl 2-(3-oxocyclohexyl)-2-(*p*-tolylamino)acetate (C50).** The desired pure product was obtained in 57% yield (32.9 mg, dr = 1.1:1) as a yellow oil.  $^1\text{H}$  NMR (600 MHz,  $\text{CDCl}_3$ )  $\delta$  6.99 (dd,  $J = 8.3, 2.5$  Hz, 2H), 6.57 (dd,  $J = 8.5, 2.0$  Hz, 2H), 4.22 - 4.15 (m, 2H), 4.12 - 4.04 (m, 1H), 4.01 - 3.90 (m, 1H), 2.49 - 2.25 (m, 5H), 2.23 (d,  $J = 2.1$  Hz, 3H), 2.15 - 2.07 (m, 1H), 1.99 - 1.90 (m, 1H), 1.72 - 1.52 (m, 2H), 1.30 - 1.22 (m, 3H).  $^{13}\text{C}$  NMR (151 MHz,  $\text{CDCl}_3$ )  $\delta$  210.5, 210.3, 172.8, 172.6, 144.9, 144.7, 129.9, 129.8, 128.2, 128.0, 114.3, 114.1, 61.6, 61.4, 61.4, 61.3, 45.0, 43.7, 42.0, 41.8, 41.1, 41.1, 28.1, 26.6, 24.9, 24.7, 20.3, 14.2, 14.2. HRMS (ESI-Q-TOF)  $m/z$ :  $[\text{M} + \text{H}]^+$  calcd for  $\text{C}_{17}\text{H}_{24}\text{NO}_3$  290.1751; found 290.1750.

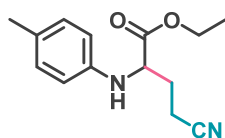

**Ethyl 4-cyano-2-(p-tolylamino)butanoate (C51).** The desired pure product was obtained in 61% yield (30.1 mg) as a colorless oil.  $^1\text{H}$  NMR (600 MHz,  $\text{CDCl}_3$ )  $\delta$  7.00 (d,  $J = 7.9$  Hz, 2H), 6.59 (d,  $J = 8.4$  Hz, 2H), 4.21 (q,  $J = 7.1$  Hz, 2H), 4.16 - 4.10 (m, 1H), 4.05 (d,  $J = 8.9$  Hz, 1H), 2.61 - 2.44 (m, 2H), 2.27 - 2.20 (m, 4H), 2.07 - 2.01 (m, 1H), 1.27 (t,  $J = 7.2$  Hz, 3H).  $^{13}\text{C}$  NMR (151 MHz,  $\text{CDCl}_3$ )  $\delta$  172.6, 143.9, 129.9, 128.5, 118.9, 114.2, 61.7, 55.8, 28.6, 20.3, 14.1, 13.6. HRMS (ESI-Q-TOF)  $m/z$ :  $[\text{M} + \text{H}]^+$  calcd for  $\text{C}_{14}\text{H}_{19}\text{N}_2\text{O}_2$  247.1441; found 247.1441.

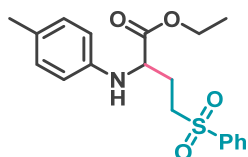

**Ethyl 4-(phenylsulfonyl)-2-(p-tolylamino)butanoate (C52).** The desired pure product was obtained in 30% yield (21.6 mg) as a yellow oil.  $^1\text{H}$  NMR (600 MHz,  $\text{CDCl}_3$ )  $\delta$  7.89 (d,  $J = 8.1$  Hz, 2H), 7.67 - 7.62 (m, 1H), 7.58 - 7.52 (m, 2H), 6.95 (d,  $J = 8.0$  Hz, 2H), 6.50 (d,  $J = 8.4$  Hz, 2H), 4.15 (q,  $J = 7.2$  Hz, 2H), 4.11 - 4.06 (m, 1H), 3.96 (d,  $J = 8.9$  Hz, 1H), 3.29 - 3.20 (m, 2H), 2.33 - 2.28 (m, 1H), 2.21 (s, 3H), 2.13 - 2.07 (m, 1H), 1.21 (t,  $J = 7.2$  Hz, 3H).  $^{13}\text{C}$  NMR (151 MHz,  $\text{CDCl}_3$ )  $\delta$  172.8, 143.9, 138.9, 133.8, 129.9, 129.4, 128.4, 128.0, 114.1, 61.6, 55.7, 52.6, 26.0, 20.4, 14.1. HRMS (ESI-Q-TOF)  $m/z$ :  $[\text{M} + \text{H}]^+$  calcd for  $\text{C}_{19}\text{H}_{24}\text{NO}_4\text{S}$  362.1421; found 362.1421.

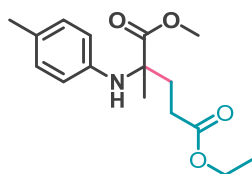

**5-ethyl 1-methyl 2-methyl-2-(p-tolylamino)pentanedioate (C53).** The desired pure product was obtained in 40% yield (23.5 mg) as a colorless oil.  $^1\text{H}$  NMR (600 MHz,  $\text{CDCl}_3$ )  $\delta$  6.96 (d,  $J = 7.9$  Hz, 2H), 6.53 (d,  $J = 8.3$  Hz, 2H), 4.09 (q,  $J = 7.2$  Hz, 2H), 3.71 (s, 3H), 2.44 - 2.38 (m, 1H), 2.36 - 2.28 (m, 2H), 2.27 - 2.23 (m, 1H), 2.22 (s, 3H), 1.50 (s, 3H), 1.22 (t,  $J = 7.1$  Hz, 3H).  $^{13}\text{C}$  NMR (151 MHz,  $\text{CDCl}_3$ )  $\delta$  176.0, 173.2, 142.6, 129.6, 128.2, 116.4, 60.5, 60.3, 52.5, 33.1, 29.1, 23.3, 20.4, 14.1. HRMS (ESI-Q-TOF)  $m/z$ :  $[\text{M} + \text{H}]^+$  calcd for  $\text{C}_{16}\text{H}_{24}\text{NO}_4$  294.1700; found 294.1696.



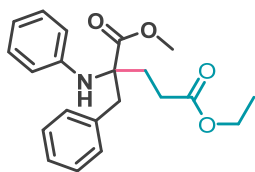

**5-ethyl 1-methyl 2-benzyl-2-(phenylamino)pentanedioate (C54).** The desired pure product was obtained in 10% yield (7.1 mg) as a colorless oil.  $^1\text{H}$  NMR (600 MHz,  $\text{CDCl}_3$ )  $\delta$  7.22 - 7.17 (m, 5H), 6.95 - 6.92 (m, 2H), 6.78 - 6.72 (m, 1H), 6.70 - 6.67 (m, 2H), 4.56 (s, 1H), 4.05 (q,  $J = 7.1$  Hz, 2H), 3.71 (s, 3H), 3.49 (d,  $J = 13.7$  Hz, 1H), 3.17 (d,  $J = 13.8$  Hz, 1H), 2.58 - 2.51 (m, 1H), 2.44 - 2.35 (m, 2H), 2.23 - 2.16 (m, 1H), 1.20 (t,  $J = 7.2$  Hz, 3H).  $^{13}\text{C}$  NMR (151 MHz,  $\text{CDCl}_3$ )  $\delta$  174.2, 172.9, 144.8, 135.8, 130.0, 129.4, 128.1, 126.9, 117.8, 114.8, 65.0, 60.5, 52.6, 40.1, 31.1, 29.2, 14.1. HRMS (ESI-Q-TOF)  $m/z$ :  $[\text{M} + \text{H}]^+$  calcd for  $\text{C}_{21}\text{H}_{26}\text{NO}_4$  356.1856; found 356.1855.

## References

- [1] a) Nithinchandra, B. Kalluraya, S. Aamir, A. R. Shabaraya, *Eur. J. Med. Chem.* **2012**, *54*, 597-604; b) H. Zhi, S. P.-M. Ung, Y. Liu, L. Zhao, C.-J. Li, *Adv. Synth. Catal.* **2016**, *358*, 2553-2557.
- [2] a) P. Han, R. Wang, D. Z. Wang, *Tetrahedron* **2011**, *67*, 8873-8878; b) G. Zhang, R.-X. Bai, C.-H. Li, C.-G. Feng, G.-Q. Lin, *Tetrahedron* **2019**, *75*, 1658-1662.
- [3] a) Y. Miyake, K. Nakajima, Y. Nishibayashi, *J. Am. Chem. Soc.* **2012**, *134*, 3338-3341; b) C.-J. Wallentin, J. D. Nguyen, P. Finkbeiner, C. R. J. Stephenson, *J. Am. Chem. Soc.* **2012**, *134*, 8875-8884.
- [4] E. Rideau, H. You, M. Sidera, T. D. W. Claridge, S. P. Fletcher, *J. Am. Chem. Soc.* **2017**, *139*, 5614-5624.
- [5] D. Wang, F. Loose, P. J. Chirik, R. R. Knowles, *J. Am. Chem. Soc.* **2019**, *141*, 4795-4799.
- [6] N. A. Romero, K. A. Margrey, N. E. Tay and D. A. Nicewicz, *Science*, **2015**, *349*, 1326-1330.

<sup>1</sup>H NMR (400 MHz, CDCl<sub>3</sub>)

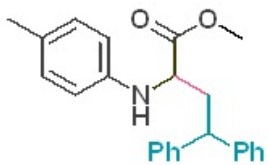

Cl

7.3051  
7.2876  
7.2686  
7.2601  
7.2432  
7.2388  
7.2249  
7.2171  
7.2128  
7.1997  
7.1953  
7.1832  
7.1670  
6.9257  
6.9090  
6.3807  
6.3595  
4.3006  
4.2838  
4.2615  
3.9192  
3.9064  
3.8844  
3.6173  
2.6259  
2.6132  
2.5909  
2.5682  
2.5553  
2.3949  
2.3785  
2.3615  
2.3442  
2.3232  
2.2044

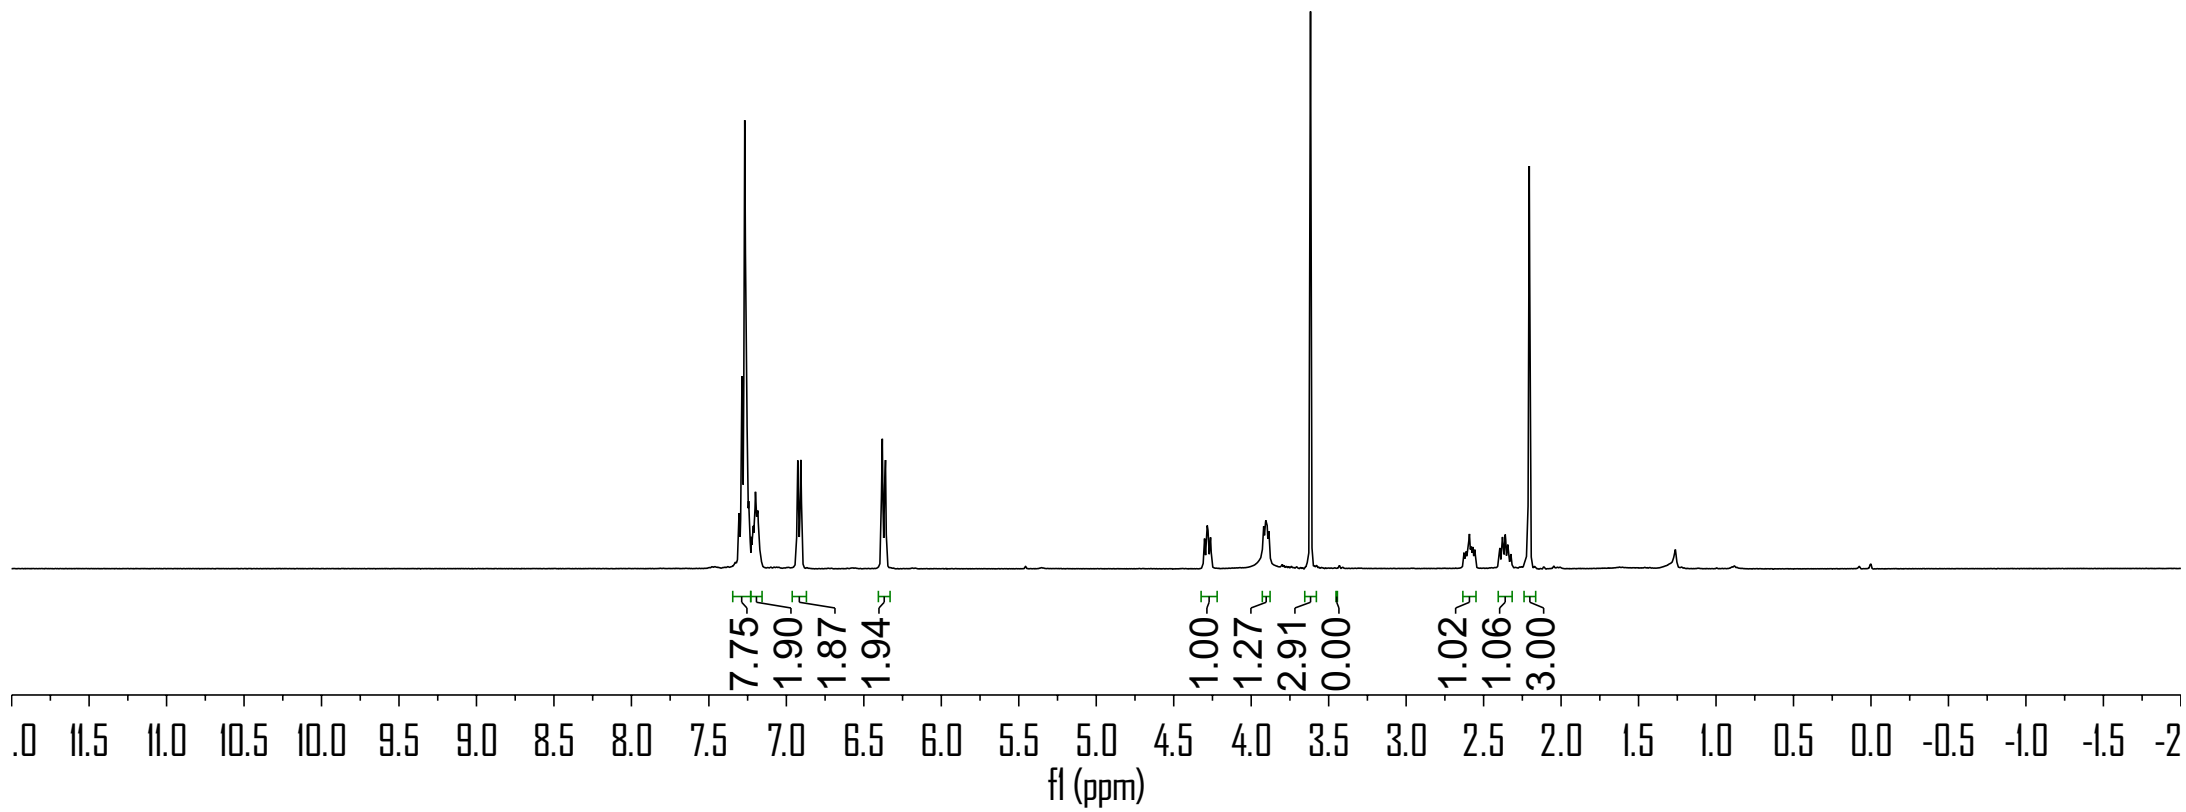

<sup>1</sup>H NMR (600 MHz, CDCl<sub>3</sub>)

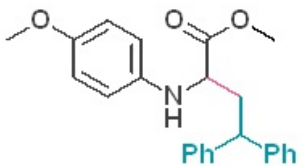

2

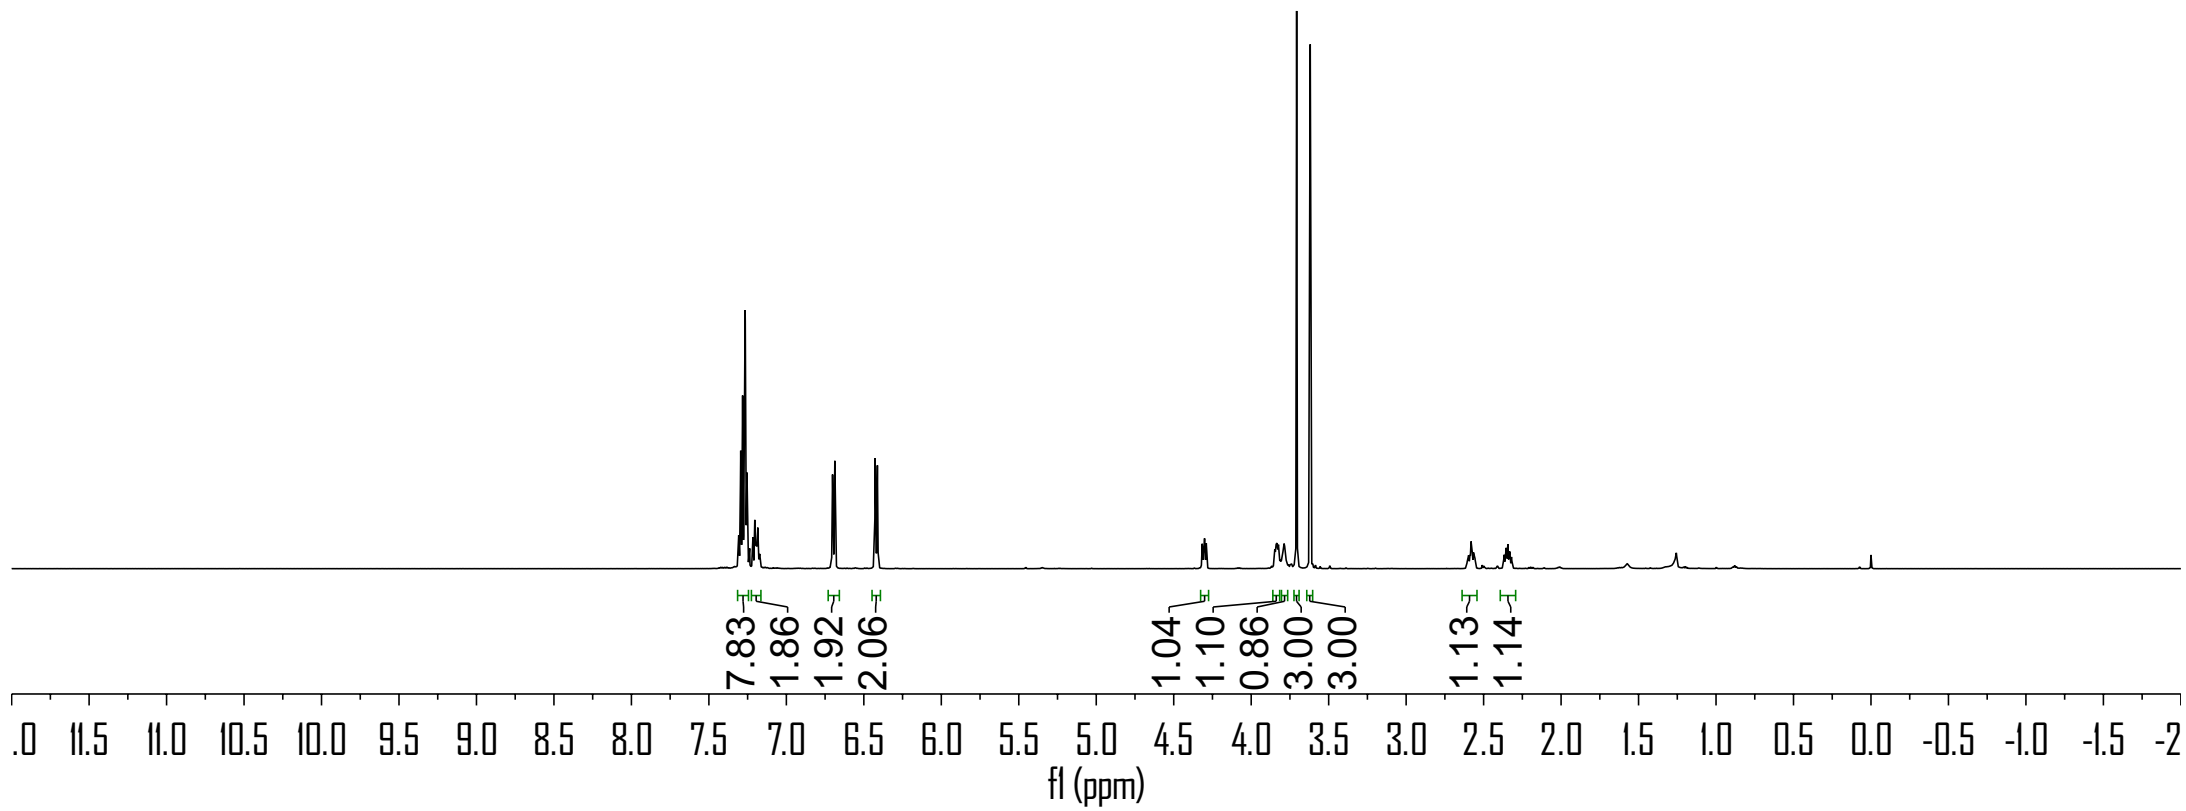

7.2821  
7.2721  
7.2600  
7.2474  
7.2333  
7.2184  
7.1957  
7.1840  
7.1729  
7.1641  
7.1612  
7.1212  
7.1077  
6.7399  
6.7251  
6.3616  
6.3469  
4.2550  
4.2442  
4.2391  
4.2290  
4.0086  
3.8895  
3.8775  
3.8654  
3.8538  
3.6103  
2.6040  
2.5952  
2.5882  
2.5804  
2.5722  
2.5651  
2.5569  
2.4614  
2.4495  
2.3672  
2.3565  
2.3526  
2.3433  
2.3335  
2.3296  
2.3194  
1.8652  
1.8540  
1.8427  
1.5680  
1.5561  
0.9056  
0.8946

<sup>1</sup>H NMR (600 MHz, CDCl<sub>3</sub>)

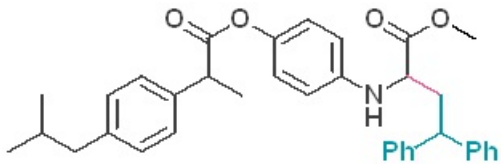

3

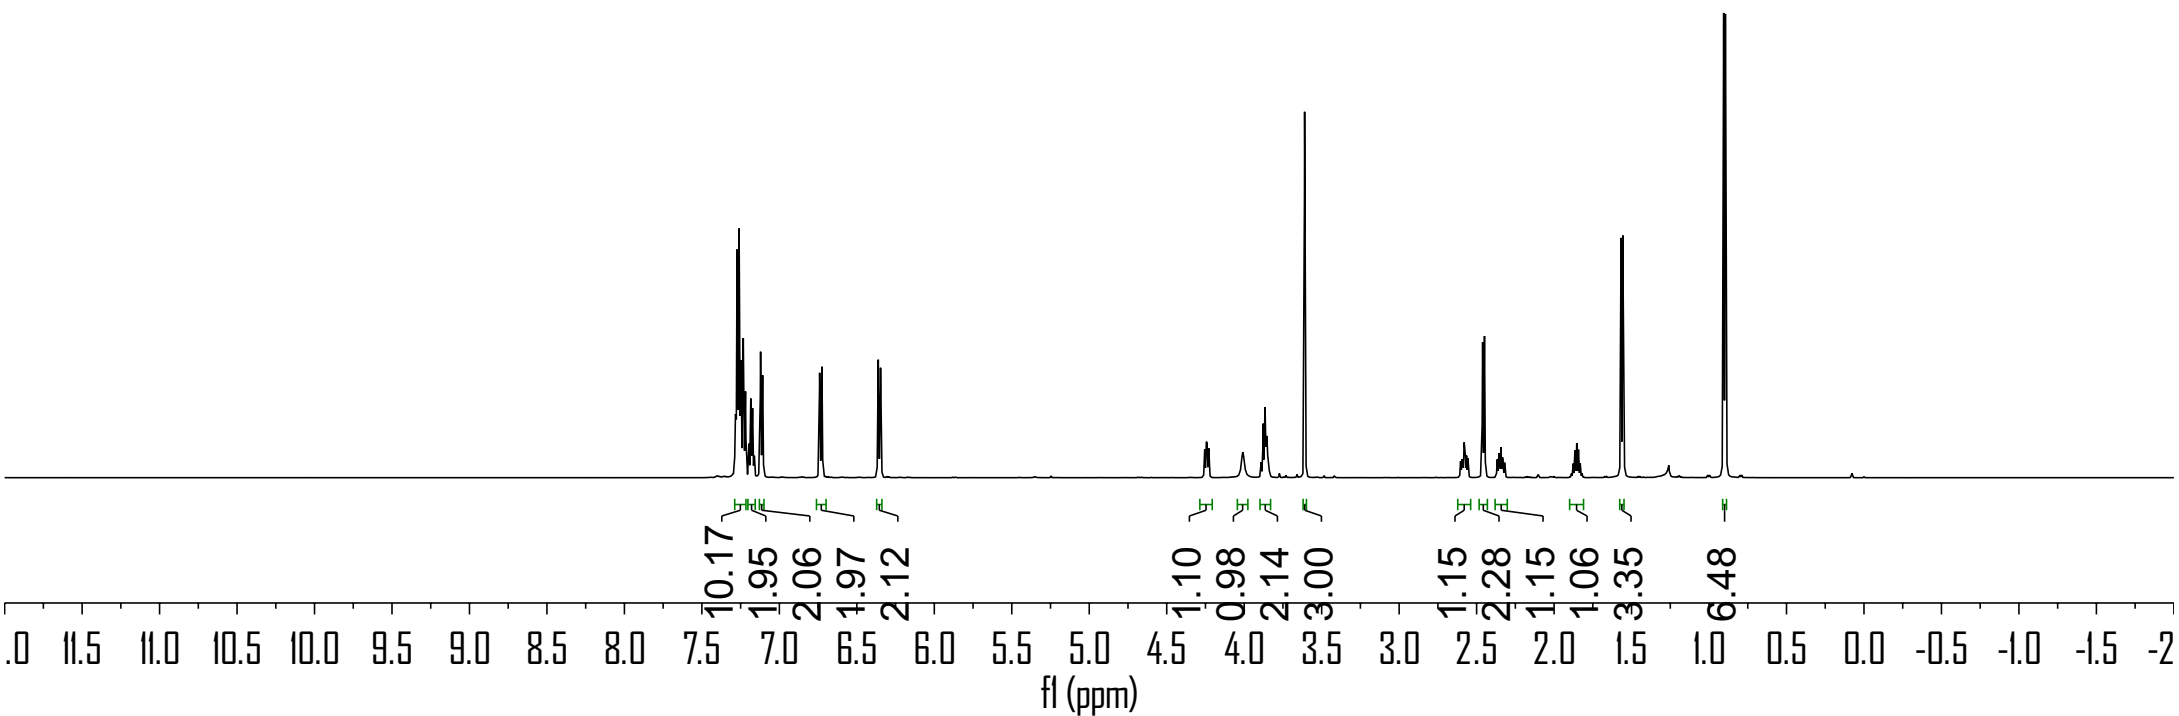

<sup>1</sup>H NMR (600 MHz, CDCl<sub>3</sub>)

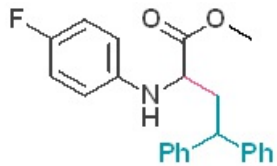

C4

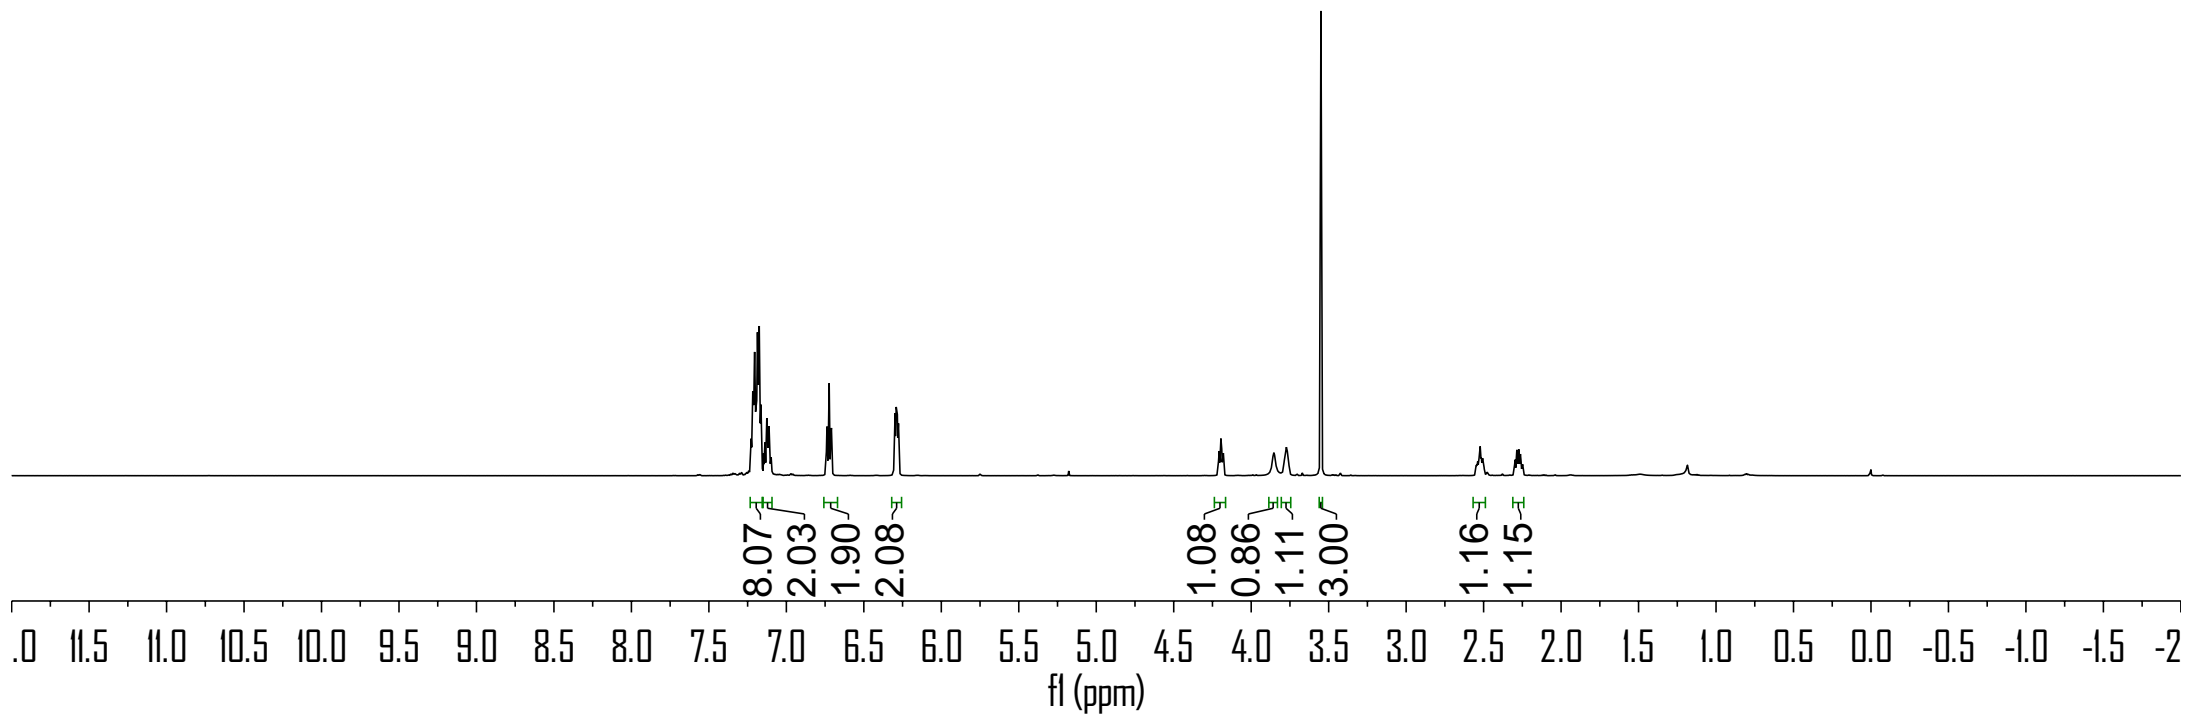

<sup>1</sup>H NMR (600 MHz, CDCl<sub>3</sub>)

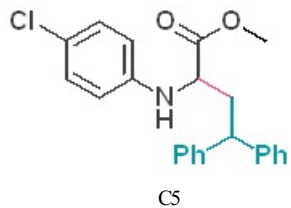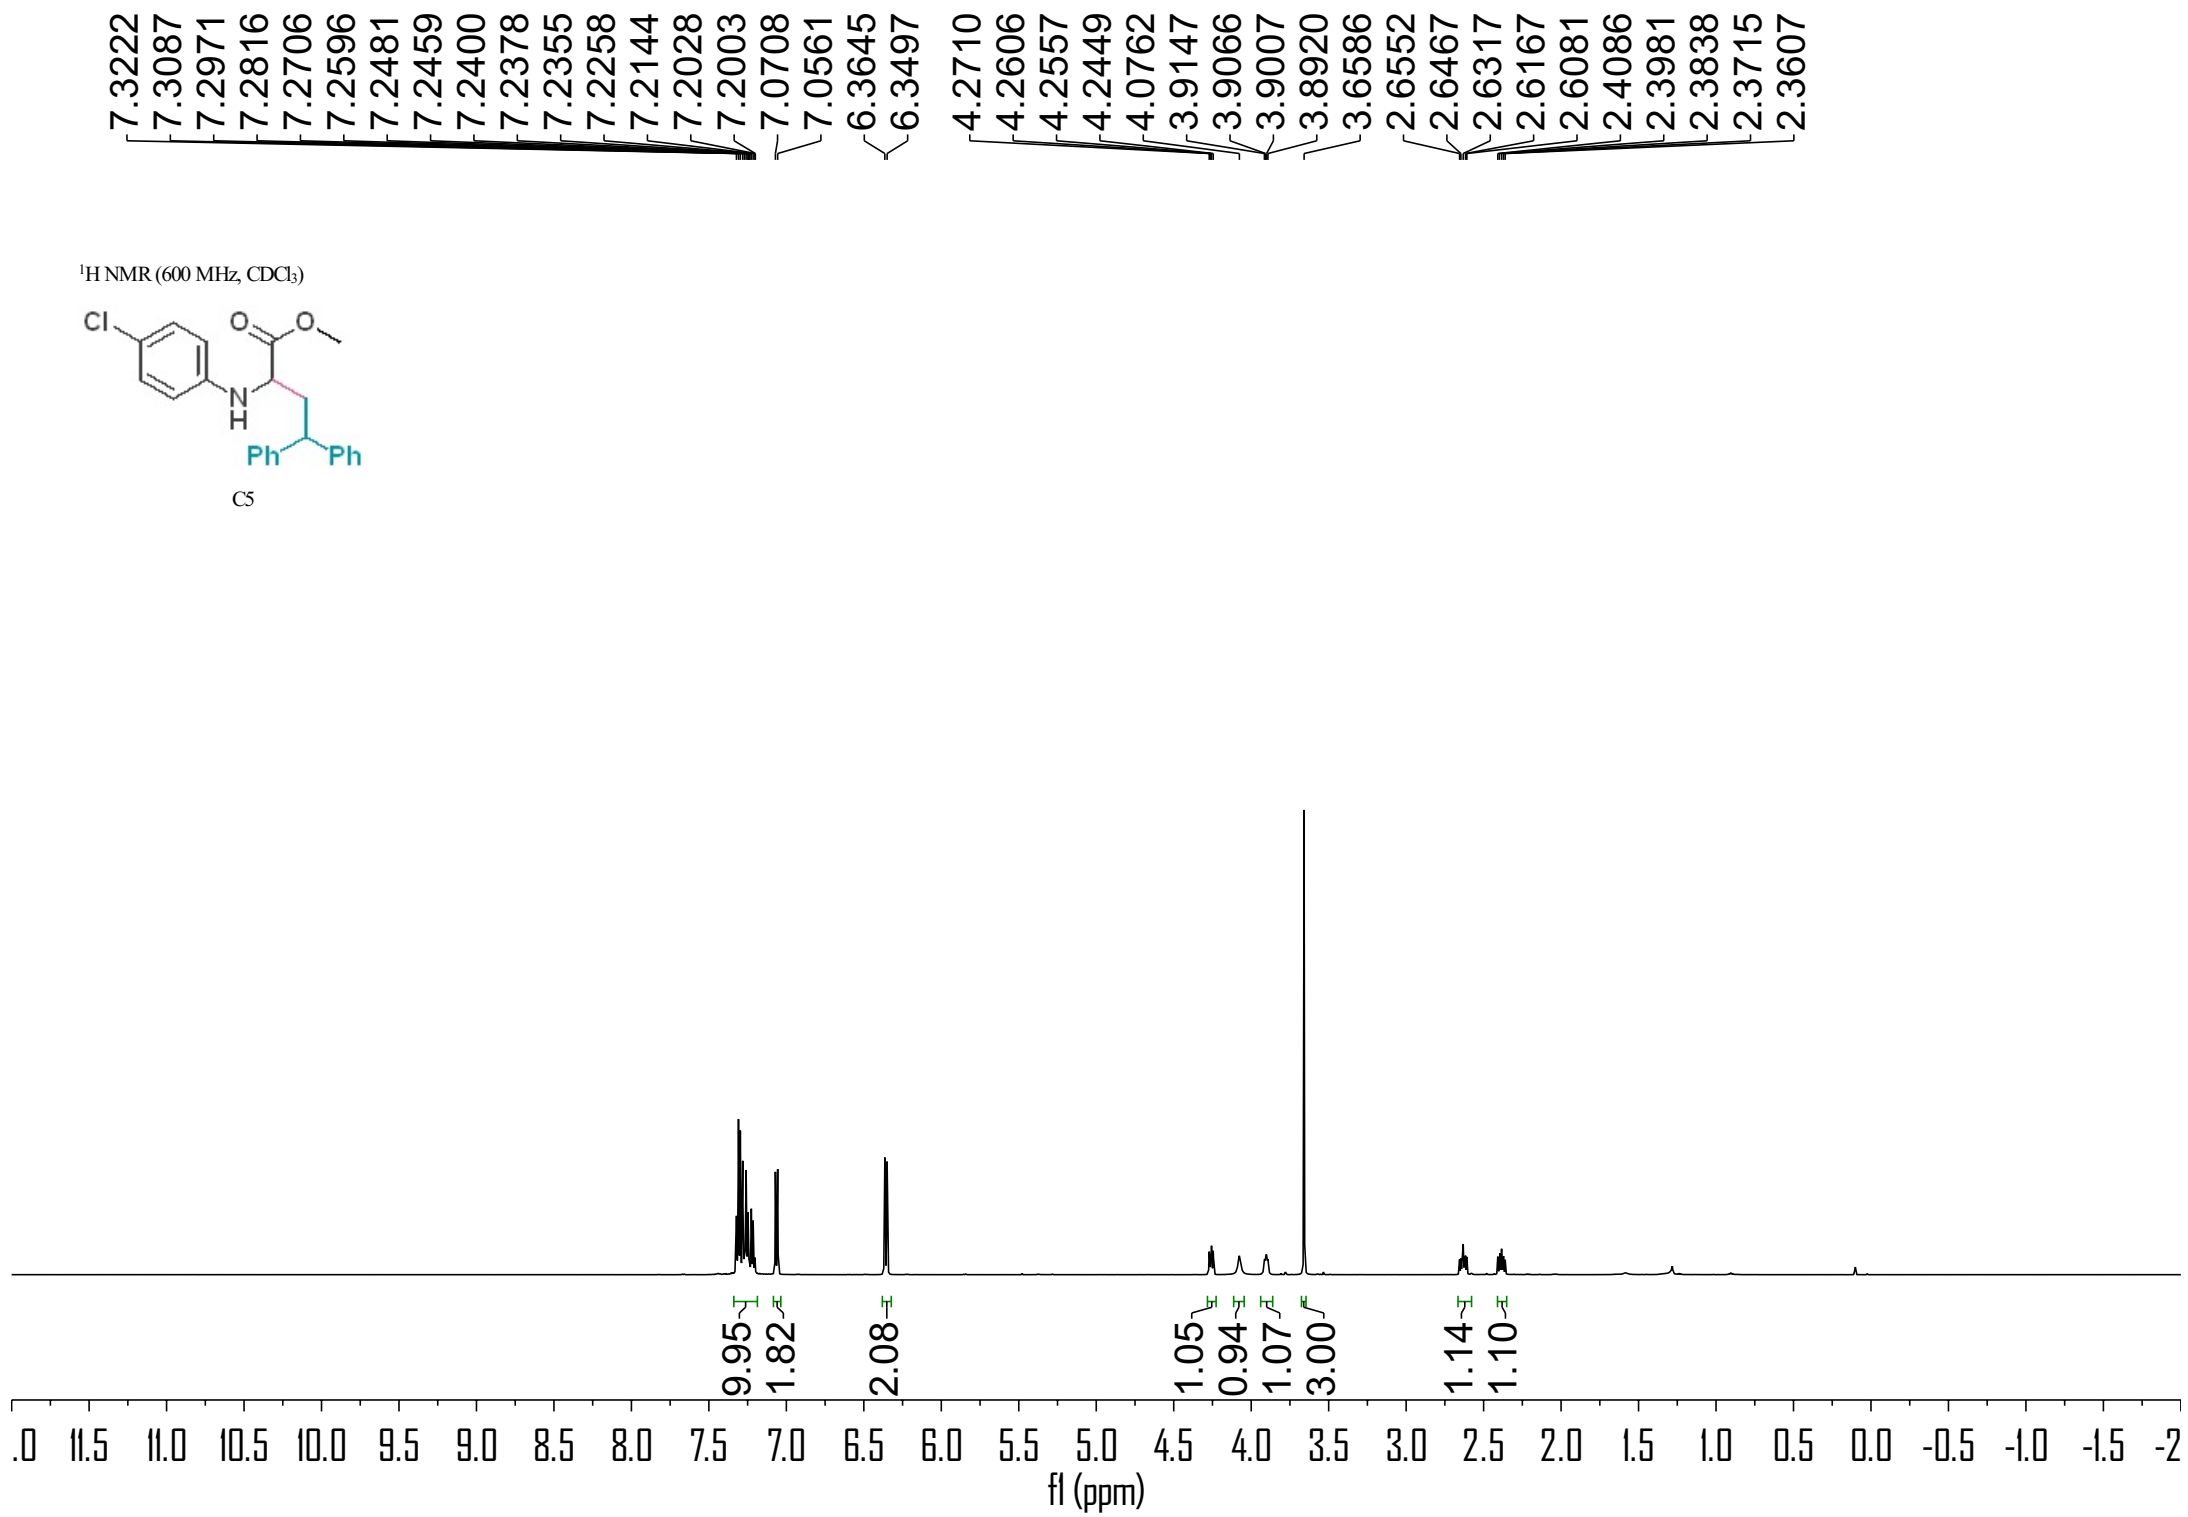

<sup>1</sup>H NMR (600 MHz, CDCl<sub>3</sub>)

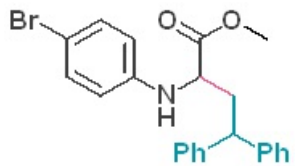

C6

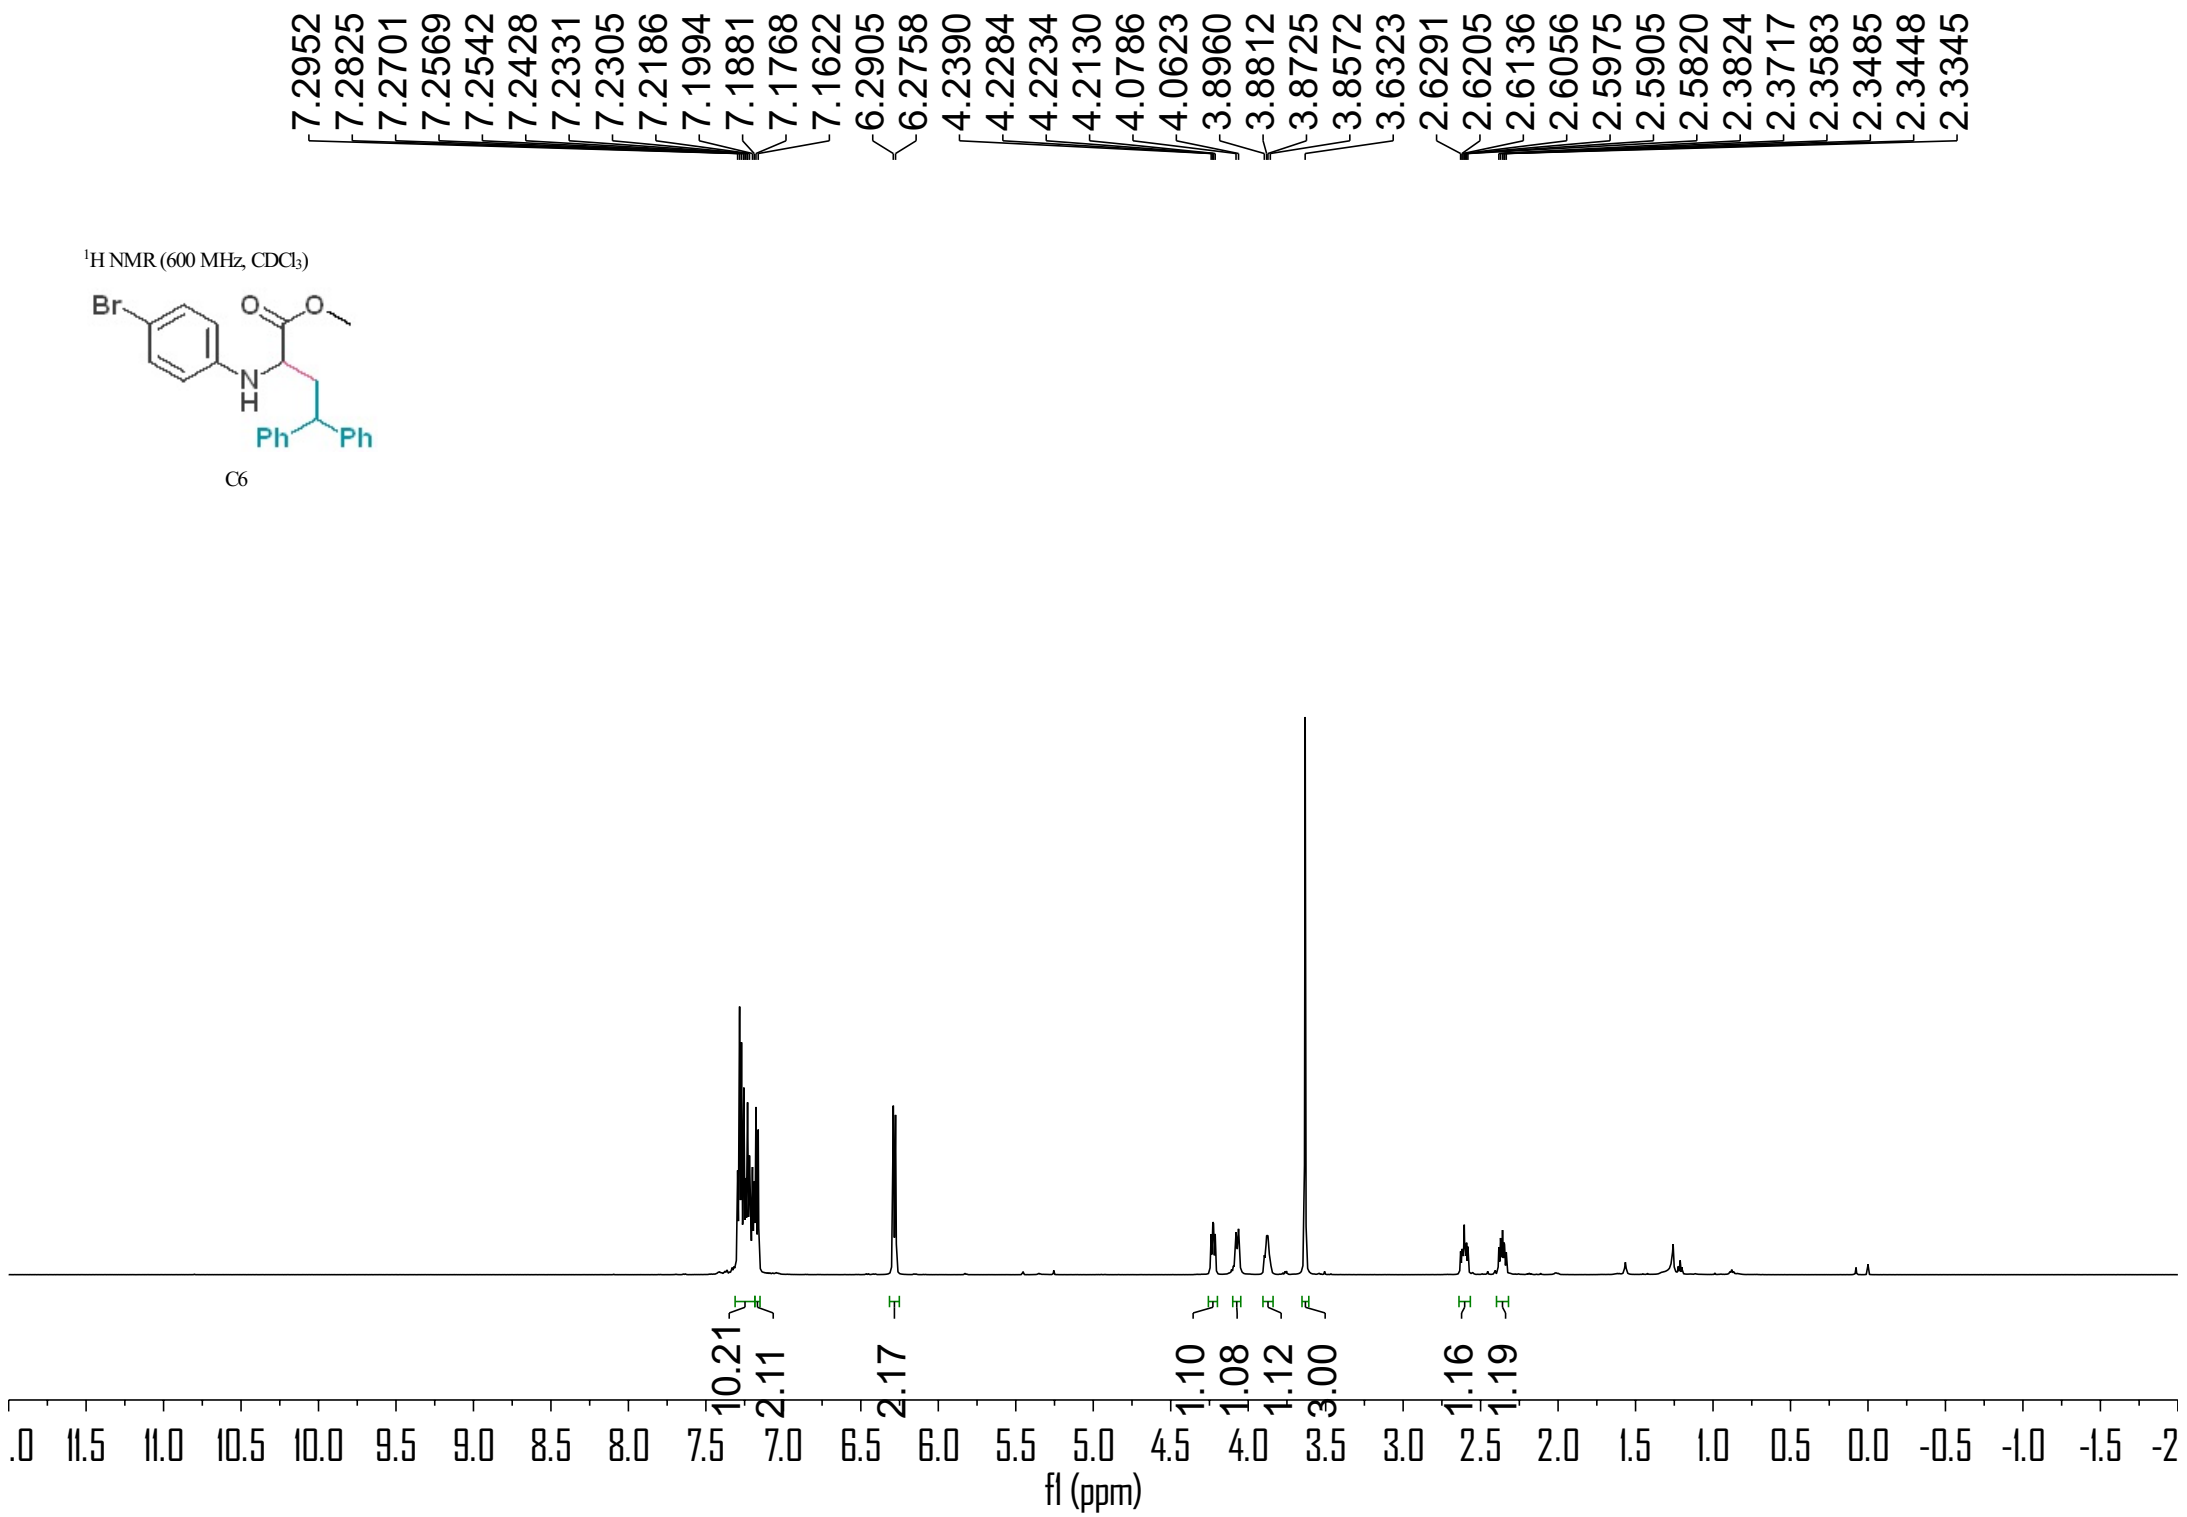



7.3599  
7.3453  
7.3064  
7.2937  
7.2846  
7.2813  
7.2642  
7.2616  
7.2510  
7.2479  
7.2388  
7.2361  
7.2246  
7.2224  
7.2124  
7.2102  
7.2004  
7.1982  
6.2071  
6.1924  
4.2378  
4.2272  
4.2224  
4.2118  
4.0747  
3.8986  
3.8898  
3.8843  
3.8786  
3.6493  
2.6366  
2.6280  
2.6211  
2.6131  
2.6049  
2.5980  
2.5895  
2.3905  
2.3797  
2.3761  
2.3673  
2.3654  
2.3566  
2.3531  
2.3425

<sup>1</sup>H NMR (600 MHz, CDCl<sub>3</sub>)

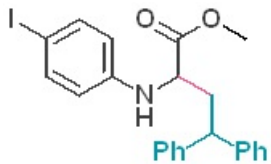

C7

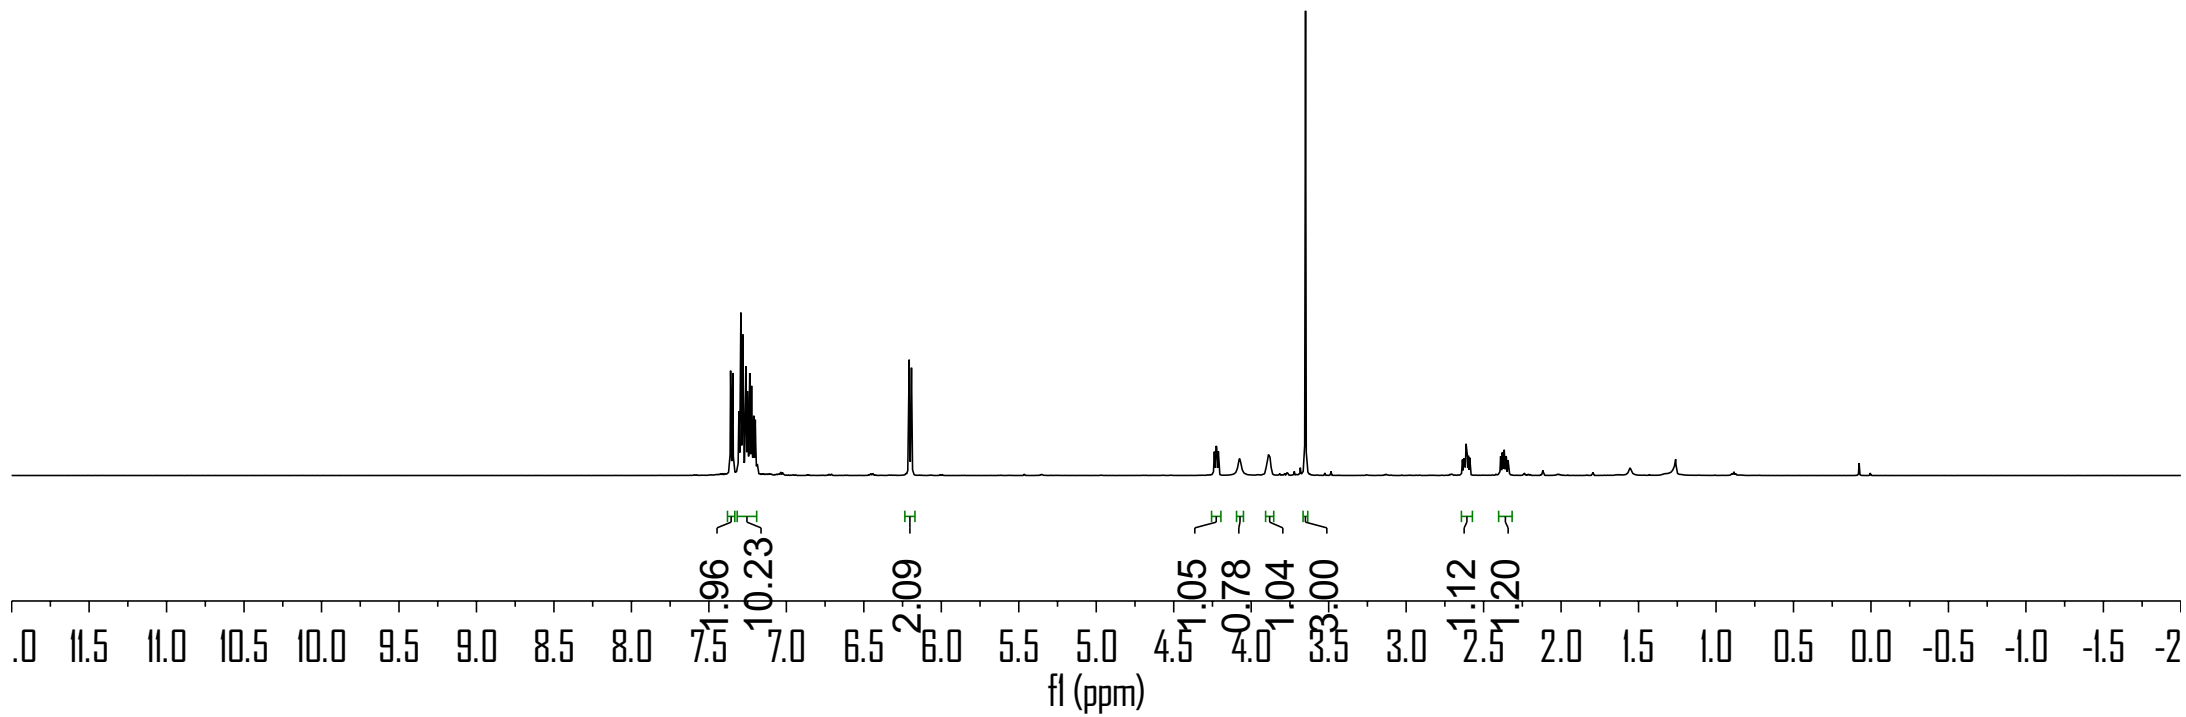

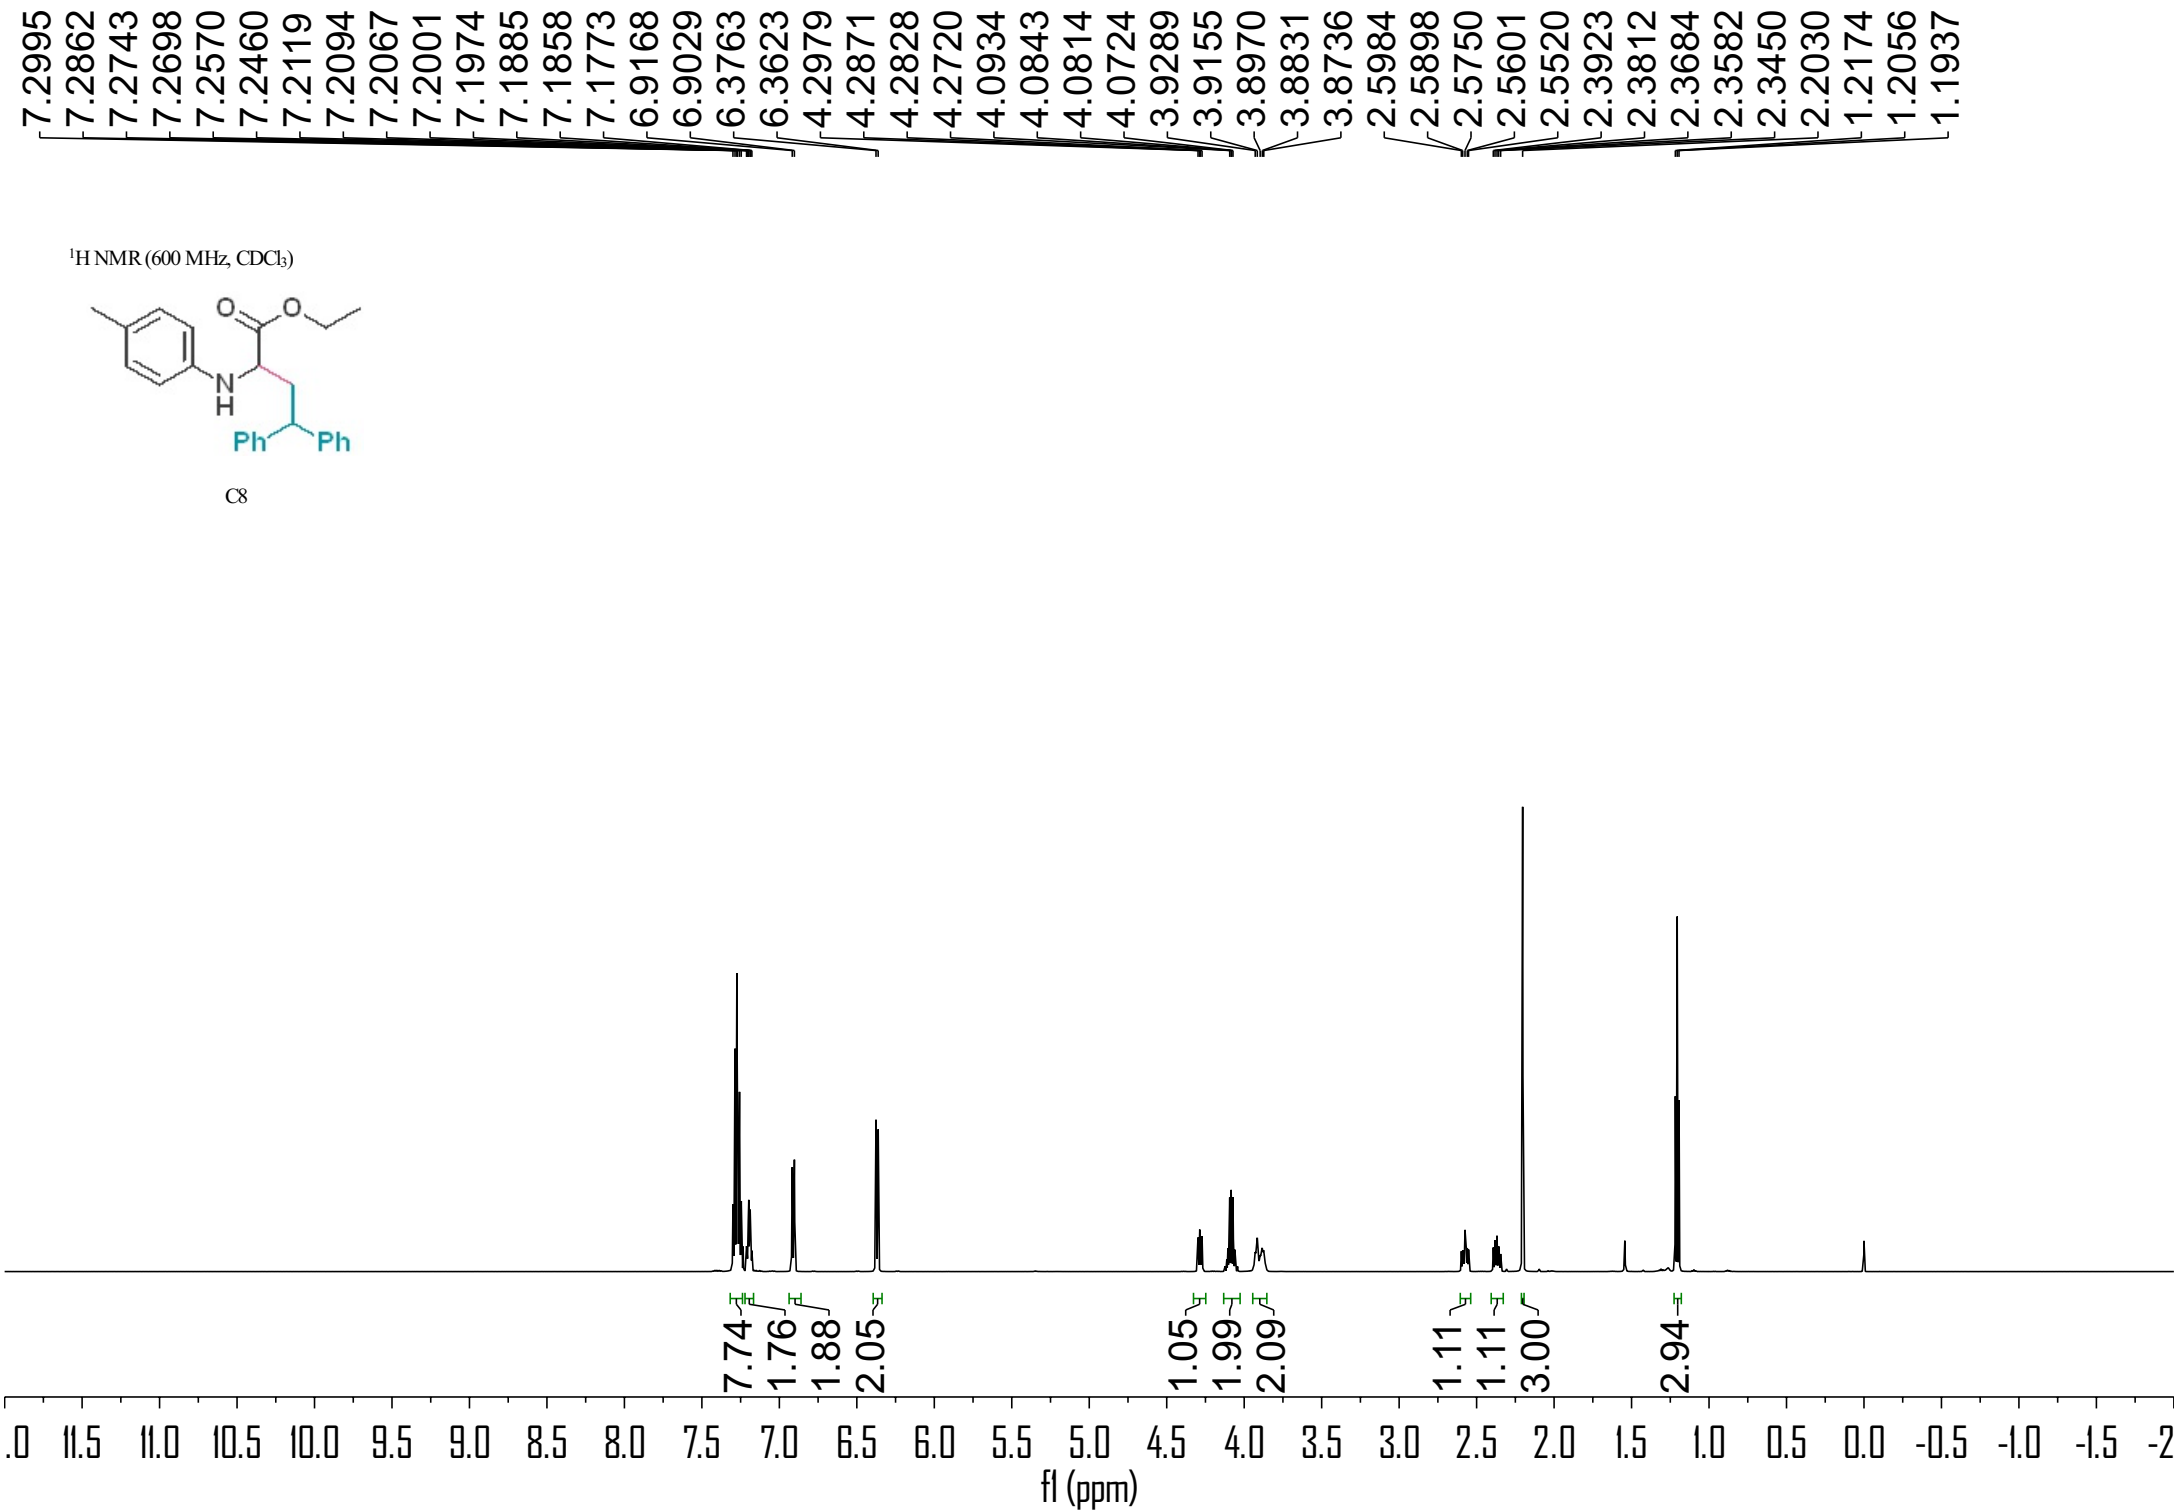

<sup>1</sup>H NMR (400 MHz, CDCl<sub>3</sub>)

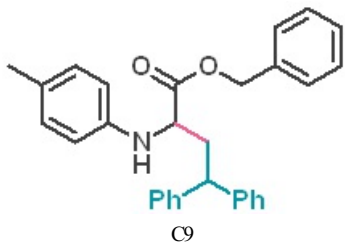

7.3821  
7.3731  
7.3681  
7.3420  
7.3233  
7.3044  
7.2843  
7.2697  
7.2528  
7.2393  
7.2181  
6.9814  
6.9615  
6.4520  
6.4320  
-5.1194  
4.3142  
4.2926  
4.2754  
4.0292  
4.0141  
4.0091  
3.9956  
2.6710  
2.6574  
2.6359  
2.6232  
2.6144  
2.6008  
2.4871  
2.4675  
2.4510  
2.4330  
2.4156  
2.2730

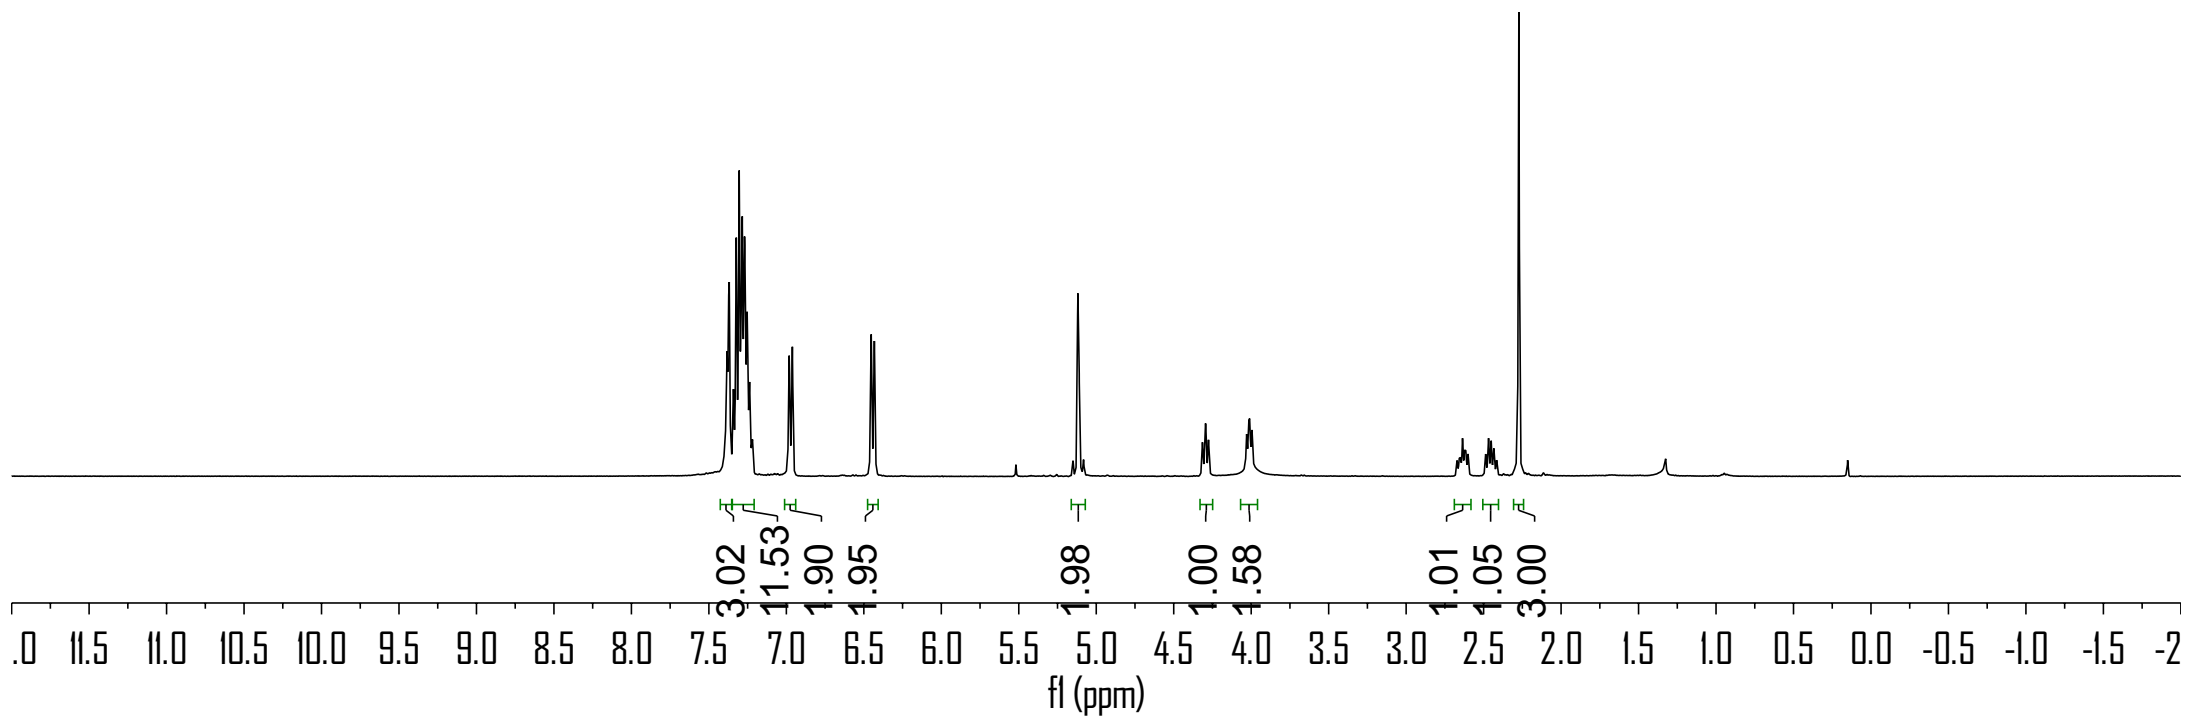

<sup>1</sup>H NMR (400 MHz, CDCl<sub>3</sub>)

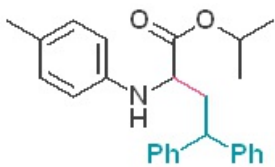

C10

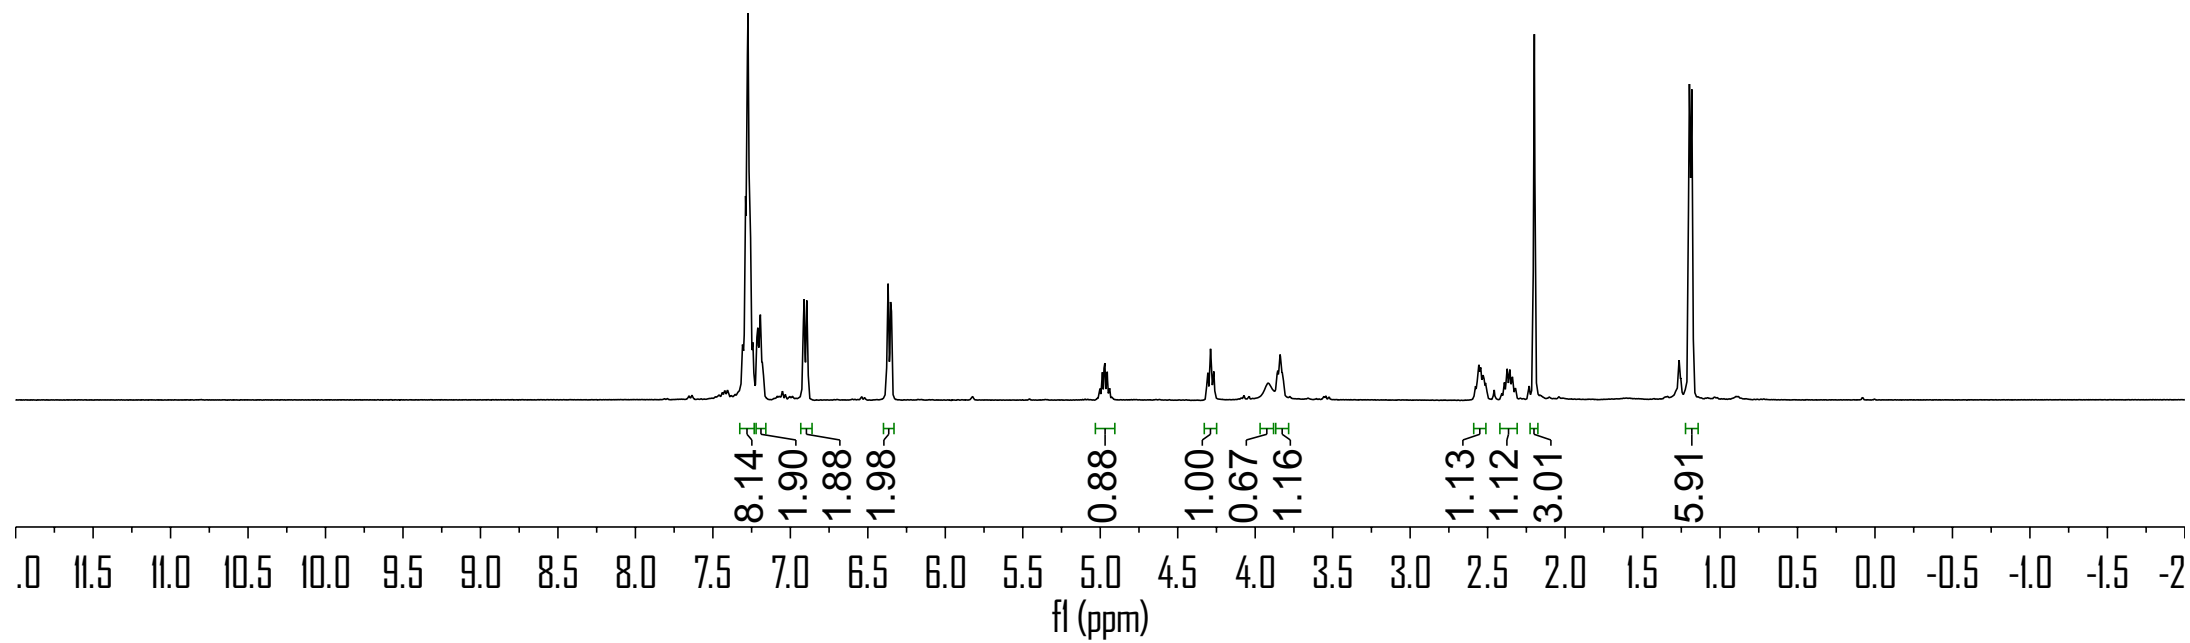

7.3095  
7.2893  
7.2841  
7.2728  
7.2619  
7.2427  
7.2161  
7.2099  
7.1933  
7.1808  
7.1767  
6.9107  
6.8948  
6.3690  
6.3534  
5.0068  
5.0018  
4.9861  
4.9755  
4.9704  
4.9547  
4.9390  
4.3049  
4.2885  
4.2665  
3.9155  
3.8549  
3.8401  
3.8196  
2.5786  
2.5565  
2.5436  
2.5291  
2.5136  
2.5082  
2.4077  
2.3915  
2.3743  
2.3565  
2.3398  
2.3193  
2.1974  
1.1975  
1.1820

7.3157  
7.2966  
7.2793  
7.2739  
7.2591  
7.2545  
7.2425  
7.2208  
7.2162  
7.2032  
7.1993  
7.1826  
6.9149  
6.8949  
6.3656  
6.3448  
4.2837  
2.4176  
2.3951  
2.2030  
2.0862  
1.8081  
1.8033  
1.7768  
1.7658  
1.7461  
1.7326  
1.6178  
1.5826  
1.5588  
1.5419  
1.5218  
1.4906  
1.4862  
1.4676  
1.3524  
1.3460  
1.3233  
1.3165  
1.2954  
1.2860  
1.2659  
1.2565  
1.2352  
1.2246  
0.9969  
0.9769  
0.9619  
0.8533  
0.8423

<sup>1</sup>H NMR (400 MHz, CDCl<sub>3</sub>)

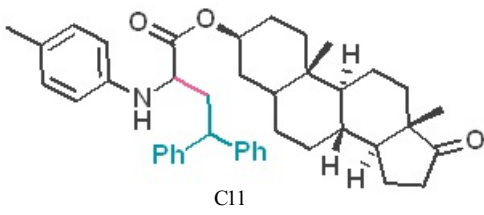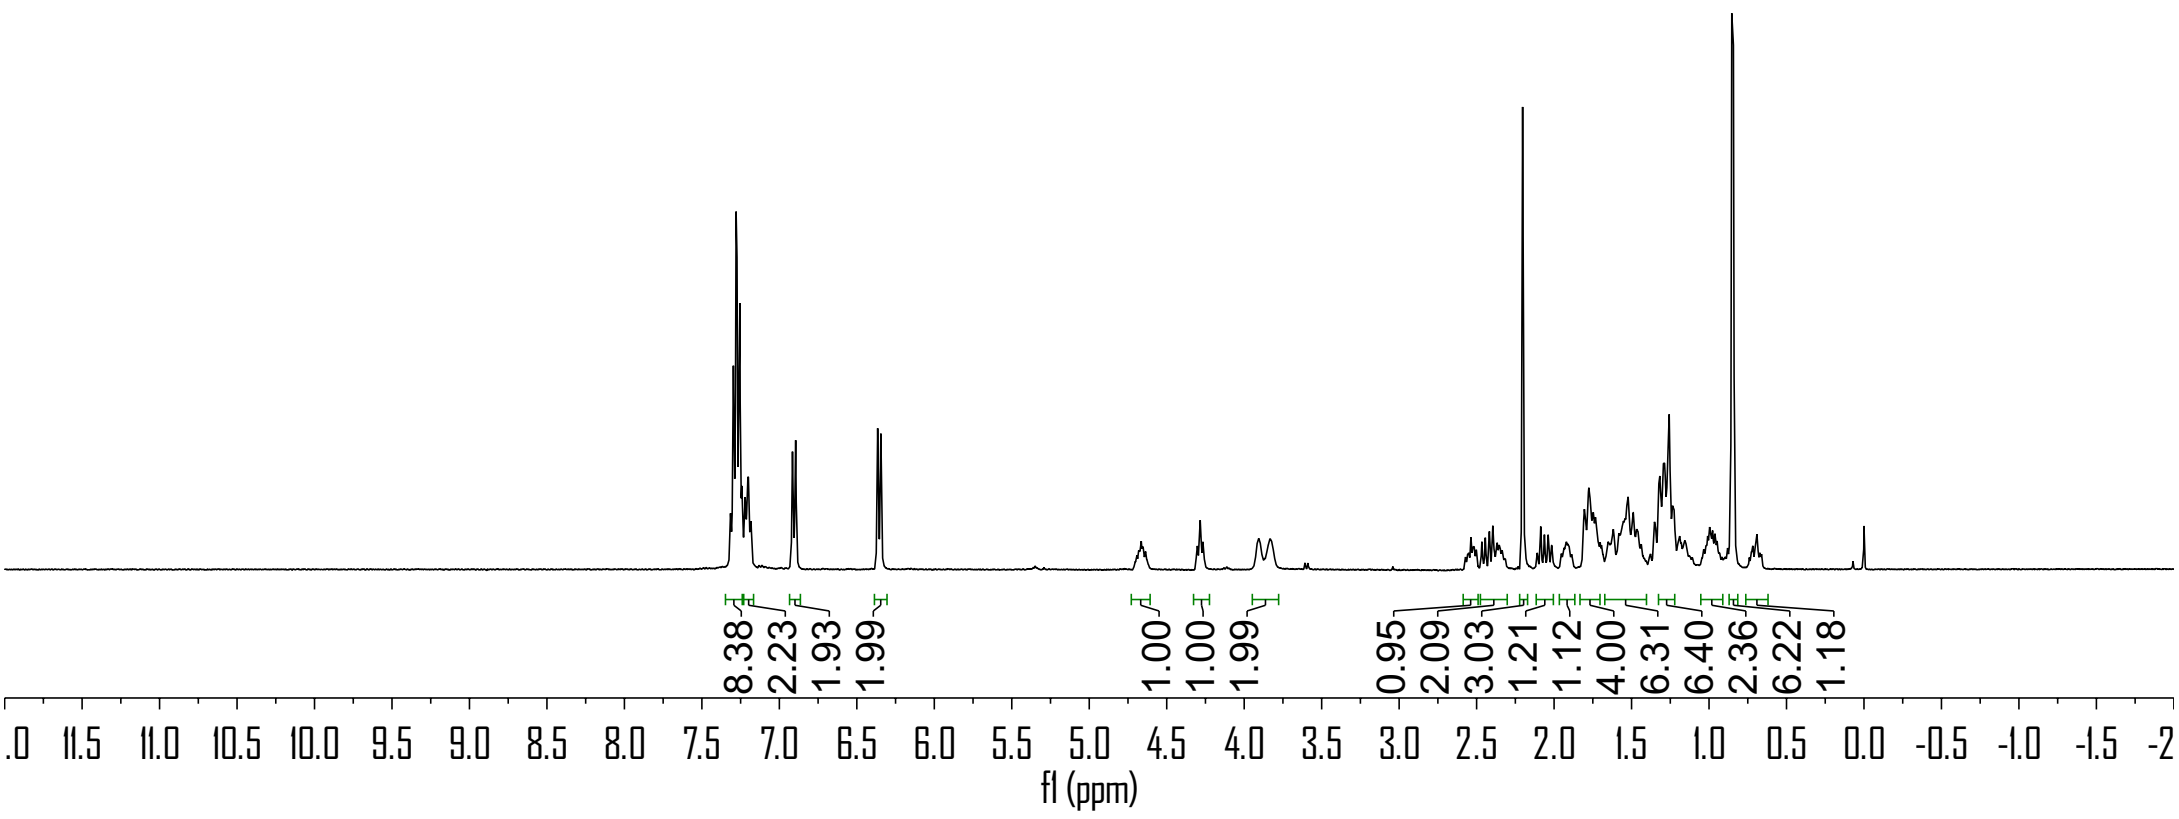

<sup>1</sup>H NMR (600 MHz, CDCl<sub>3</sub>)

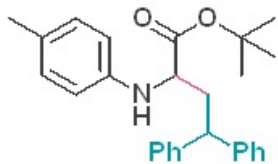

C12

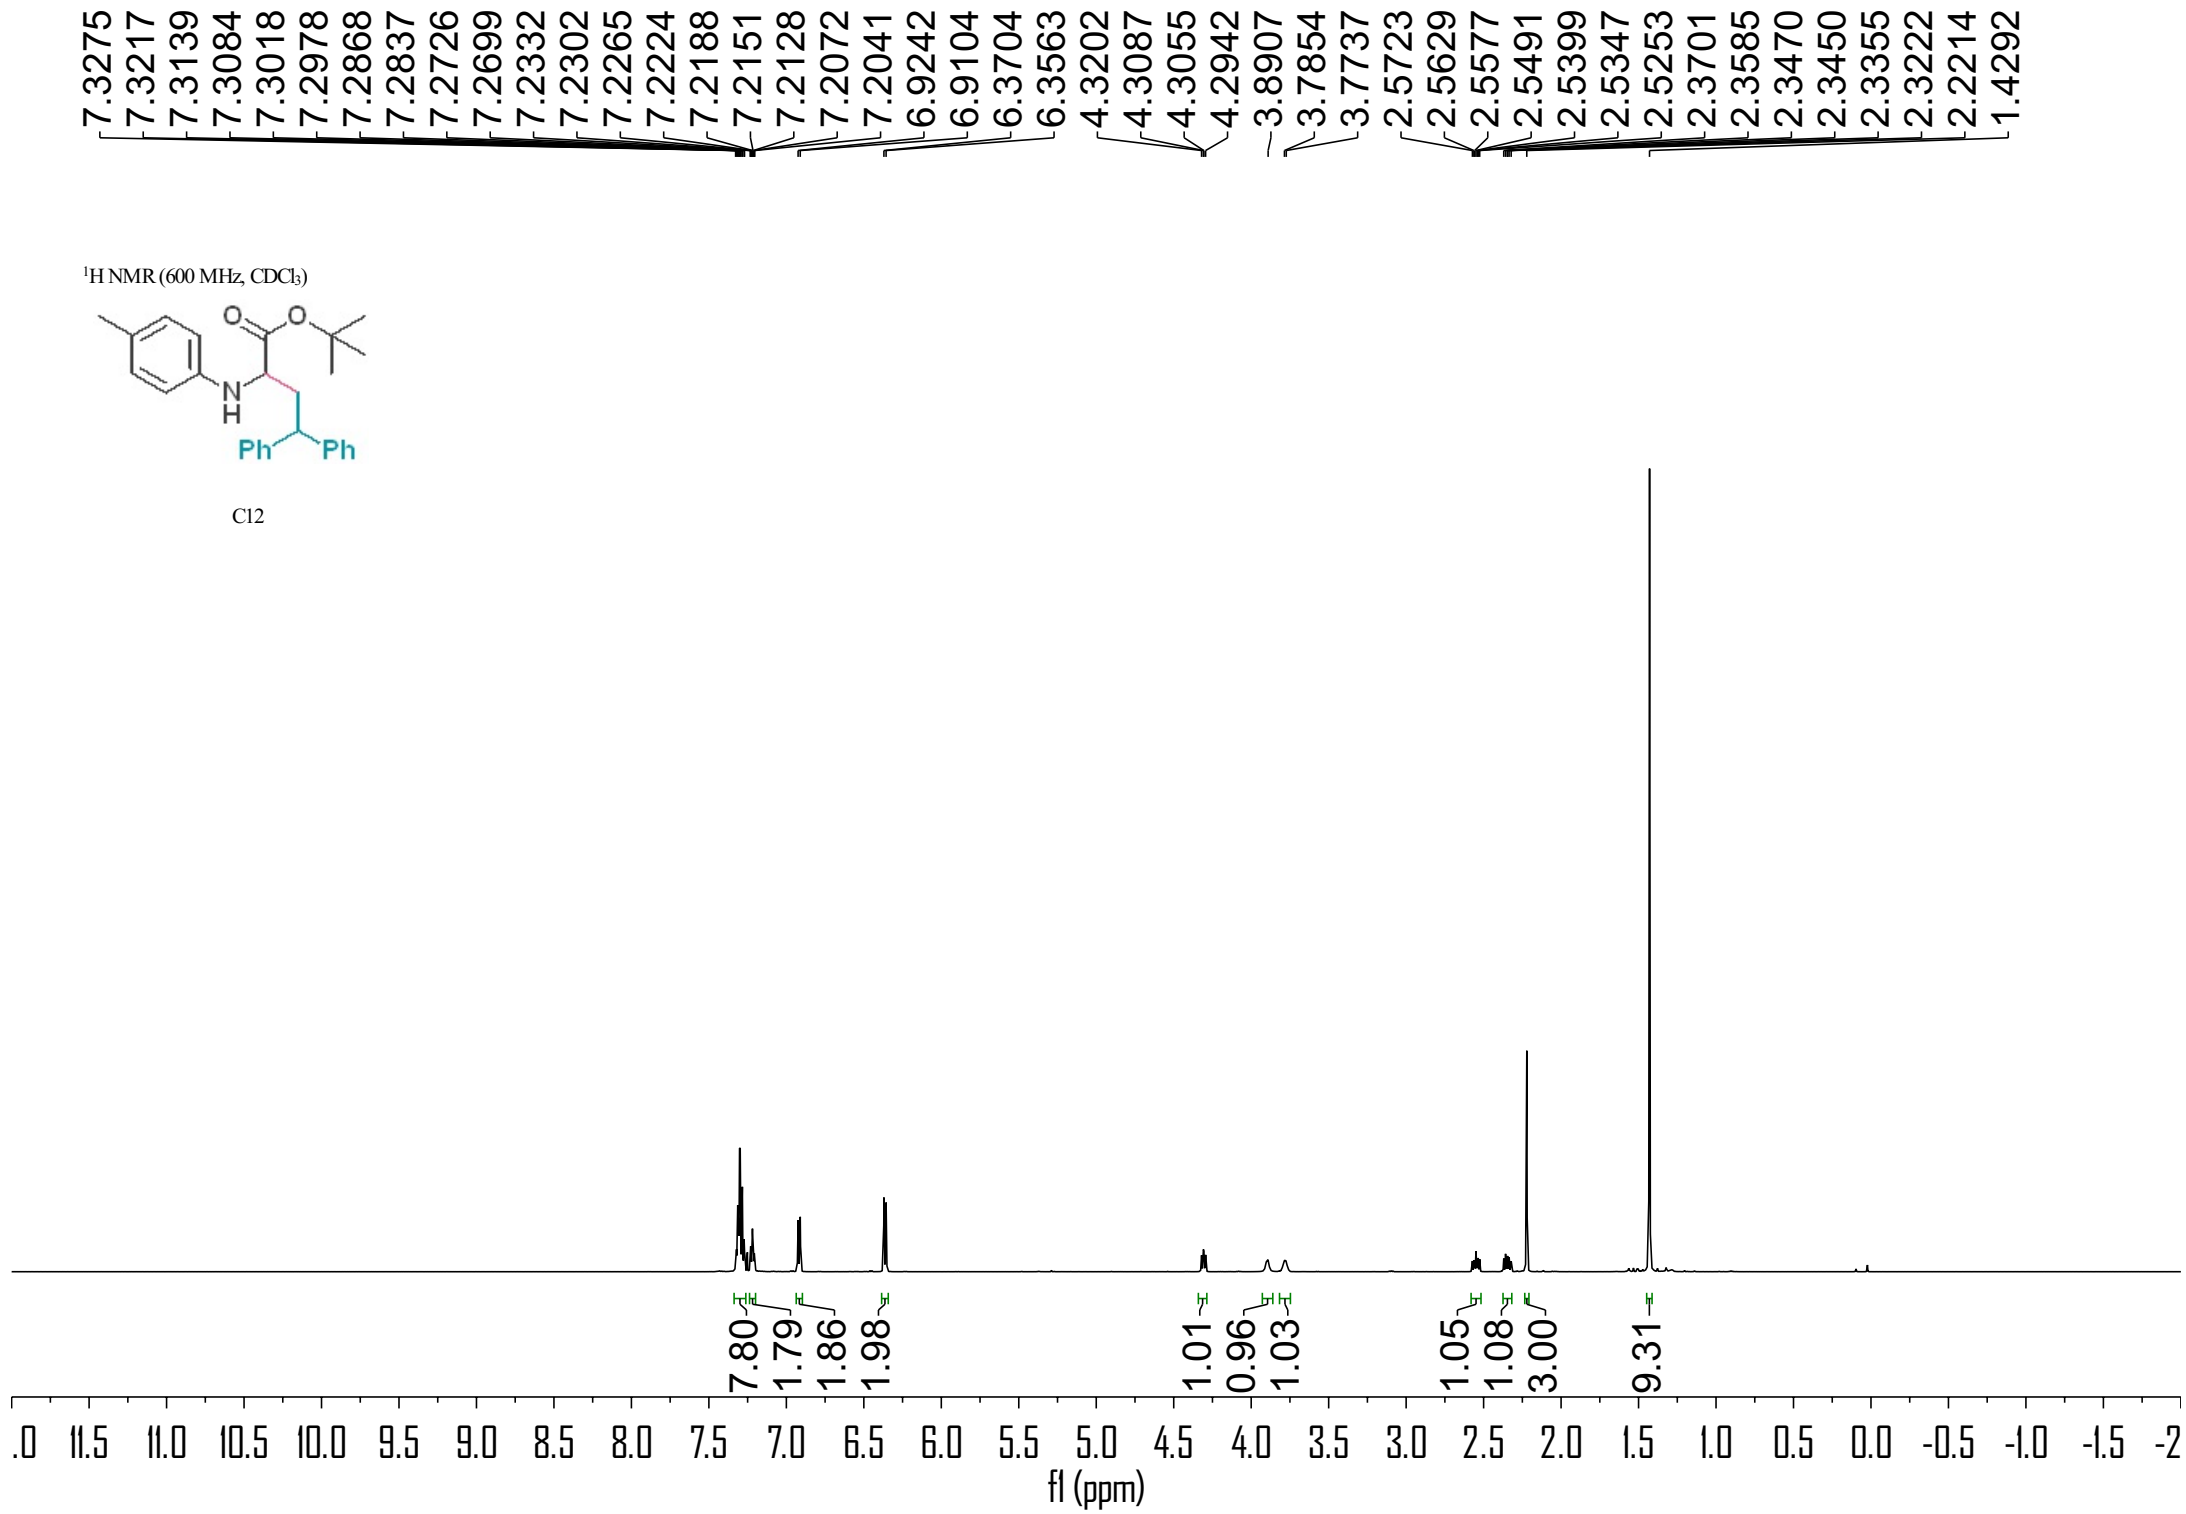

<sup>1</sup>H NMR (400 MHz, CDCl<sub>3</sub>)

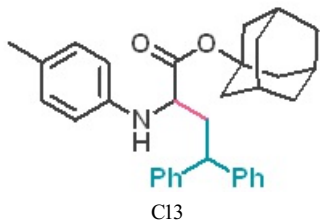

7.3188  
7.3128  
7.2977  
7.2878  
7.2816  
7.2734  
7.2666  
7.2503  
7.2455  
7.2408  
7.2221  
7.2177  
7.2117  
7.2052  
7.1996  
7.1882  
7.1819  
6.9080  
6.8872  
6.3452  
6.3241  
4.3146  
4.2967  
4.2760  
3.9086  
3.7607  
3.7458  
3.7265  
2.5615  
2.5467  
2.5397  
2.5265  
2.5125  
2.5055  
2.4911  
2.3652  
2.3589  
2.3403  
2.3218  
2.3059  
2.2871  
2.2018  
2.1412  
2.0684  
1.6366

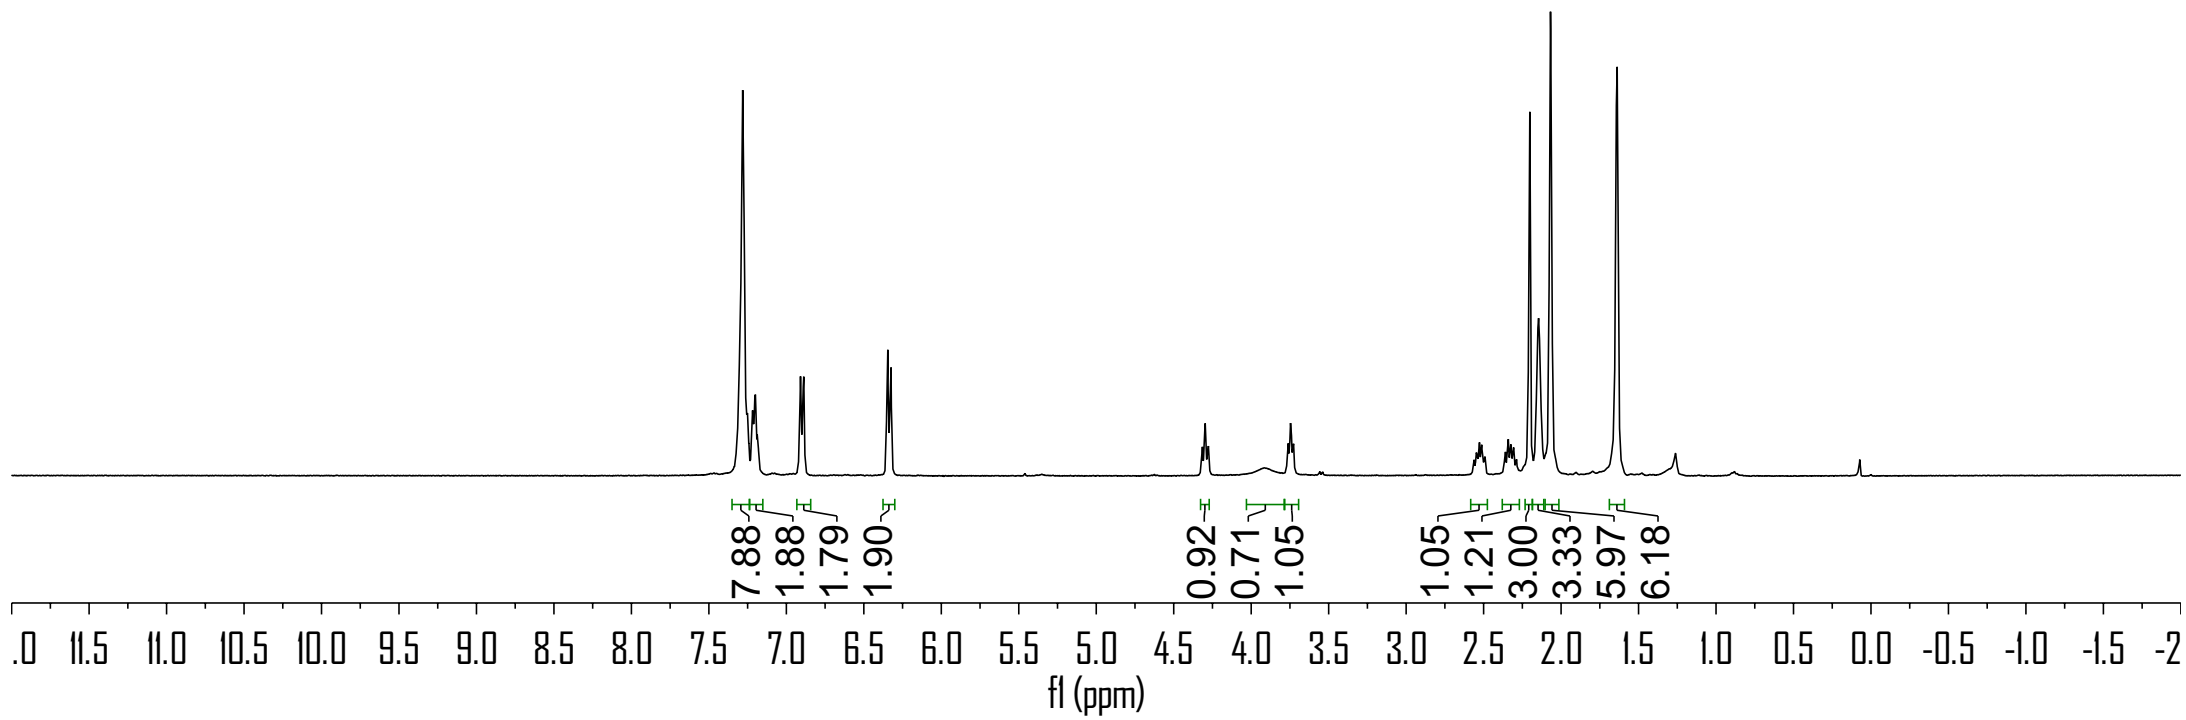

7.2986  
7.2902  
7.2754  
7.2605  
7.2491  
7.2329  
7.2143  
7.2087  
7.2034  
7.1941  
7.1869  
7.1721  
7.0424  
7.0241  
6.9882  
6.9698  
6.9509  
6.6720  
6.6536  
6.6351  
6.2492  
6.2291  
4.2837  
4.2672  
4.2616  
4.2452  
4.0484  
4.0352  
4.0282  
4.0147  
3.6278  
2.6897  
2.6764  
2.6675  
2.6548  
2.6421  
2.6331  
2.6200  
2.5070  
2.4901  
2.4698  
2.4555  
2.4358  
2.1307

<sup>1</sup>H NMR (400 MHz, CDCl<sub>3</sub>)

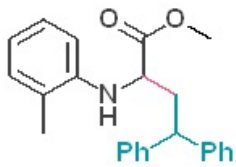

C14

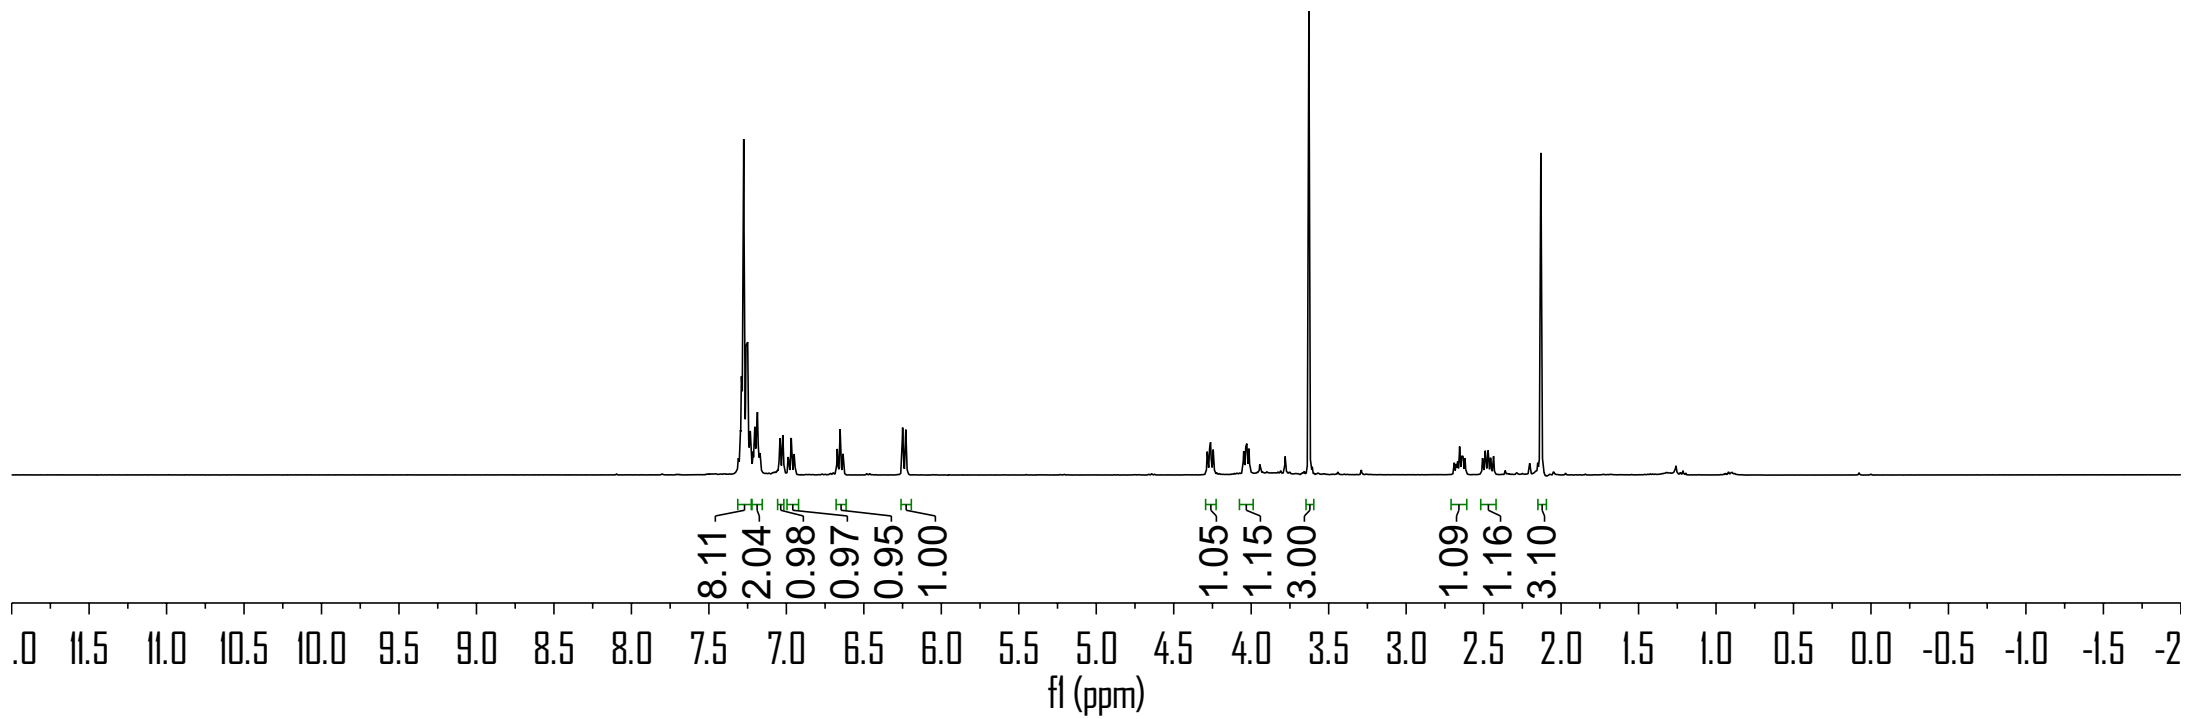



<sup>1</sup>H NMR (400 MHz, CDCl<sub>3</sub>)

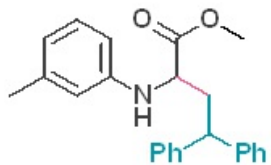

C15

7.3122  
7.2943  
7.2902  
7.2740  
7.2681  
7.2595  
7.2404  
7.2252  
7.2212  
7.2038  
7.1906  
7.1828  
7.0117  
6.9929  
6.9740  
6.5498  
6.5312  
6.2612  
6.2427  
4.2873  
4.2712  
4.2641  
4.2484  
3.9988  
3.9501  
3.9338  
3.6389  
2.6367  
2.6242  
2.6137  
2.6017  
2.5901  
2.5791  
2.5673  
2.4031  
2.3871  
2.3672  
2.3526  
2.3325  
2.2025

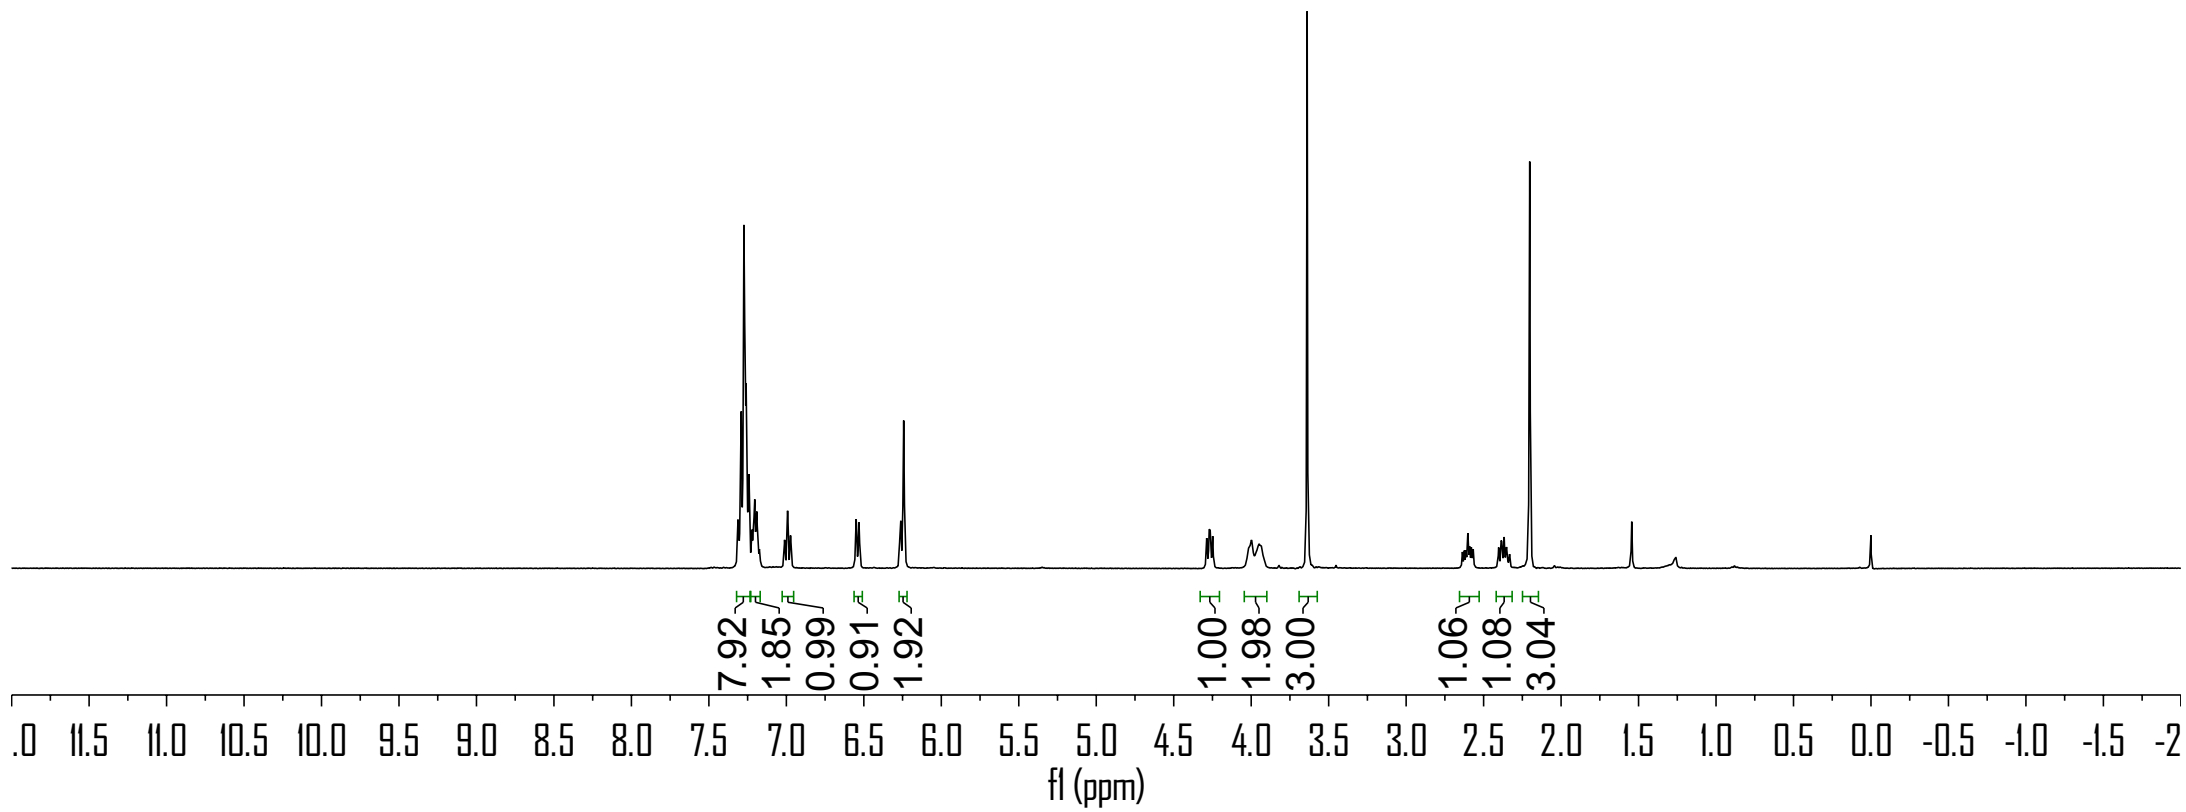

7.2993  
7.2871  
7.2713  
7.2552  
7.2520  
7.2414  
7.2133  
7.2109  
7.2011  
7.1923  
7.1899  
7.1868  
7.1781  
7.1213  
7.1189  
7.1154  
7.1067  
7.0947  
7.0922  
7.0889  
6.7303  
6.7178  
6.7059  
6.4518  
4.4392  
4.2771  
4.2661  
4.2576  
4.0454  
3.9512  
3.6261  
2.6341  
2.6253  
2.6171  
2.6104  
2.6069  
2.6023  
2.5873  
2.4142  
2.4082  
2.4004  
2.3974  
2.3893  
2.3774  
2.3744  
2.3603

<sup>1</sup>H NMR (600 MHz, CDCl<sub>3</sub>)

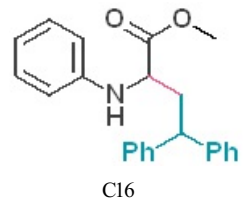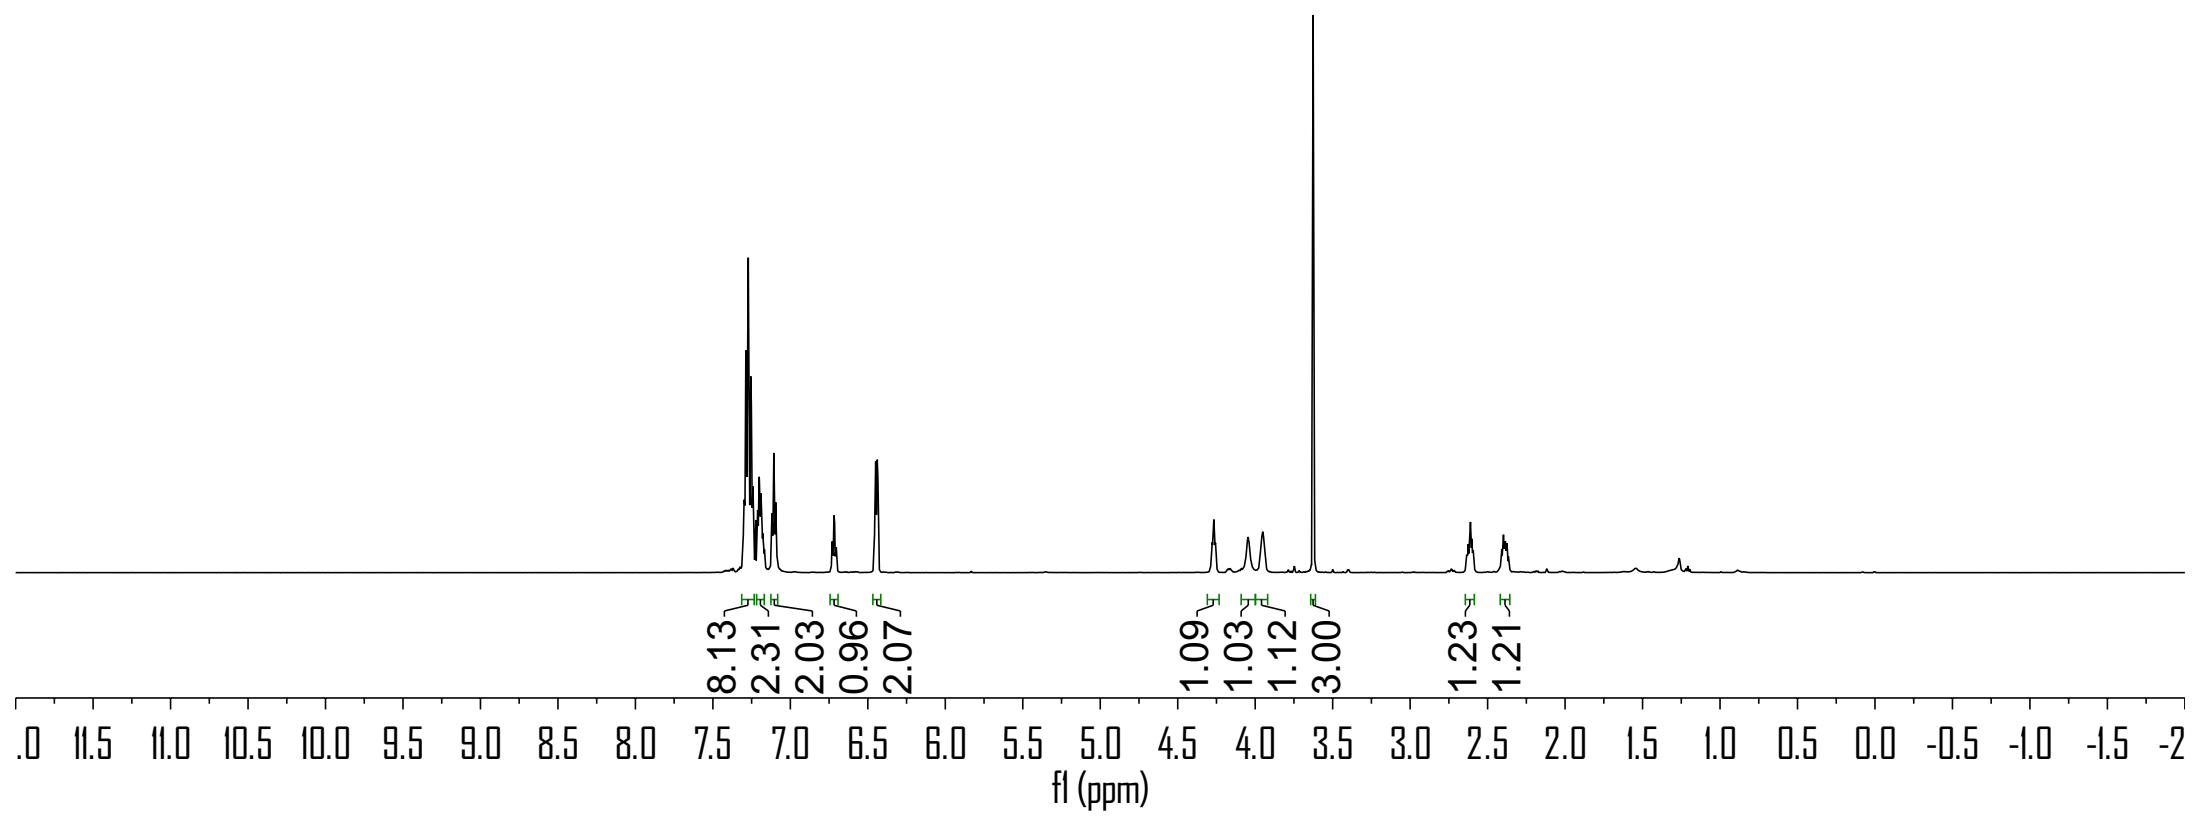

<sup>1</sup>H NMR (400 MHz, CDCl<sub>3</sub>)

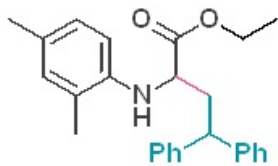

C17

7.3278  
7.3124  
7.3049  
7.2895  
7.2724  
7.2664  
7.2398  
7.2232  
7.2145  
7.2025  
7.1960  
7.1806  
7.1738  
6.8600  
6.8467  
6.2590  
6.2185  
6.1995

4.3066  
4.2905  
4.2744  
4.1155  
4.1060  
4.0948  
4.0884  
4.0770  
4.0706  
4.0669  
4.0593  
4.0501  
3.8833  
3.8759  
3.8626  
2.5818  
2.5695  
2.5478  
2.5261  
2.3690  
2.3530  
2.3348  
2.3180  
2.1058  
1.2351  
1.2175  
1.1007

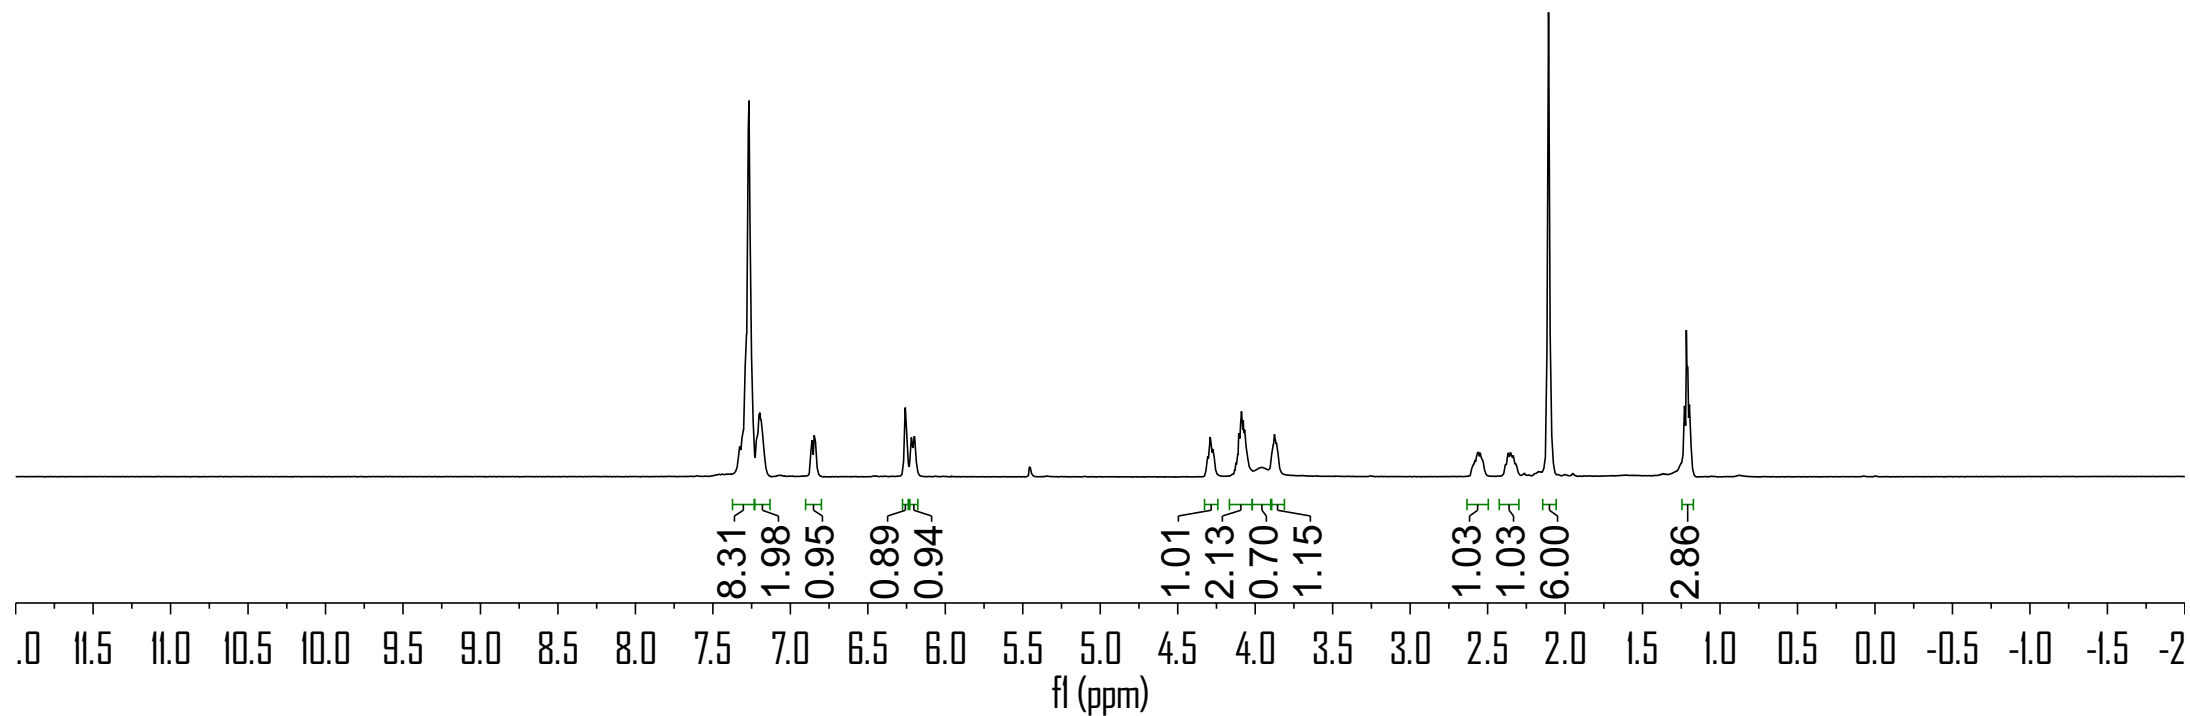

<sup>1</sup>H NMR (400 MHz, CDCl<sub>3</sub>)

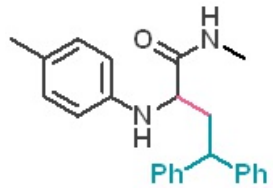

C18

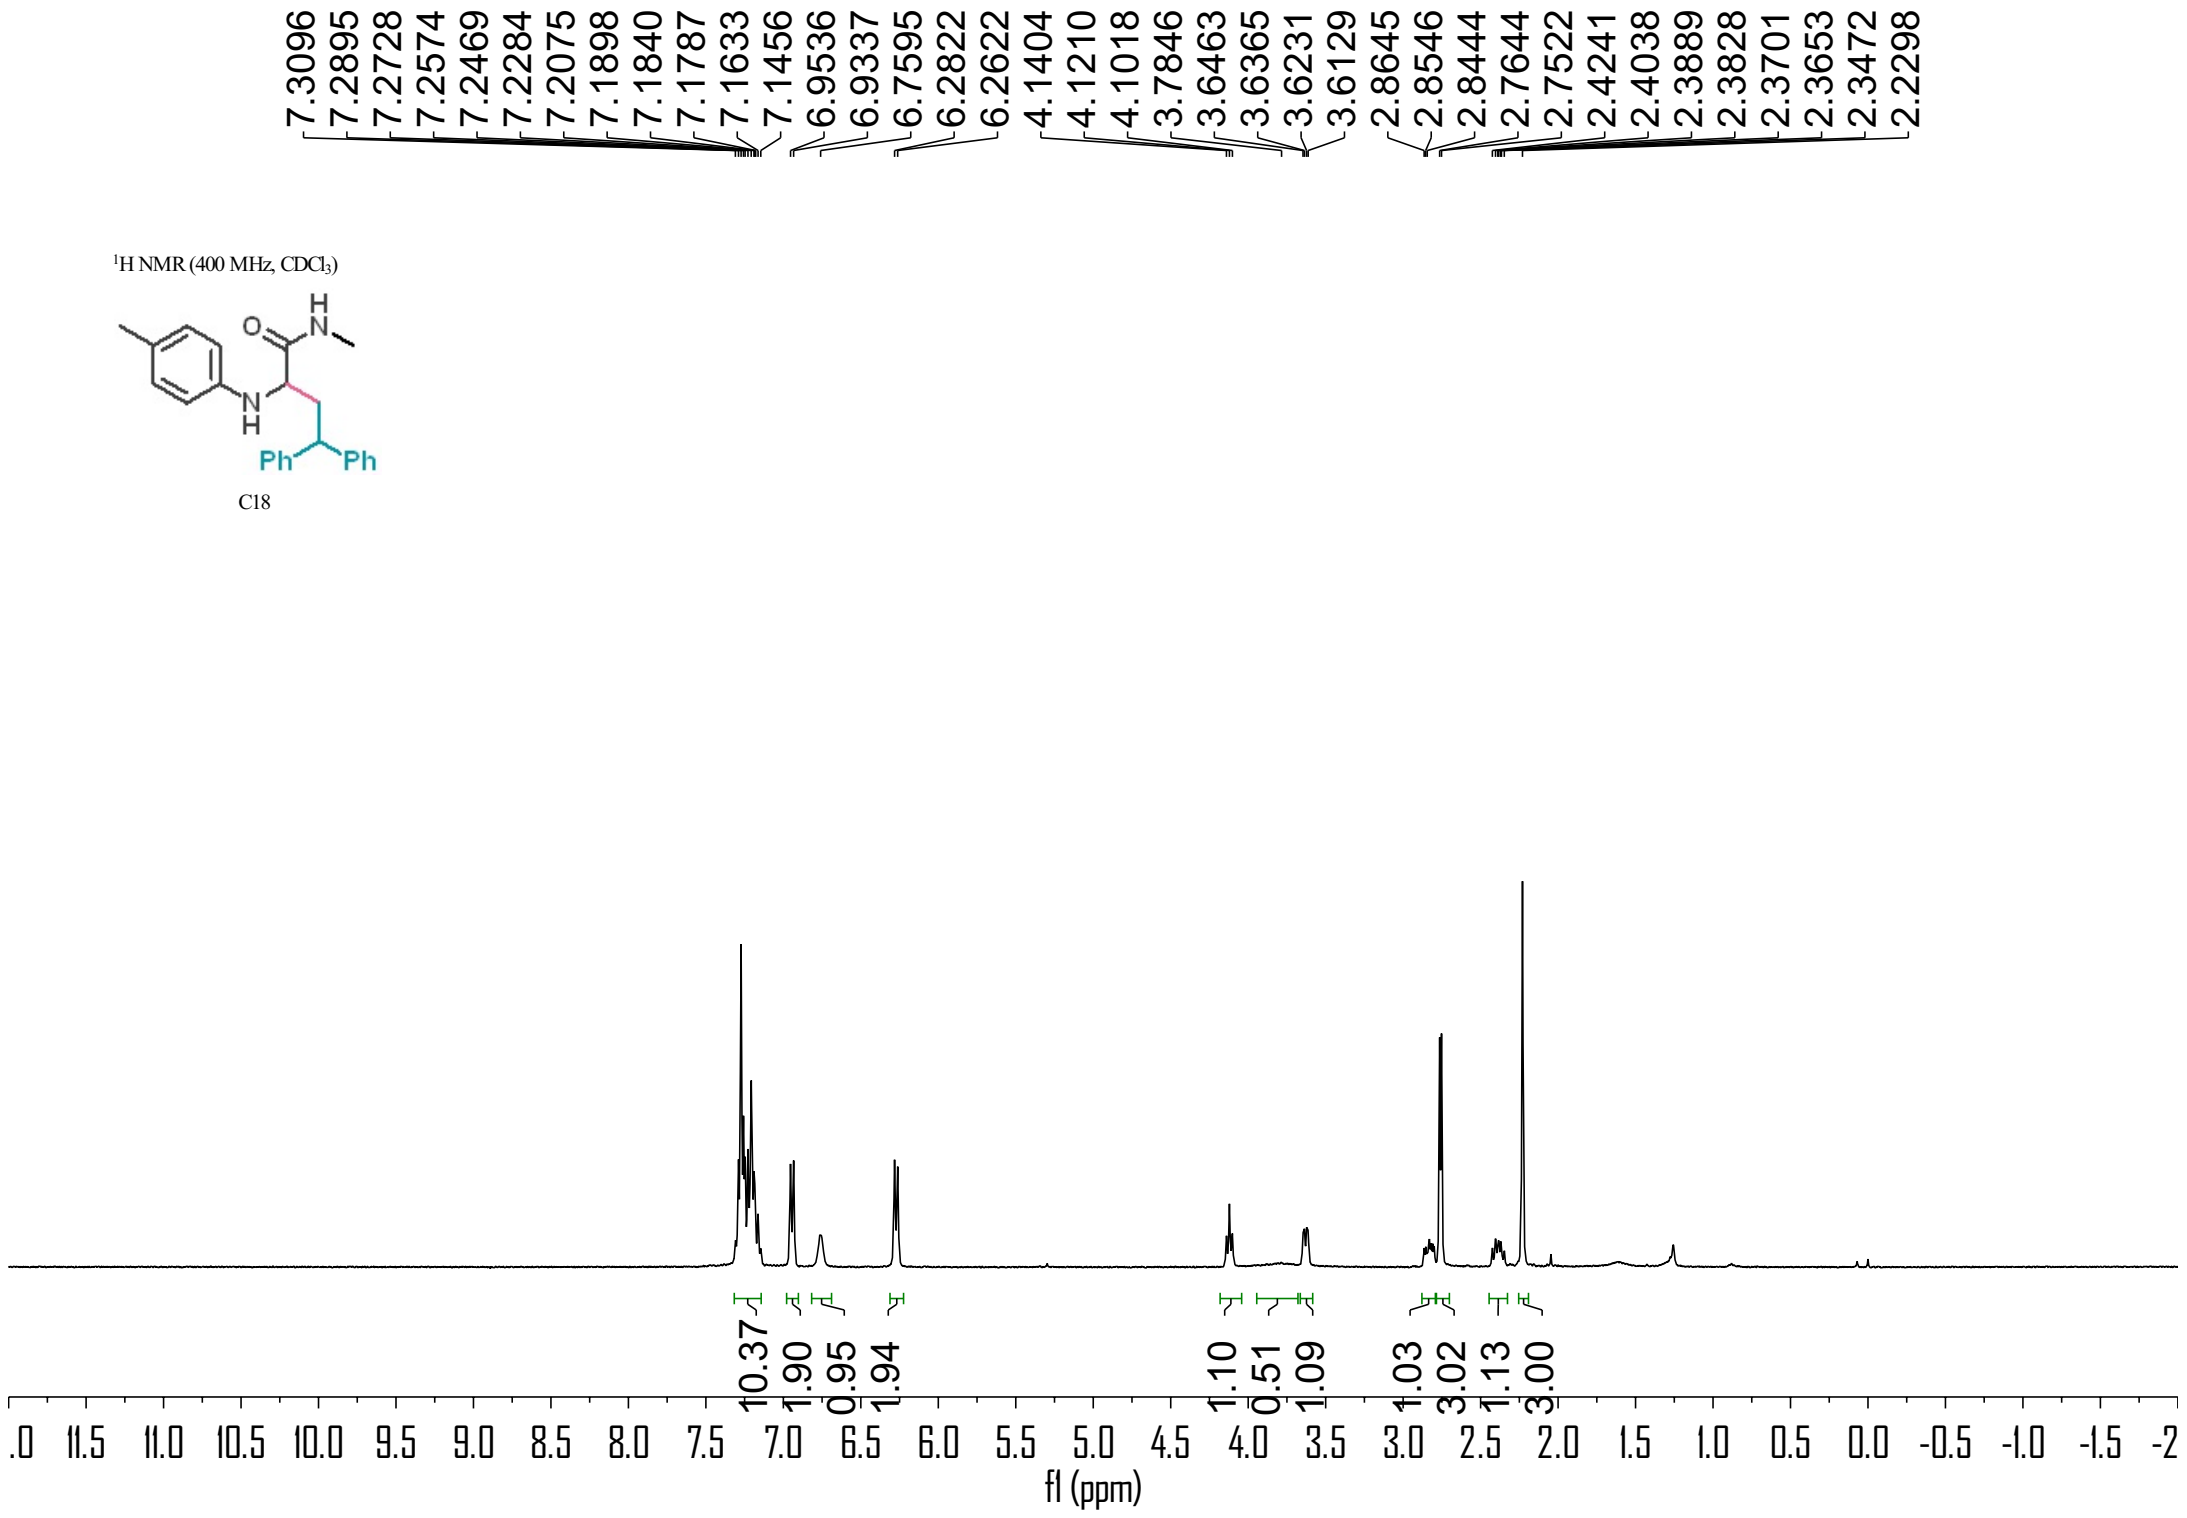

<sup>1</sup>H NMR (400 MHz, CDCl<sub>3</sub>)

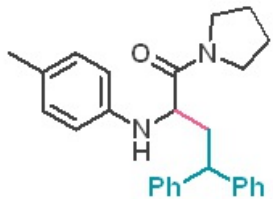

C19

7.3350  
7.3117  
7.3079  
7.2879  
7.2723  
7.2573  
7.2179  
7.2041  
7.1879  
7.1740  
7.1673  
6.9340  
6.9130  
6.4146  
6.3936  
4.3078  
4.2912  
4.2698  
4.2195  
3.9197  
3.9056  
3.8867  
3.4063  
3.3873  
3.3644  
3.3460  
3.0766  
3.0556  
3.0376  
2.8912  
2.8717  
2.8499  
2.3964  
2.3801  
2.3601  
2.2111  
1.7816  
1.7678  
1.7498  
1.7313  
1.7121

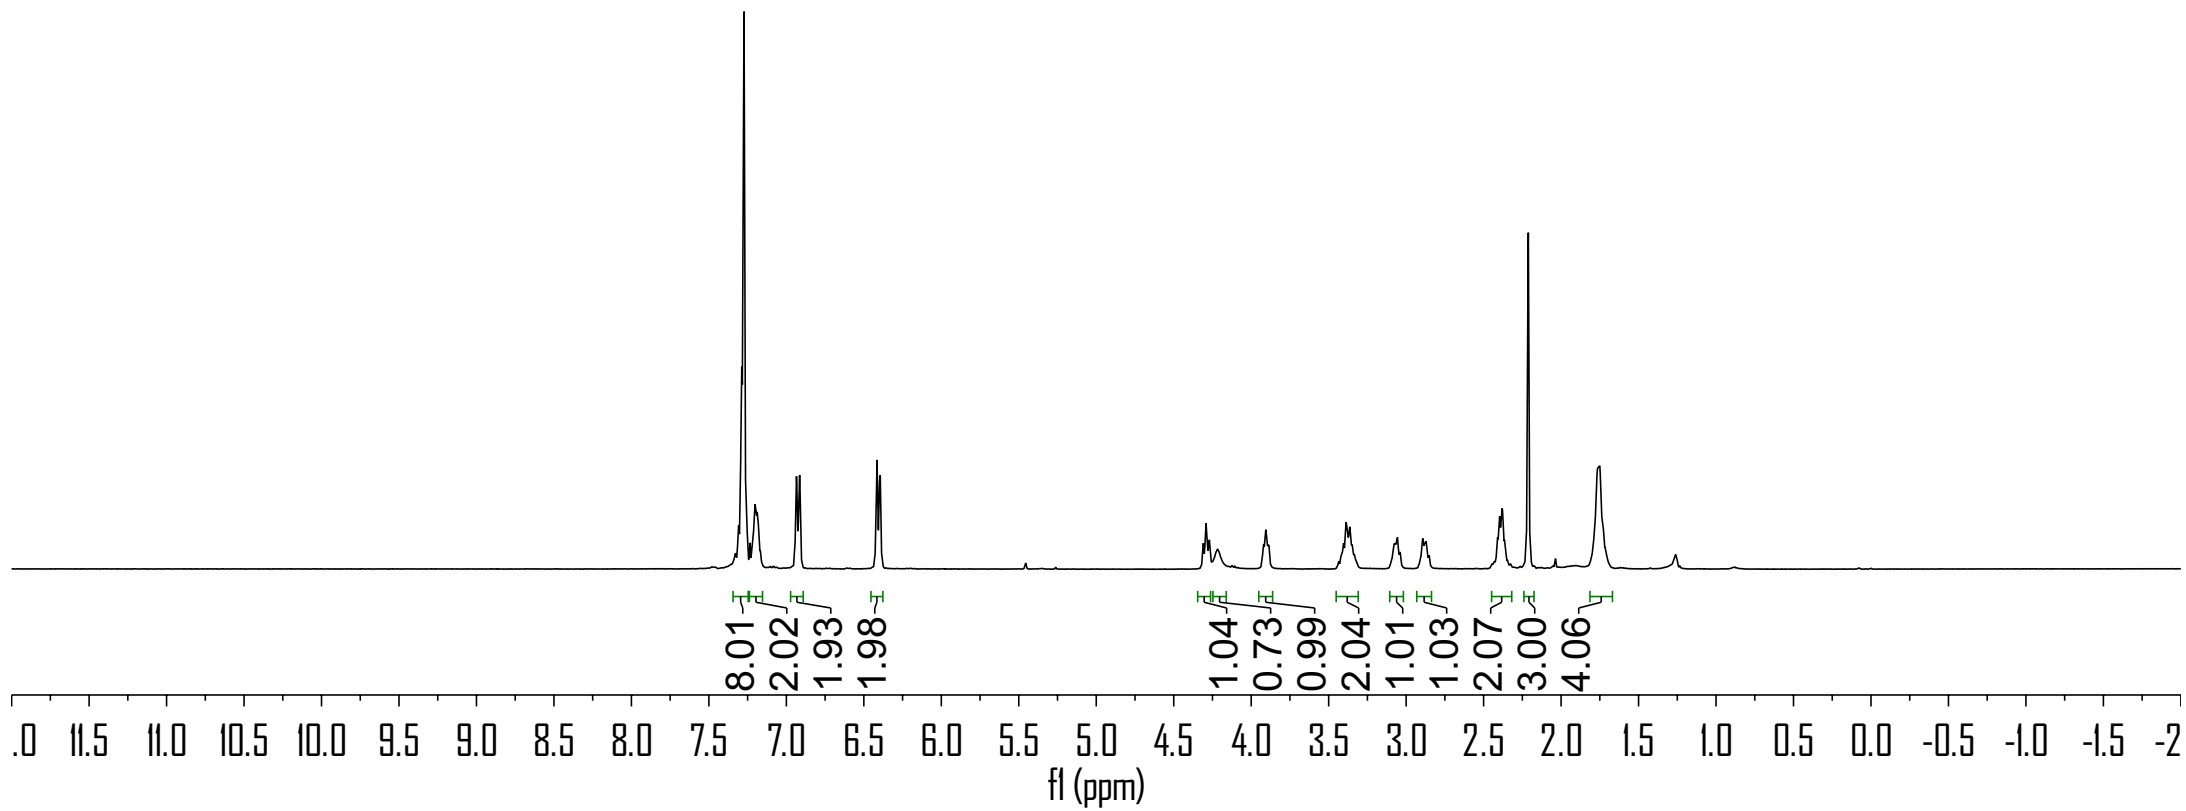

7.2840  
7.2707  
7.2613  
7.2470  
7.2339  
7.2219  
7.2101  
7.1990  
7.1905  
7.1809  
7.1690  
7.1661  
7.1544  
7.1427  
6.9369  
6.9226  
6.3068  
6.2926  
4.1747  
4.1658  
4.1538  
4.1489  
4.1420  
4.1301  
4.0703  
4.0598  
4.0400  
4.0295  
3.8641  
3.8557  
3.8339  
3.8254  
3.7066  
3.6799  
3.6708  
2.8273  
2.8198  
2.8106  
2.8039  
2.7963  
2.7895  
2.4452  
2.4305  
2.4189  
2.4069  
2.3953  
2.2151  
1.2369  
1.2250  
1.2131

<sup>1</sup>H NMR (600 MHz, CDCl<sub>3</sub>)

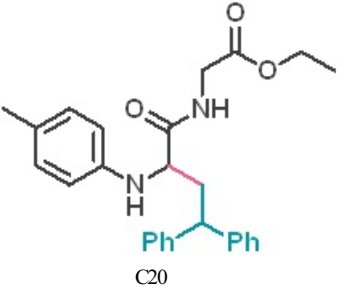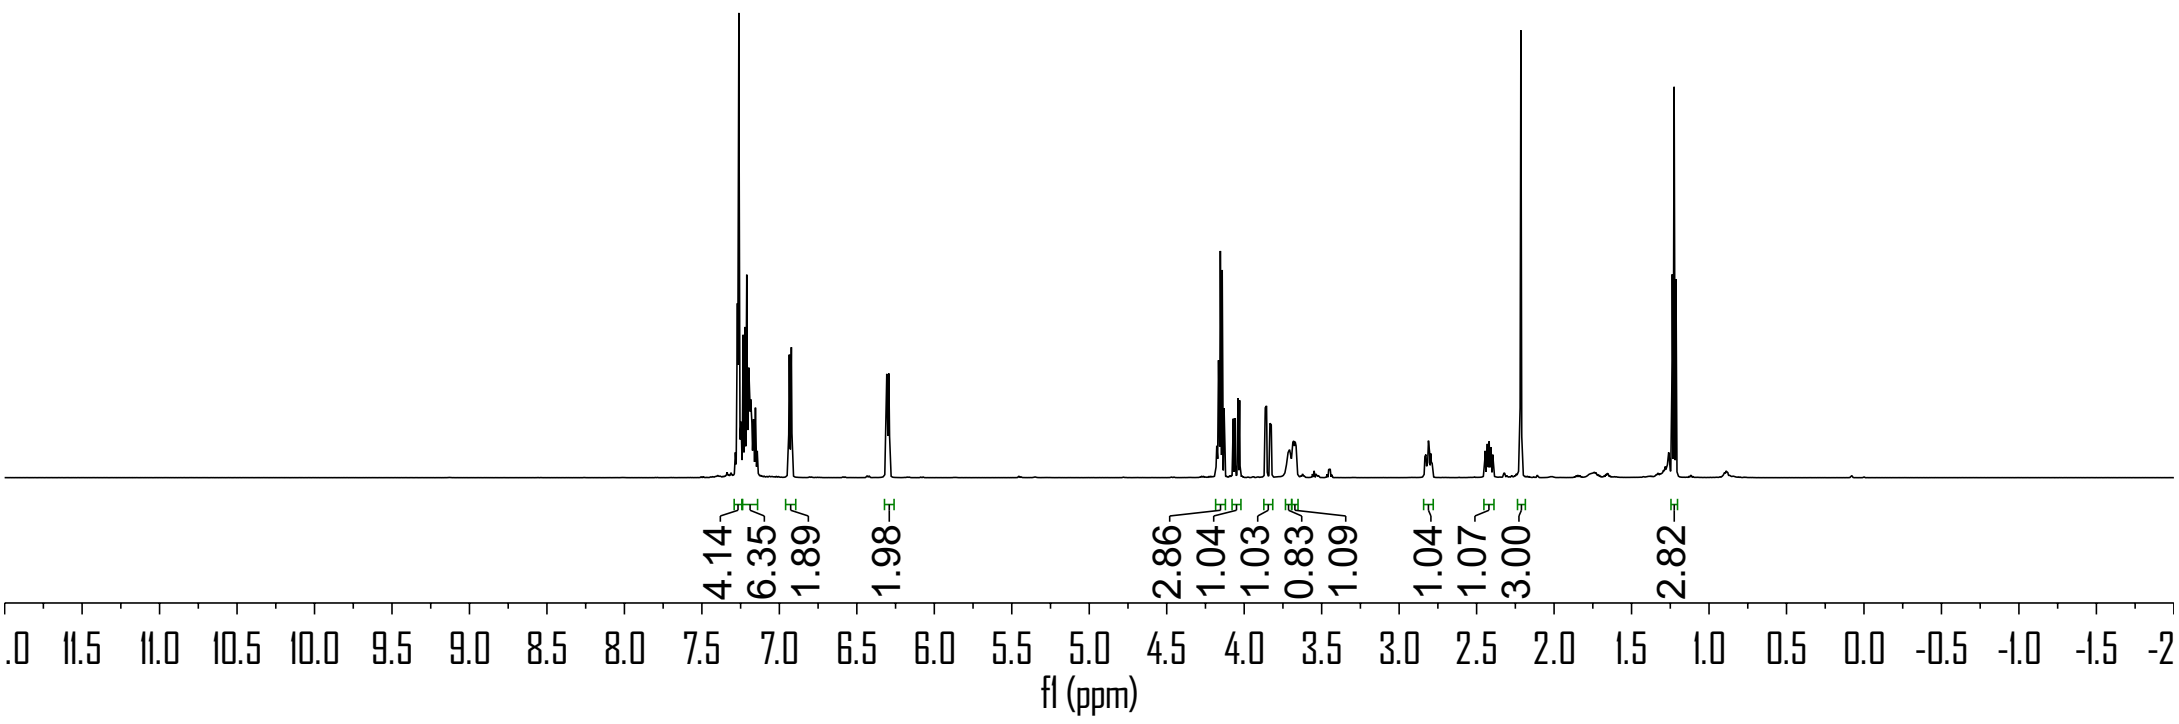

7.2930  
7.2880  
7.2833  
7.2764  
7.2661  
7.2580  
7.2549  
7.2450  
7.2332  
7.2237  
7.2109  
7.1999  
7.1856  
7.1751  
7.1634  
6.9317  
6.9171  
6.3411  
6.3272  
6.3024  
6.2885  
4.4992  
4.4917  
4.4838  
4.1855  
4.1736  
4.1697  
4.1617  
4.1578  
4.1519  
4.1460  
4.0919  
4.0801  
3.6797  
3.6728  
2.2140  
1.2653  
1.2534  
1.2416  
1.1608  
1.1489  
1.1371  
0.8999  
0.8885  
0.8451  
0.8336  
0.8097  
0.7983  
0.7014  
0.6900

<sup>1</sup>H NMR (600 MHz, CDCl<sub>3</sub>)

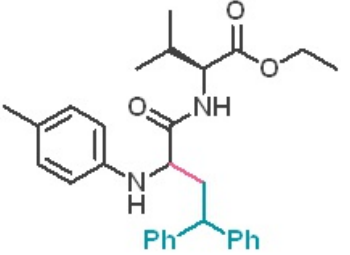

C21 (dr = 1.2:1)

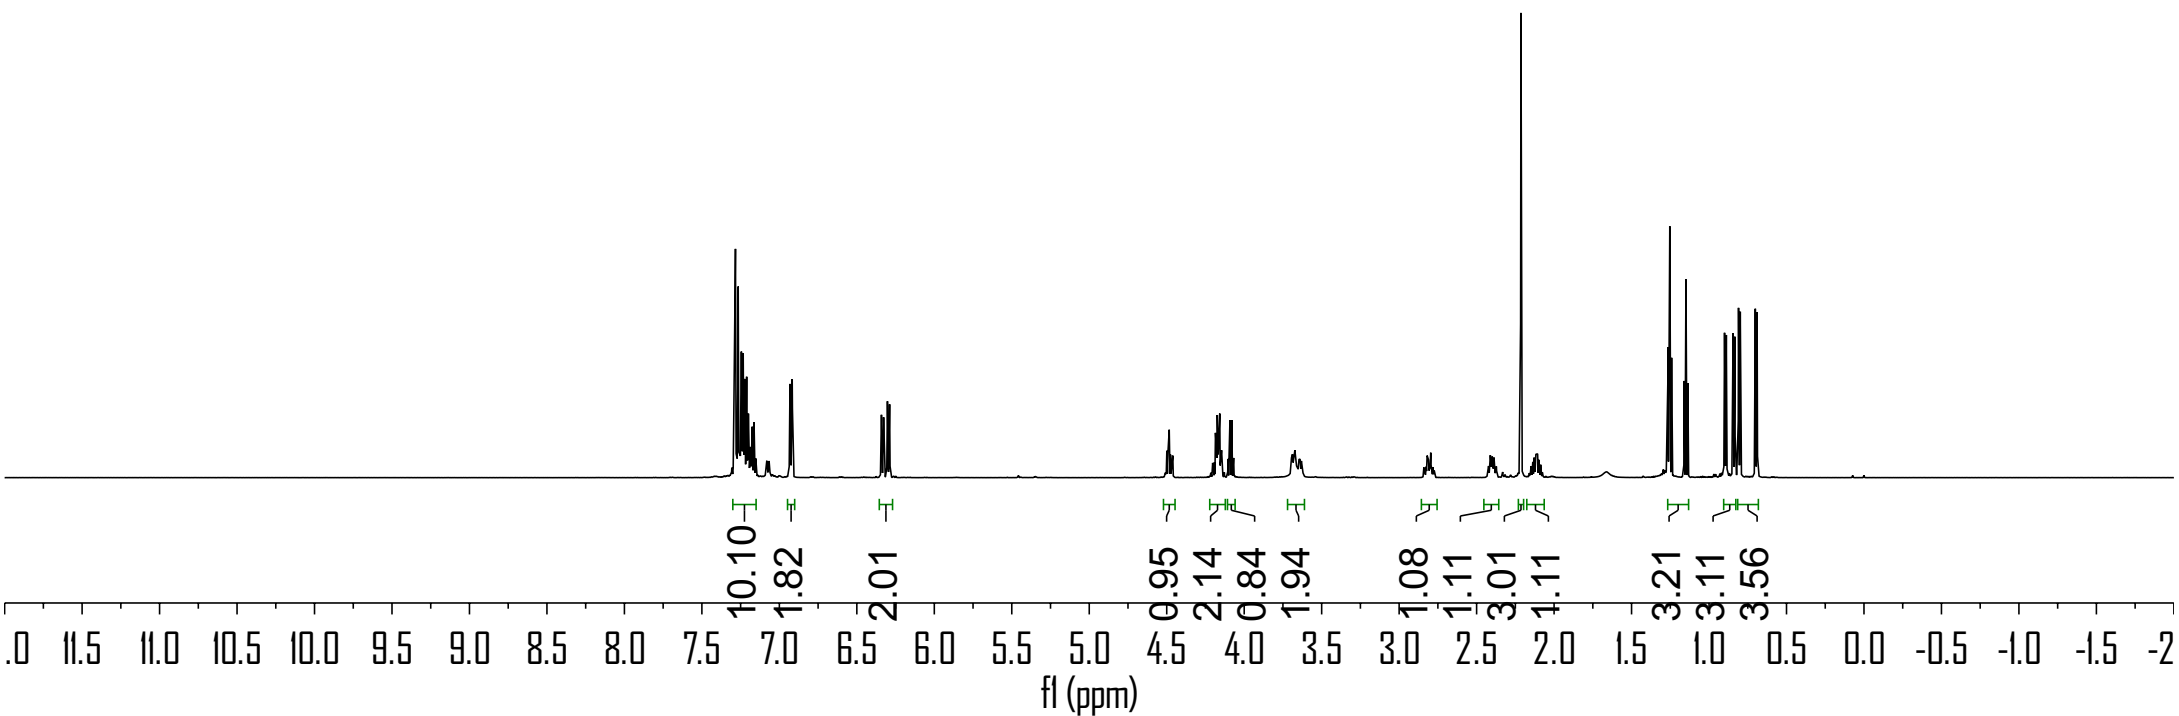

7.7139  
7.6949  
7.5206  
7.5024  
7.3243  
7.3062  
7.2929  
7.2749  
7.2581  
7.2373  
7.2209  
7.2082  
7.1908  
7.1707  
7.1624  
7.1541  
7.1426  
6.9548  
6.9348  
6.8999  
6.8798  
6.3649  
6.3440  
6.2570  
6.2361  
5.5323  
5.5120  
5.4926  
4.1917  
4.1737  
4.1556  
4.1378  
4.1200  
4.1029  
4.0855  
3.6998  
3.6886  
3.6673  
3.6491  
3.6386  
2.4202  
2.4017  
2.2360  
2.2232  
1.2010  
1.1832  
1.1653  
1.1614  
1.1437  
1.1259

<sup>1</sup>H NMR (400 MHz, CDCl<sub>3</sub>)

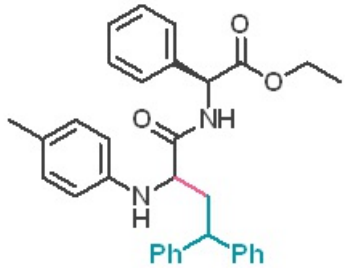

C22 (dr = 1:1)

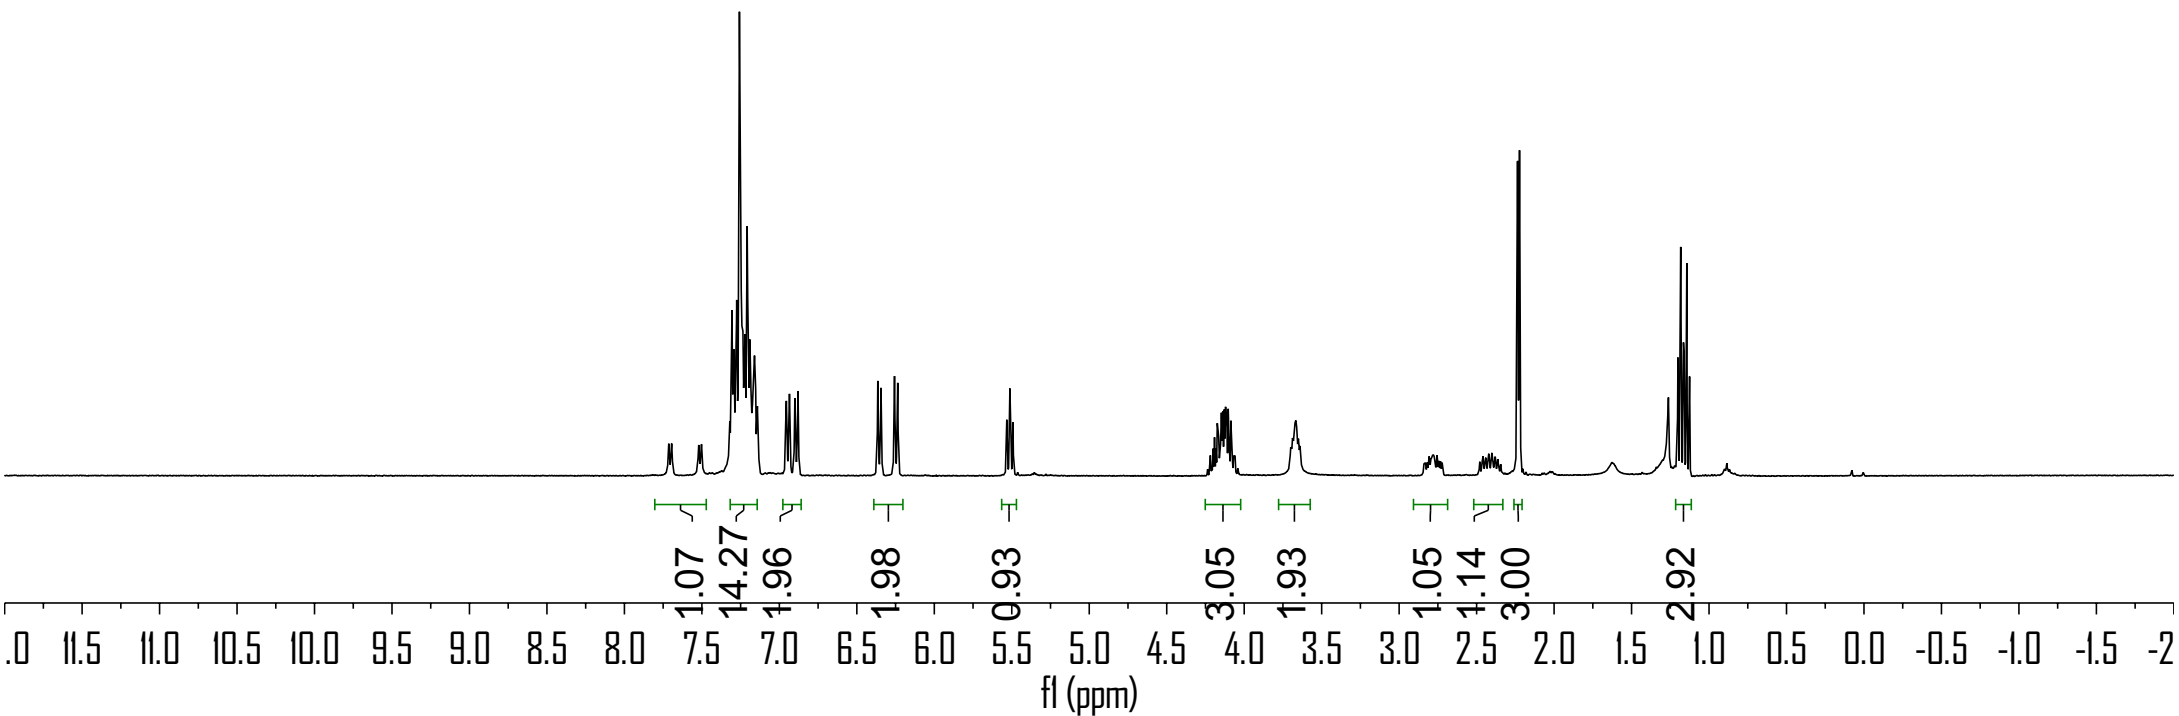



7.5210  
7.5078  
7.4009  
7.3876  
7.3047  
7.2911  
7.2745  
7.2645  
7.2513  
7.2399  
7.2281  
7.2070  
7.1941  
7.1858  
7.1740  
7.1541  
7.1405  
7.1099  
7.0978  
7.0843  
7.0725  
6.9861  
6.8990  
6.8860  
6.8730  
6.8146  
6.4170  
6.2105  
6.1936  
6.1797  
4.8943  
4.8909  
4.1222  
4.1159  
4.1036  
4.0909  
4.0793  
4.0631  
4.0511  
3.5654  
3.3066  
3.2984  
2.2524  
2.2162  
1.2008  
1.1889  
1.1769  
1.1322  
1.1204  
1.1085

<sup>1</sup>H NMR (600 MHz, CDCl<sub>3</sub>)

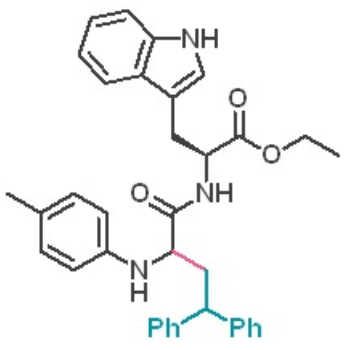

C23 (dr = 1.1:1)

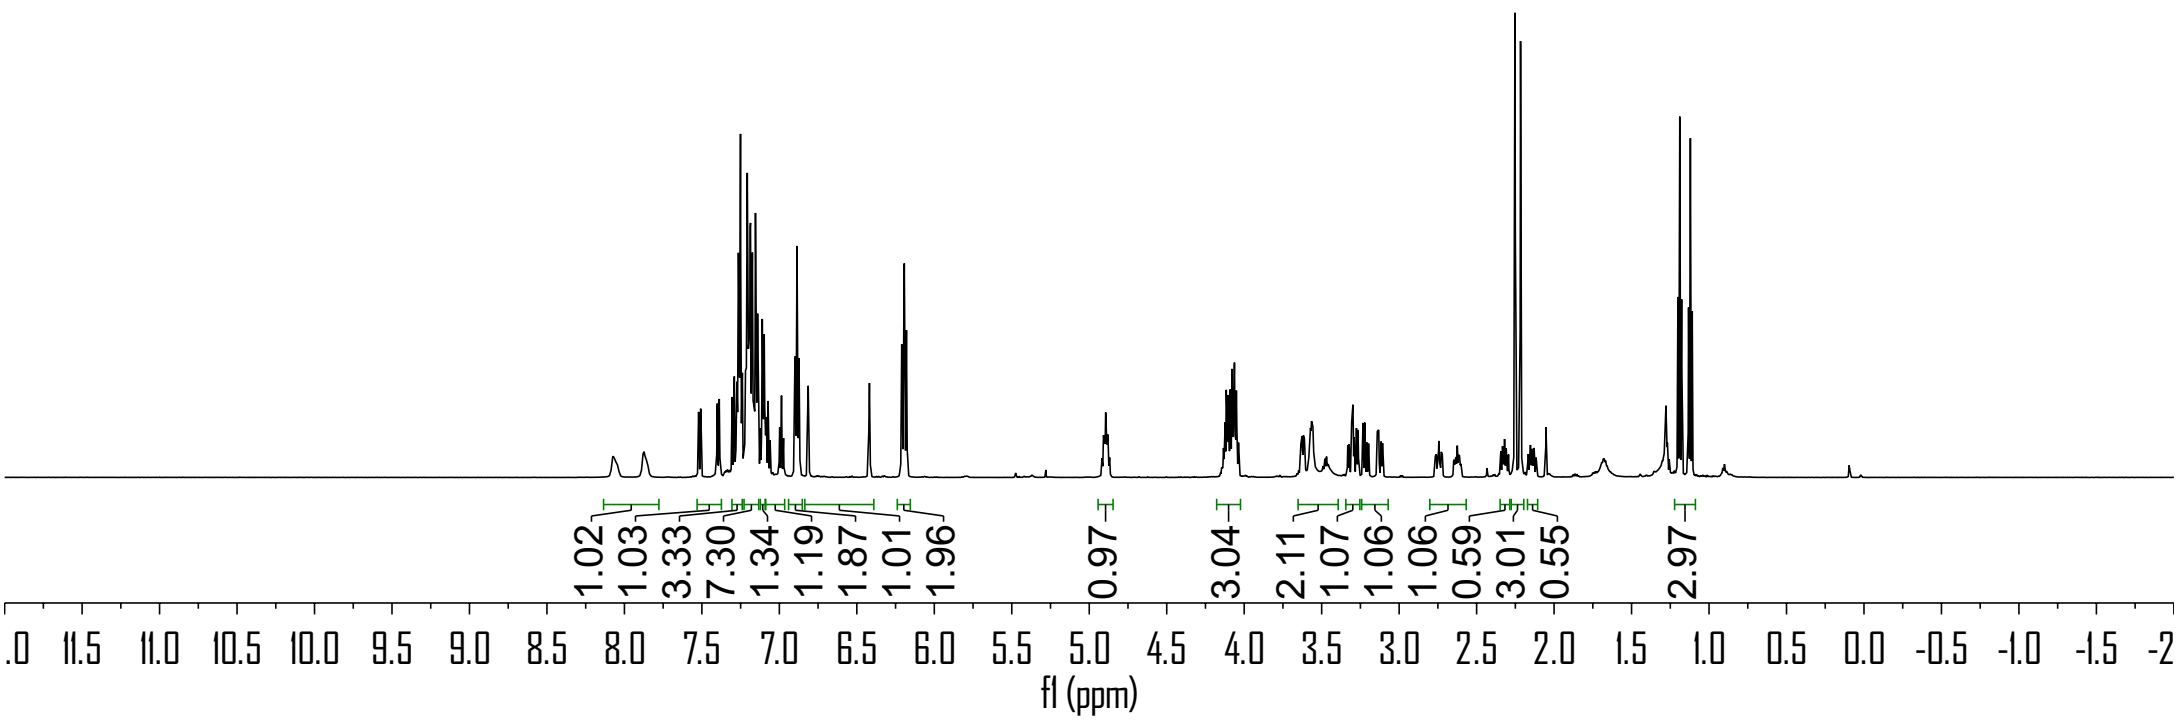

7.2870  
7.2747  
7.2637  
7.2429  
7.2336  
7.2234  
7.2060  
7.1945  
7.1748  
7.1632  
6.9327  
6.9194  
6.3419  
6.3278  
6.2845  
6.2704  
4.6793  
4.6711  
4.1893  
4.1773  
4.1655  
4.1536  
4.1290  
4.1171  
4.1052  
4.0933  
3.7001  
3.6909  
3.6852  
2.8038  
2.7806  
2.4192  
2.4085  
2.3952  
2.2733  
2.2616  
2.2538  
2.2493  
2.2395  
2.2145  
2.2105  
2.0128  
1.9129  
1.9044  
1.2624  
1.2505  
1.2385  
1.1869  
1.1750  
1.1631

<sup>1</sup>H NMR (600 MHz, CDCl<sub>3</sub>)

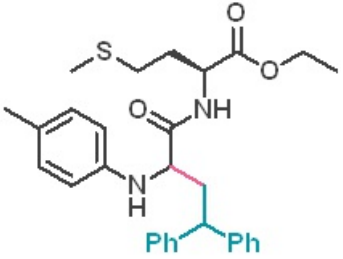

C24 (dr = 1.3:1)

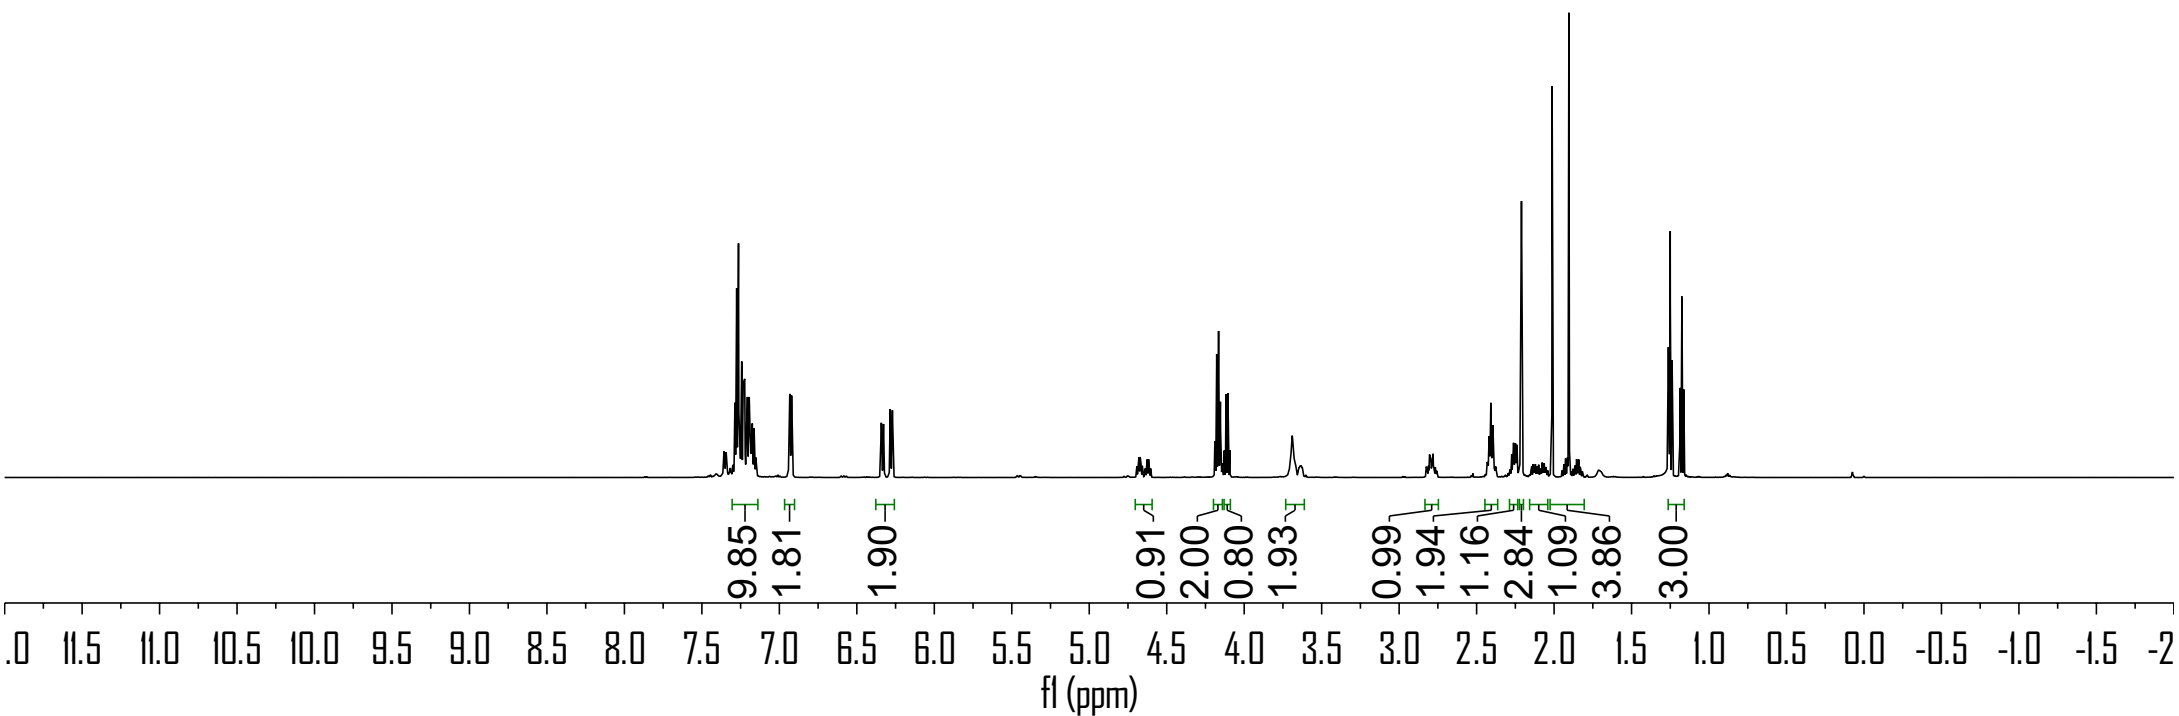

7.3126  
7.2990  
7.2872  
7.2698  
7.2498  
7.2385  
7.2150  
7.2125  
7.2005  
7.1913  
7.1886  
7.1802  
7.1715  
6.9441  
6.9306  
6.4243  
6.4104  
4.3911  
4.3857  
4.3768  
4.3730  
4.2520  
4.2389  
4.2259  
3.9397  
3.5504  
3.5208  
3.3319  
3.3286  
3.3200  
2.9710  
2.9549  
2.4454  
2.4361  
2.4310  
2.4154  
2.4035  
2.3918  
2.2191  
2.0734  
2.0388  
1.9060  
1.8977  
1.8894  
1.8829  
1.8796  
1.8034  
1.7972  
1.7946  
1.7911

<sup>1</sup>H NMR (600 MHz, CDCl<sub>3</sub>)

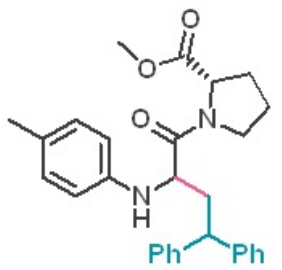

C25 (dr = 6:1)

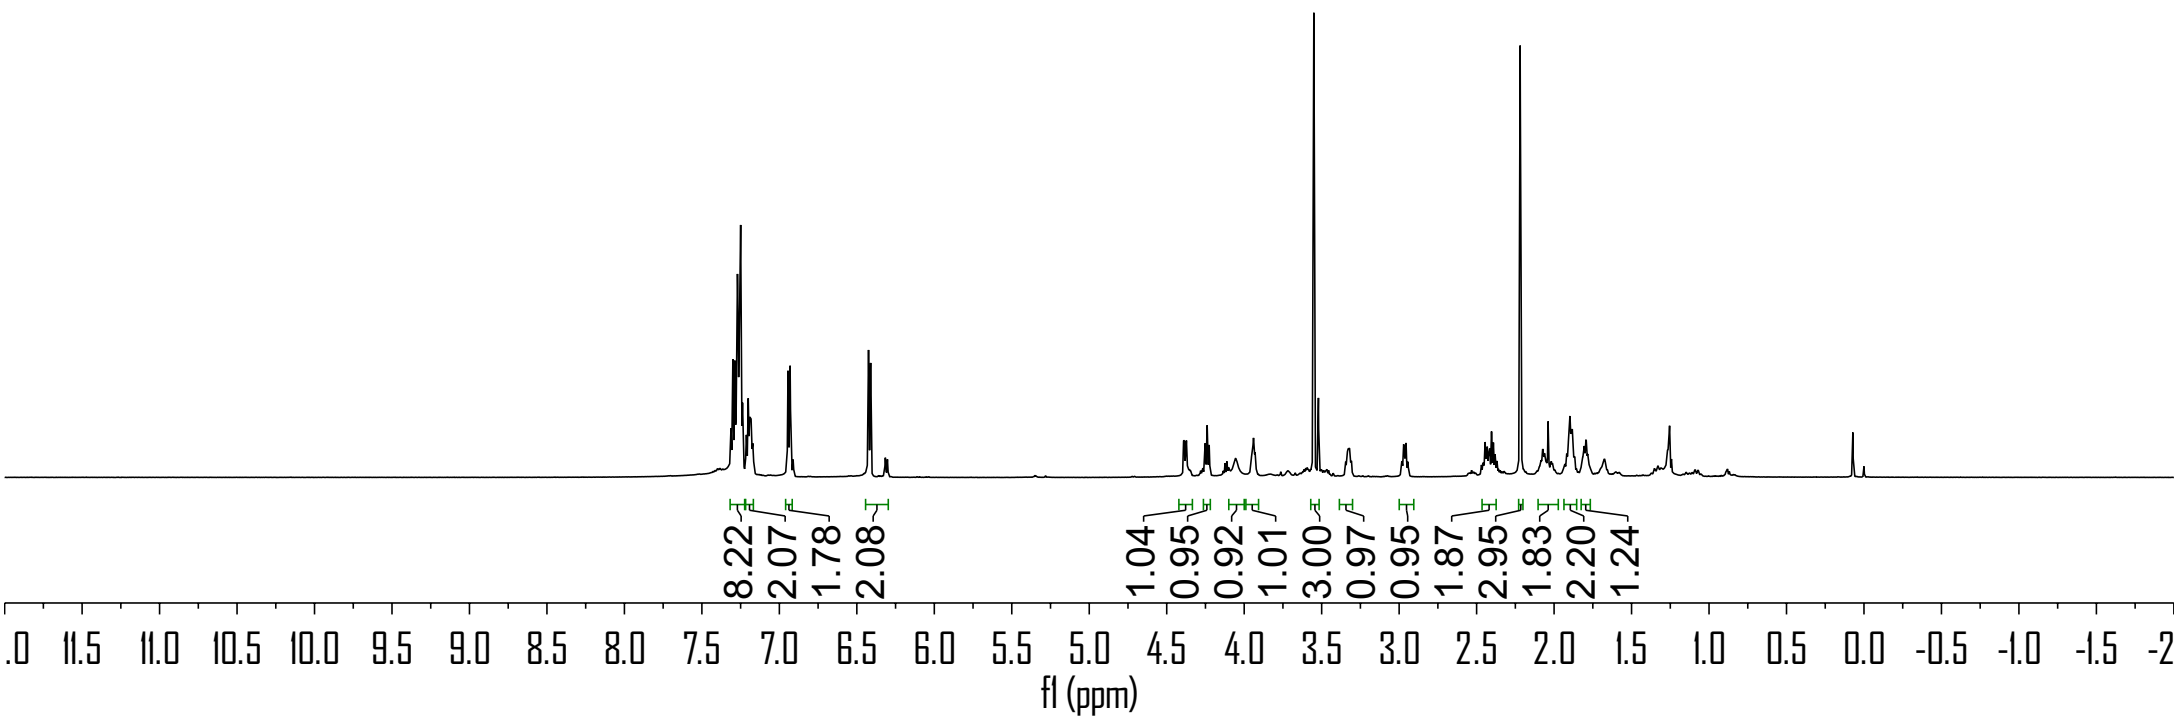

<sup>1</sup>H NMR (400 MHz, CDCl<sub>3</sub>)

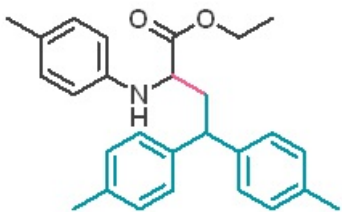

C26

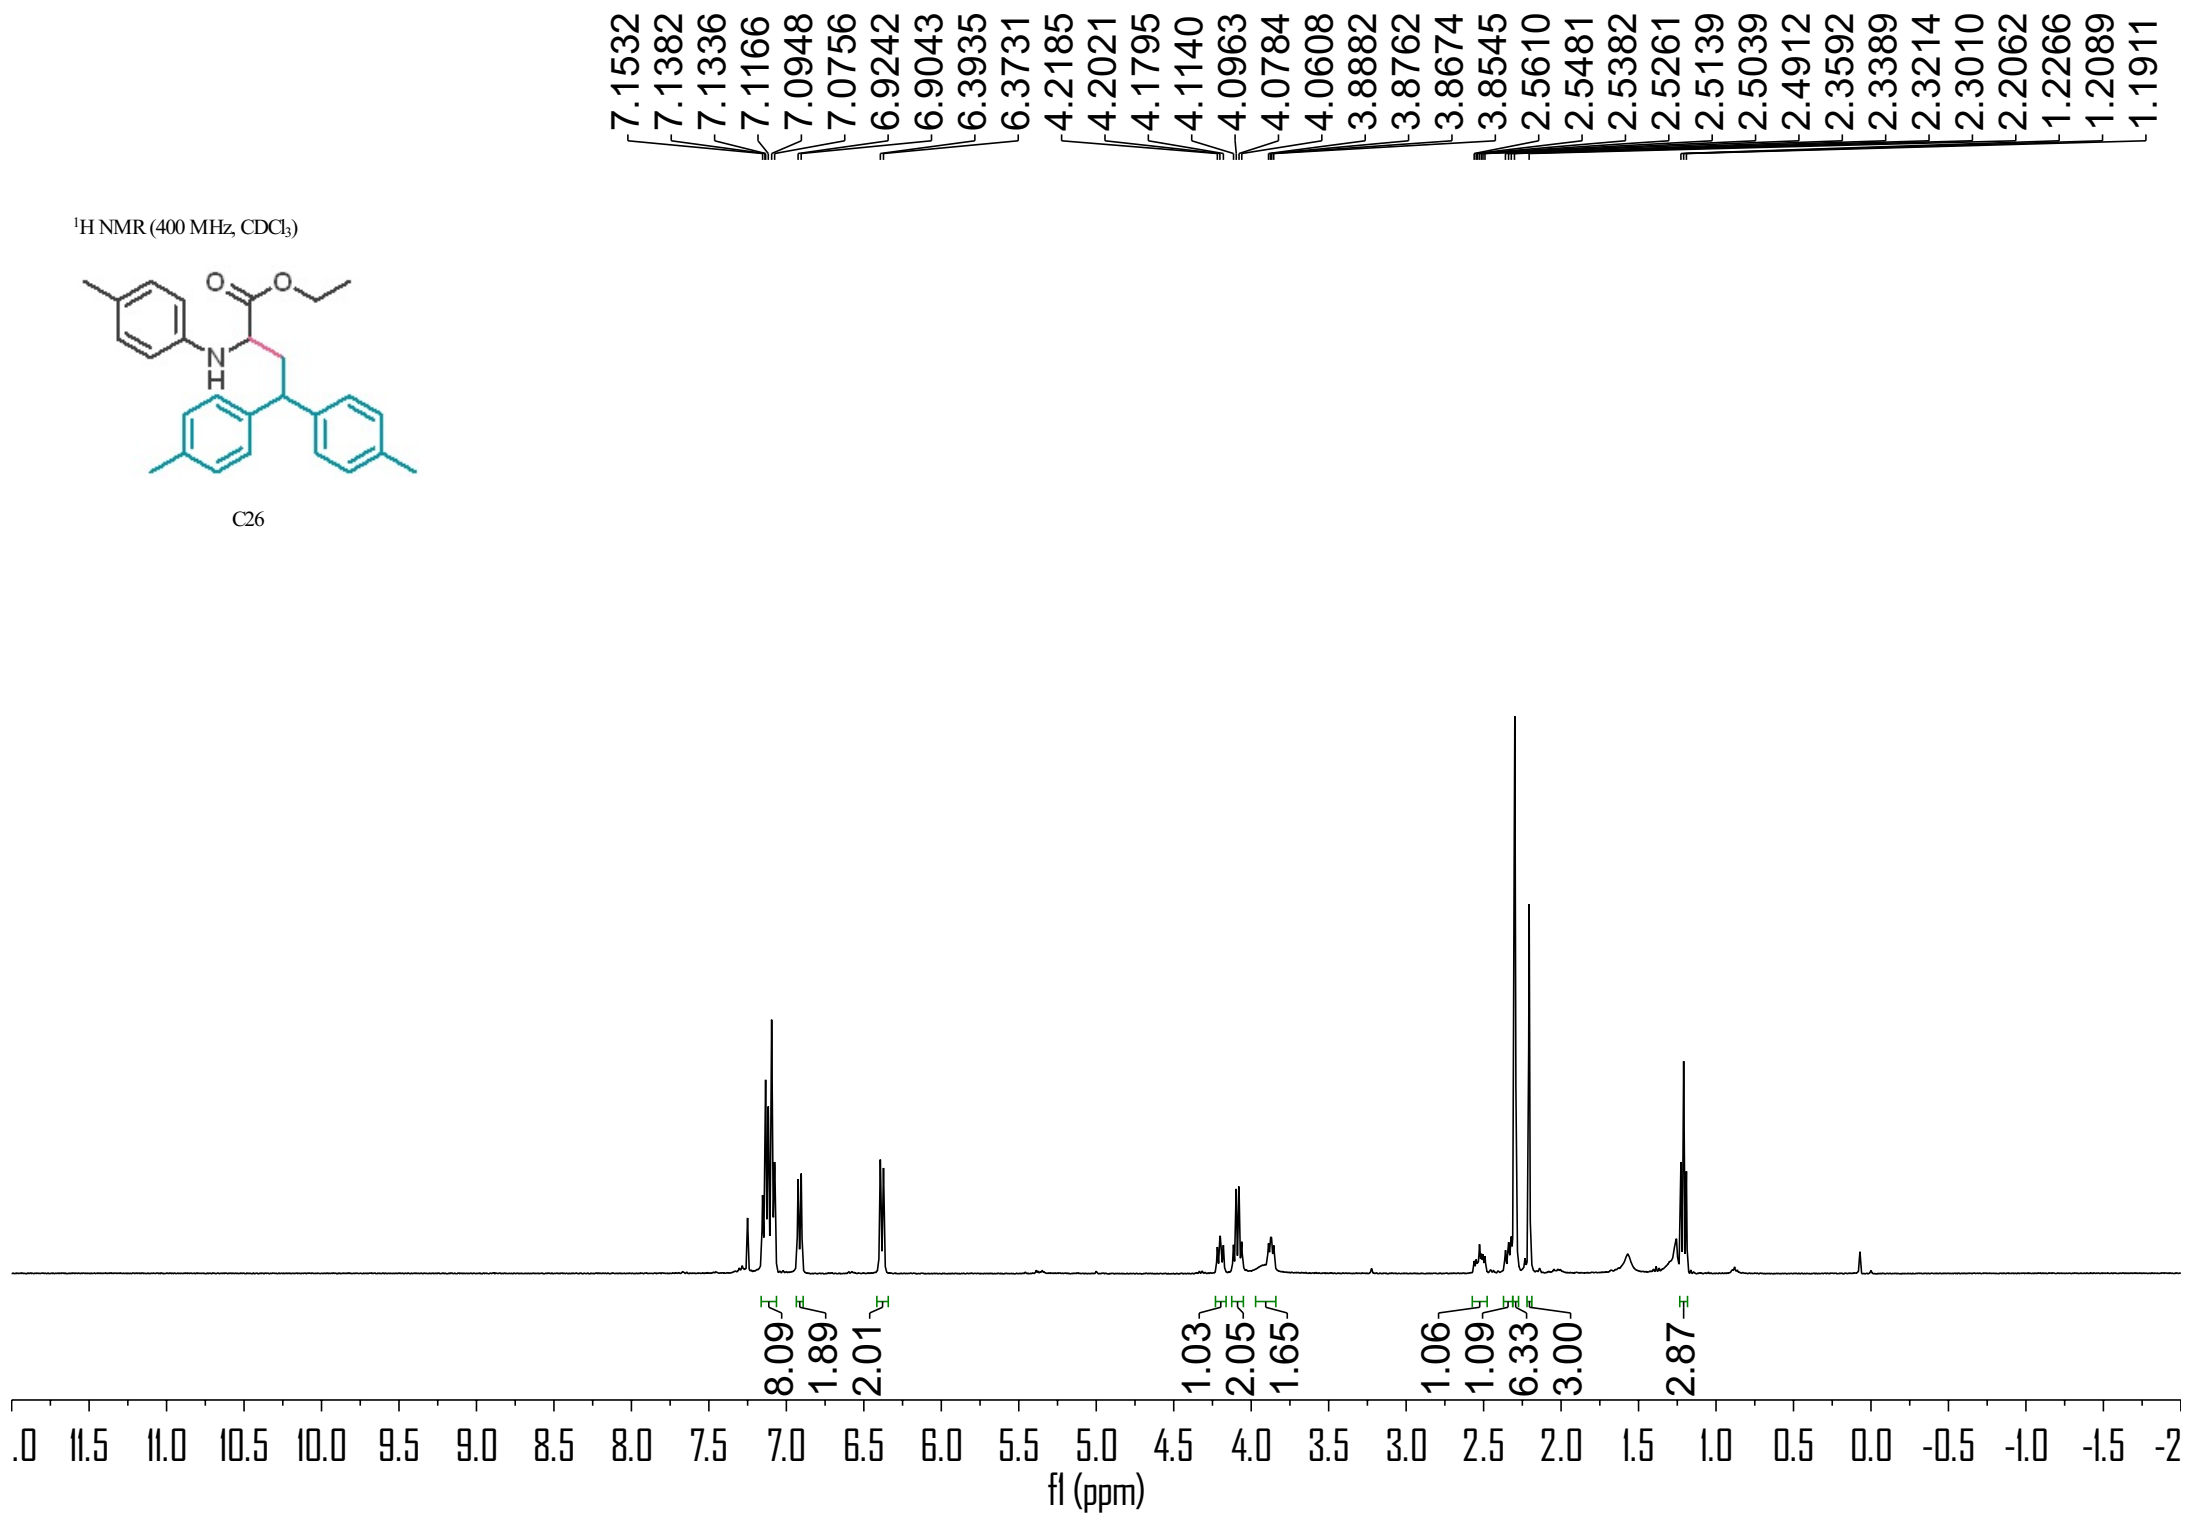

<sup>1</sup>H NMR (400 MHz, CDCl<sub>3</sub>)

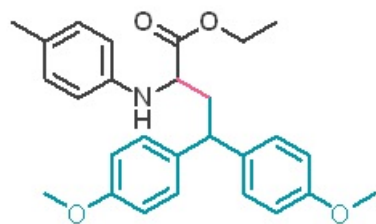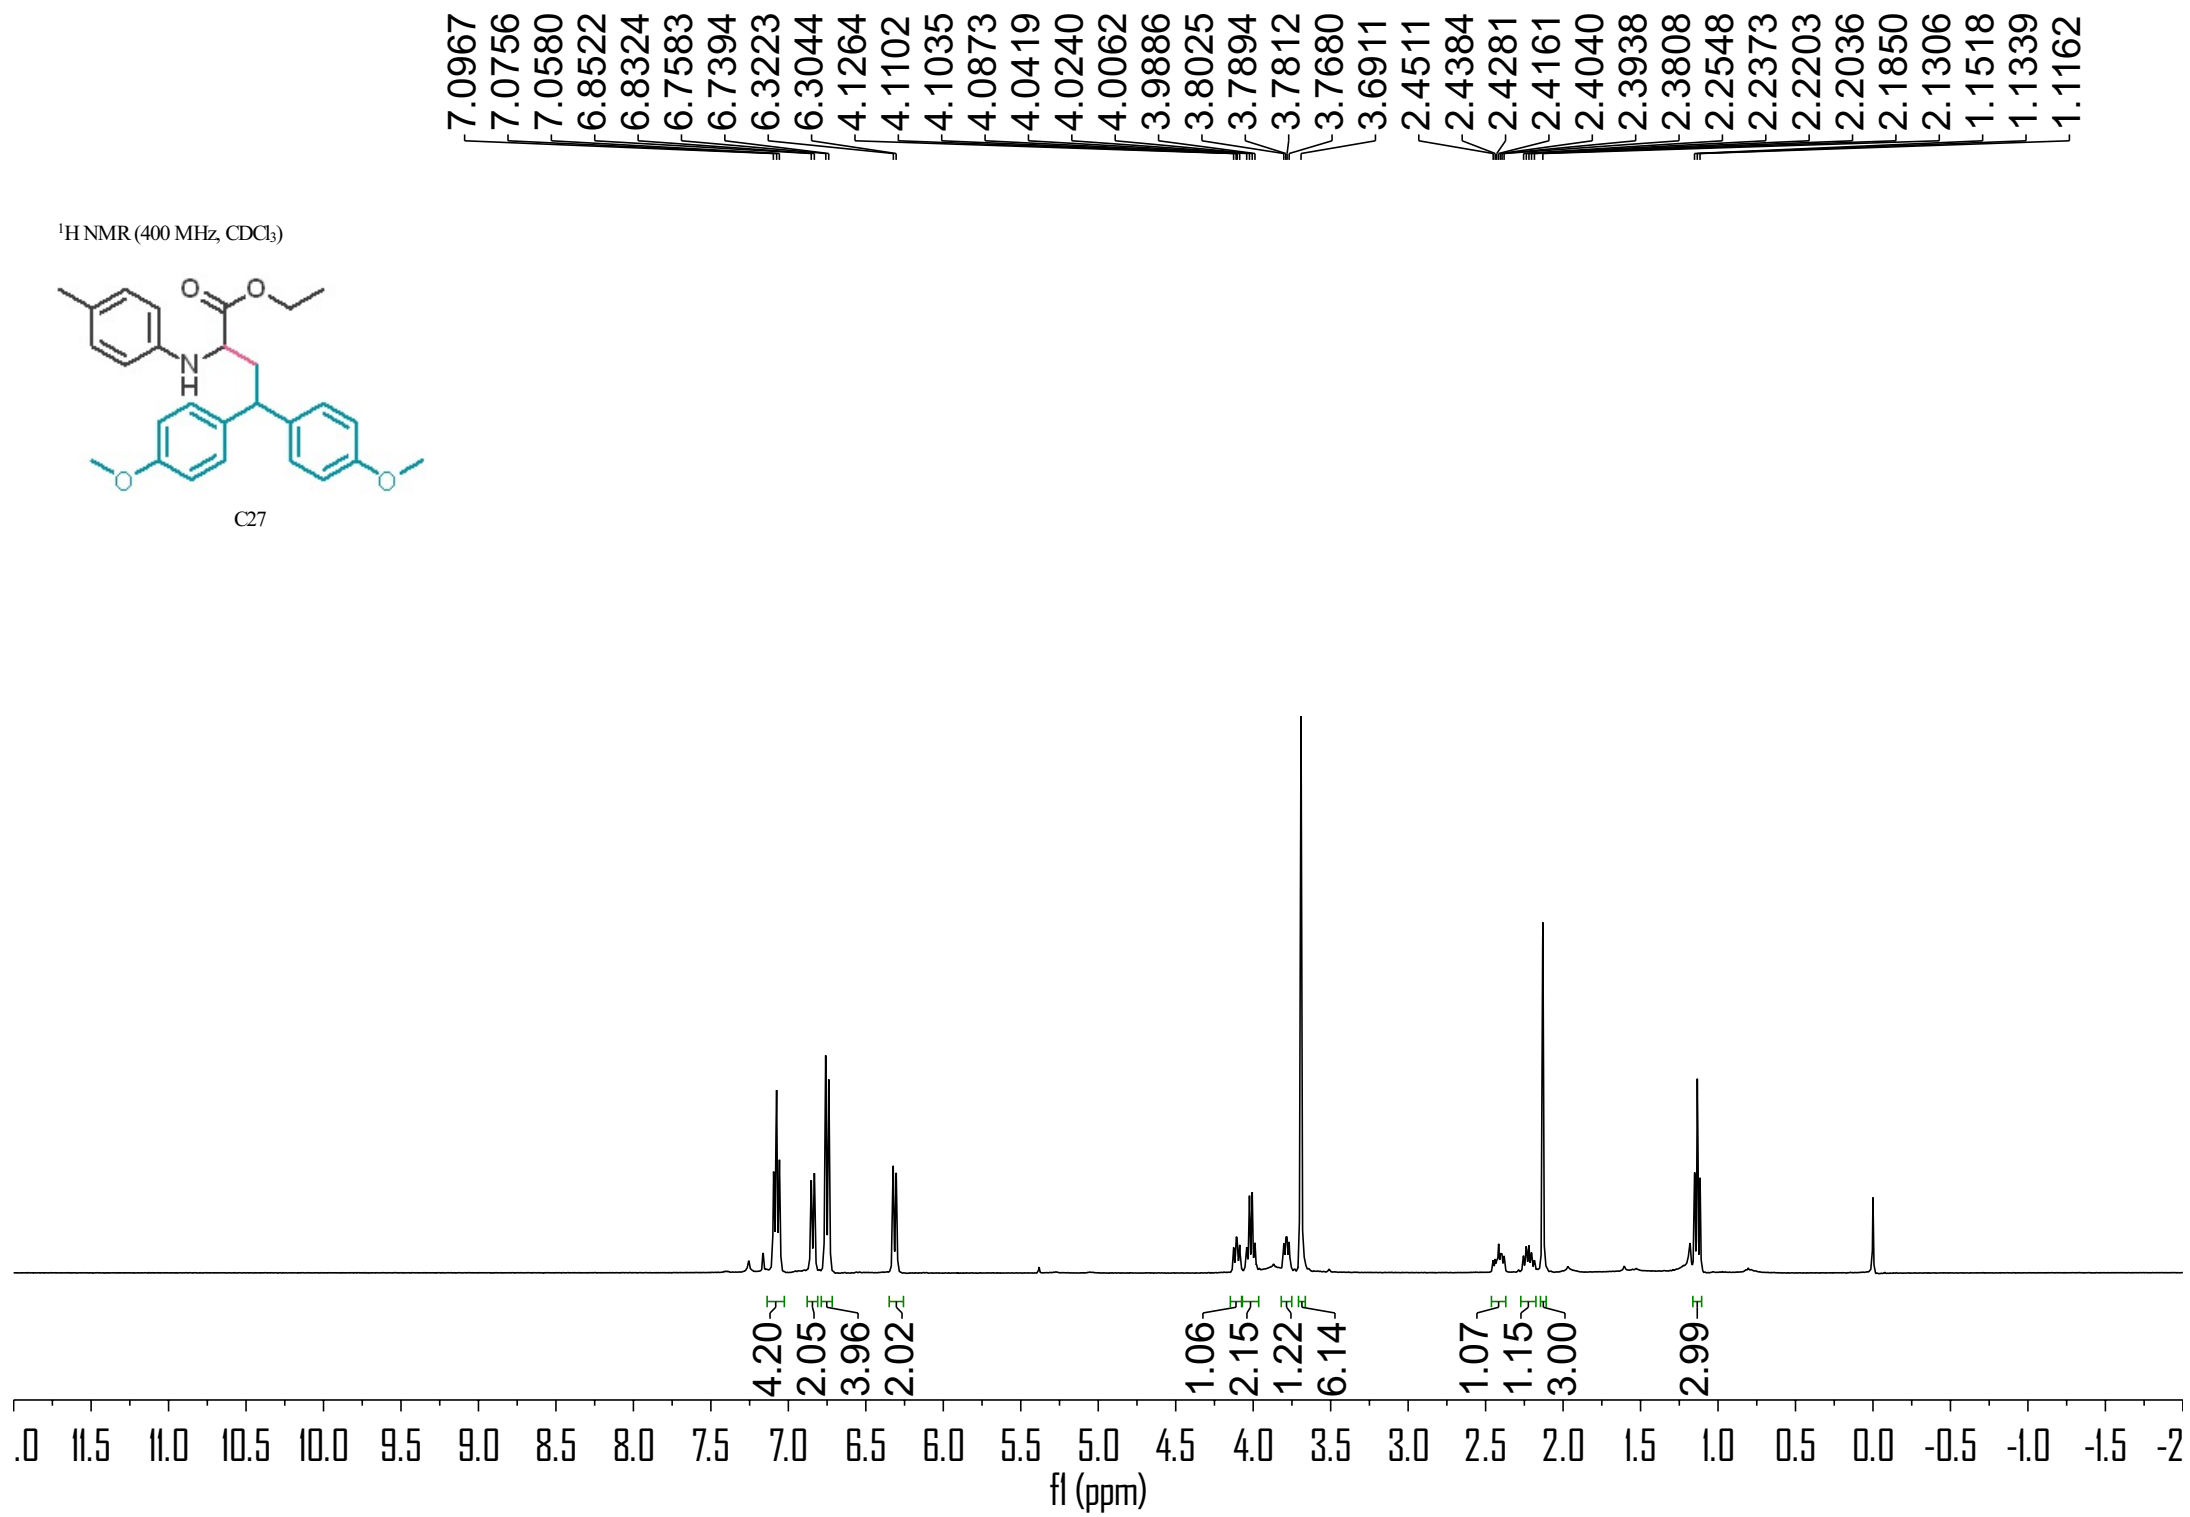

7.2113  
7.1984  
7.1924  
7.1847  
7.1770  
7.1629  
7.0182  
7.0077  
6.9866  
6.9655  
6.9408  
6.9210  
6.3915  
6.3719  
4.2965  
4.2814  
4.2739  
4.2575  
4.1347  
4.1256  
4.1161  
4.1078  
4.0971  
4.0901  
4.0788  
4.0711  
4.0607  
4.0515  
3.9184  
3.8409  
3.8284  
3.8185  
3.8056  
2.5371  
2.5254  
2.5142  
2.5022  
2.4903  
2.4788  
2.4674  
2.3353  
2.3166  
2.2995  
2.2818  
2.2642  
2.2145  
1.2282  
1.2105  
1.1928

<sup>1</sup>H NMR (400 MHz, CDCl<sub>3</sub>)

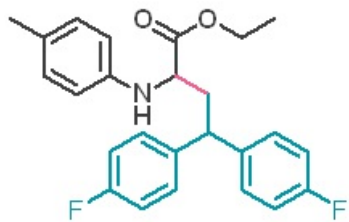

C28

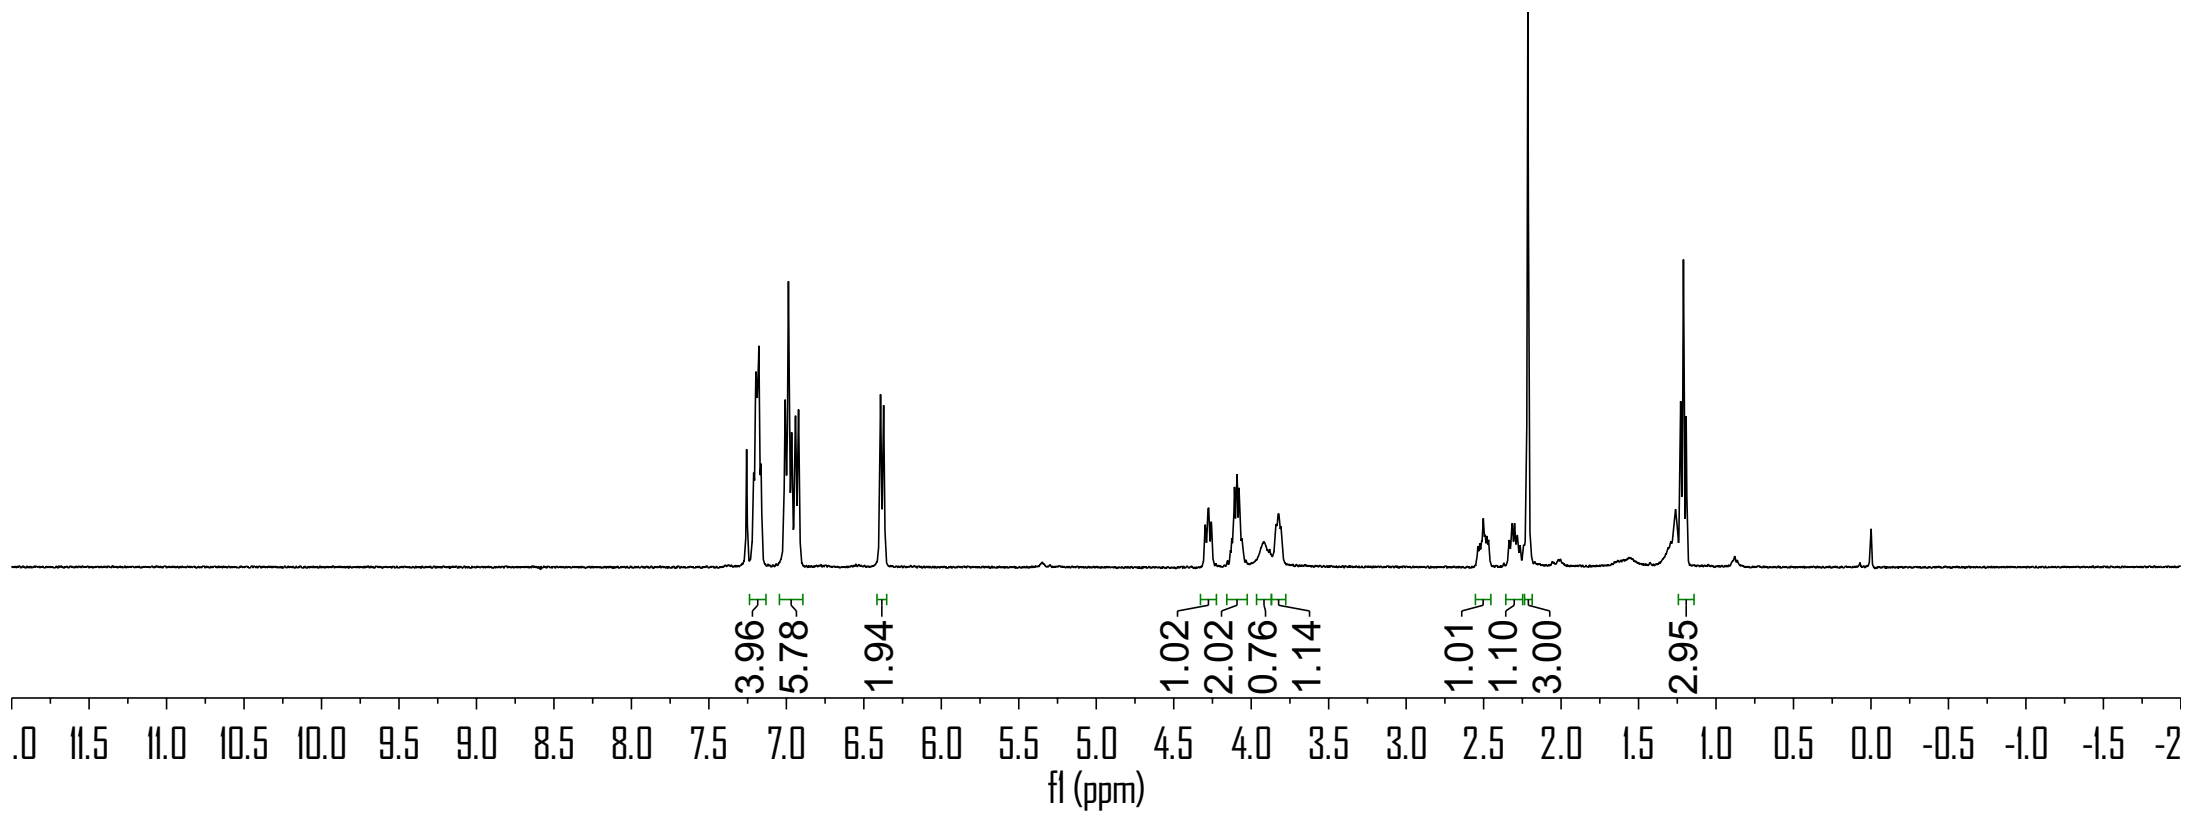

7.2740  
7.2691  
7.2530  
7.2478  
7.2331  
7.1646  
7.1591  
7.1518  
7.1439  
7.1309  
6.9442  
6.9241  
6.4020  
6.3812  
4.2837  
4.2686  
4.2601  
4.2448  
4.1294  
4.1203  
4.1027  
4.0878  
4.0844  
4.0701  
4.0523  
4.0430  
3.9426  
3.8357  
3.8231  
3.8137  
3.8010  
2.5340  
2.5218  
2.4990  
2.4760  
2.4638  
2.3274  
2.3055  
2.2914  
2.2778  
2.2560  
2.2135  
1.2203  
1.2025  
1.1847

<sup>1</sup>H NMR (400 MHz, CDCl<sub>3</sub>)

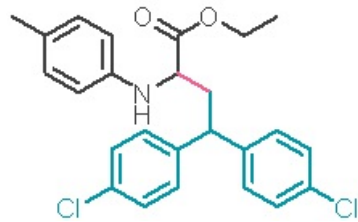

C29

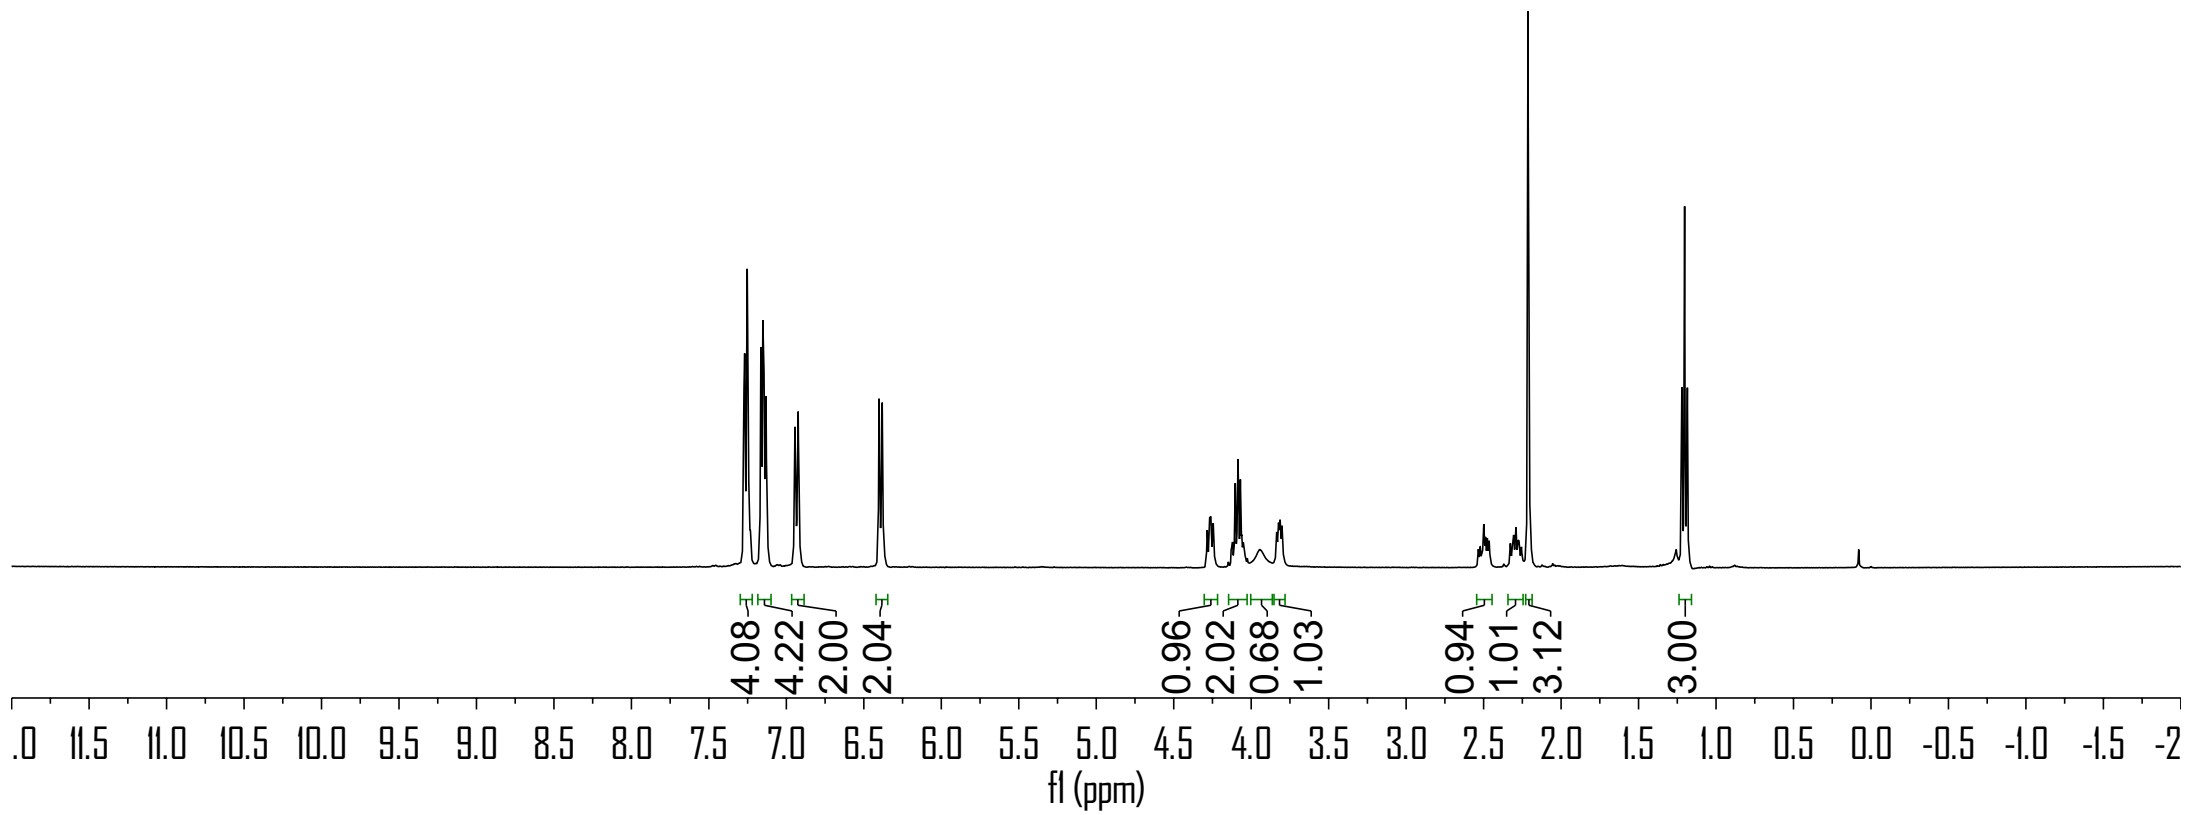

7.4310  
7.4104  
7.1120  
7.0981  
7.0914  
7.0775  
6.9494  
6.9295  
6.4023  
6.3822  
4.2566  
4.2410  
4.2328  
4.2176  
4.1335  
4.1249  
4.1155  
4.1066  
4.0911  
4.0731  
4.0554  
4.0468  
3.9192  
3.8348  
3.8217  
3.8127  
3.8002  
2.5322  
2.5203  
2.4971  
2.4738  
2.4621  
2.3243  
2.3082  
2.2884  
2.2735  
2.2527  
2.2199  
1.2250  
1.2072  
1.1893

<sup>1</sup>H NMR (400 MHz, CDCl<sub>3</sub>)

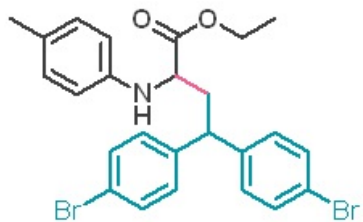

C30

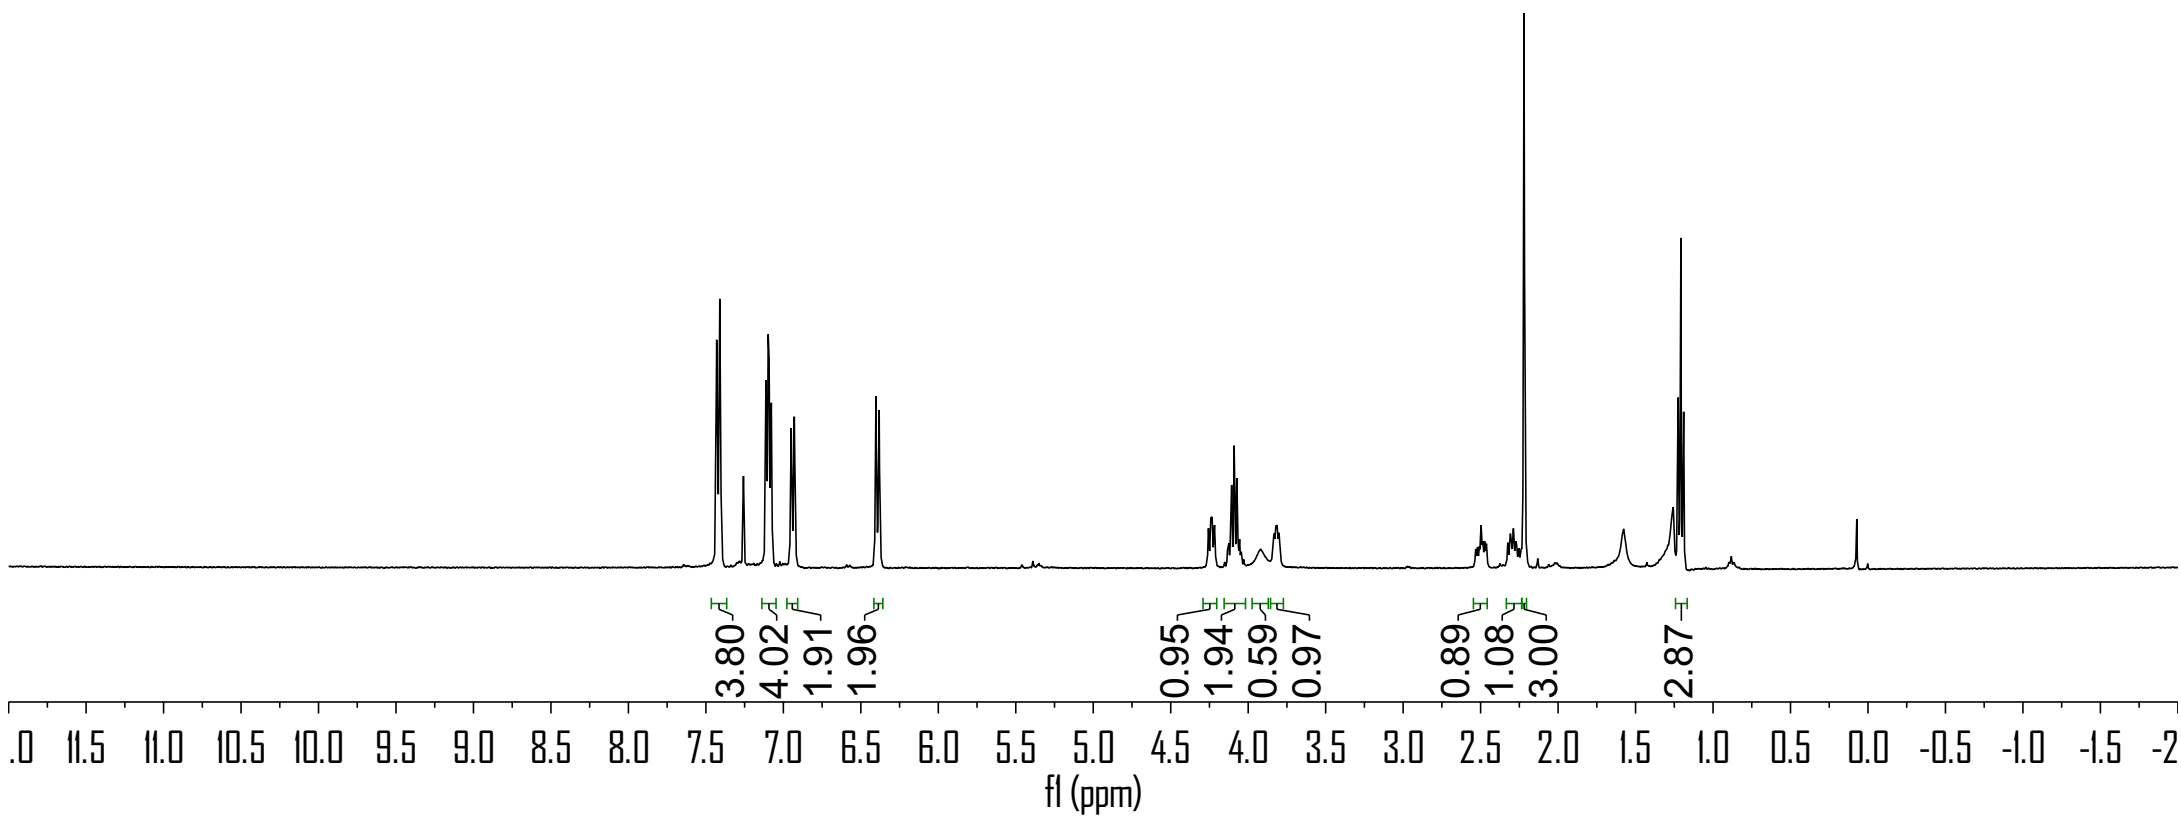



7.6020  
7.5981  
7.5859  
7.5808  
7.5685  
7.5526  
7.5348  
7.4579  
7.4362  
7.4204  
7.3712  
7.3558  
7.3365  
7.3253  
7.2625  
7.2582  
7.2414  
7.2313  
7.2193  
6.9507  
6.9308  
6.4297  
6.4231  
6.4085  
6.4019  
4.3748  
4.3586  
4.3521  
4.3360  
4.1418  
4.1243  
4.1138  
4.0961  
4.0887  
4.0796  
3.9669  
3.9506  
3.9309  
3.8942  
2.6565  
2.6351  
2.6134  
2.6031  
2.4426  
2.4250  
2.4070  
2.2295  
1.2568  
1.2390  
1.2213

<sup>1</sup>H NMR (400 MHz, CDCl<sub>3</sub>)

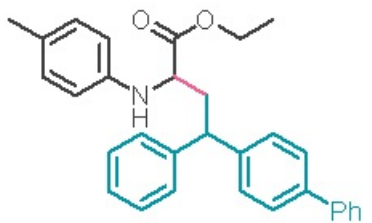

C31 (dr = 6.1:1)

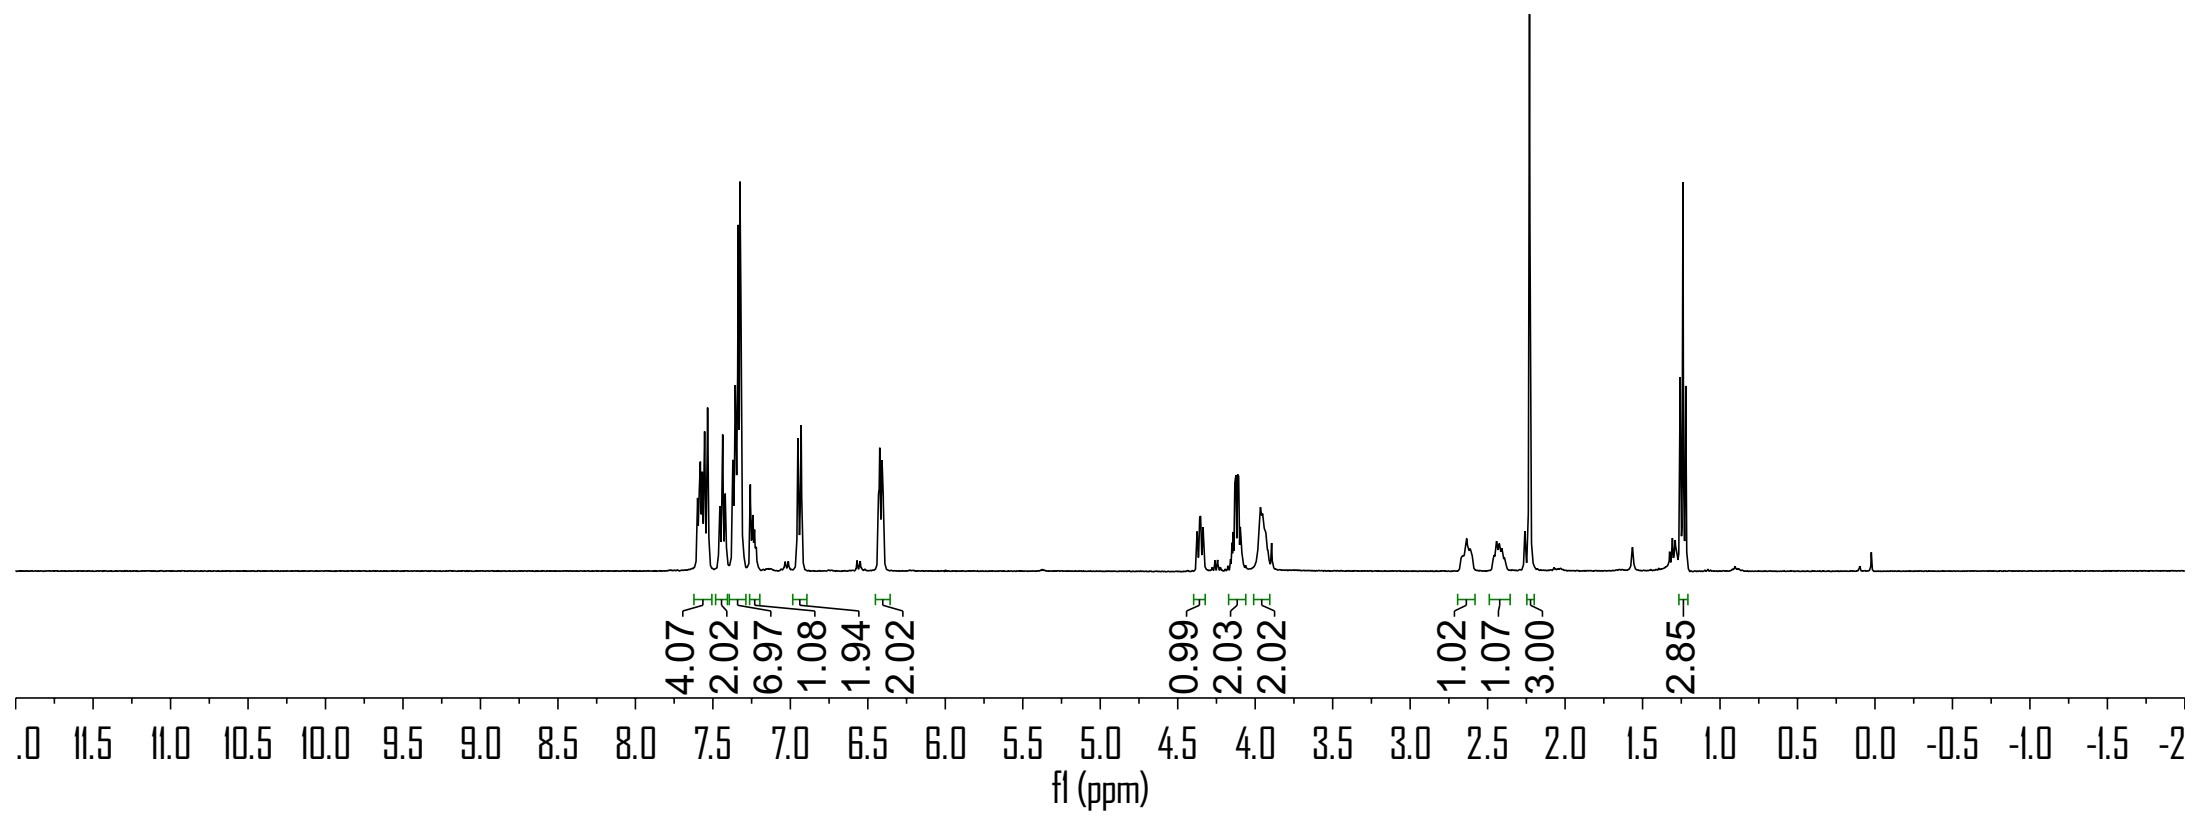

<sup>1</sup>H NMR (600 MHz, CDCl<sub>3</sub>)

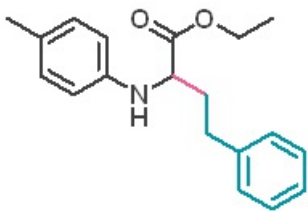

C32

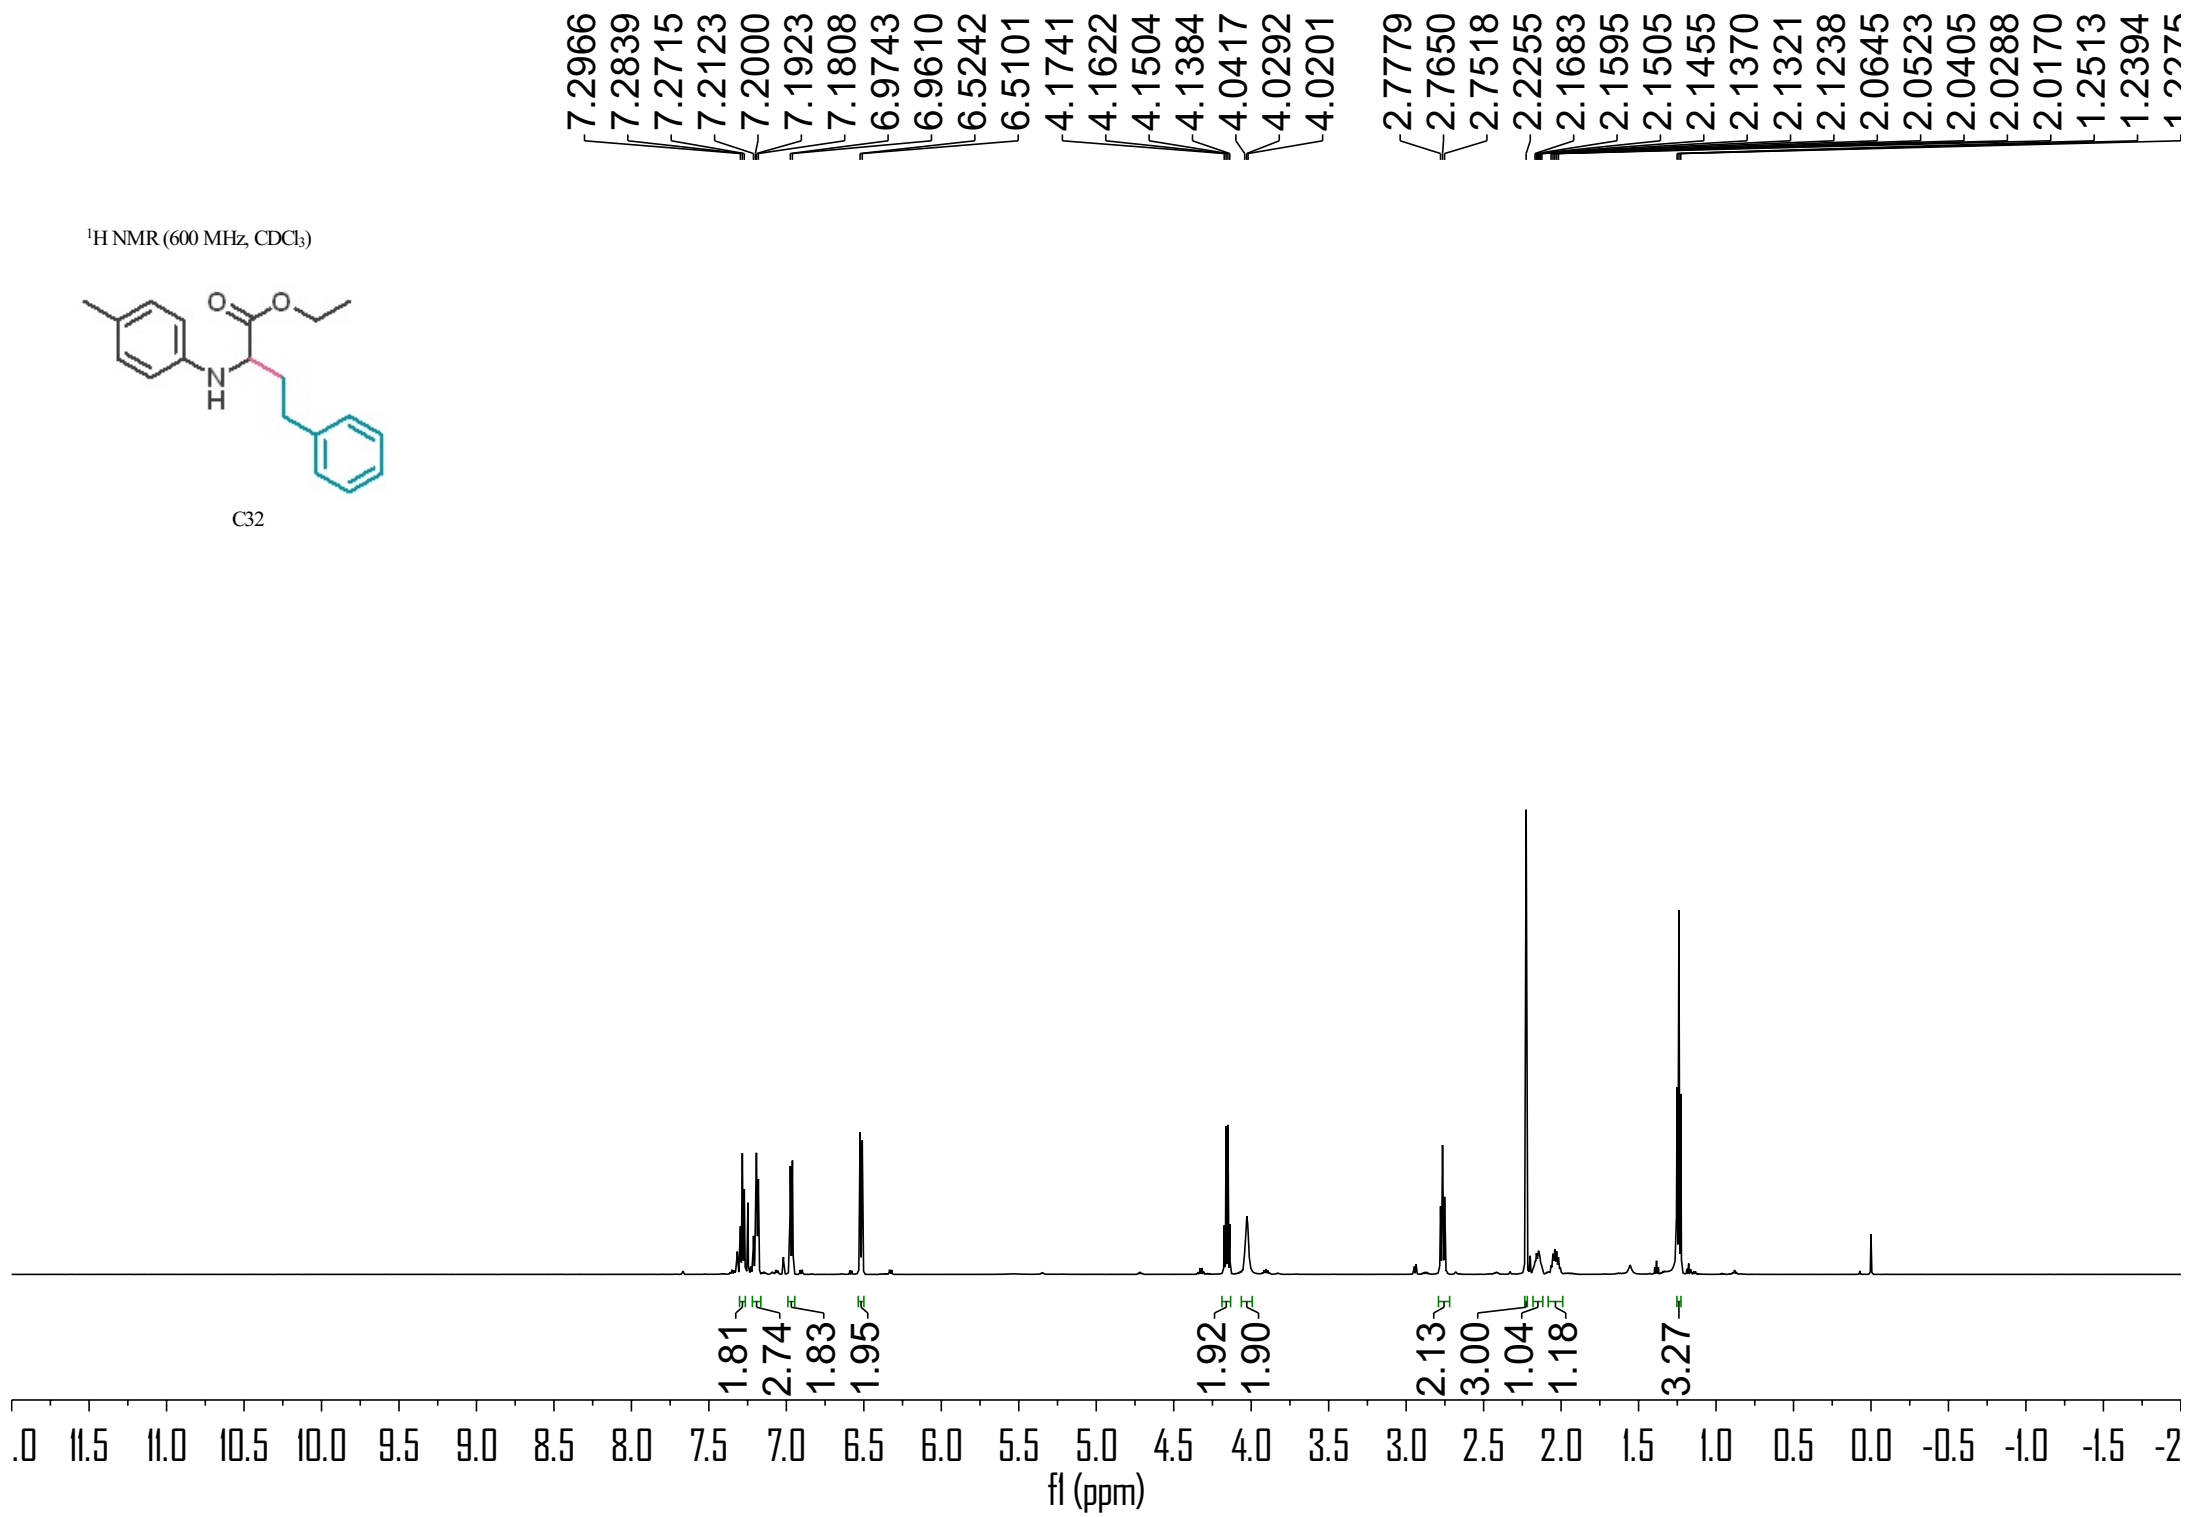

<sup>1</sup>H NMR (600 MHz, CDCl<sub>3</sub>)

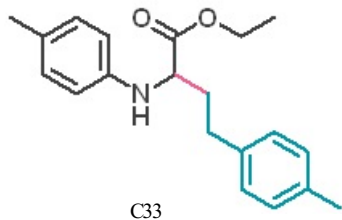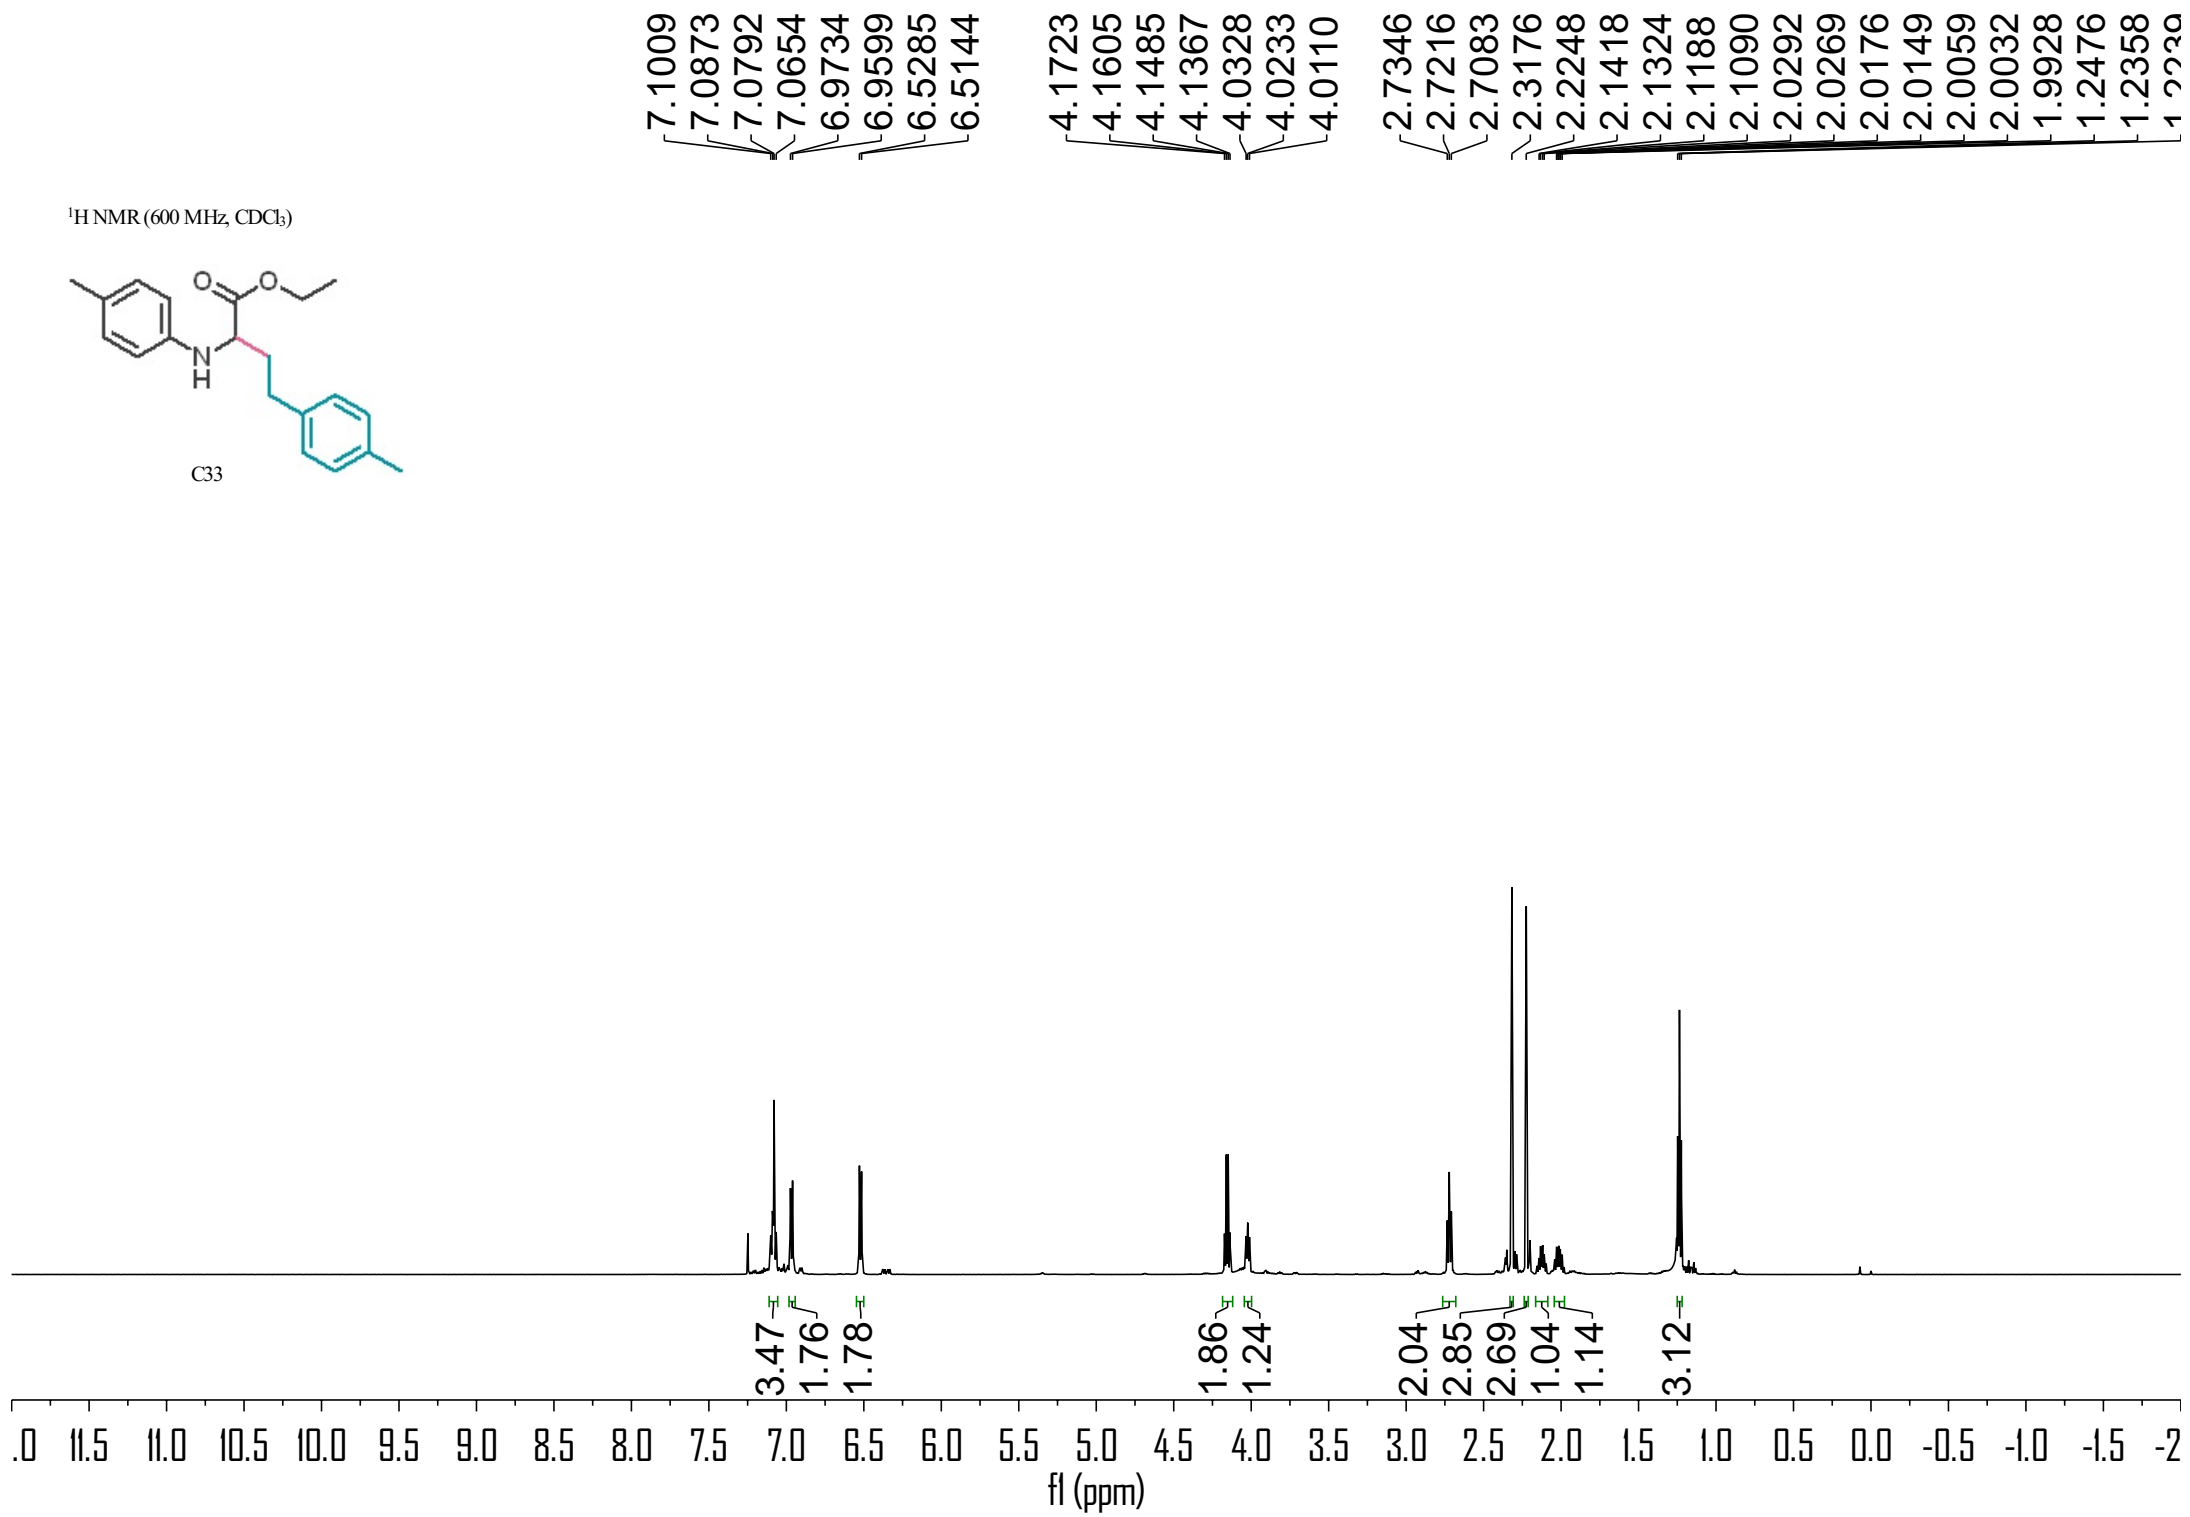

<sup>1</sup>H NMR (400 MHz, CDCl<sub>3</sub>)

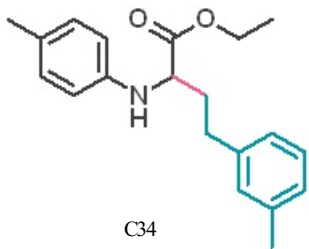

7.1924  
7.1738  
7.1553  
7.0231  
6.9975  
6.9772  
6.9583  
6.5282  
6.5071

4.1856  
4.1677  
4.1501  
4.1321  
4.0238  
2.7437  
2.7240  
2.7043  
2.3164  
2.2259  
2.1592  
2.1465  
2.1273  
2.1138  
2.0656  
2.0464  
2.0282  
2.0108  
1.9936  
1.2593  
1.2421  
1.2242

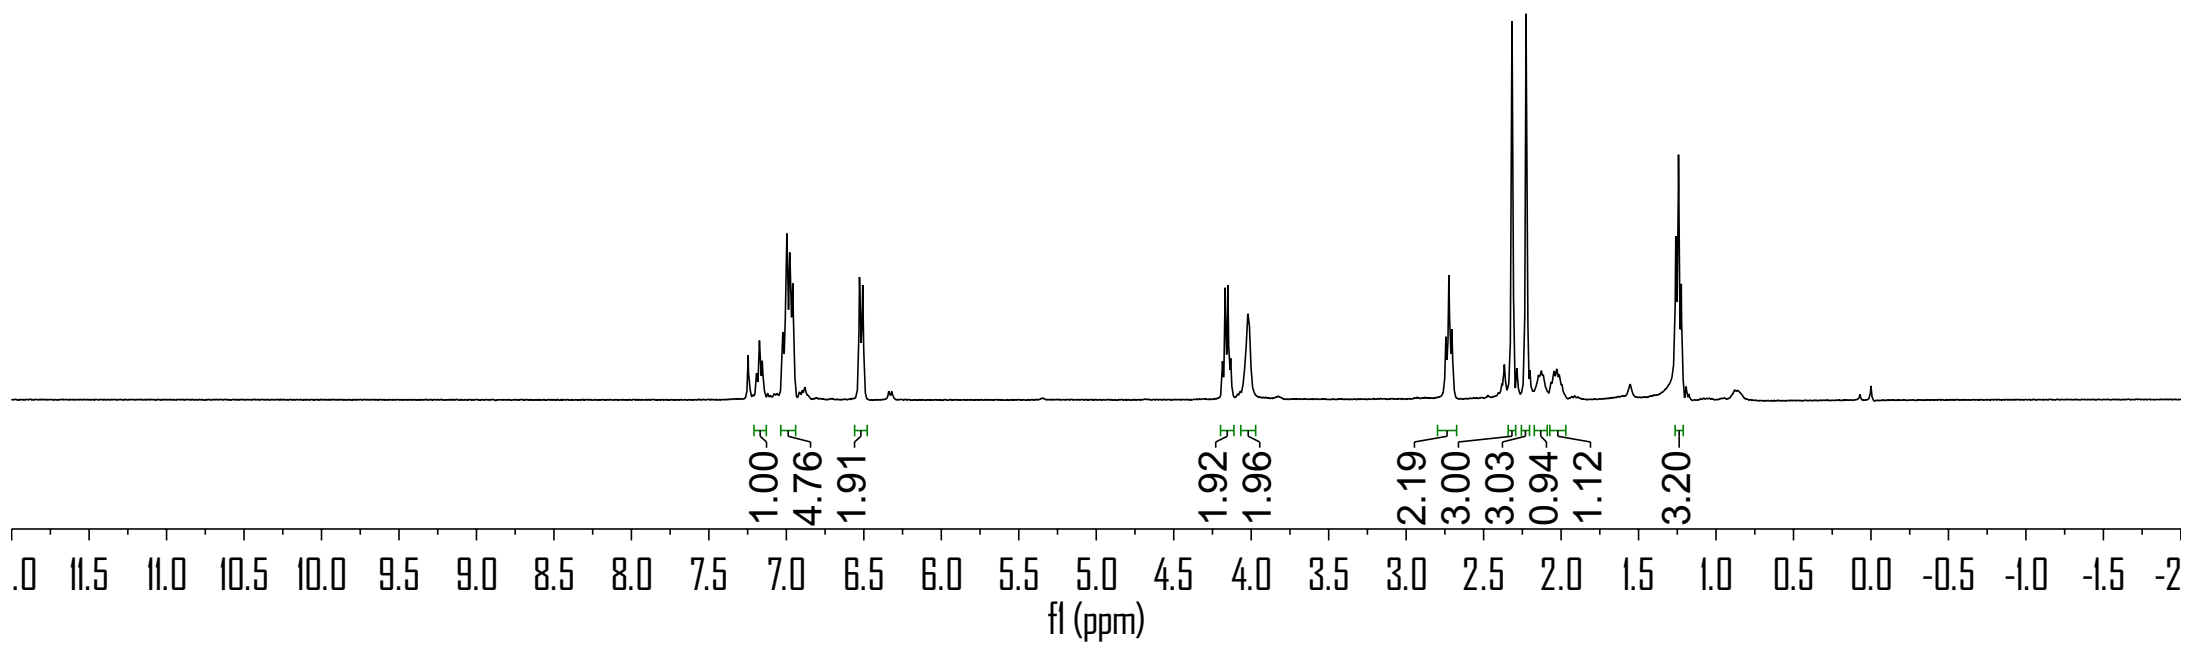

<sup>1</sup>H NMR (400 MHz, CDCl<sub>3</sub>)

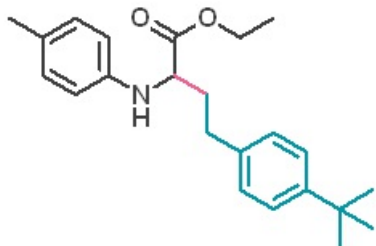

C35

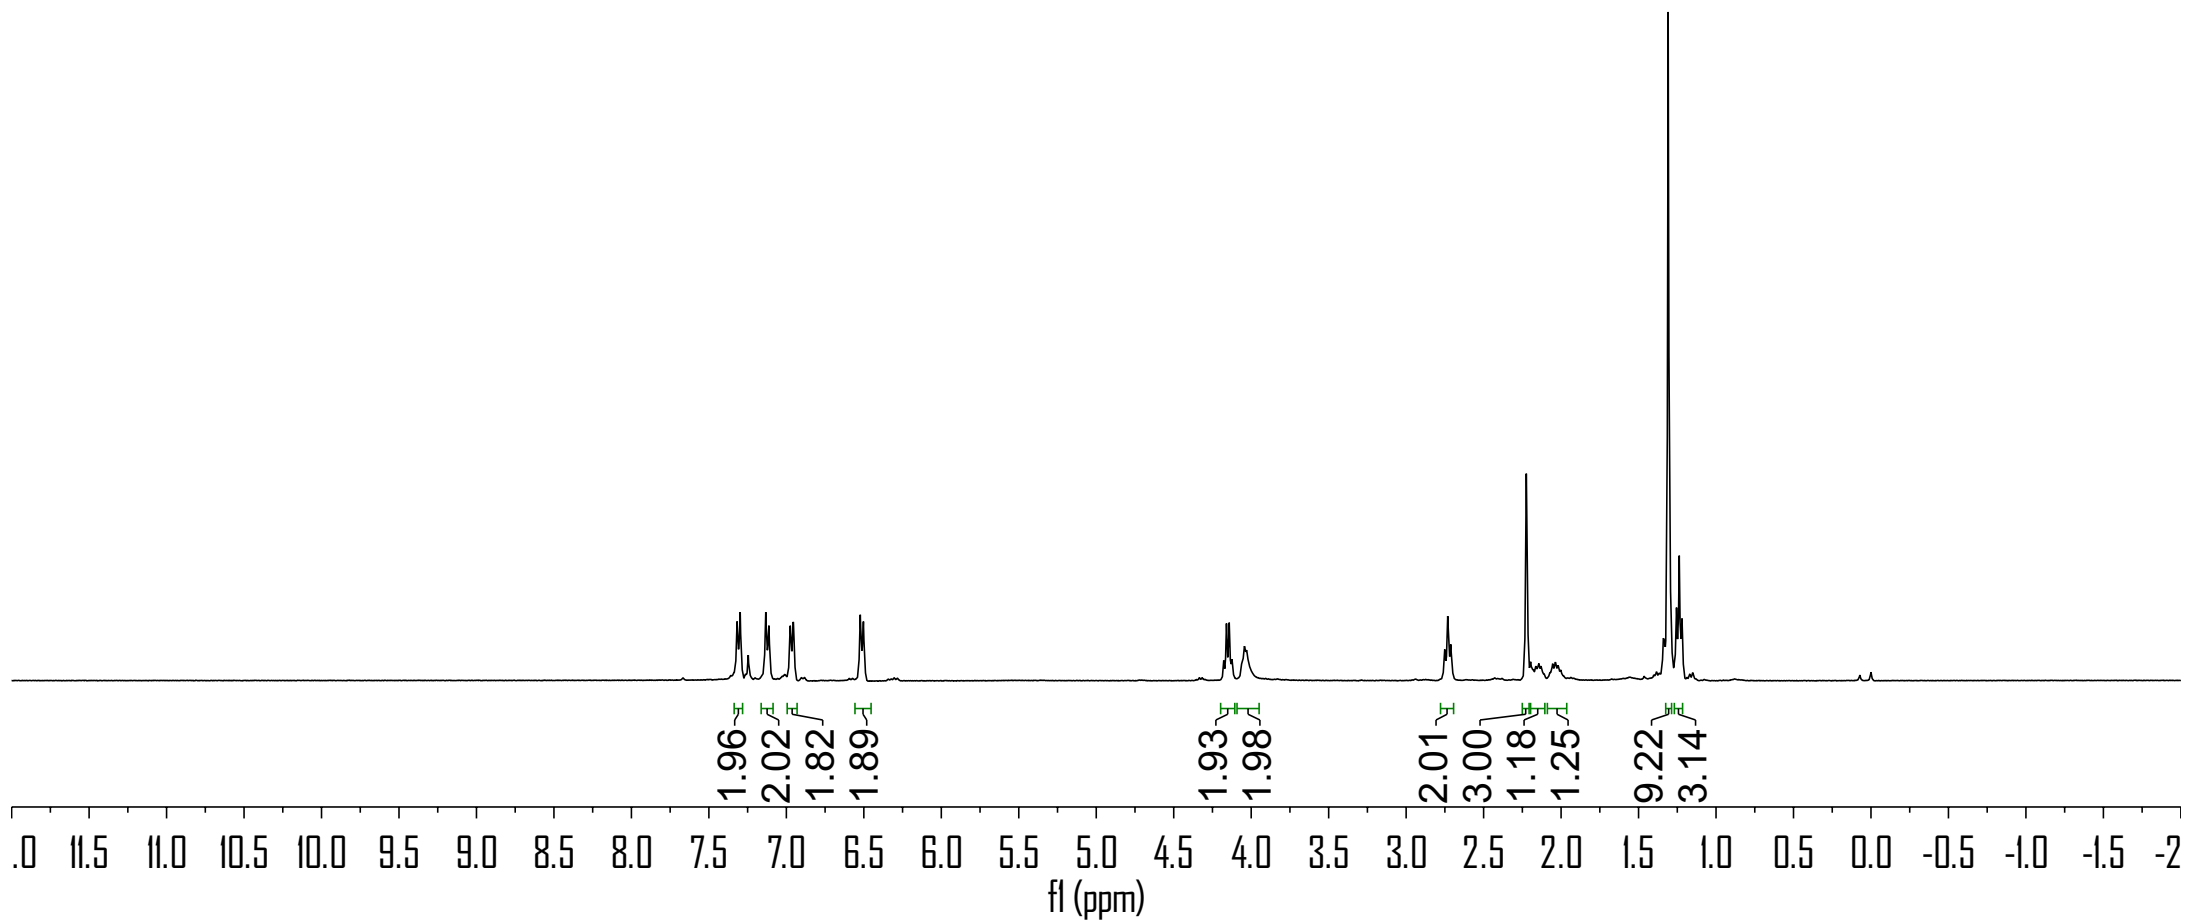

7.3180  
7.2976  
7.1328  
7.1130  
6.9751  
6.9553  
6.5232  
6.5021

4.1775  
4.1598  
4.1420  
4.1243  
4.0608  
4.0445  
4.0280

2.7513  
2.7316  
2.7119  
2.2244  
2.1971  
2.1784  
2.1631  
2.1496  
2.1435  
2.1296  
2.1241  
2.0543  
2.0361  
2.0191  
2.0018  
1.3088  
1.2553  
1.2375  
1.2107

<sup>1</sup>H NMR (600 MHz, CDCl<sub>3</sub>)

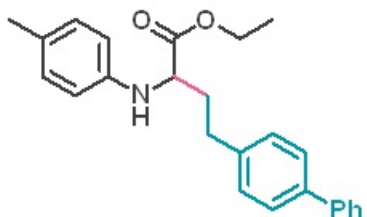

7.5857  
7.5719  
7.5262  
7.5124  
7.4393  
7.4272  
7.4137  
7.3397  
7.3275  
7.3150  
7.2669  
7.2529  
6.9817  
6.9684  
6.5419  
6.5279  
4.1845  
4.1726  
4.1608  
4.1489  
4.0622  
4.0504  
2.8230  
2.8099  
2.7967  
2.2293  
2.1983  
2.1857  
2.1757  
2.1712  
2.1004  
2.0883  
2.0762  
2.0646  
2.0528  
2.0416  
2.0395  
1.2590  
1.2470  
1.2352

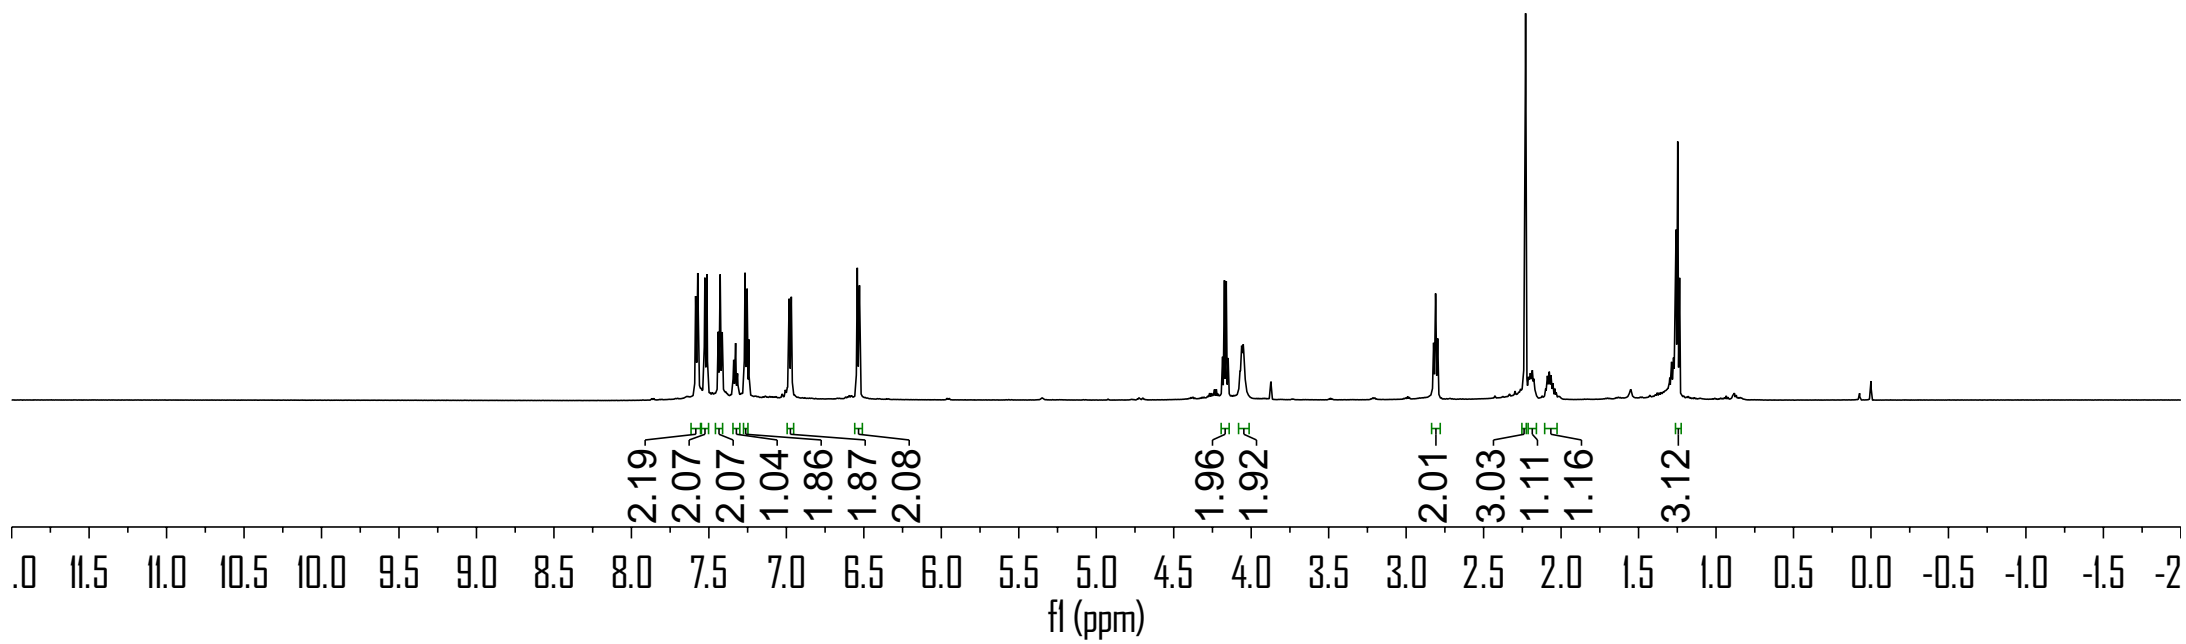

<sup>1</sup>H NMR (400 MHz, CDCl<sub>3</sub>)

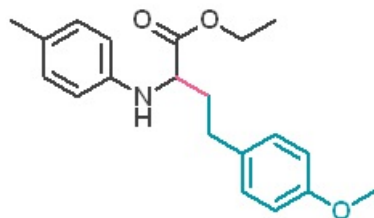

C37

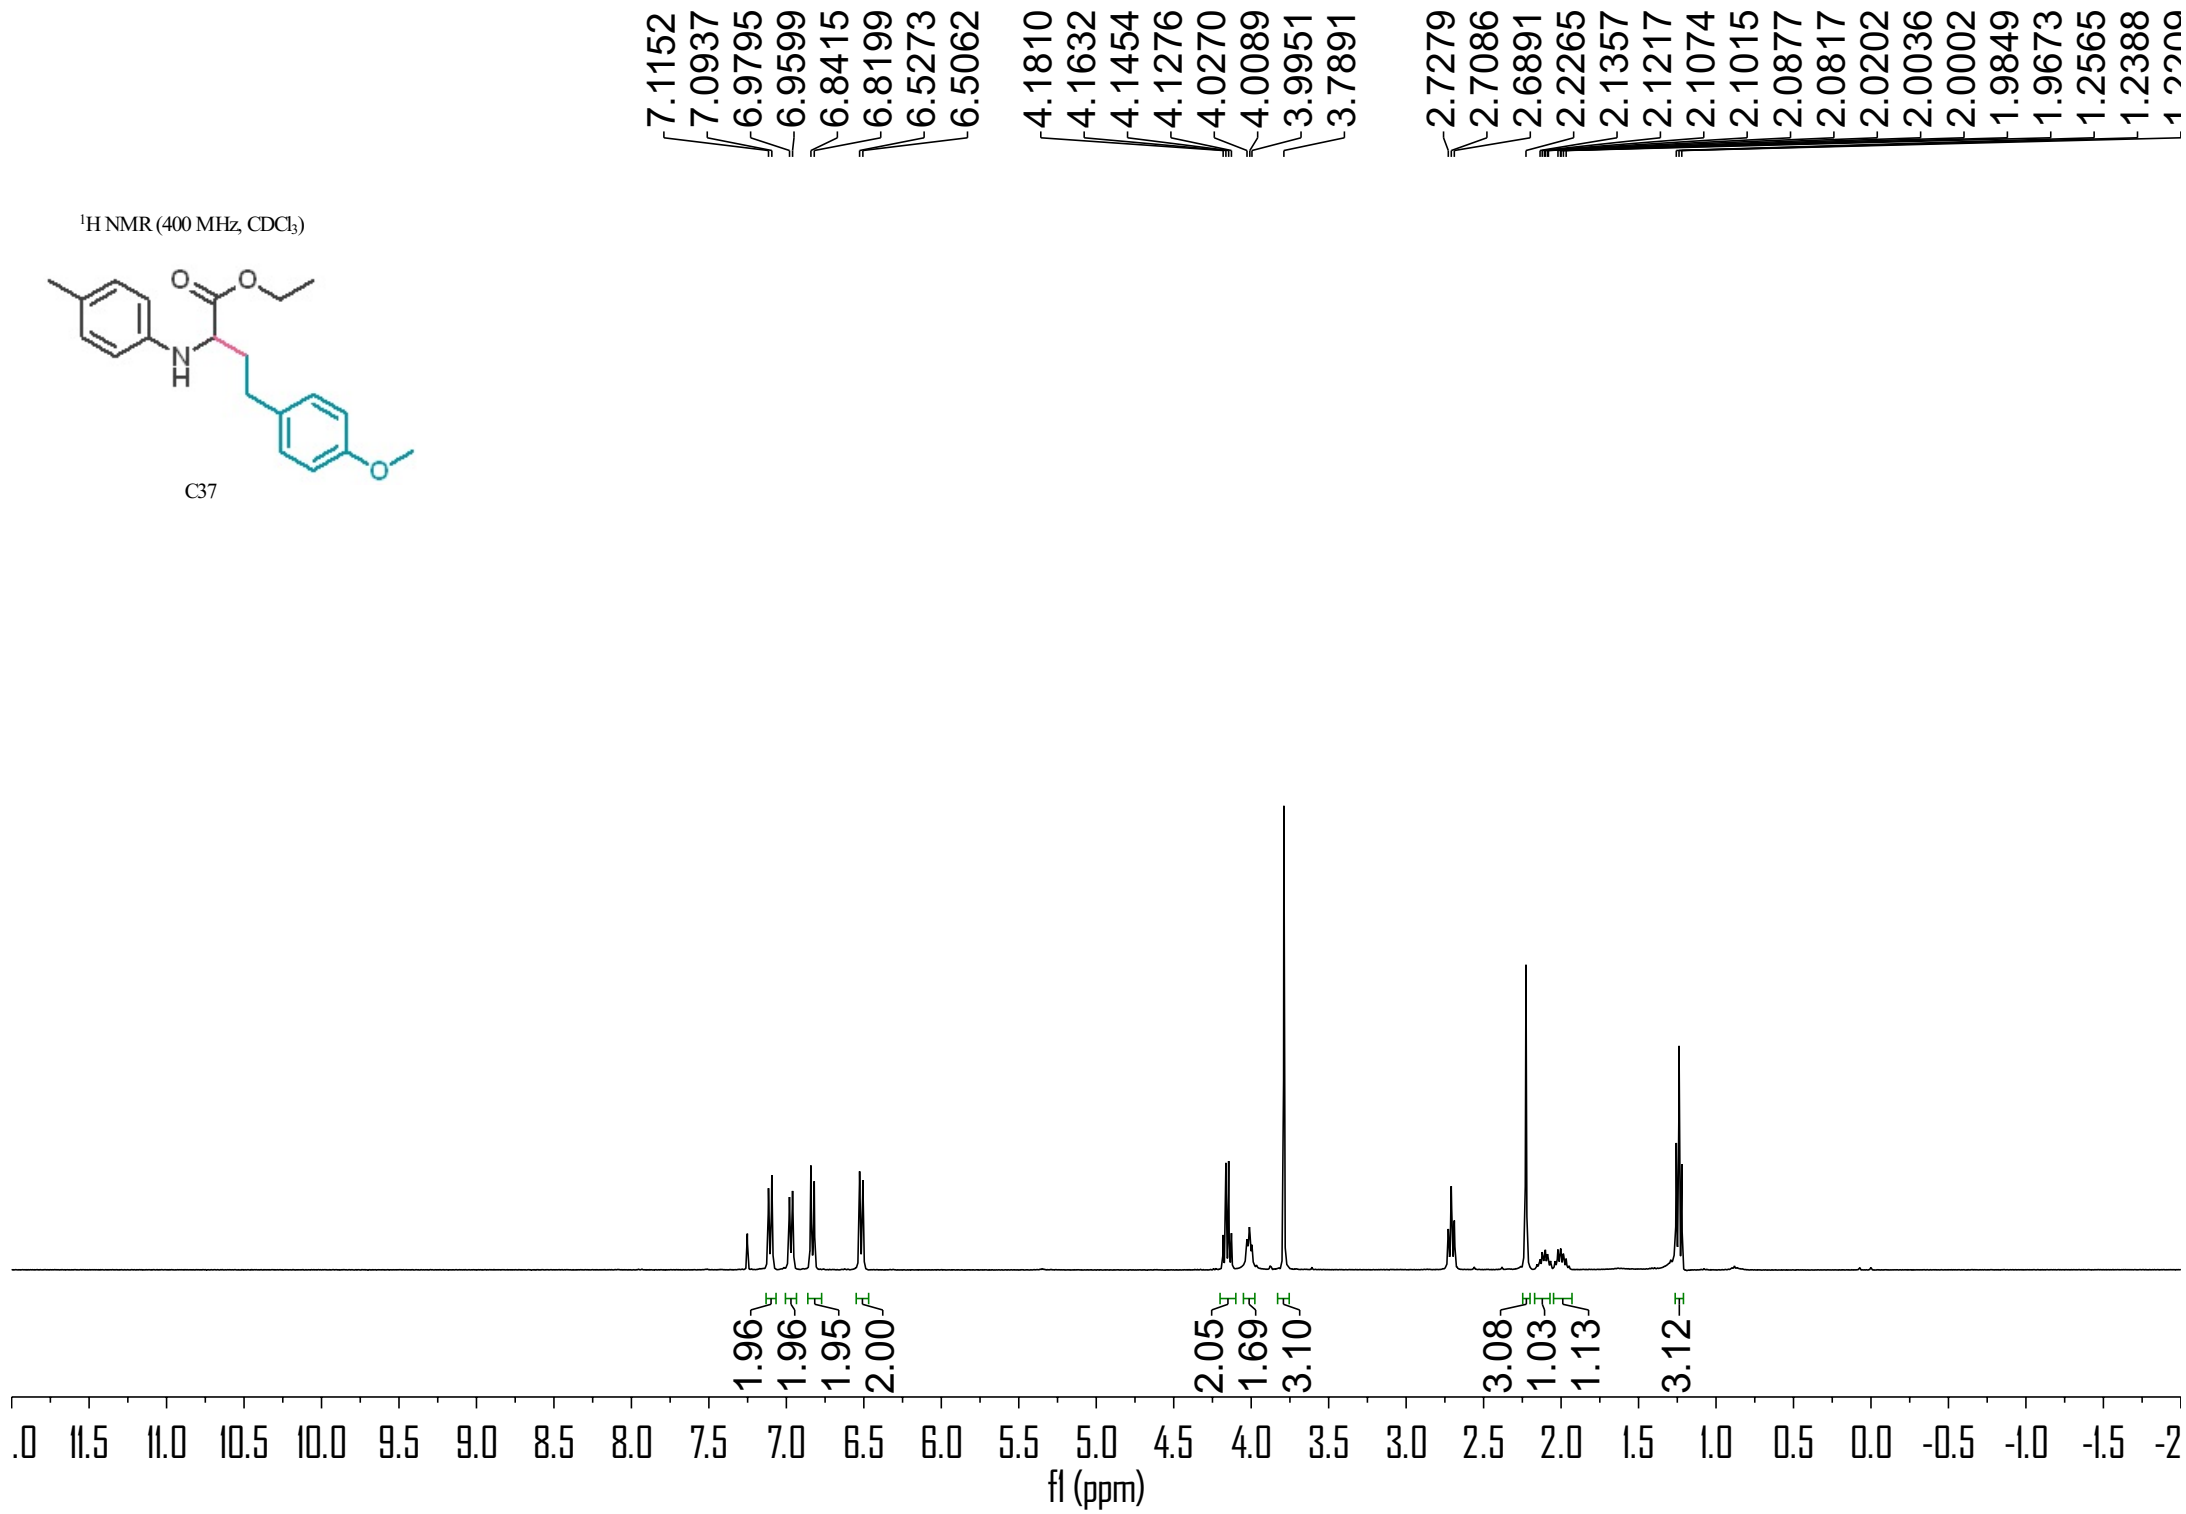

<sup>1</sup>H NMR (400 MHz, CDCl<sub>3</sub>)

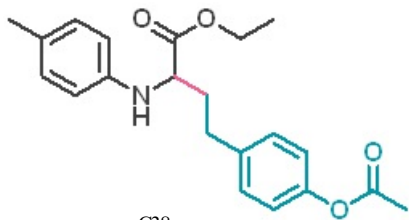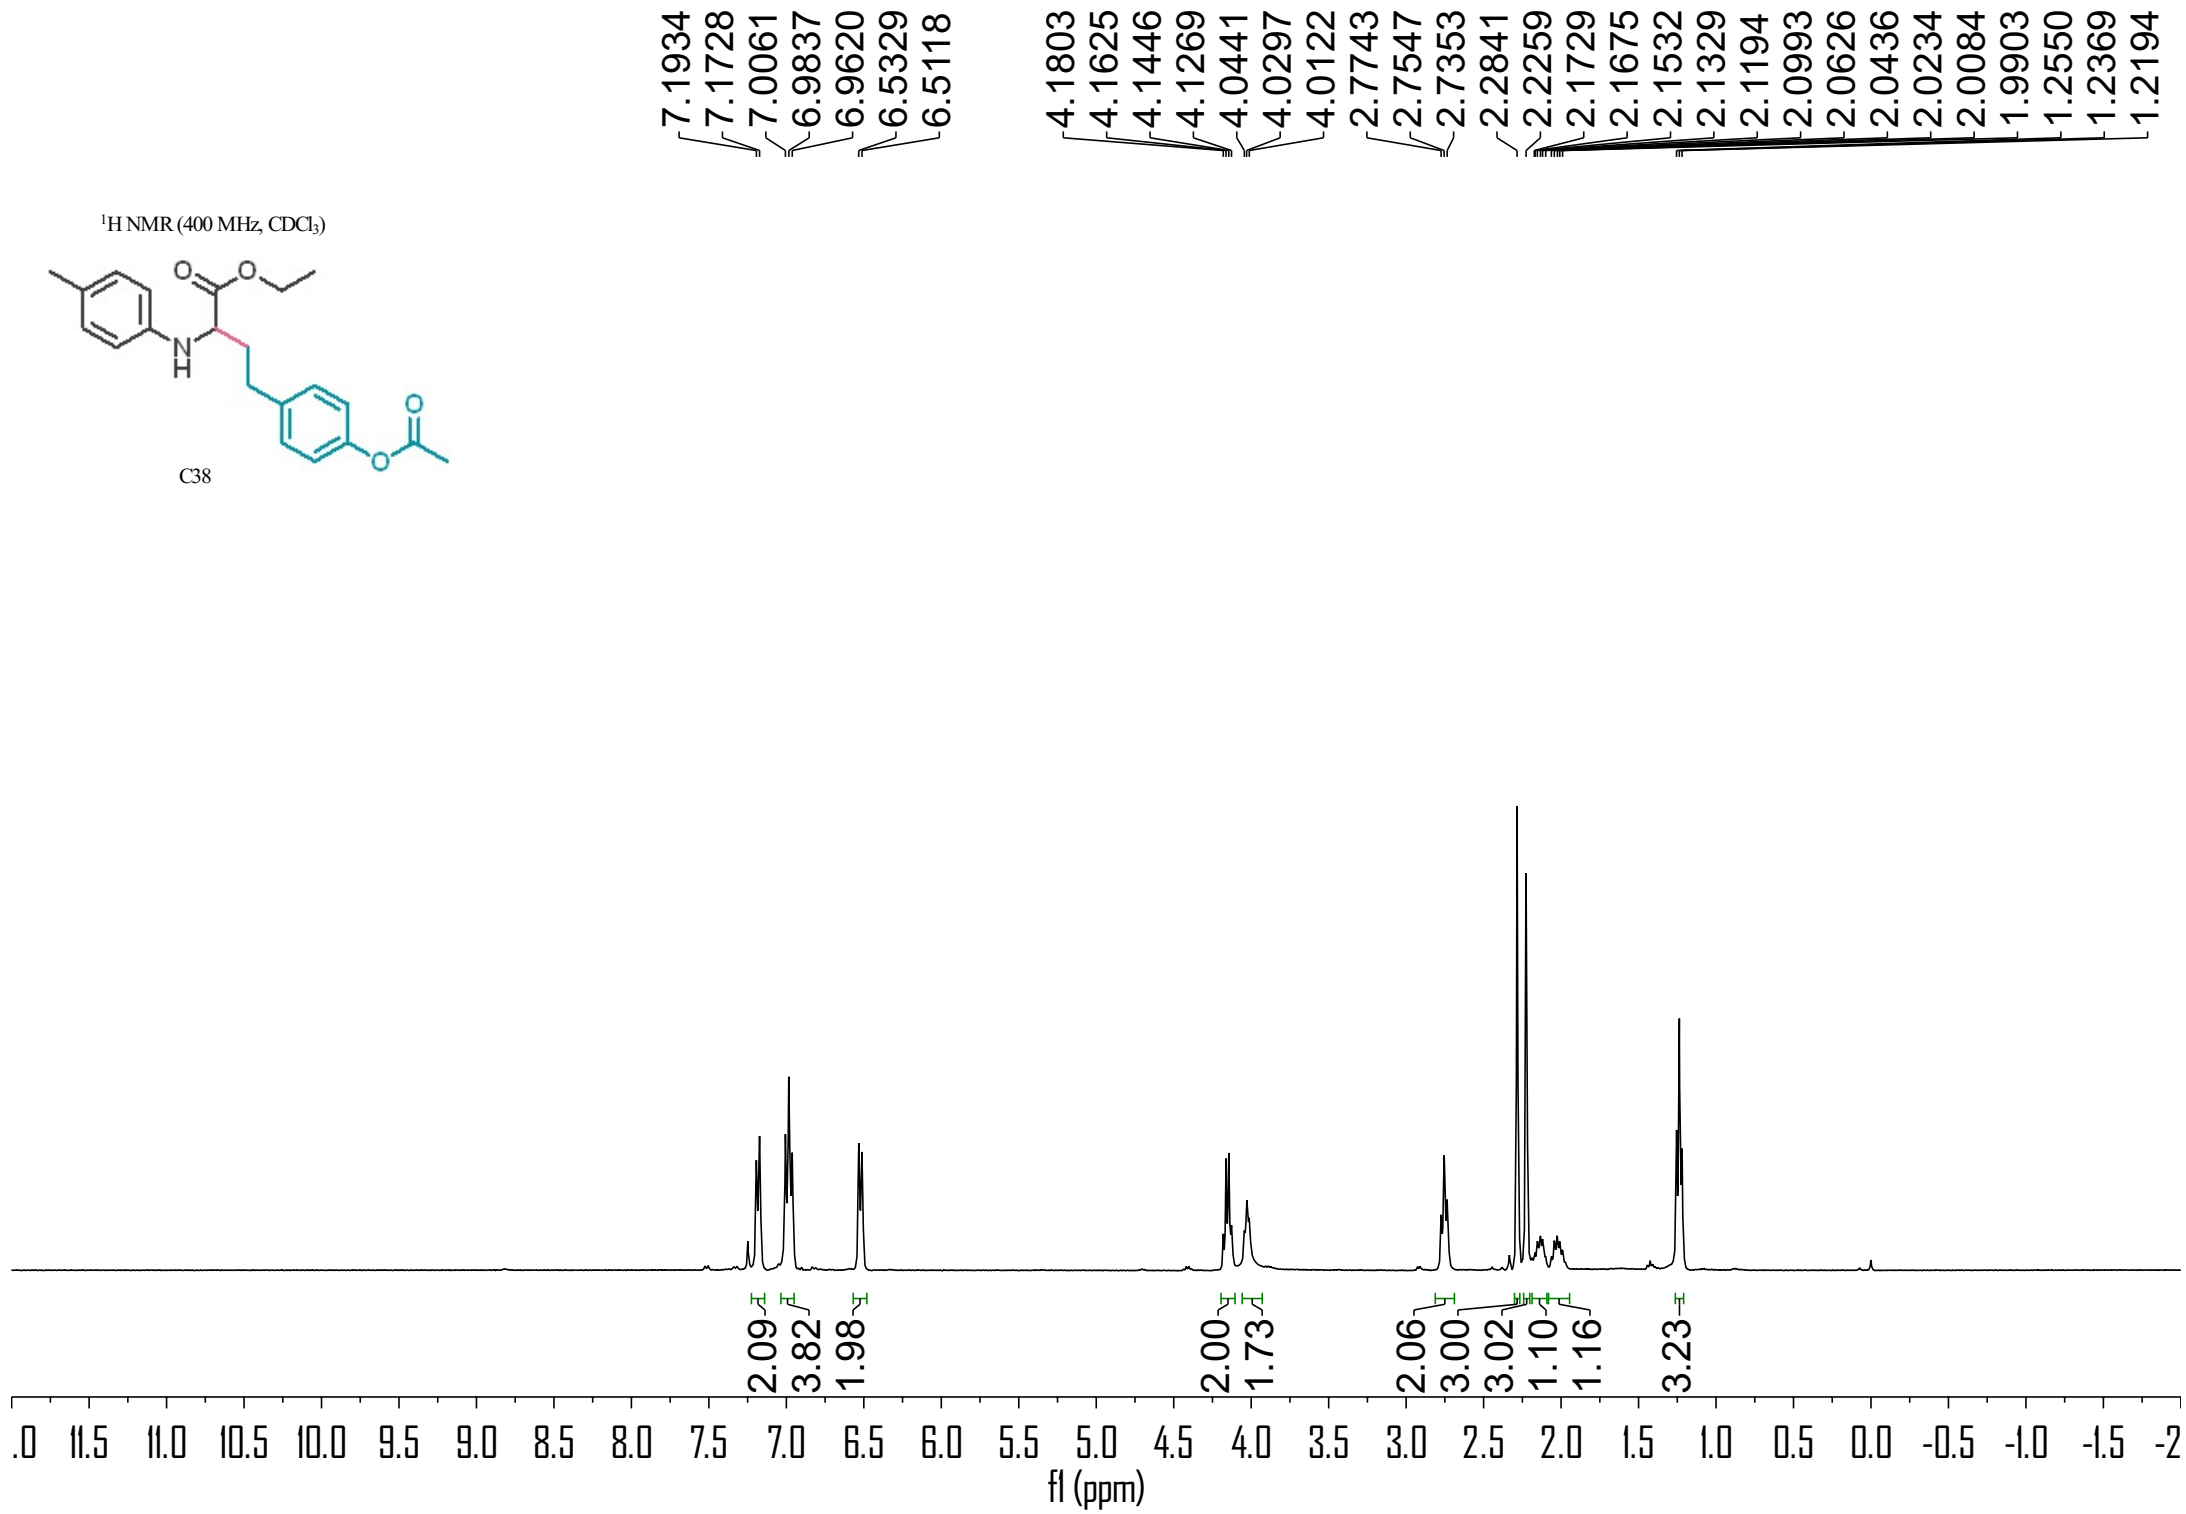



7.2971  
7.2837  
7.1404  
7.1285  
6.9678  
6.9545  
6.9116  
6.8975  
6.5157  
6.5017  
4.1570  
4.1452  
4.1333  
4.1215  
3.9989  
3.9364  
3.9246  
3.9126  
3.9006  
2.7411  
2.7302  
2.7164  
2.4724  
2.4604  
2.2198  
2.1385  
2.1250  
2.1127  
2.1018  
2.0832  
2.0185  
2.0080  
1.9966  
1.9846  
1.9611  
1.8859  
1.8746  
1.8634  
1.8521  
1.8409  
1.5996  
1.5877  
1.2342  
1.2223  
1.2105  
0.9121  
0.9012

<sup>1</sup>H NMR (600 MHz, CDCl<sub>3</sub>)

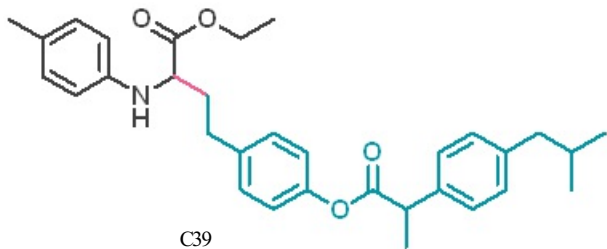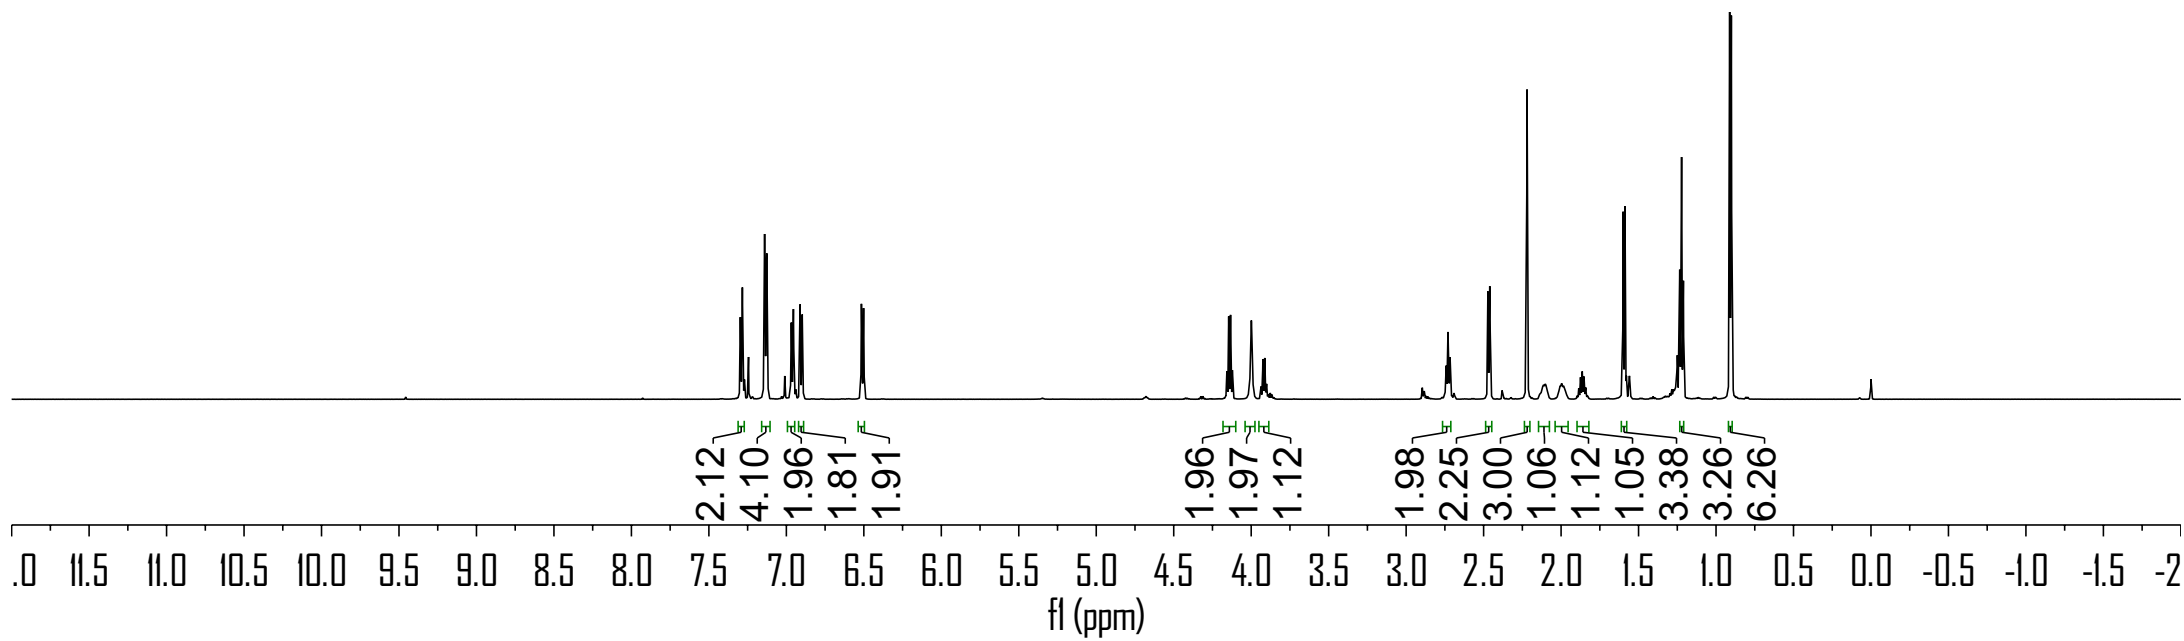

7.2201  
7.2068  
6.9882  
6.9783  
6.9647  
6.9233  
6.5330  
6.5191  
4.1727  
4.1692  
4.1609  
4.1572  
4.0347  
2.8824  
2.8726  
2.8664  
2.7146  
2.7015  
2.6882  
2.4806  
2.2288  
2.1589  
2.1436  
2.1413  
2.1271  
2.0342  
2.0273  
2.0226  
2.0199  
2.0114  
2.0078  
2.0030  
1.9984  
1.9732  
1.6275  
1.6117  
1.5972  
1.5925  
1.5435  
1.5345  
1.5281  
1.5256  
1.5223  
1.5162  
1.5129  
1.5058  
1.2551  
1.2432  
1.2313  
0.9101

<sup>1</sup>H NMR (600 MHz, CDCl<sub>3</sub>)

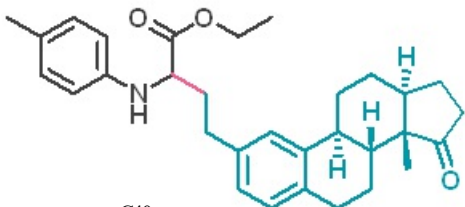

C40

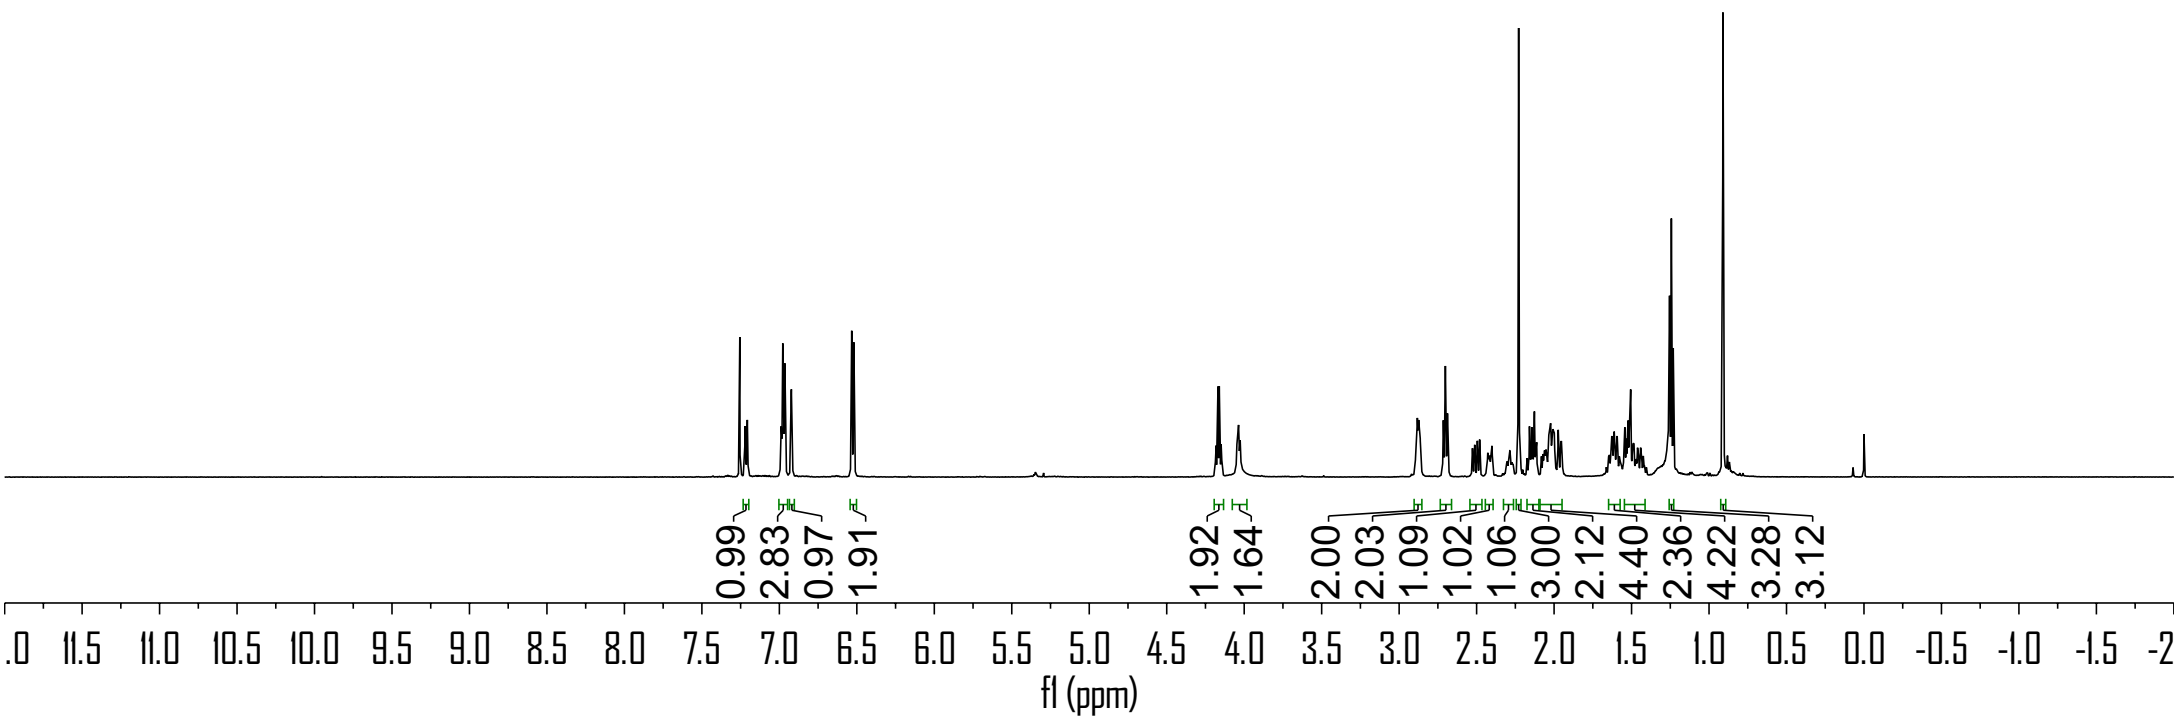

<sup>1</sup>H NMR (600 MHz, CDCl<sub>3</sub>)

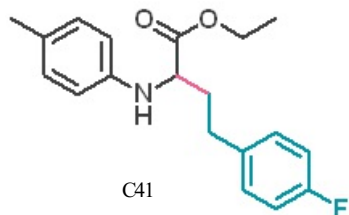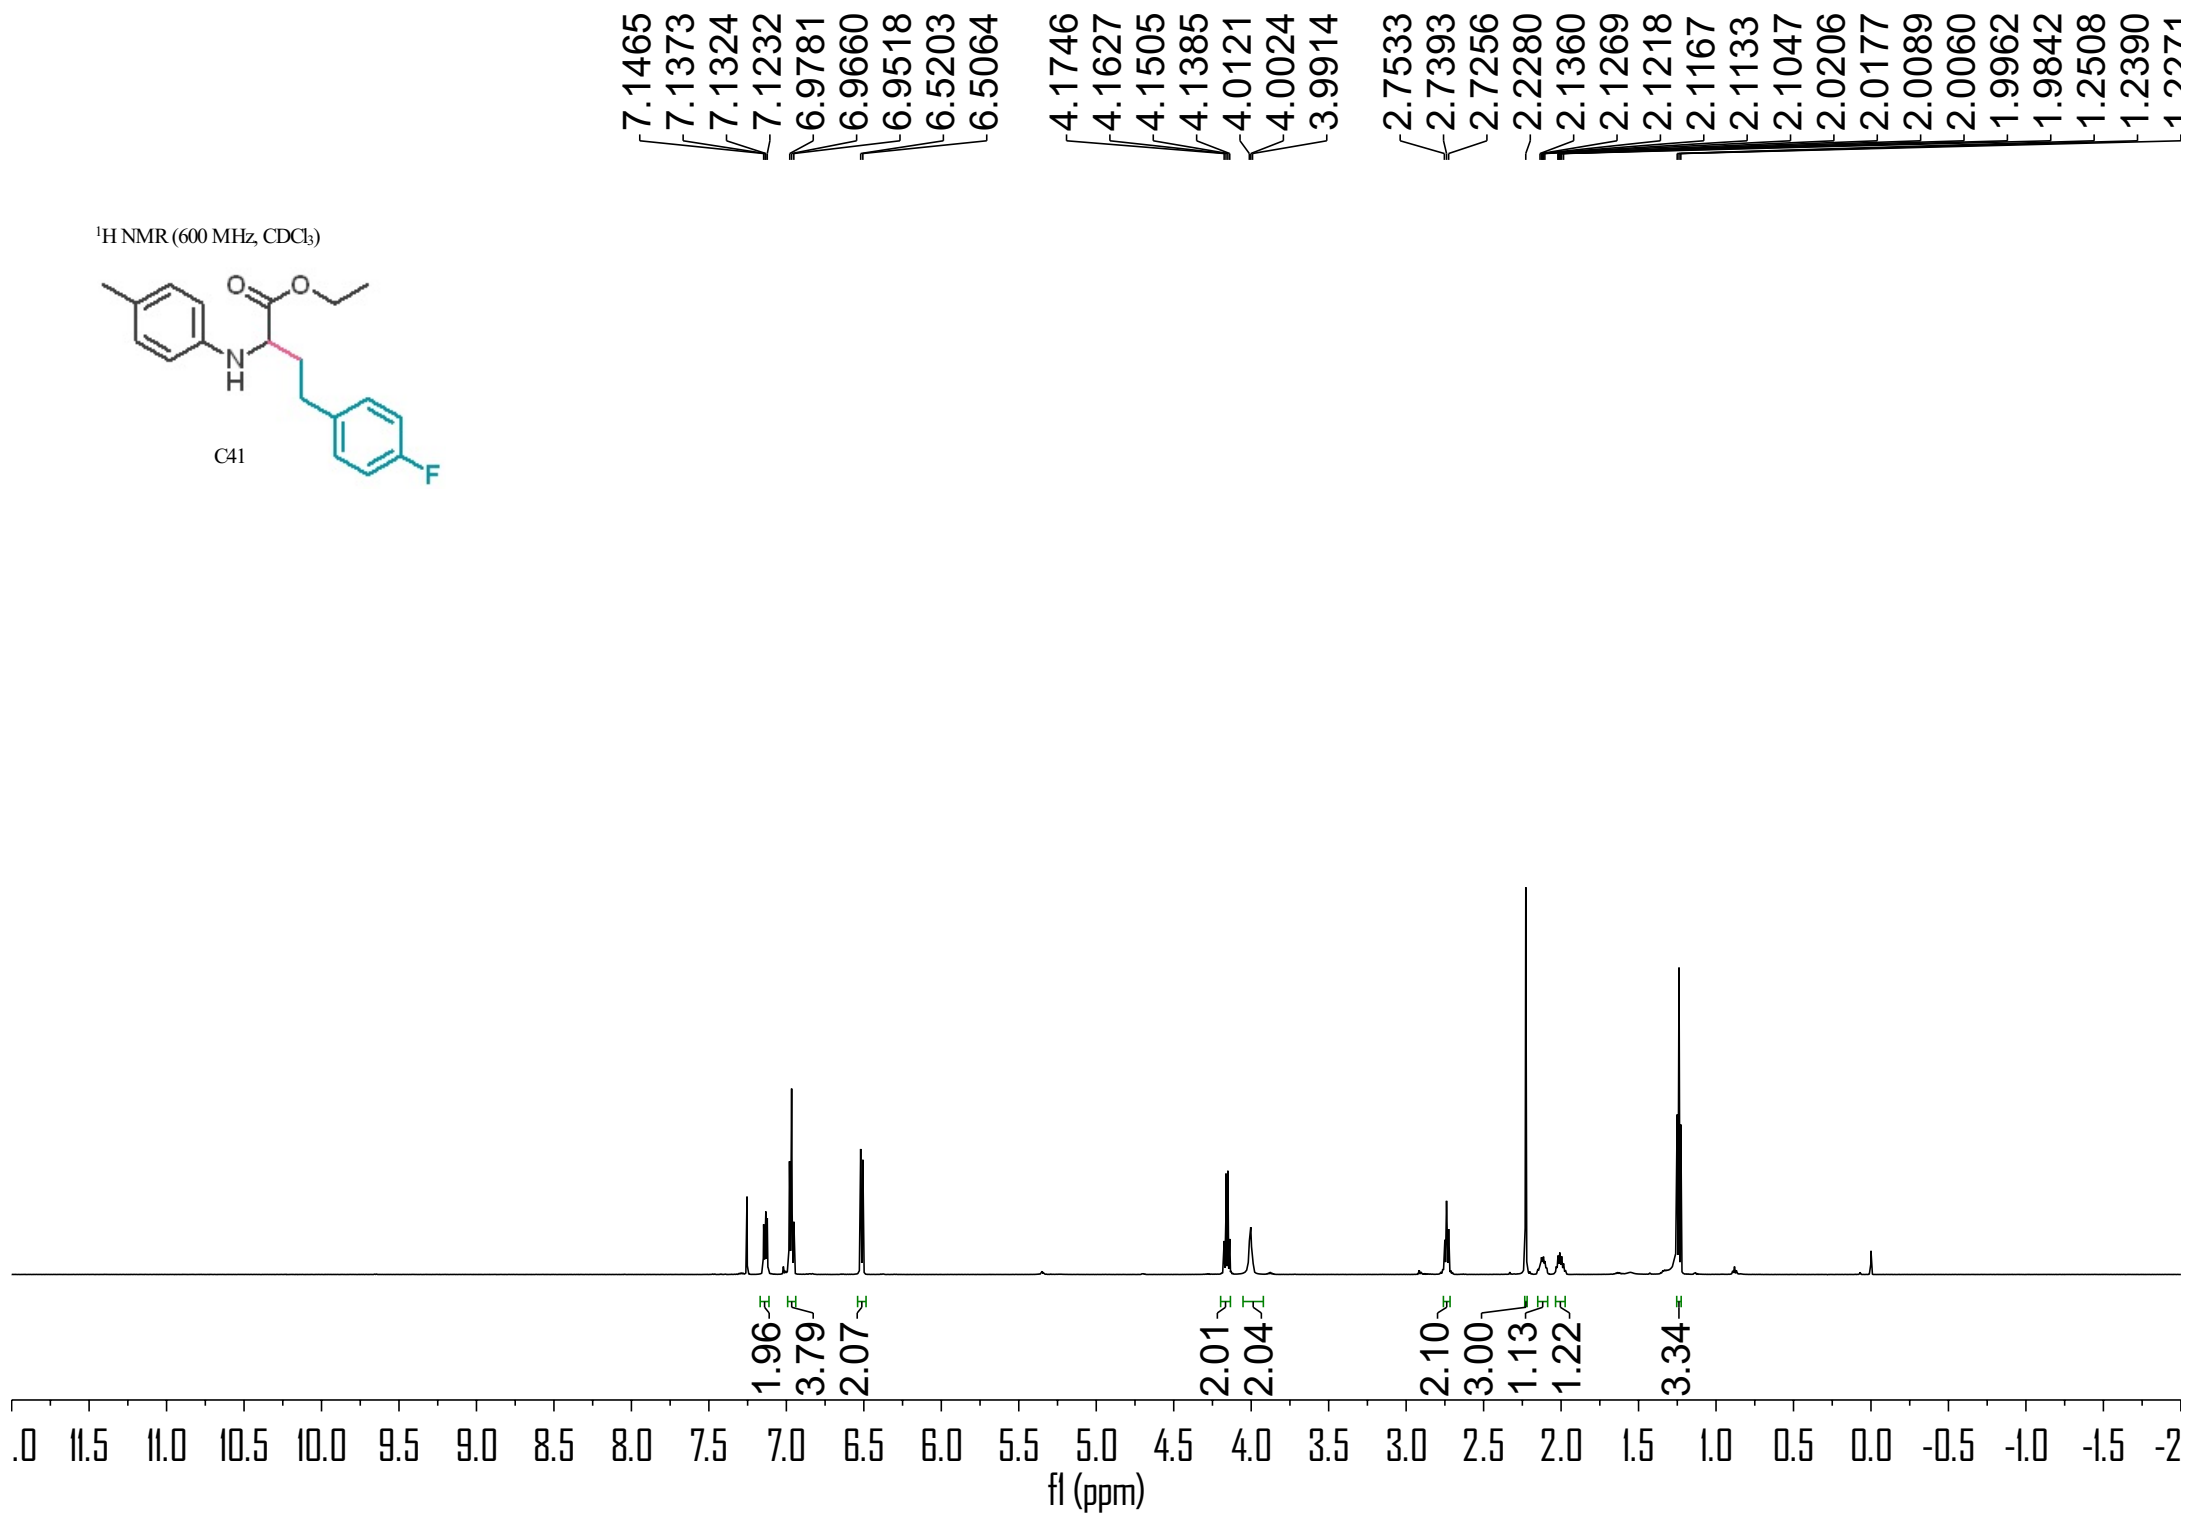

<sup>1</sup>H NMR (400 MHz, CDCl<sub>3</sub>)

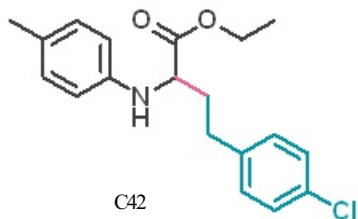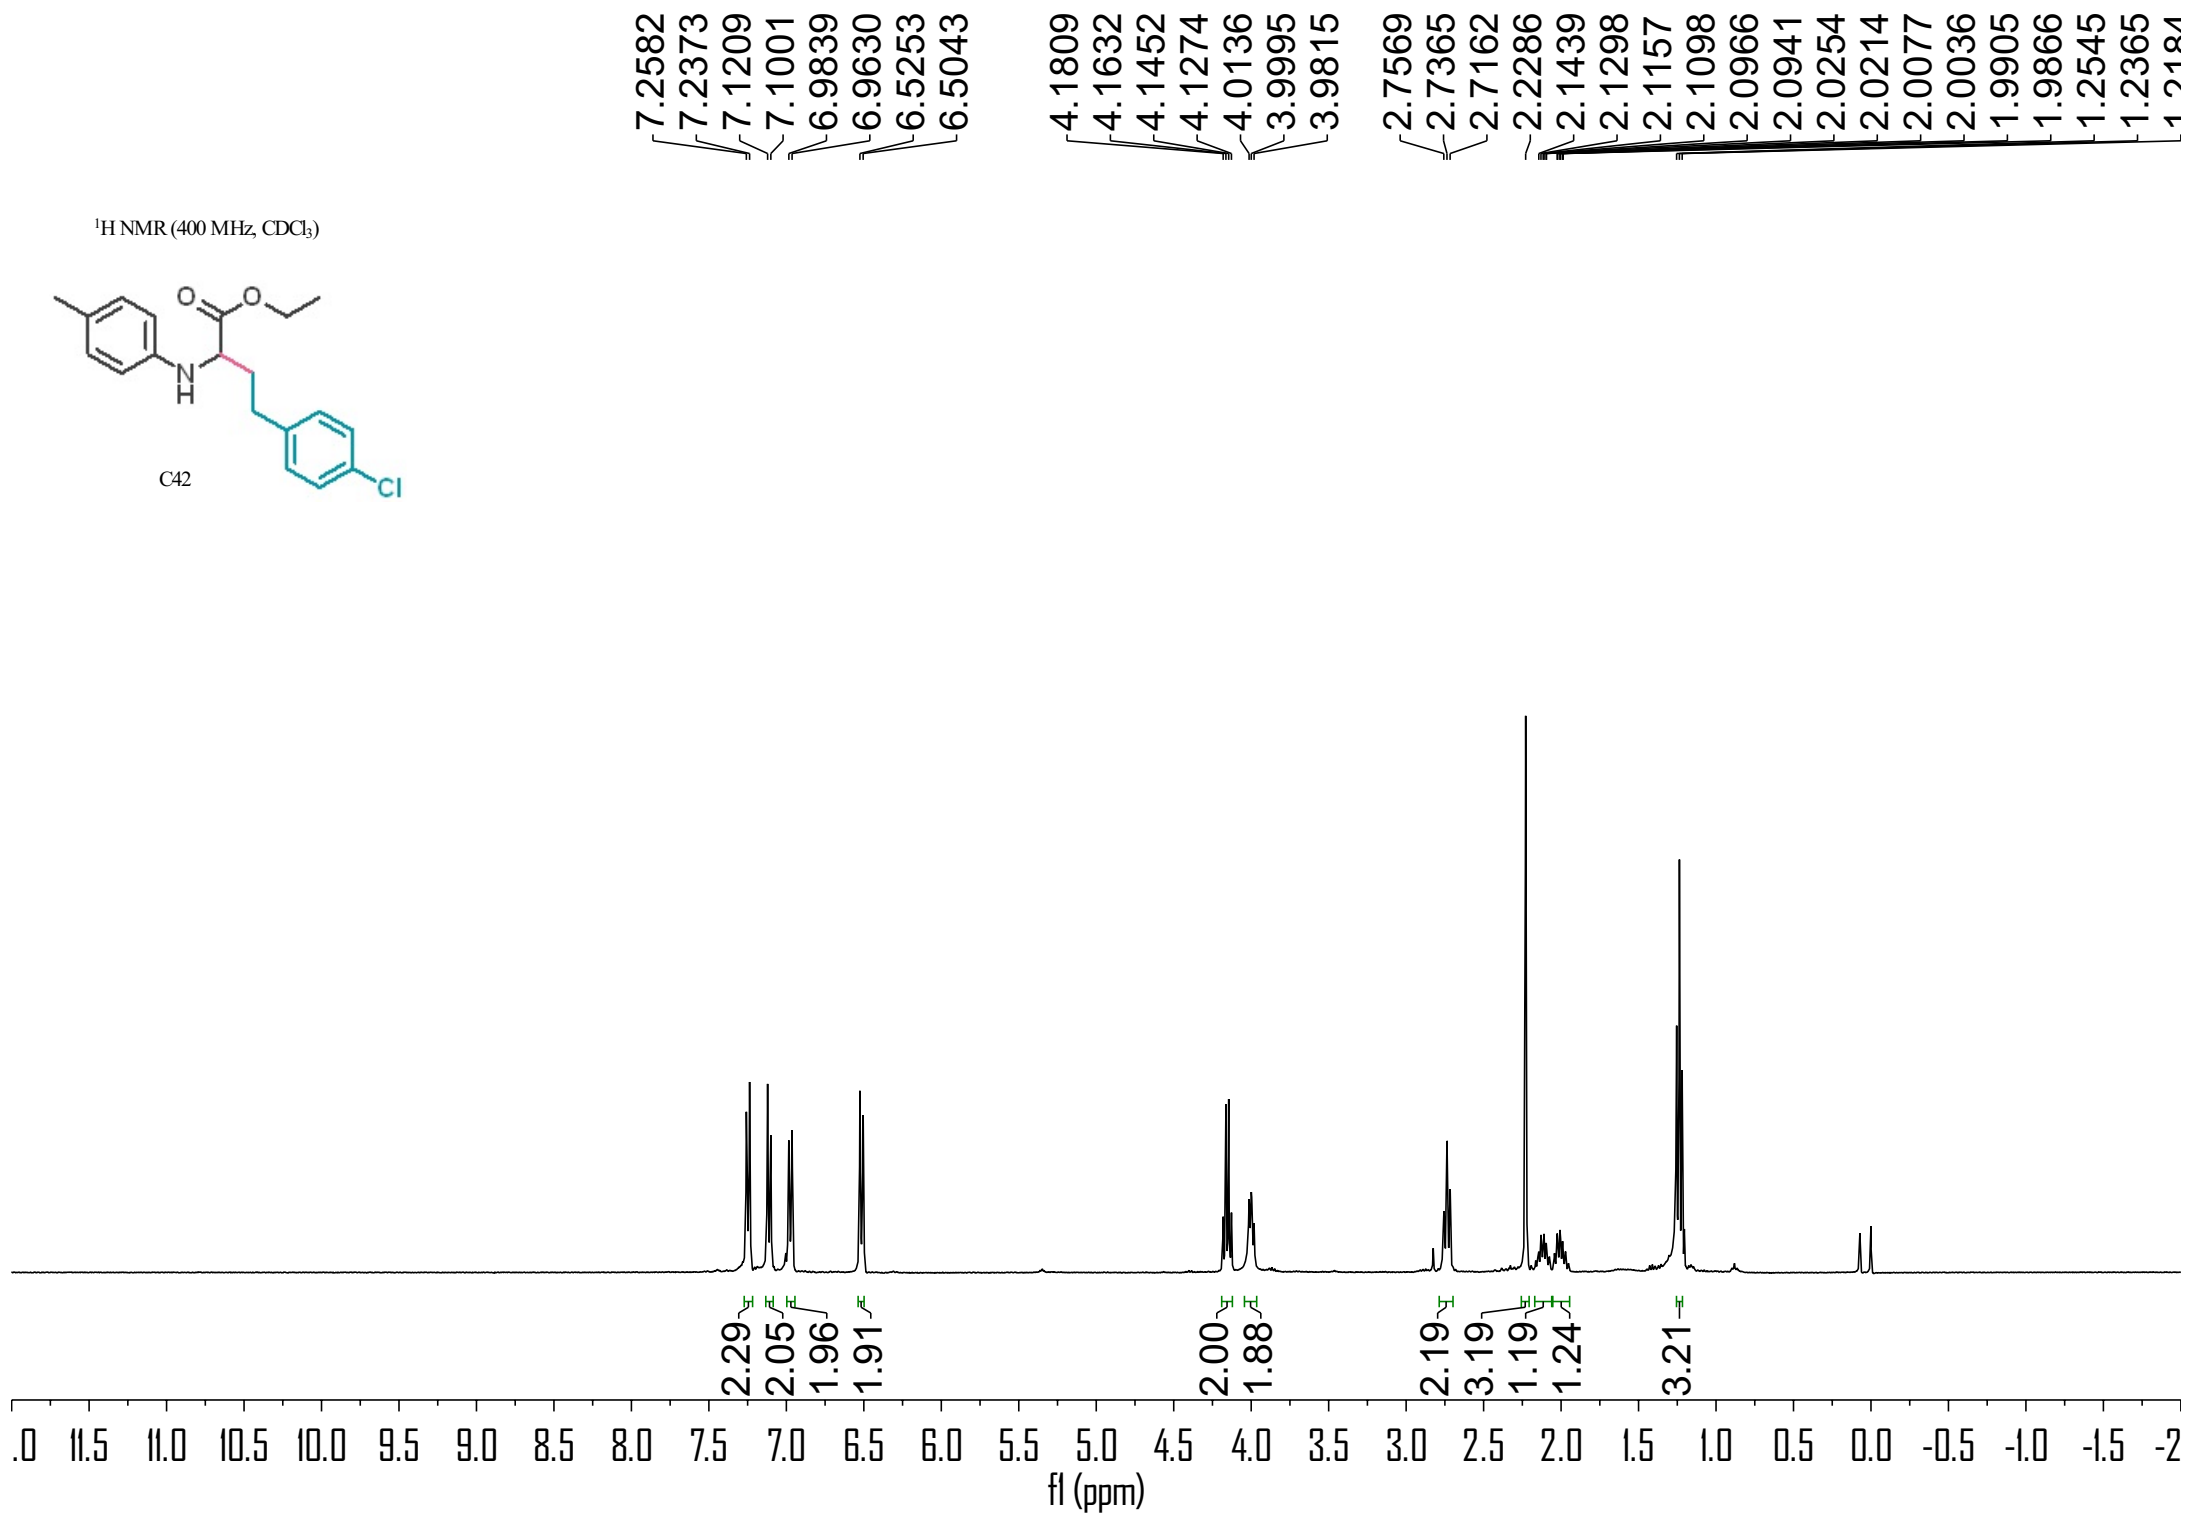

<sup>1</sup>H NMR (400 MHz, CDCl<sub>3</sub>)

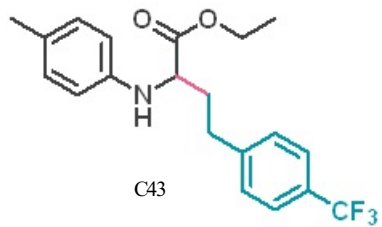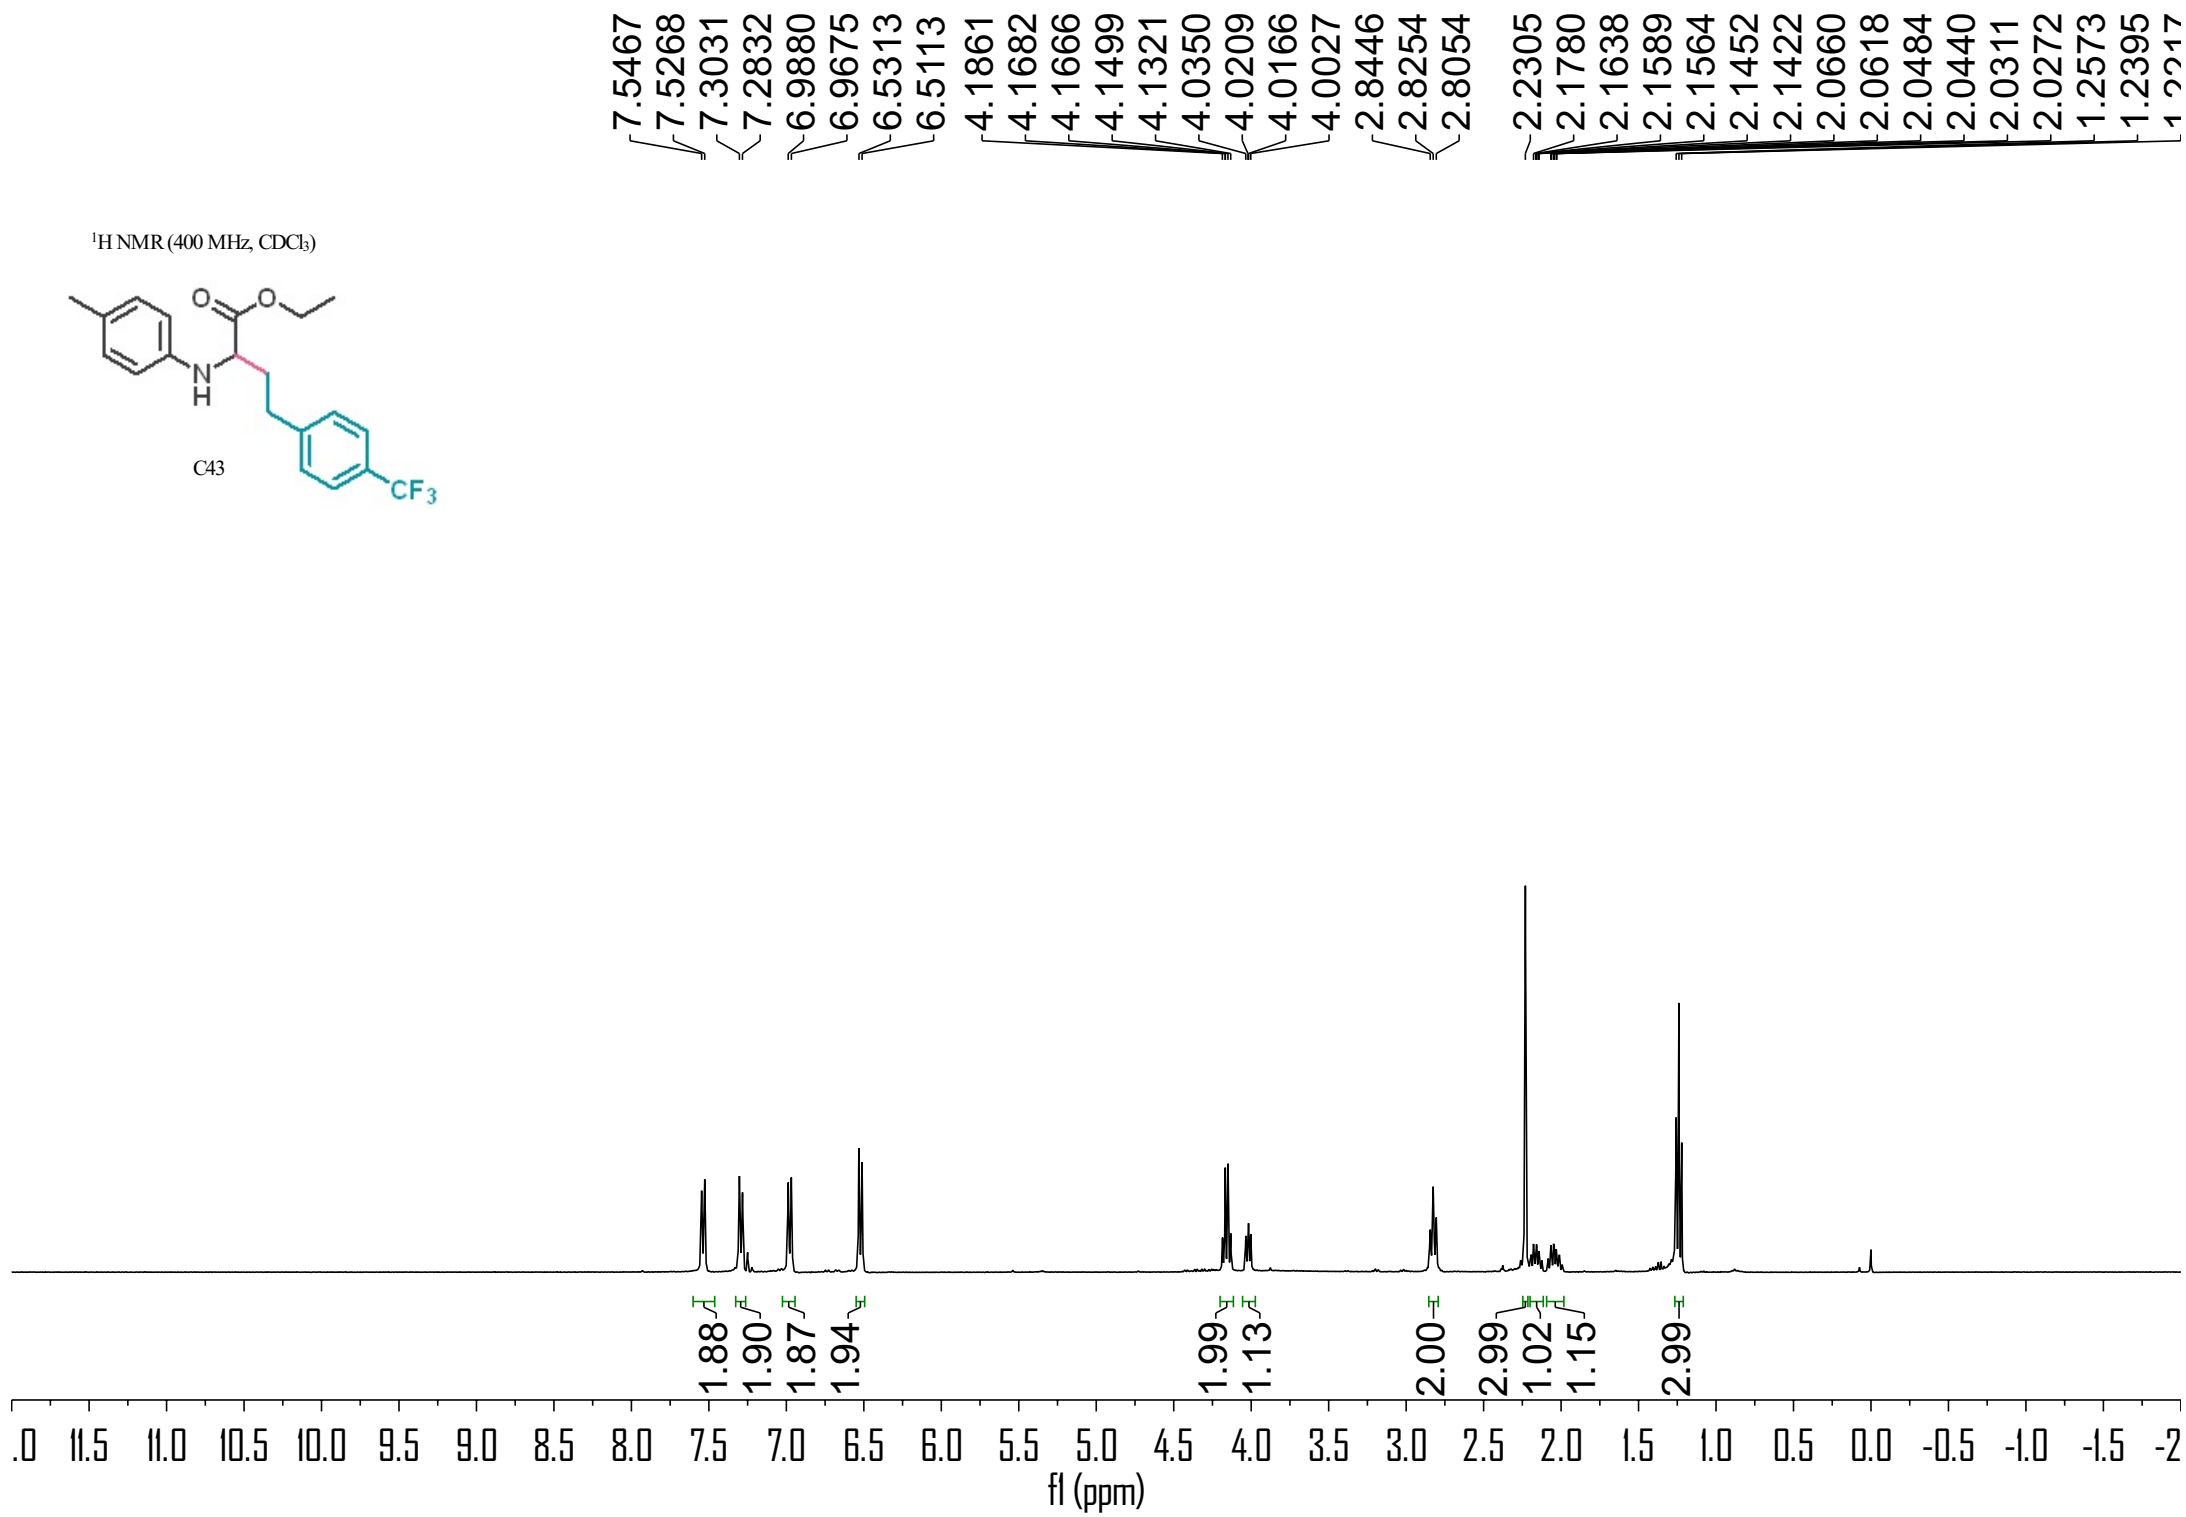

7.9624  
7.9485  
7.2570  
7.2433  
6.9776  
6.9641  
6.5270  
6.5129  
4.1732  
4.1615  
4.1495  
4.1375  
4.0214  
4.0120  
4.0091  
3.9998  
3.9013  
2.8341  
2.8293  
2.8188  
2.8072  
2.2260  
2.1917  
2.1824  
2.1792  
2.1773  
2.1687  
2.1646  
2.1594  
2.1564  
2.1542  
2.1474  
2.1445  
2.1418  
2.1326  
2.0724  
2.0612  
2.0580  
2.0493  
2.0458  
2.0380  
2.0348  
2.0259  
2.0233  
2.0118  
1.2485  
1.2366  
1.2248

<sup>1</sup>H NMR (600 MHz, CDCl<sub>3</sub>)

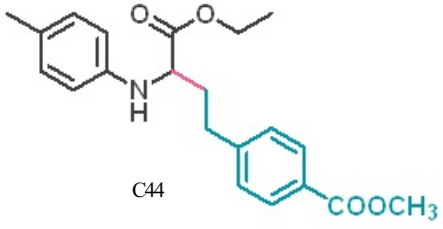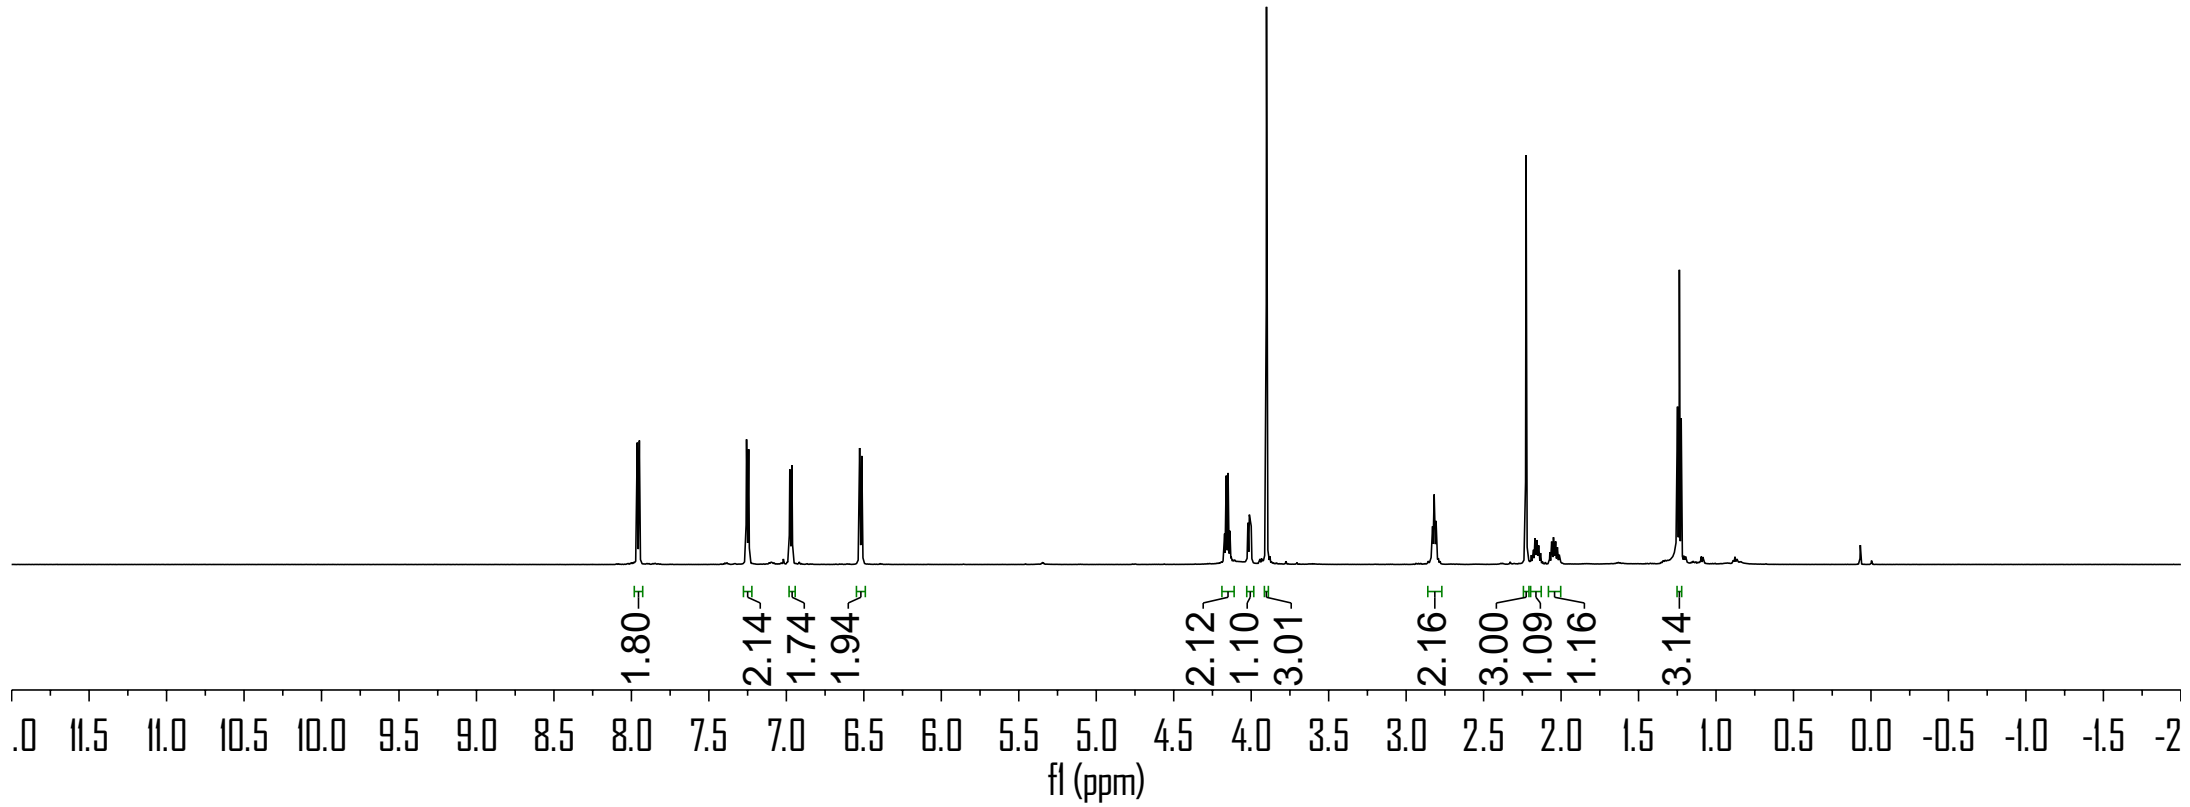

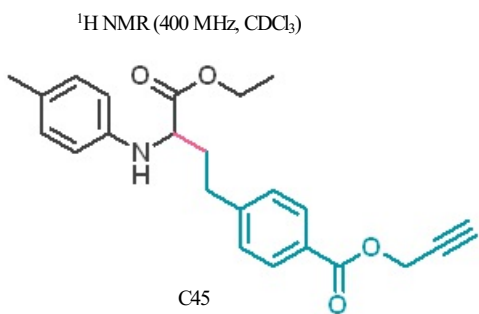

8.0029  
7.9822  
7.2786  
7.2577  
6.9876  
6.9672  
6.5316  
6.5107

4.9183  
4.9122

4.1876  
4.1698  
4.1519  
4.1342  
4.0285  
4.0132  
4.0091  
3.9957  
2.8471  
2.8308  
2.8103  
2.5177  
2.5116  
2.5054  
2.2310  
2.1754  
2.1554  
2.0683  
2.0514  
2.0324  
1.2600  
1.2423  
1.2241

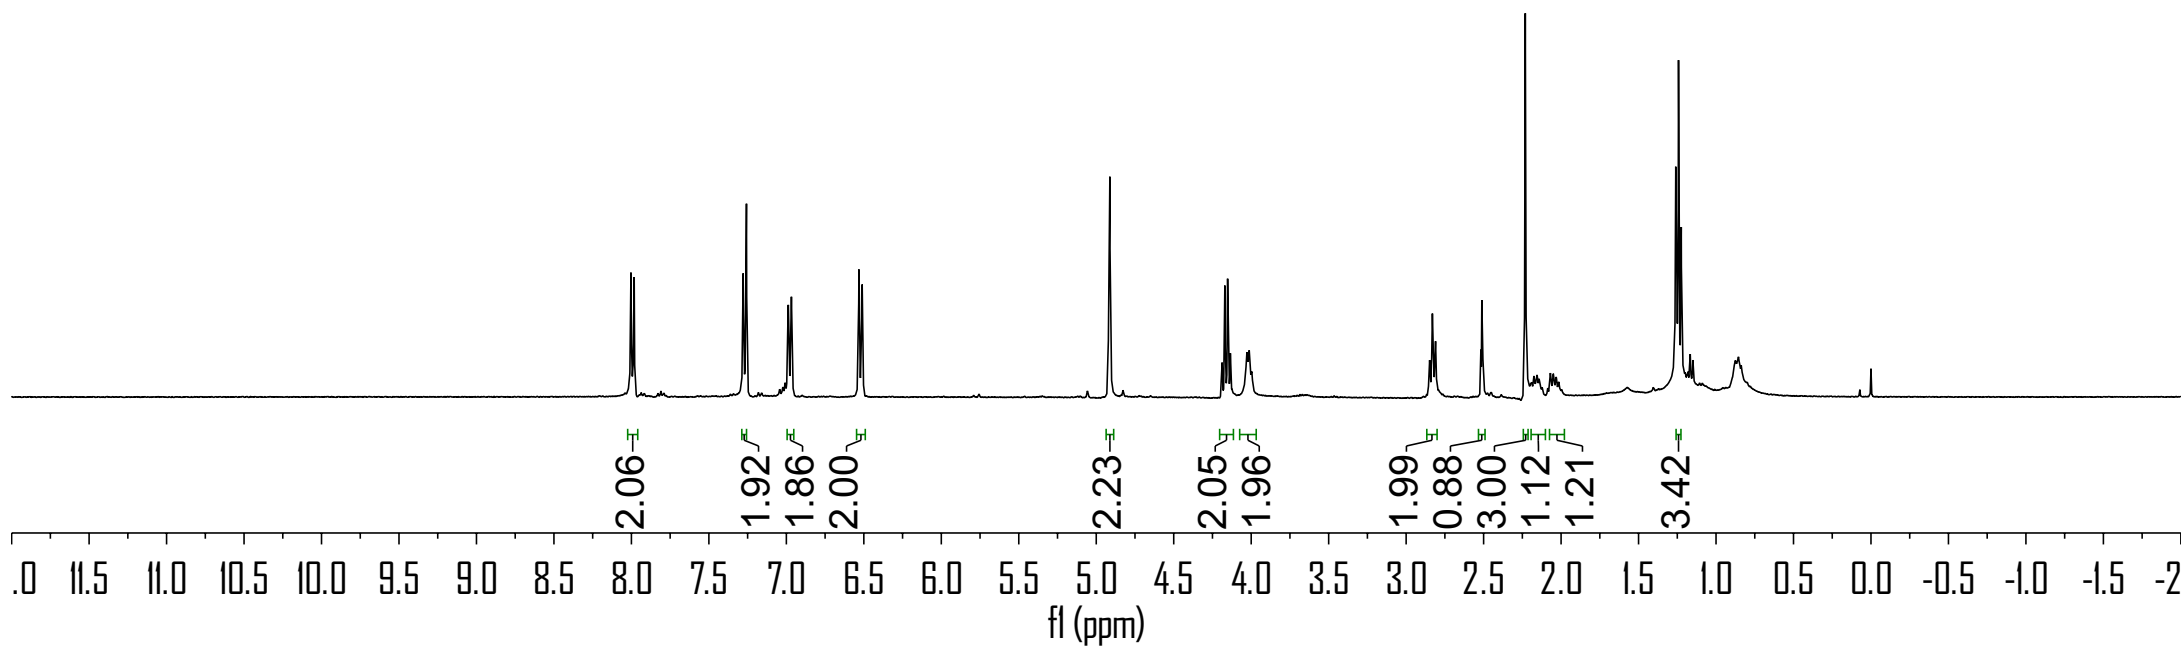

<sup>1</sup>H NMR (400 MHz, CDCl<sub>3</sub>)

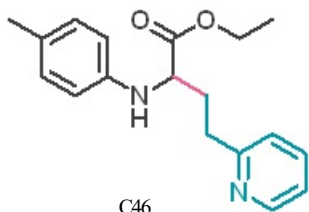

8.5485  
8.5378  
7.5982  
7.5936  
7.5791  
7.5744  
7.5600  
7.5553  
7.1475  
7.1283  
7.1188  
7.1008  
6.9744  
6.9543  
6.5379  
6.5170  
4.1892  
4.1622  
4.1554  
4.1444  
4.1378  
4.1200  
4.0514

2.9769  
2.9708  
2.9601  
2.9541  
2.9491  
2.9348  
2.3533  
2.3359  
2.3184  
2.3010  
2.2839  
2.2662  
2.2212  
2.1967  
2.1776  
2.1617  
1.2500  
1.2321  
1.2141

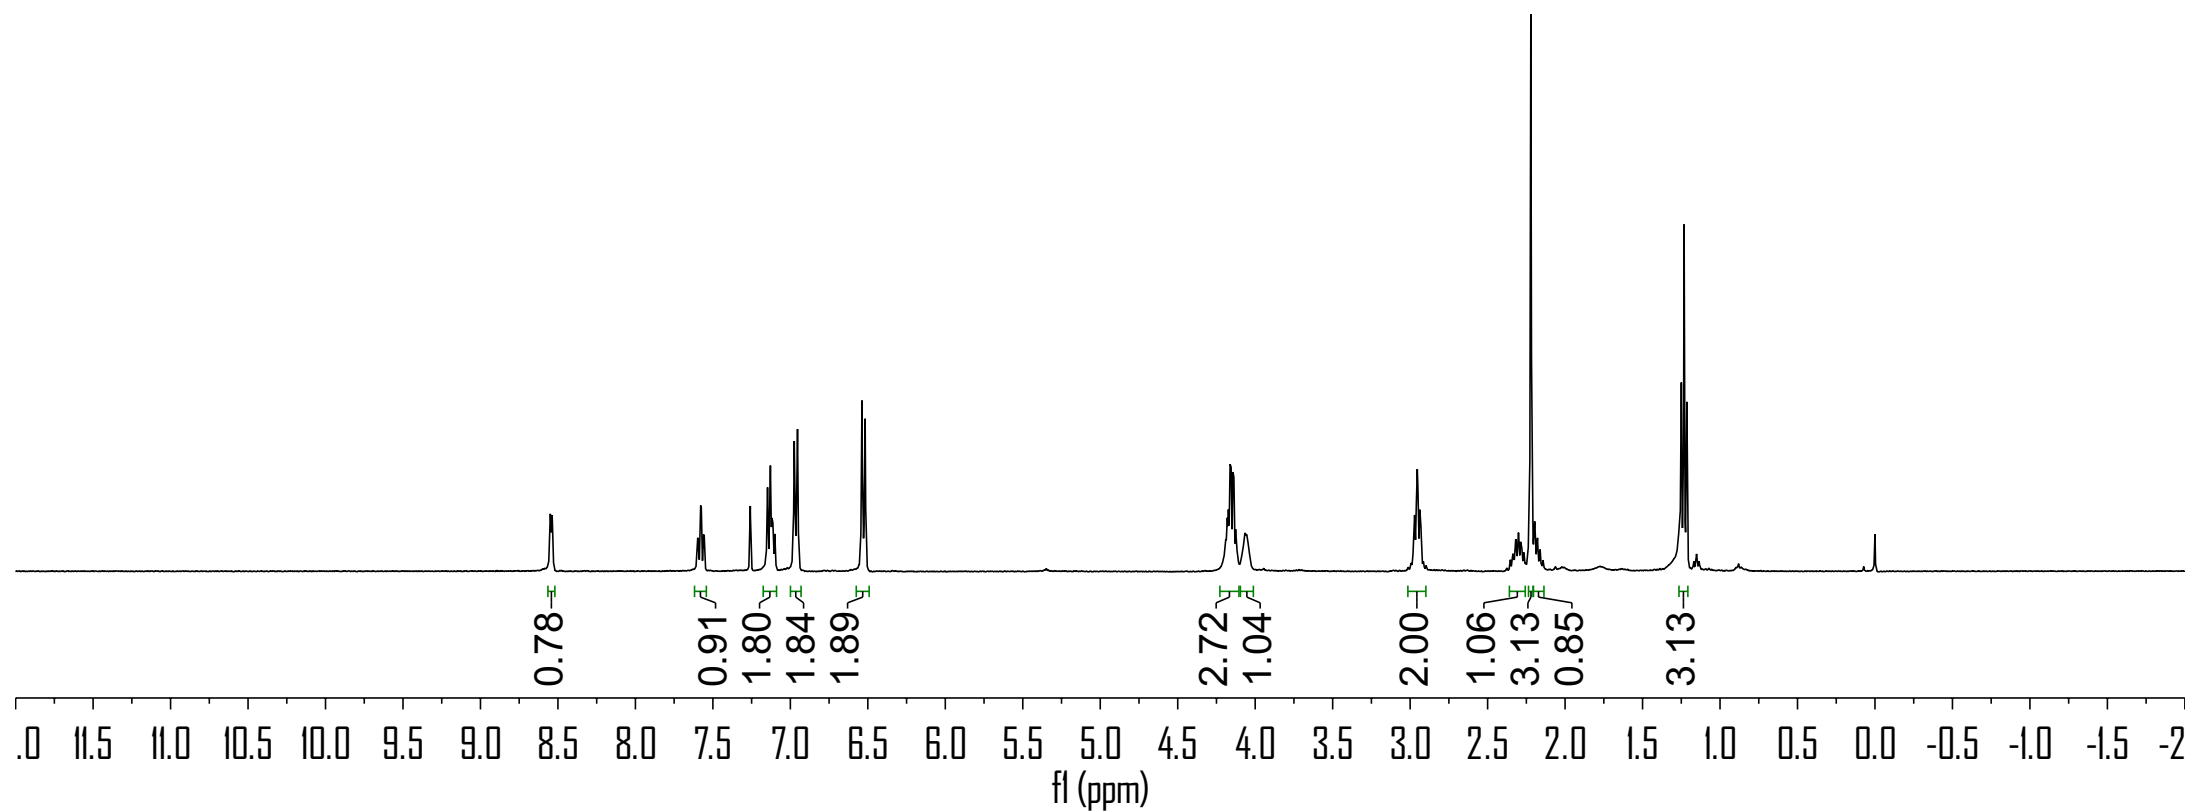



<sup>1</sup>H NMR (400 MHz, CDCl<sub>3</sub>)

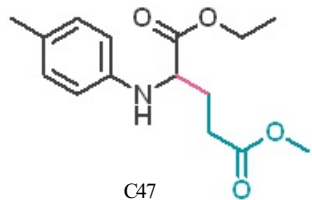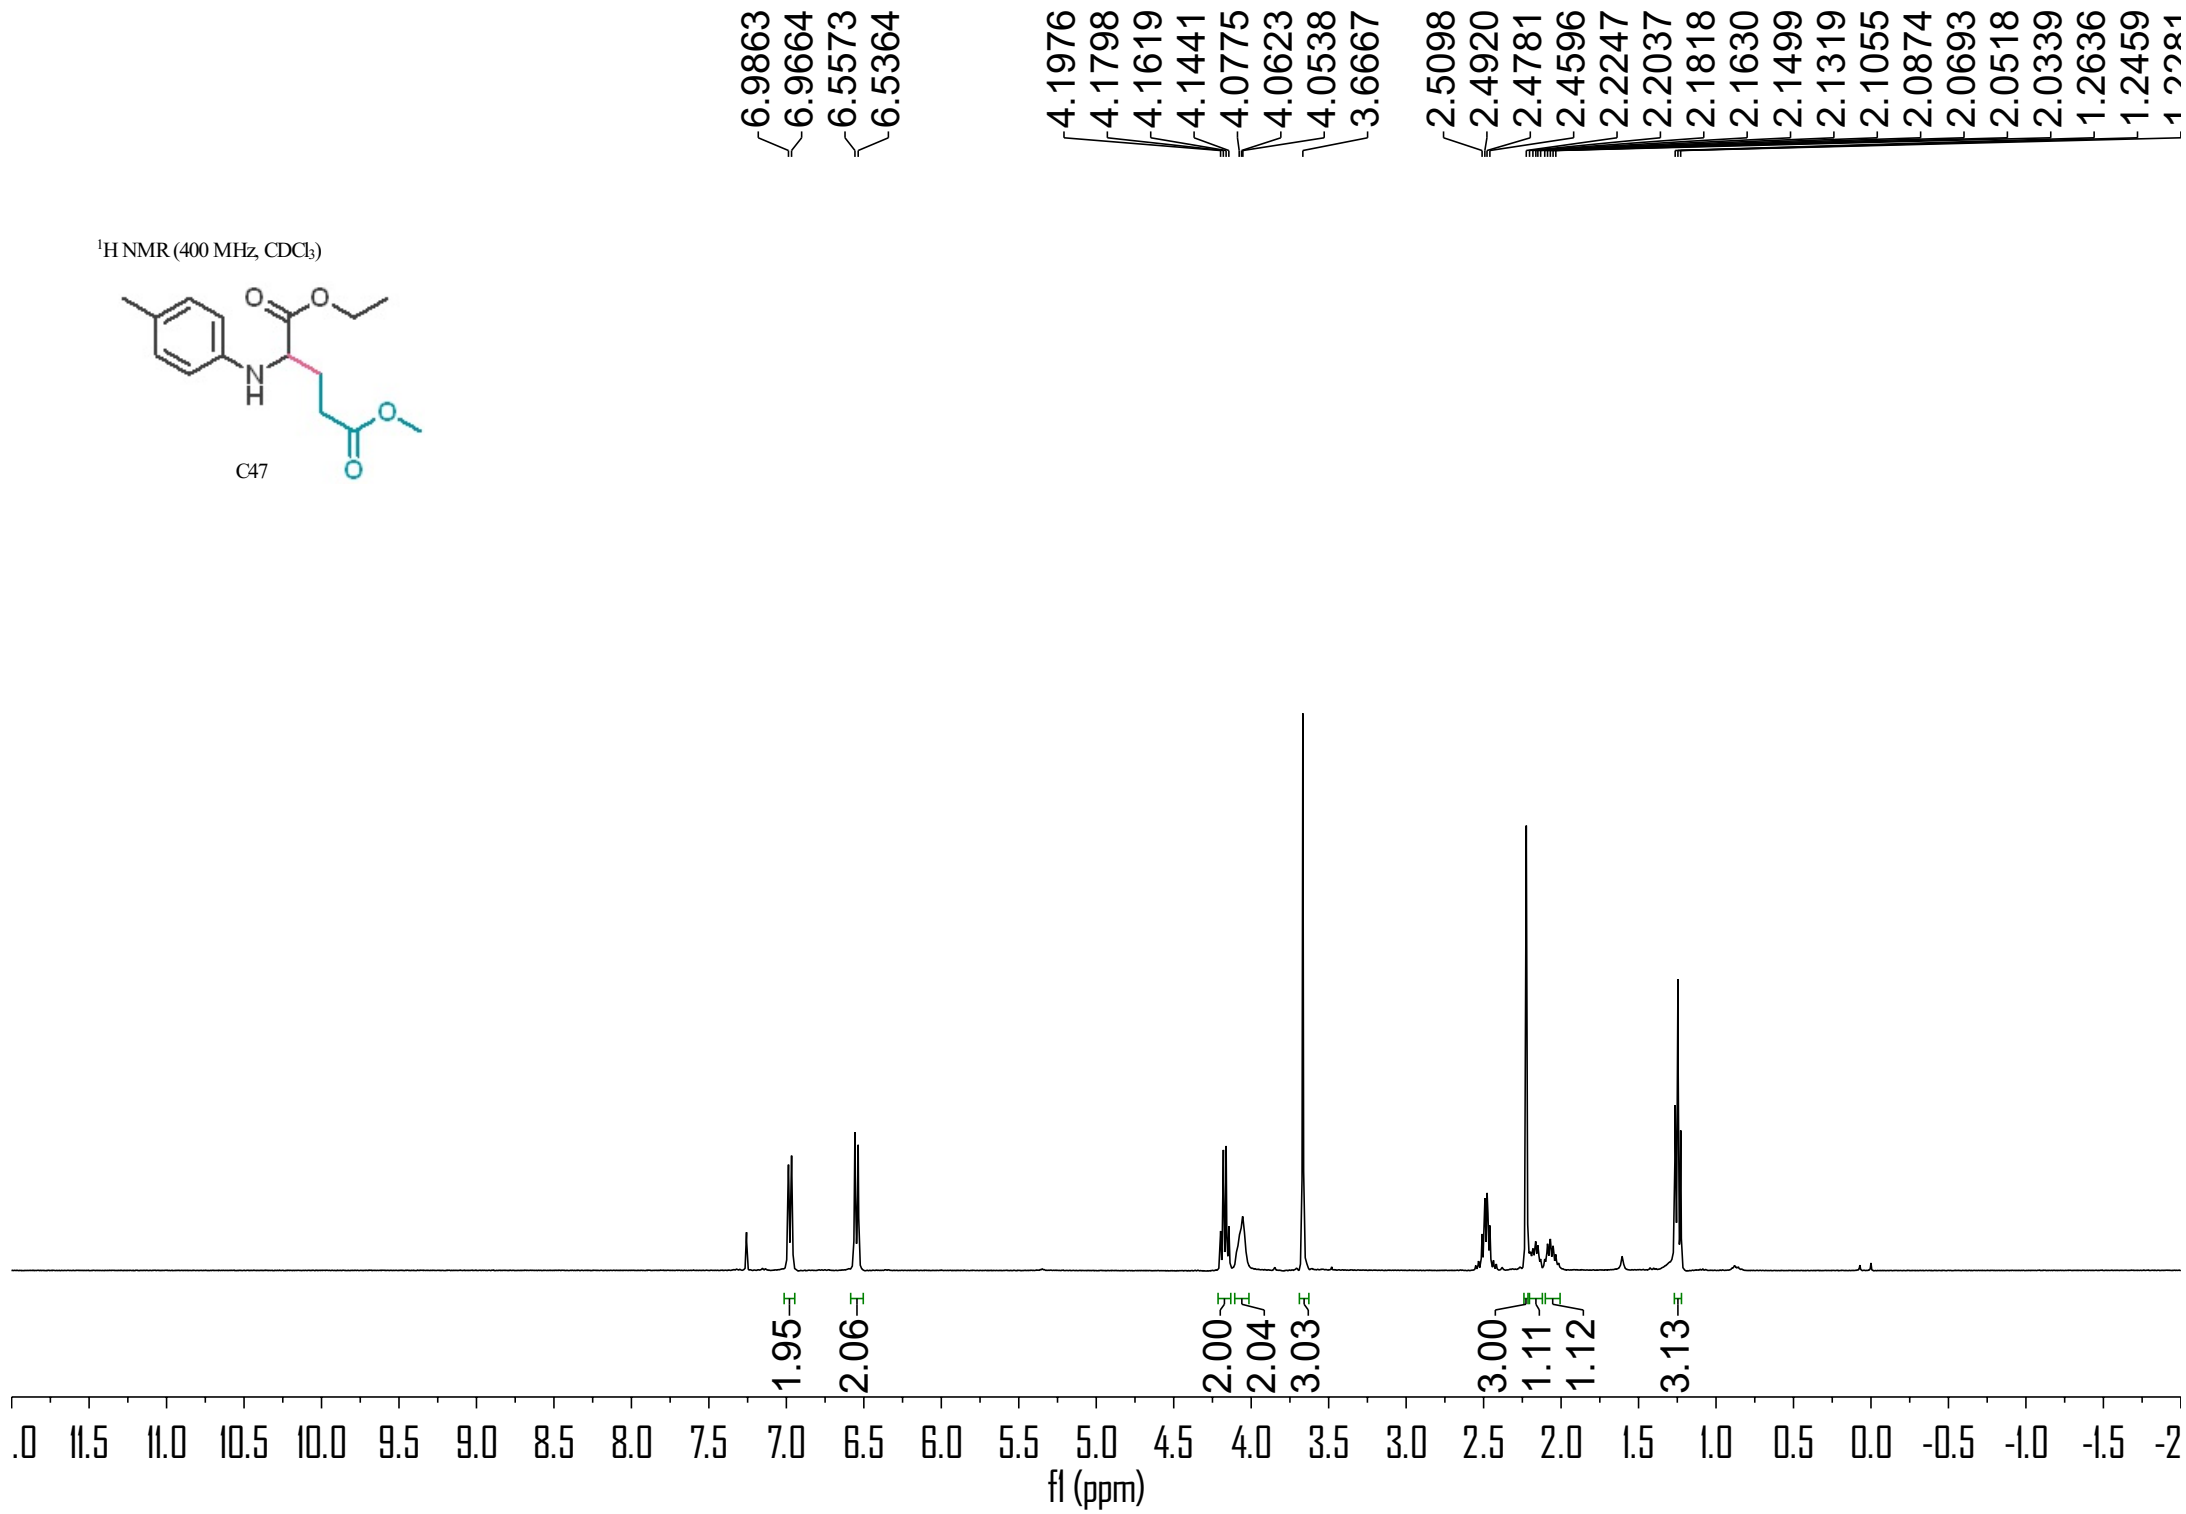

<sup>1</sup>H NMR (400 MHz, CDCl<sub>3</sub>)

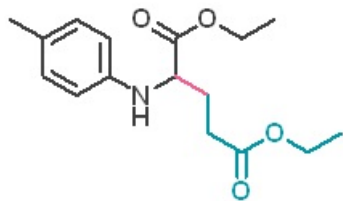

C48

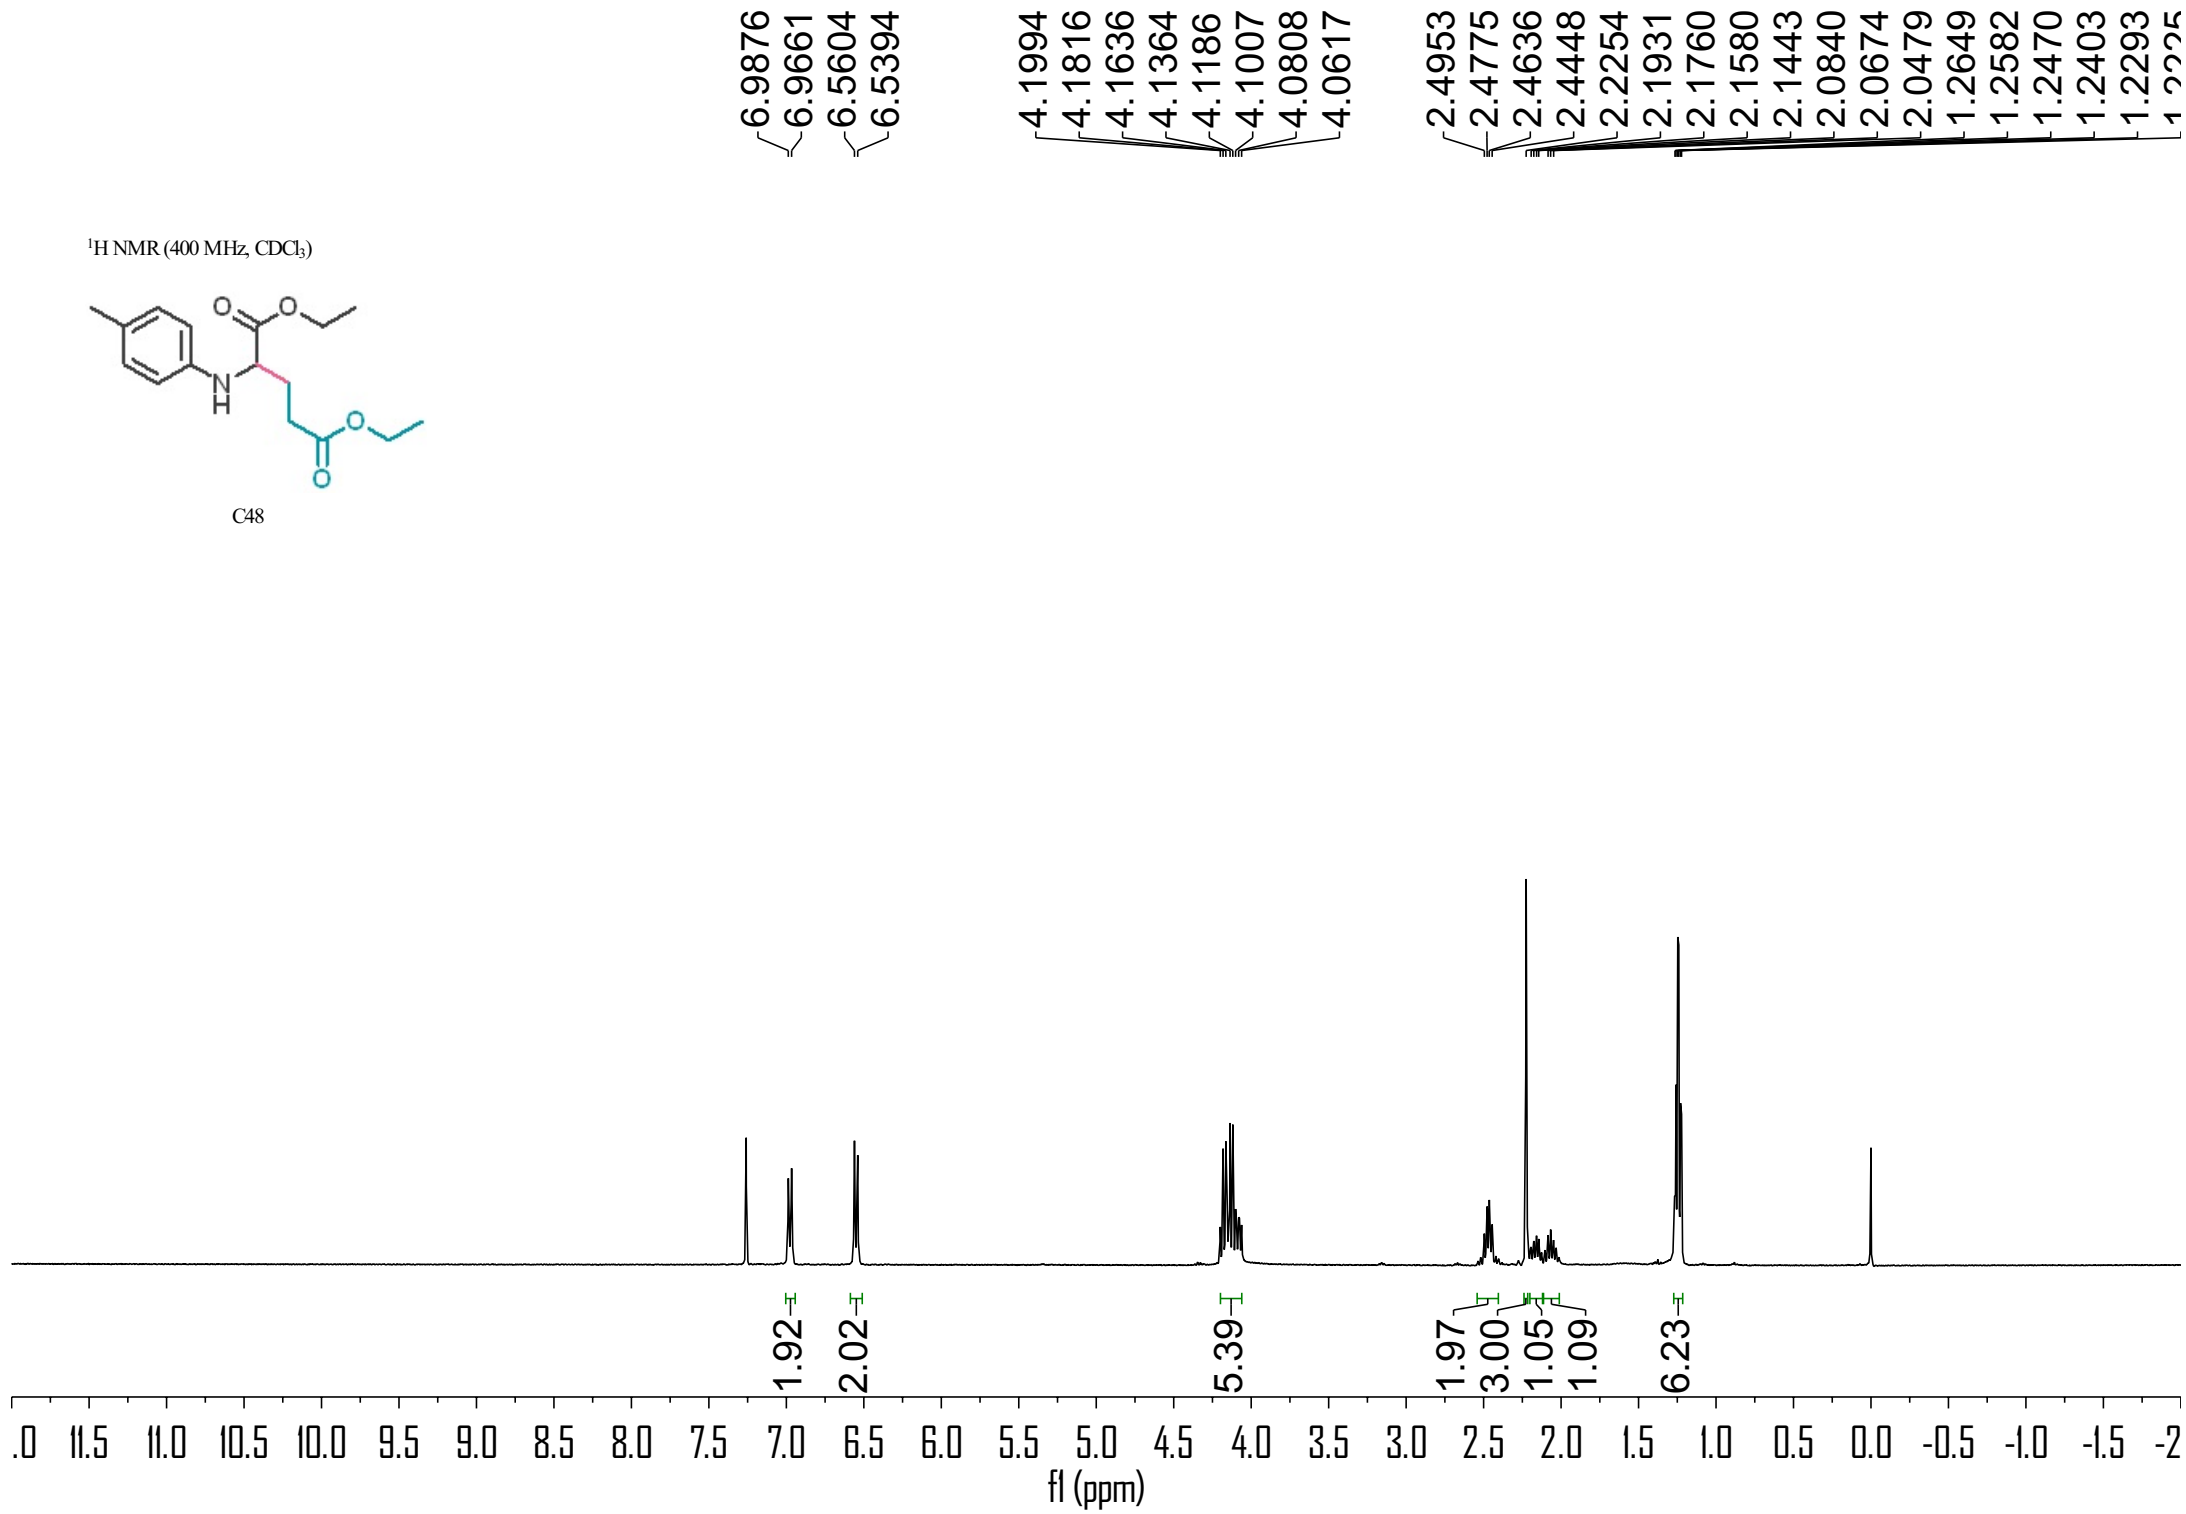

7.3583  
7.3447  
7.3357  
7.3271  
7.3252  
7.3171  
7.3137  
7.3104  
6.9684  
6.9542  
6.5293  
6.5154  
5.1085  
4.1835  
4.1772  
4.1727  
4.1653  
4.1608  
4.1534  
4.1490  
4.1414  
4.1370  
4.1309  
4.0886  
4.0794  
4.0767  
4.0664  
4.0307  
2.5820  
2.5541  
2.5425  
2.5230  
2.5101  
2.4823  
2.2221  
2.2068  
2.1952  
2.1837  
2.1748  
2.1619  
2.1044  
2.0913  
2.0804  
2.0676  
2.0567  
2.0437  
1.2429  
1.2311  
1.2192

<sup>1</sup>H NMR (600 MHz, CDCl<sub>3</sub>)

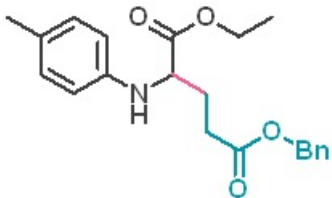

C49

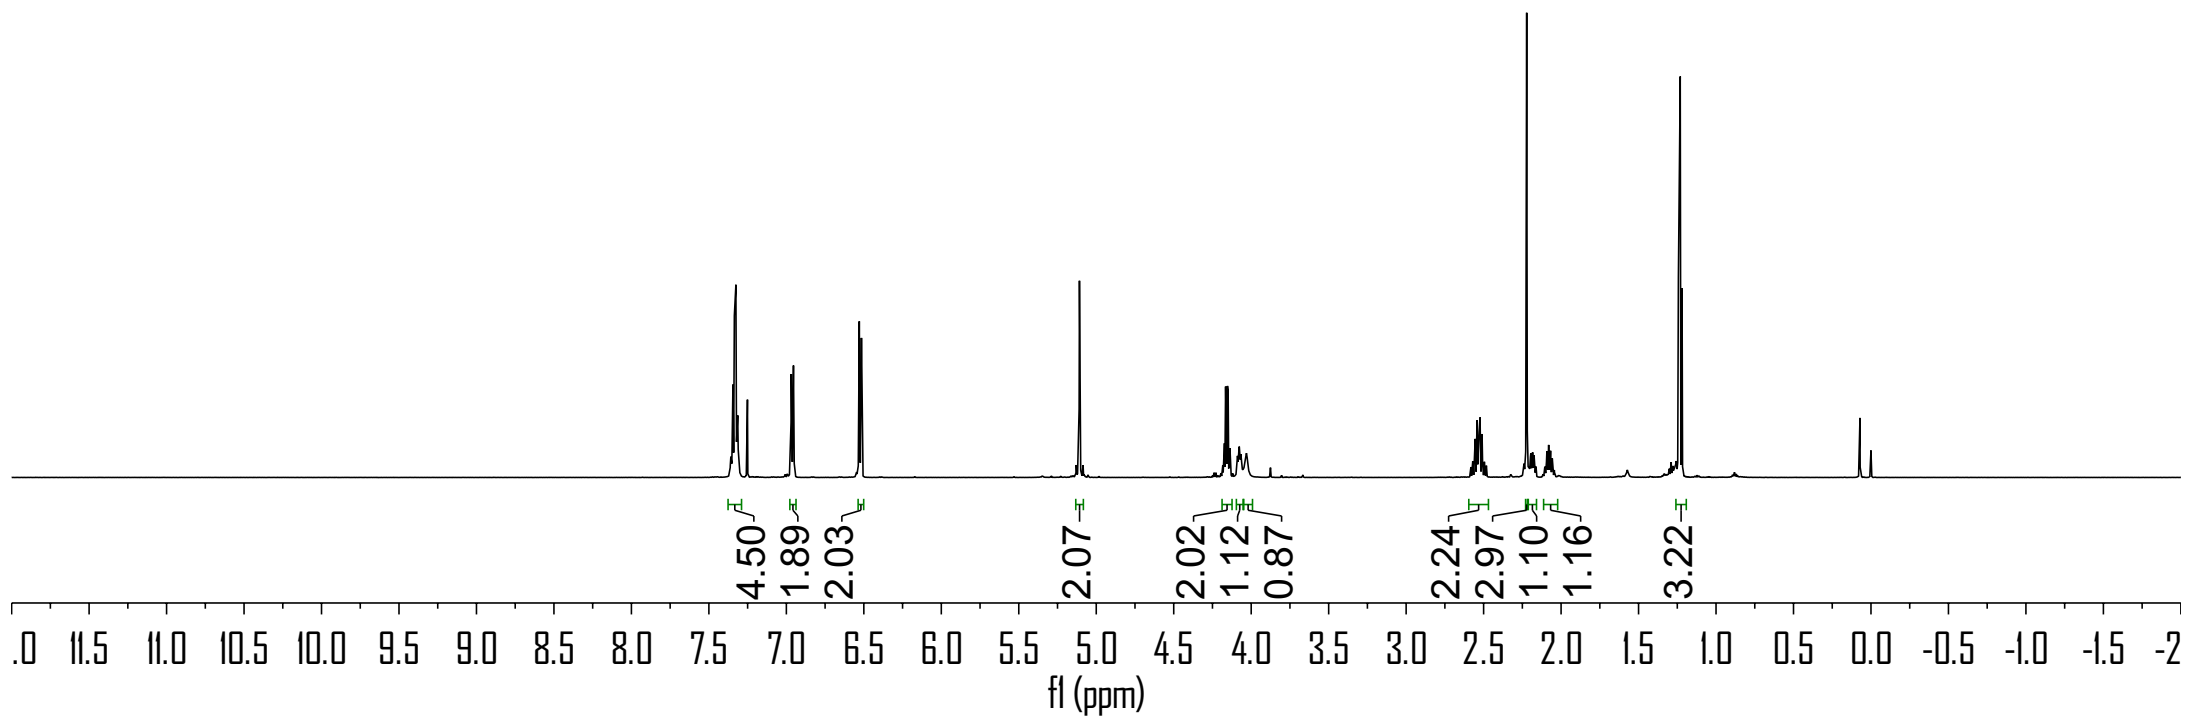

6.9956  
6.9914  
6.9817  
6.9774  
6.5814  
6.5781  
6.5673  
6.5640  
4.2066  
4.1948  
4.1832  
4.1714  
4.1596  
3.9851  
2.4550  
2.4293  
2.4117  
2.3870  
2.3754  
2.3568  
2.3340  
2.3130  
2.3041  
2.2967  
2.2924  
2.2864  
2.2753  
2.2702  
2.2654  
2.2508  
2.2331  
2.2296  
2.1339  
2.1286  
2.1231  
2.1117  
2.1064  
2.1011  
2.0961  
1.9298  
1.6451  
1.6283  
1.6155  
1.5891  
1.2711  
1.2616  
1.2592  
1.2498  
1.2474  
1.2378

<sup>1</sup>H NMR (600 MHz, CDCl<sub>3</sub>)

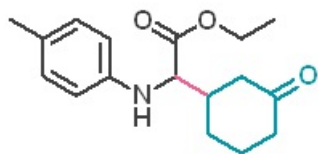

C50 (dr = 1.1:1)

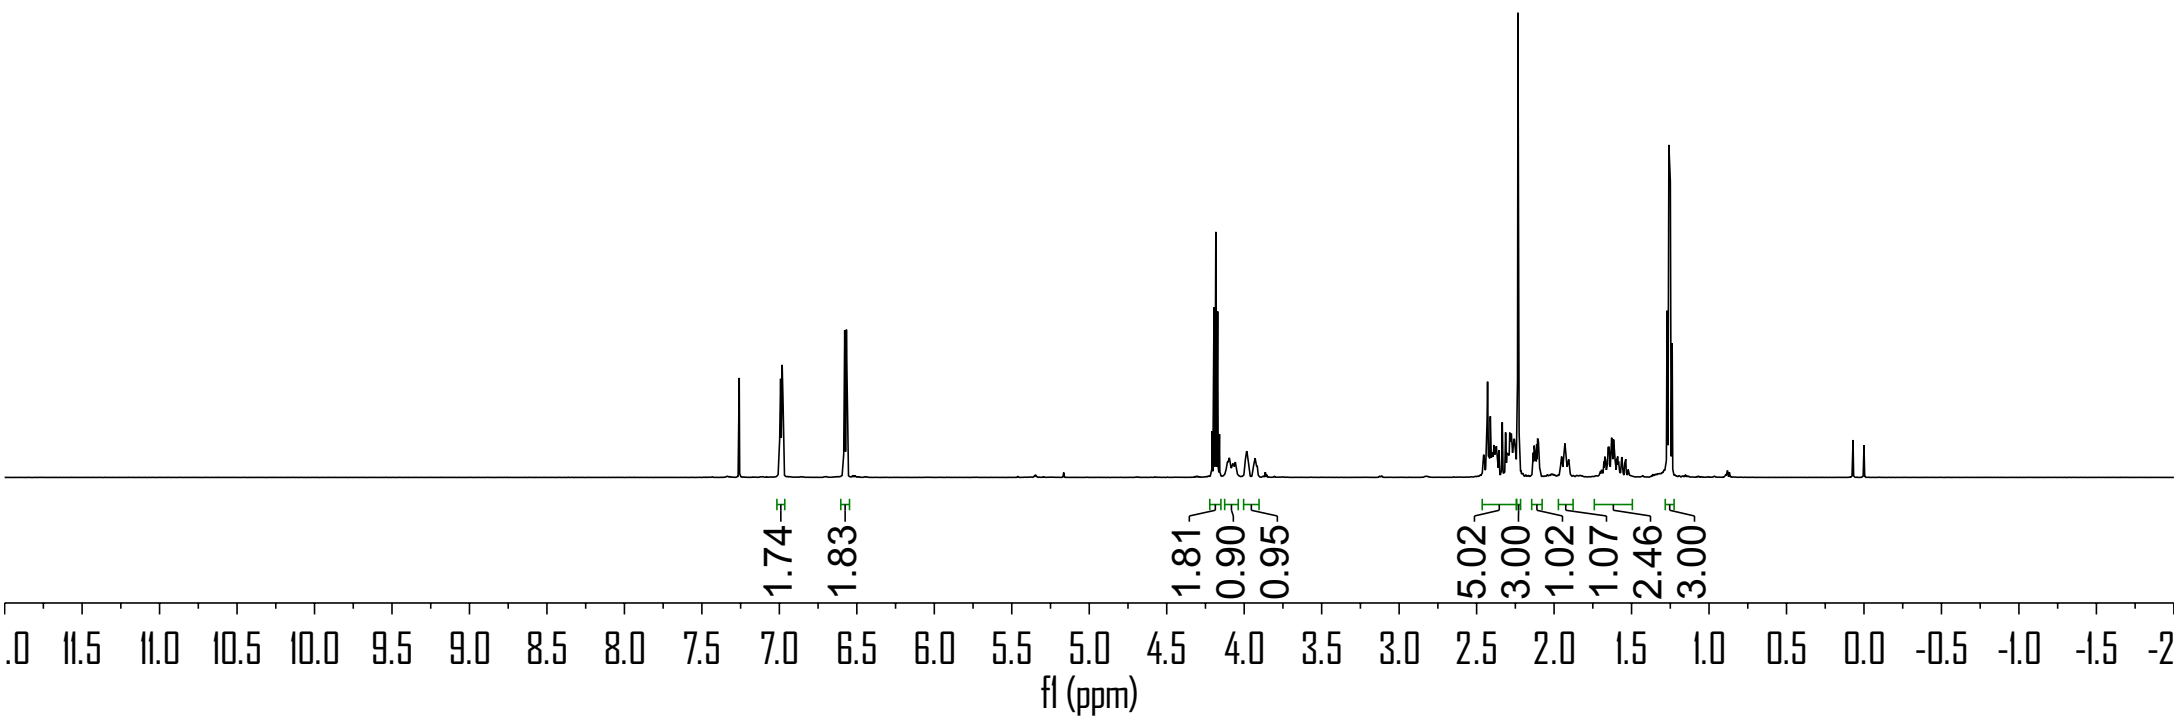

<sup>1</sup>H NMR (600 MHz, CDCl<sub>3</sub>)

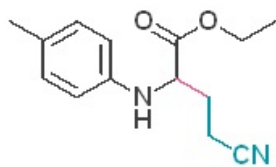

C51

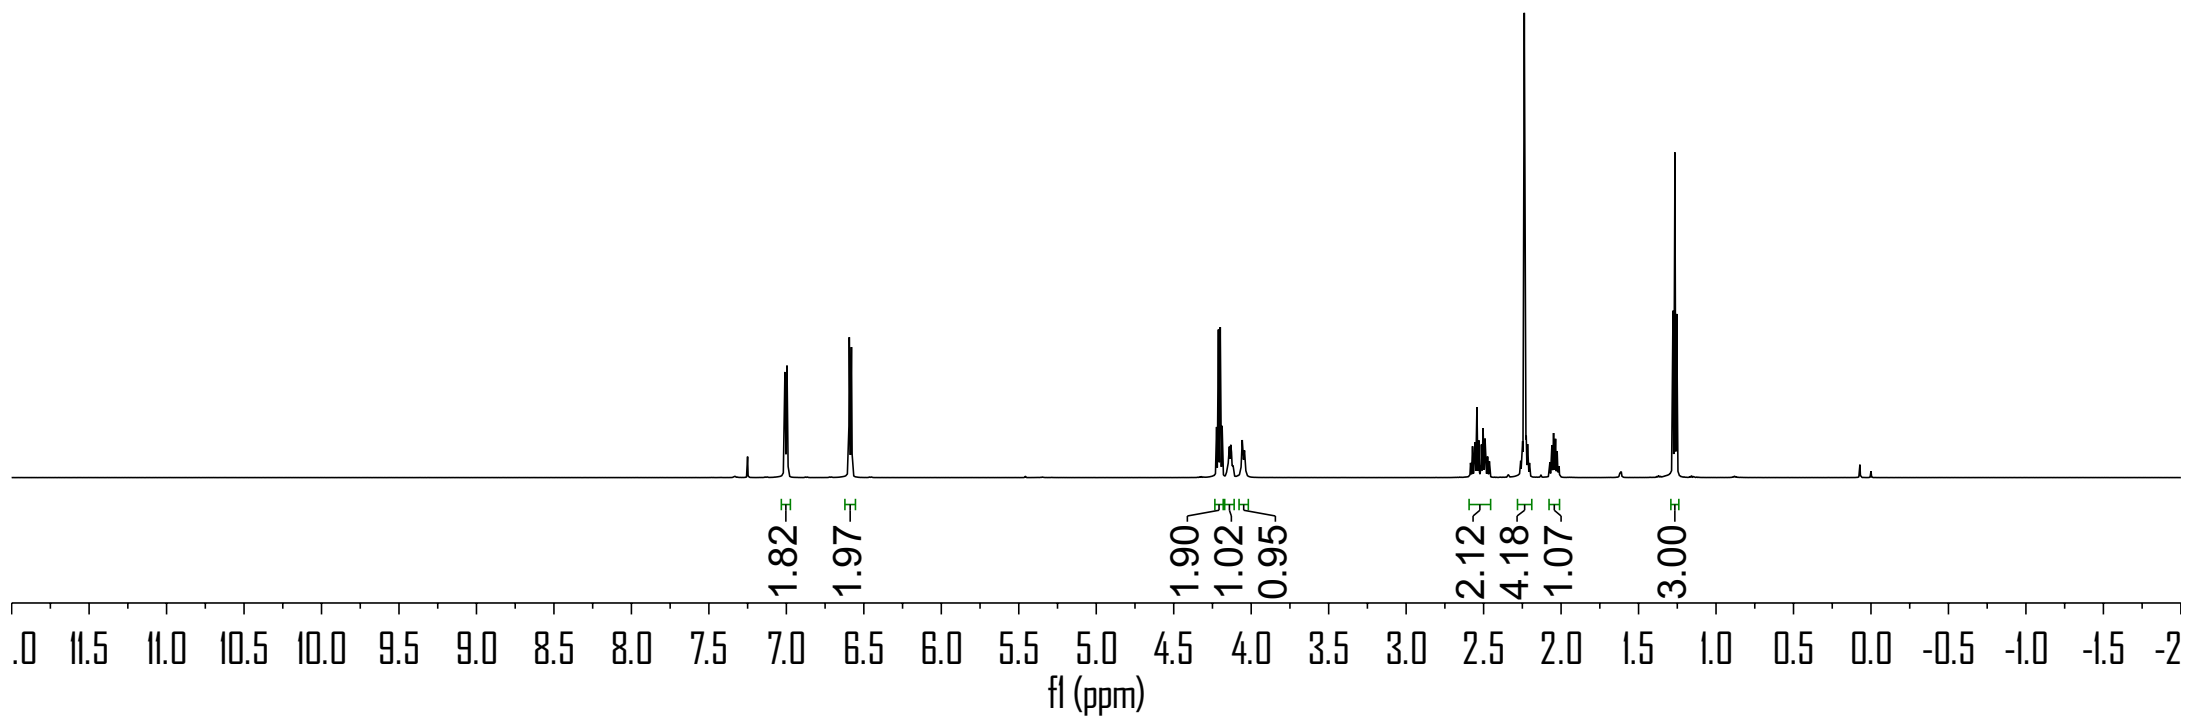

7.0092  
6.9960  
6.5939  
6.5799  
4.2235  
4.2116  
4.1996  
4.1878  
4.1551  
4.1410  
4.1322  
4.1190  
4.0577  
4.0429

2.5842  
2.5716  
2.5431  
2.5305  
2.5014  
2.4910  
2.4626  
2.2608  
2.2481  
2.2375  
2.2249  
2.2164  
2.0721  
2.0488  
2.0359  
1.2778  
1.2658  
1.2511

<sup>1</sup>H NMR (600 MHz, CDCl<sub>3</sub>)

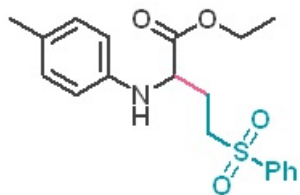

CS2

7.8985  
7.8850  
7.6610  
7.6491  
7.6359  
7.5649  
7.5519  
7.5390  
6.9598  
6.9465  
6.5039  
6.4899  
4.1647  
4.1527  
4.1408  
4.1290  
4.1069  
4.0936  
4.0842  
4.0703  
3.9702  
3.9553  
3.2704  
3.2562  
3.2435  
2.3393  
2.3308  
2.3245  
2.3159  
2.3041  
2.2915  
2.2886  
2.2147  
2.1285  
2.1146  
2.1045  
2.0908  
2.0798  
2.0662  
1.2267  
1.2147  
1.2029

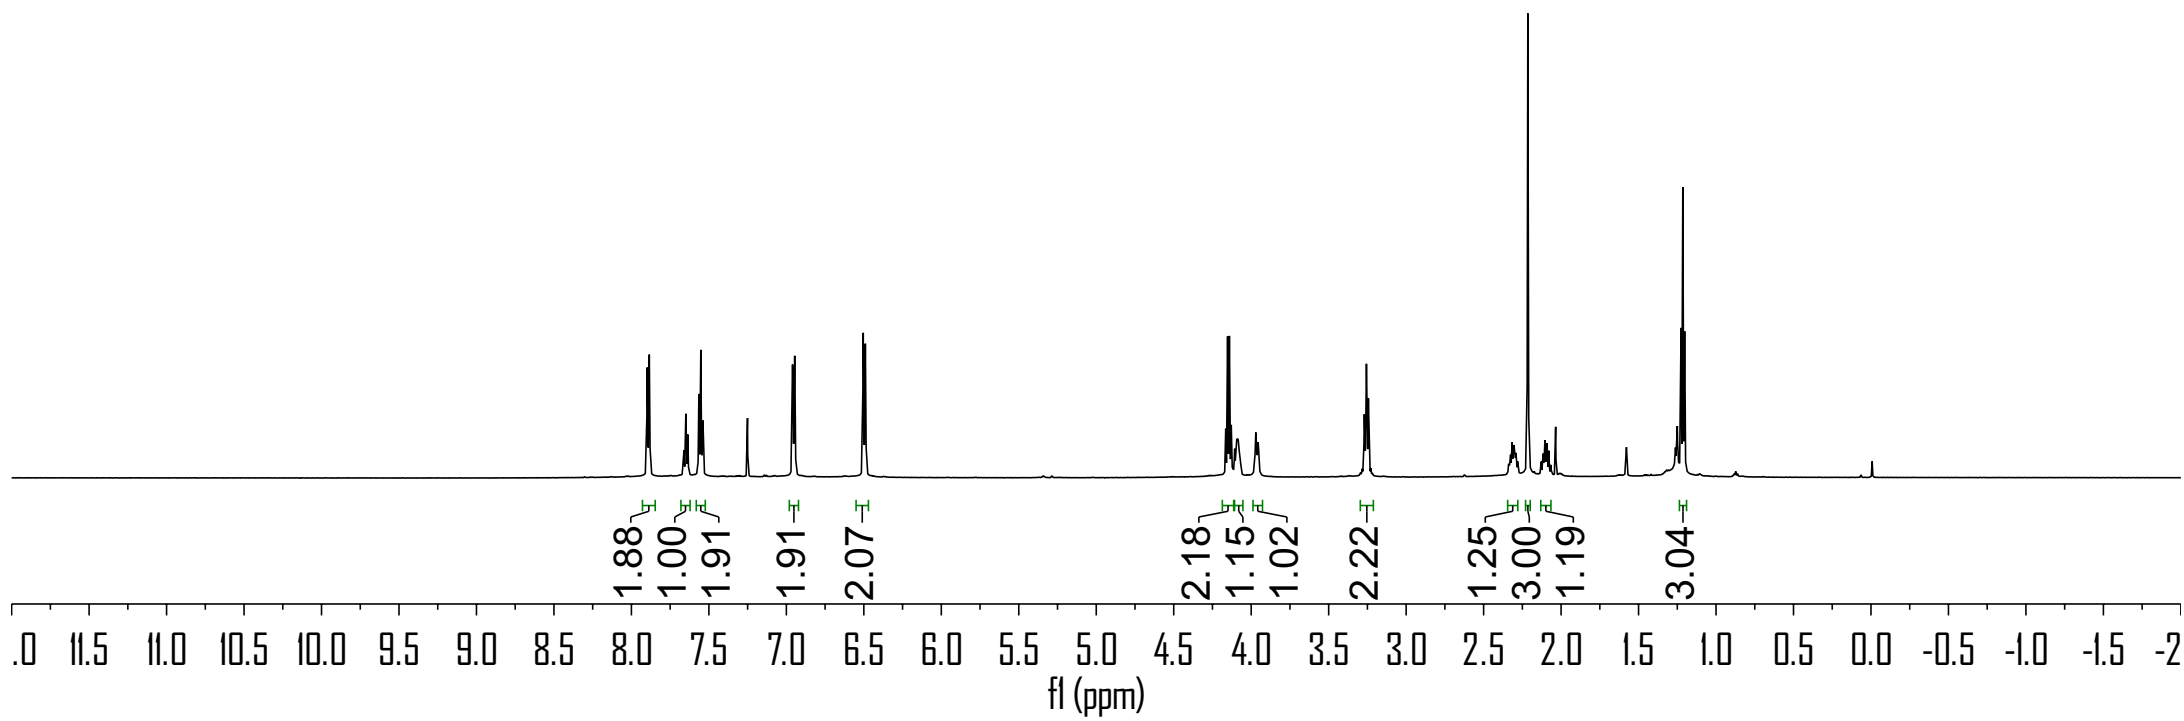

6.9621  
6.9489  
6.5412  
6.5273  
4.1035  
4.0915  
4.0797  
4.0677  
3.7141  
2.4324  
2.4237  
2.4163  
2.4061  
2.3958  
2.3899  
2.3789  
2.3541  
2.3524  
2.3445  
2.3430  
2.3377  
2.3361  
2.3287  
2.3268  
2.3214  
2.3198  
2.3168  
2.3133  
2.3118  
2.3083  
2.3046  
2.2993  
2.2956  
2.2901  
2.2886  
2.2796  
2.2636  
2.2524  
2.2462  
2.2389  
2.2359  
2.2247  
1.4979  
1.2334  
1.2216  
1.2096

<sup>1</sup>H NMR (600 MHz, CDCl<sub>3</sub>)

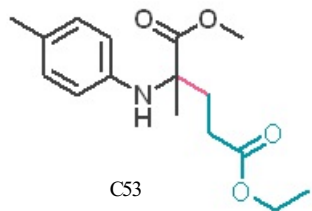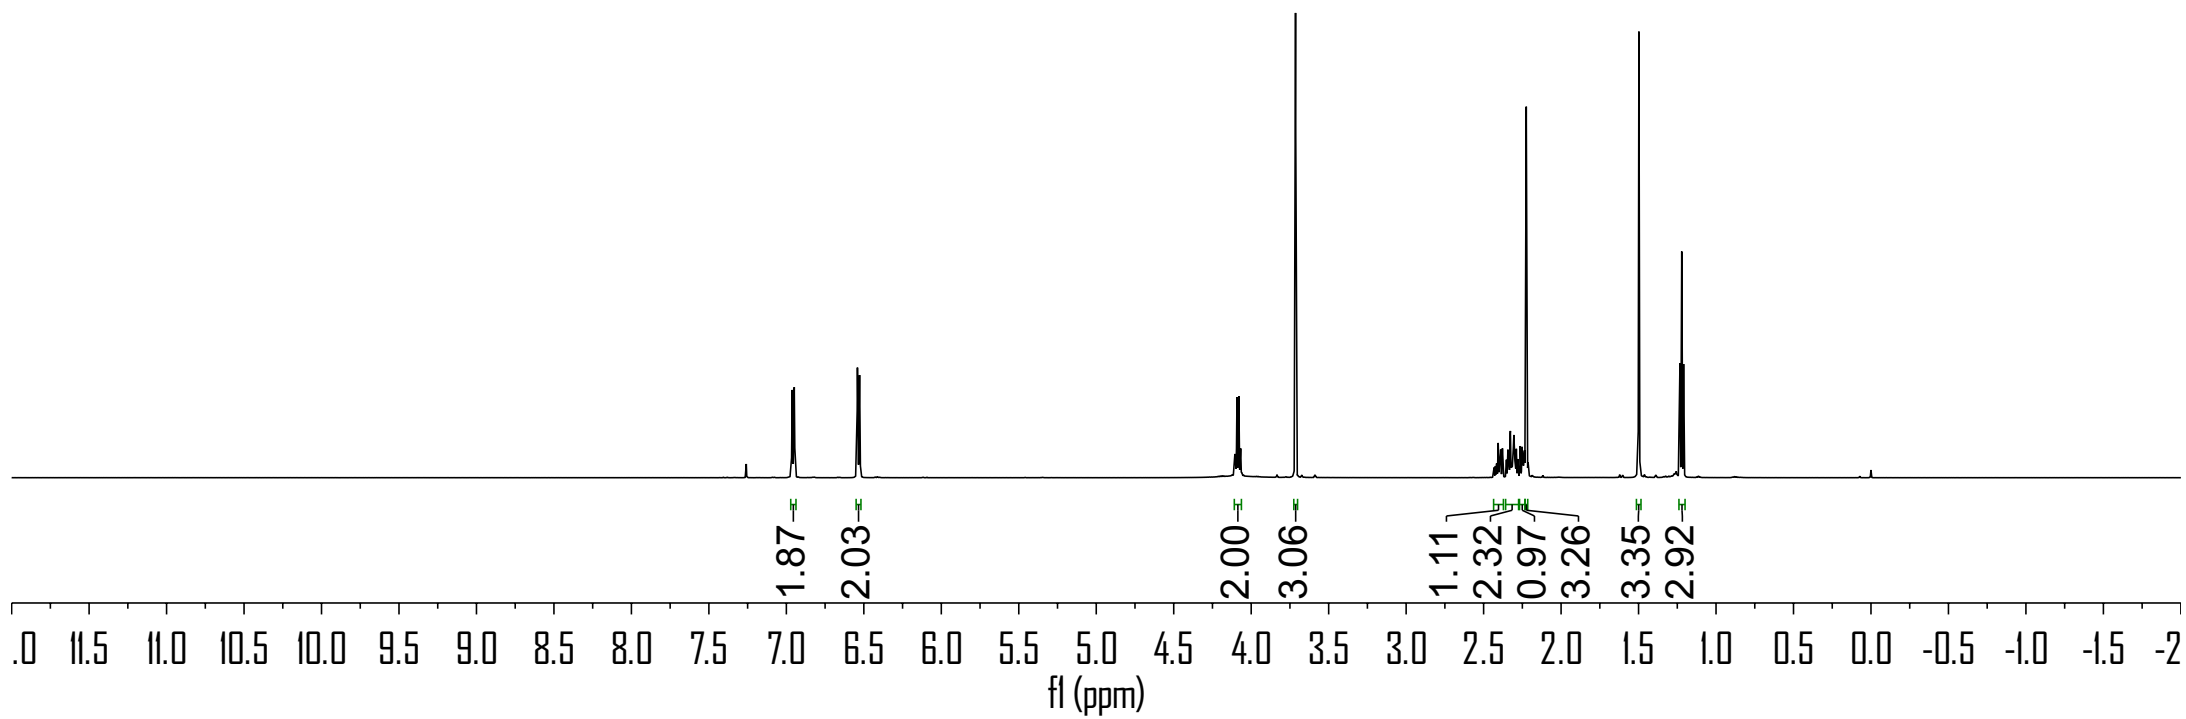

7.2096  
7.1975  
7.1954  
7.1864  
7.1831  
7.1795  
7.1774  
7.1749  
7.1723  
6.9458  
6.9412  
6.9392  
6.9369  
6.9340  
6.9298  
6.7642  
6.7520  
6.7397  
6.6883  
6.6864  
6.6737  
6.6720  
4.5642  
4.0653  
4.0534  
4.0415  
4.0296  
3.7143  
3.5016  
3.4788  
3.1766  
3.1536  
2.5453  
2.5404  
2.5375  
2.5226  
2.5150  
2.4162  
2.4083  
2.3927  
2.3899  
2.3773  
2.3750  
2.3696  
2.2282  
2.2206  
2.2024  
1.2070  
1.1950  
1.1831

<sup>1</sup>H NMR (600 MHz, CDCl<sub>3</sub>)

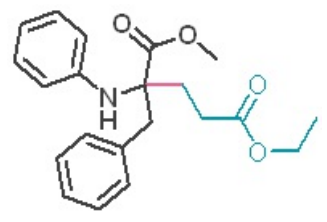

C54

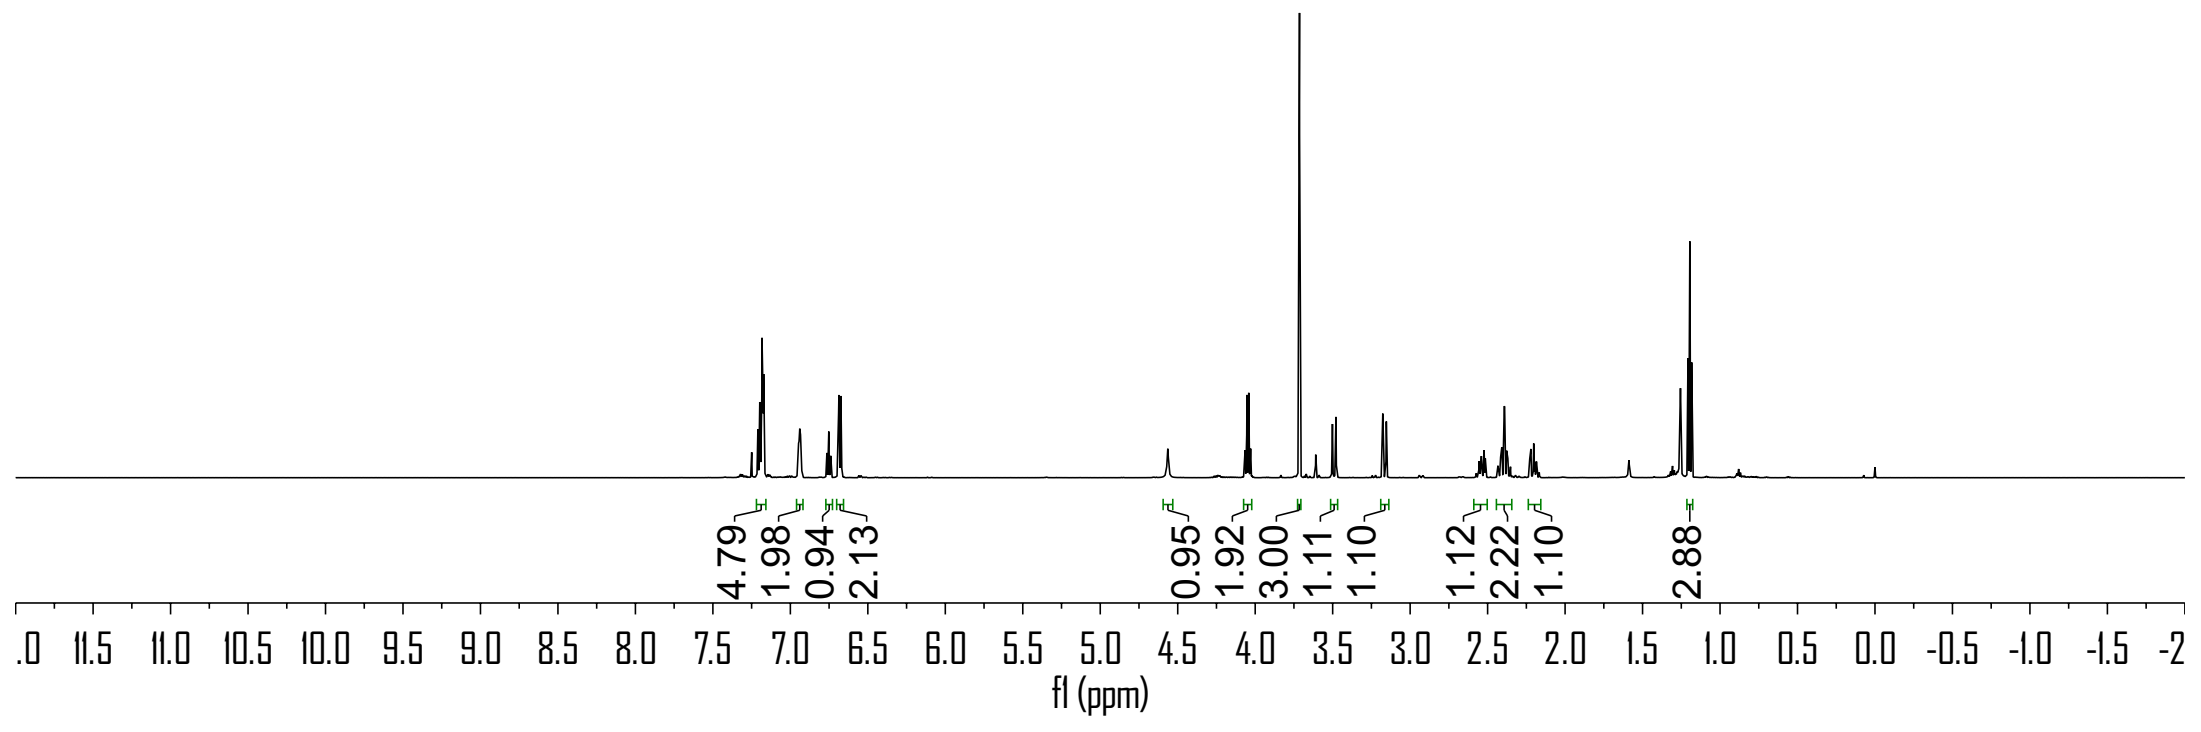



<sup>13</sup>C NMR (151 MHz, CDCl<sub>3</sub>)

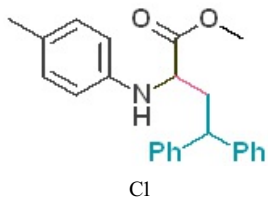

—174.72

144.55  
144.19  
143.35  
129.72  
128.63  
128.52  
128.06  
127.78  
126.53  
126.41  
—114.02

77.21  
77.00  
76.79

~55.55  
~52.00  
~47.21  
~39.12

—20.35

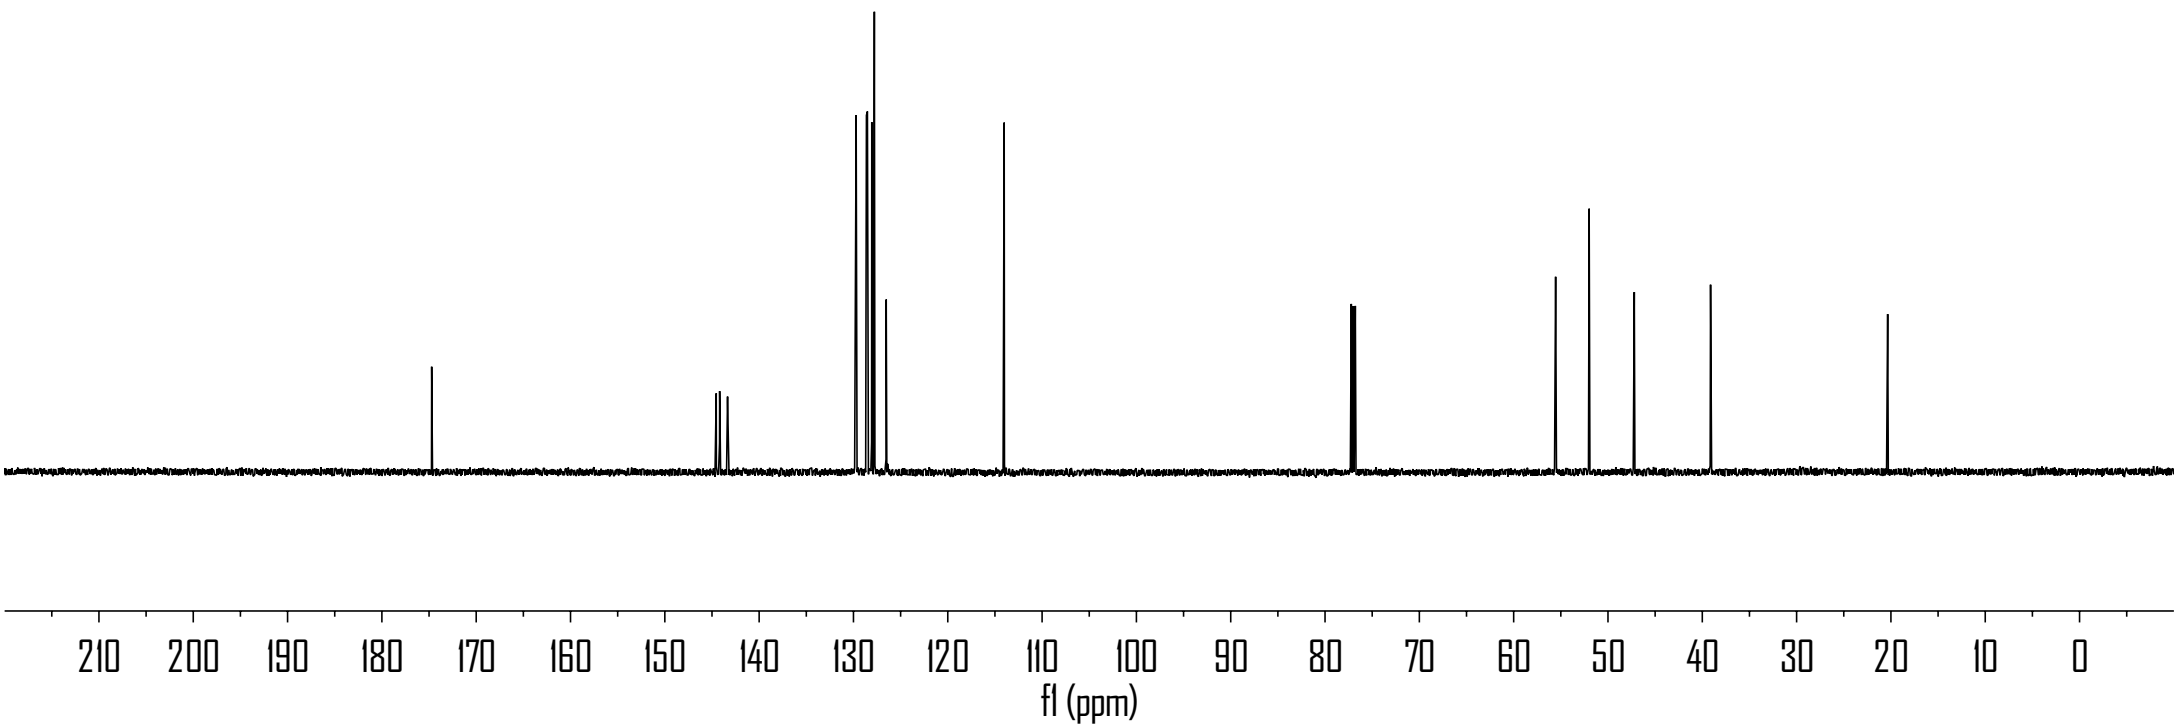

<sup>13</sup>C NMR (151 MHz, CDCl<sub>3</sub>)

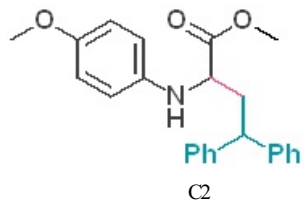

— 174.89

152.88  
144.24  
143.34  
140.93  
128.65  
128.53  
128.09  
127.77  
126.56  
126.41  
115.57  
114.75

77.21  
77.00  
76.79

56.48  
55.62  
52.00  
47.23  
~39.17

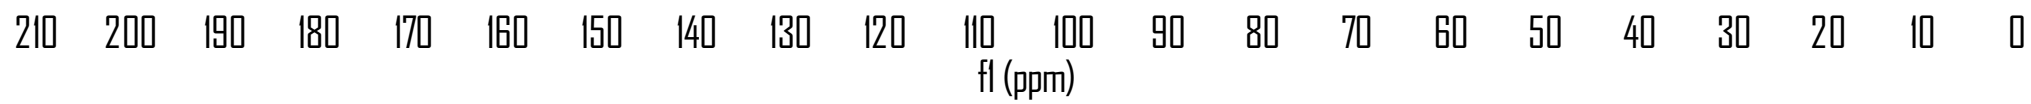

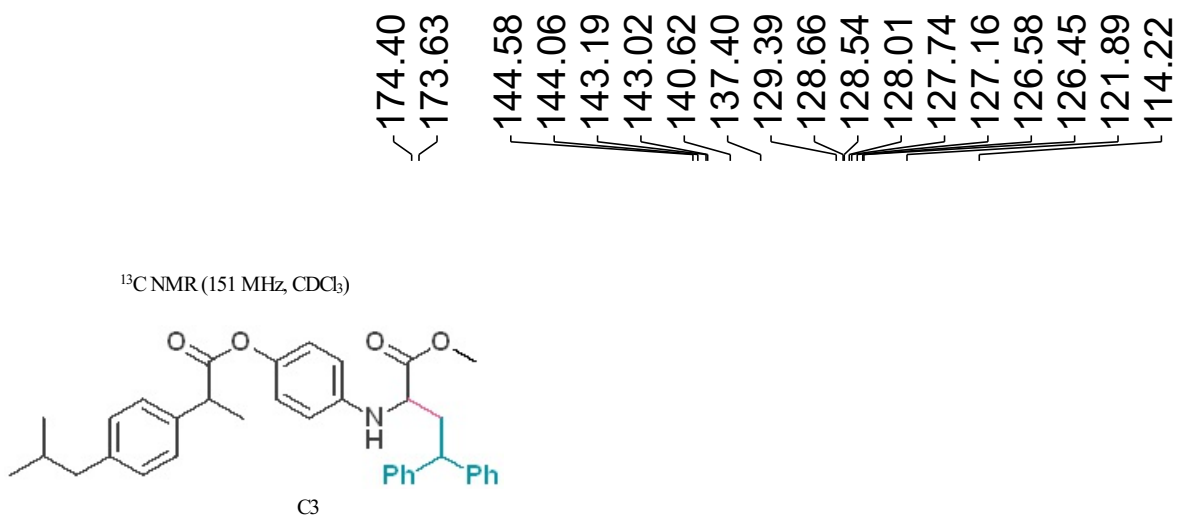

174.40  
173.63

144.58  
144.06  
143.19  
143.02  
140.62  
137.40  
129.39  
128.66  
128.54  
128.01  
127.74  
127.16  
126.58  
126.45  
121.89  
114.22

77.21  
77.00  
76.79

55.60  
52.08  
47.20  
45.15  
45.00  
39.02  
30.13  
22.35  
18.51

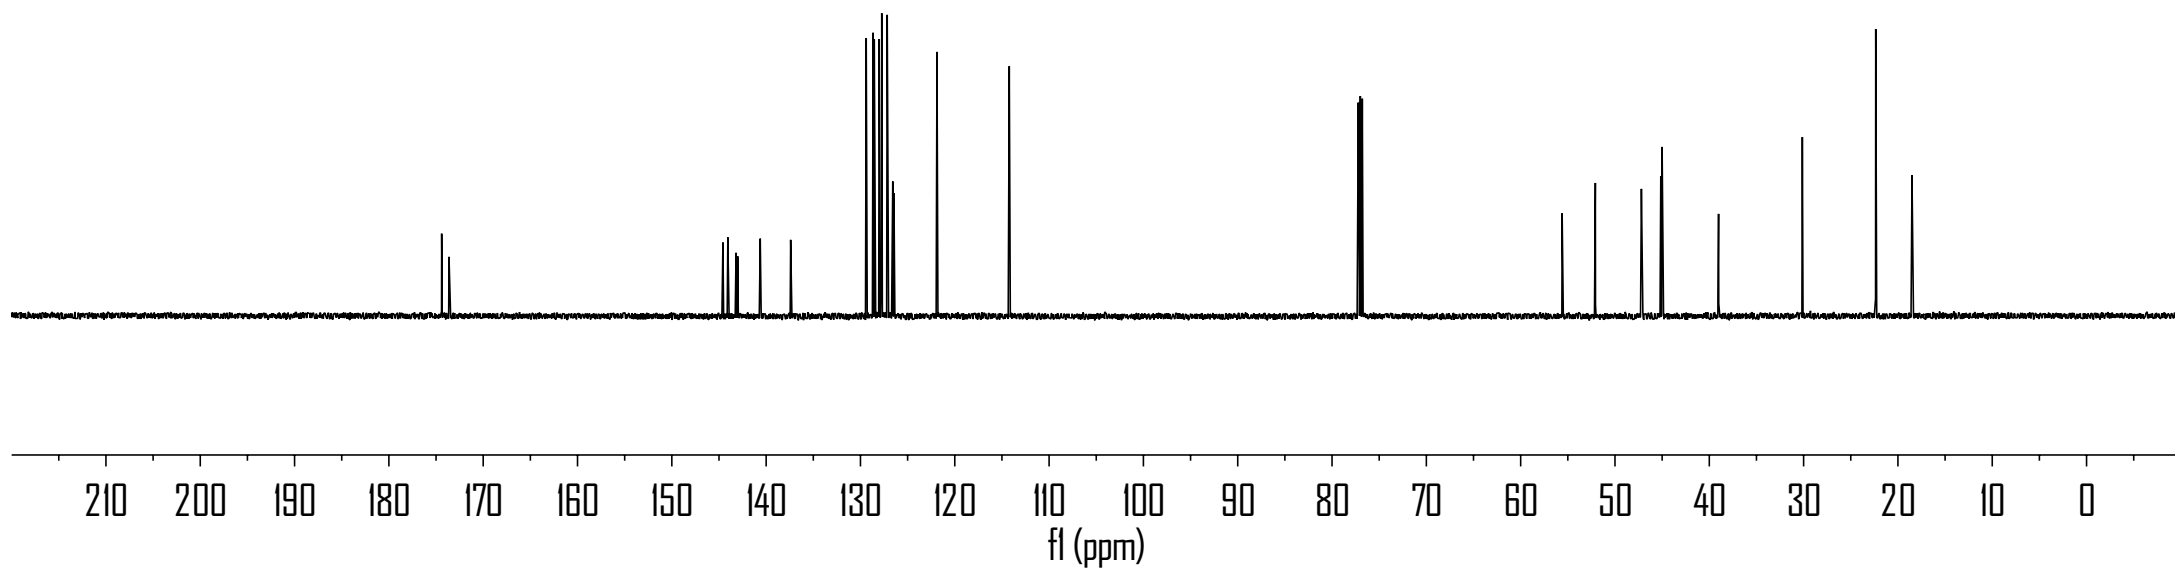

<sup>13</sup>C NMR (151 MHz, CDCl<sub>3</sub>)

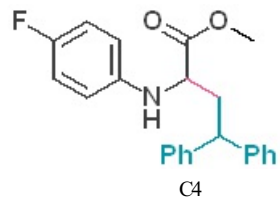

—174.54

157.18

155.61

144.08

143.20

143.17

143.15

128.69

128.56

128.03

127.75

126.62

126.48

115.74

115.59

115.02

114.97

77.21

77.00

76.79

56.06

52.09

47.23

39.03

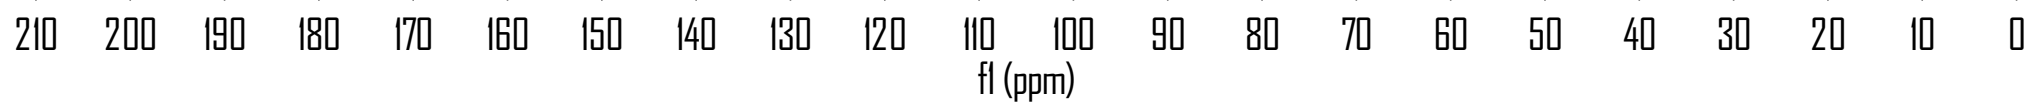

<sup>13</sup>C NMR (151 MHz, CDCl<sub>3</sub>)

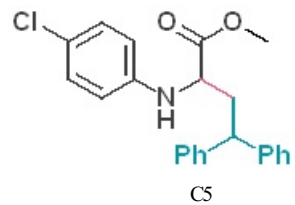

—174.23

145.40  
143.96  
143.14  
129.07  
128.70  
128.58  
127.99  
127.75  
126.65  
126.53  
123.14  
114.89

77.21  
77.00  
76.79

55.29  
52.17  
47.23  
38.91

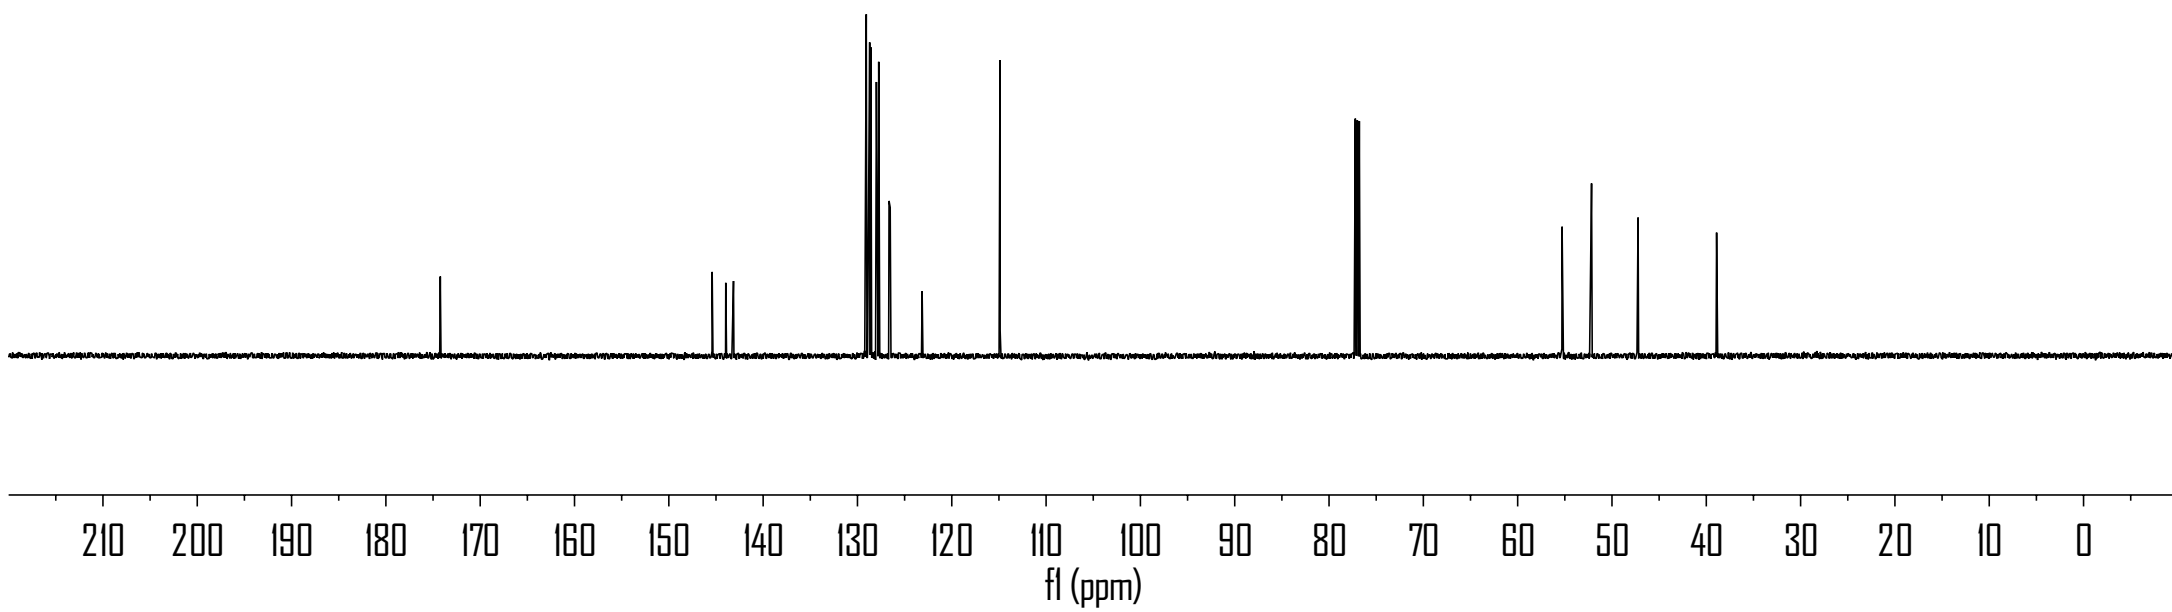

<sup>13</sup>C NMR (151 MHz, CDCl<sub>3</sub>)

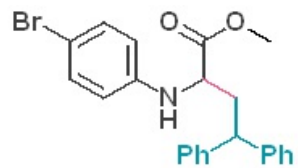

C6

—174.16

145.83

143.93

143.12

131.93

128.70

128.58

127.98

127.74

126.65

126.53

—115.32

—110.20

77.21

77.00

76.79

~55.13

~52.17

~47.22

~38.87



<sup>13</sup>C NMR (151 MHz, CDCl<sub>3</sub>)

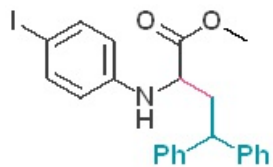

C7

—174.13

146.45

143.94

143.12

137.83

128.72

128.60

127.99

127.76

126.68

126.56

—115.91

79.47

77.21

77.00

76.79

~54.97

~52.22

~47.24

~38.88

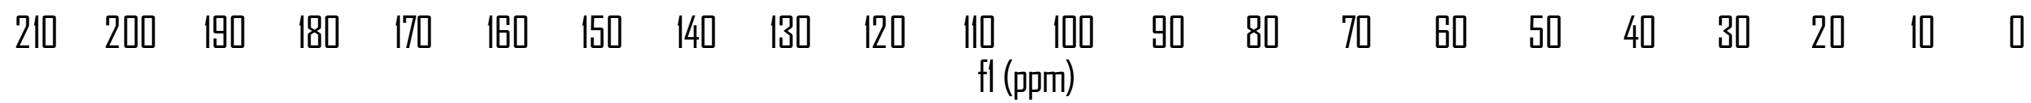

<sup>13</sup>C NMR (151 MHz, CDCl<sub>3</sub>)

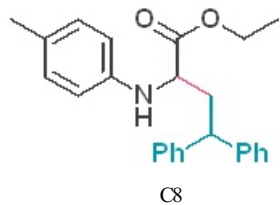

174.24  
144.60  
144.22  
143.44  
129.69  
128.63  
128.53  
128.07  
127.84  
127.74  
126.51  
126.43  
114.08

77.21  
77.00  
76.79

61.00  
55.67  
47.26  
39.18

20.36  
14.19

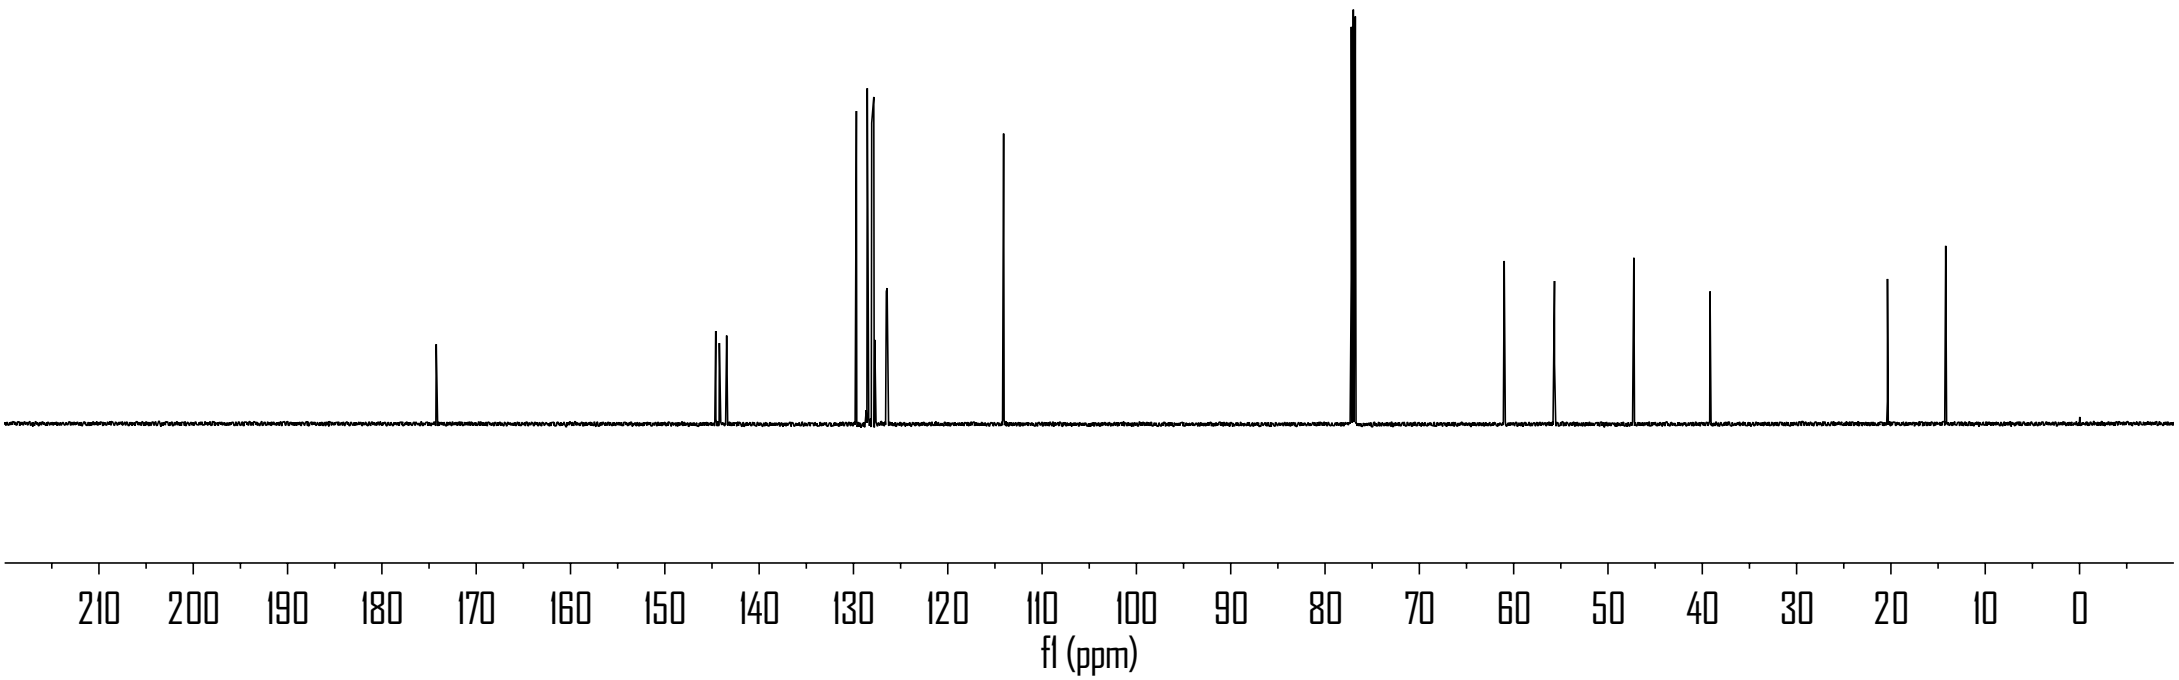



<sup>13</sup>C NMR (151 MHz, CDCl<sub>3</sub>)

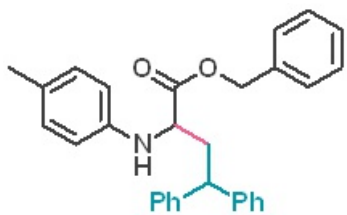

9

174.05  
144.48  
144.00  
143.39  
135.53  
129.70  
128.59  
128.50  
128.49  
128.24  
128.16  
127.98  
127.82  
127.79  
126.49  
126.40  
114.12

77.21  
77.00  
76.79  
66.65

55.73  
47.18  
39.06

20.36

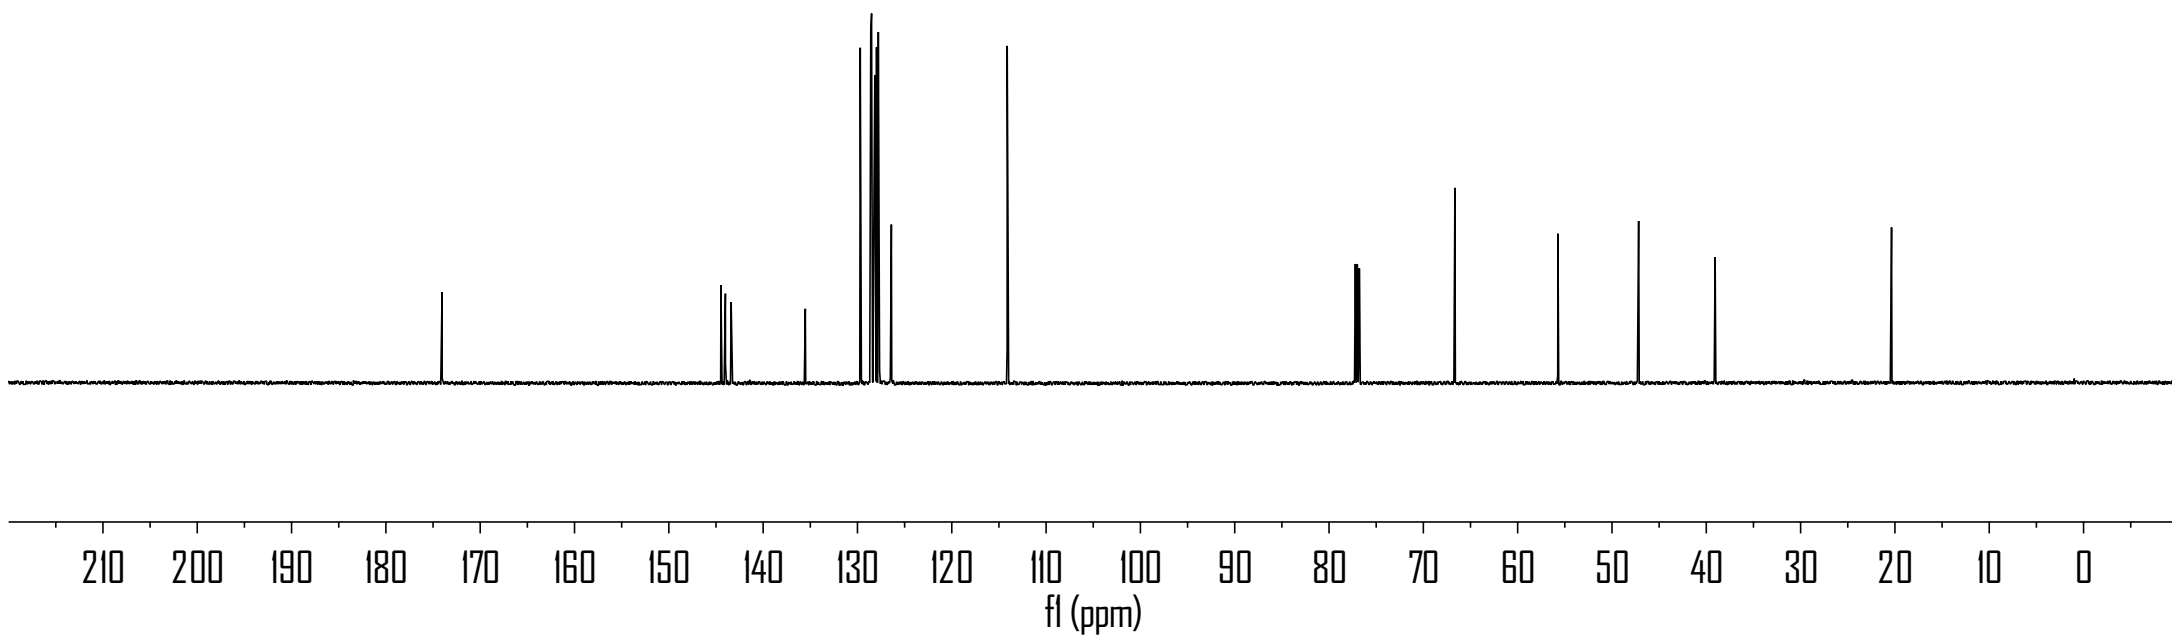

<sup>13</sup>C NMR (151 MHz, CDCl<sub>3</sub>)

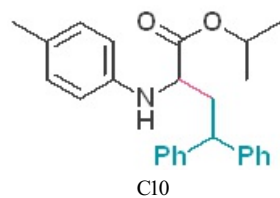

173.77  
144.63  
144.21  
143.48  
129.63  
128.61  
128.54  
128.04  
127.85  
127.66  
126.48  
126.42  
114.11

77.21  
77.00  
76.79  
68.60

55.77  
47.27  
39.21

21.77  
21.74  
20.35

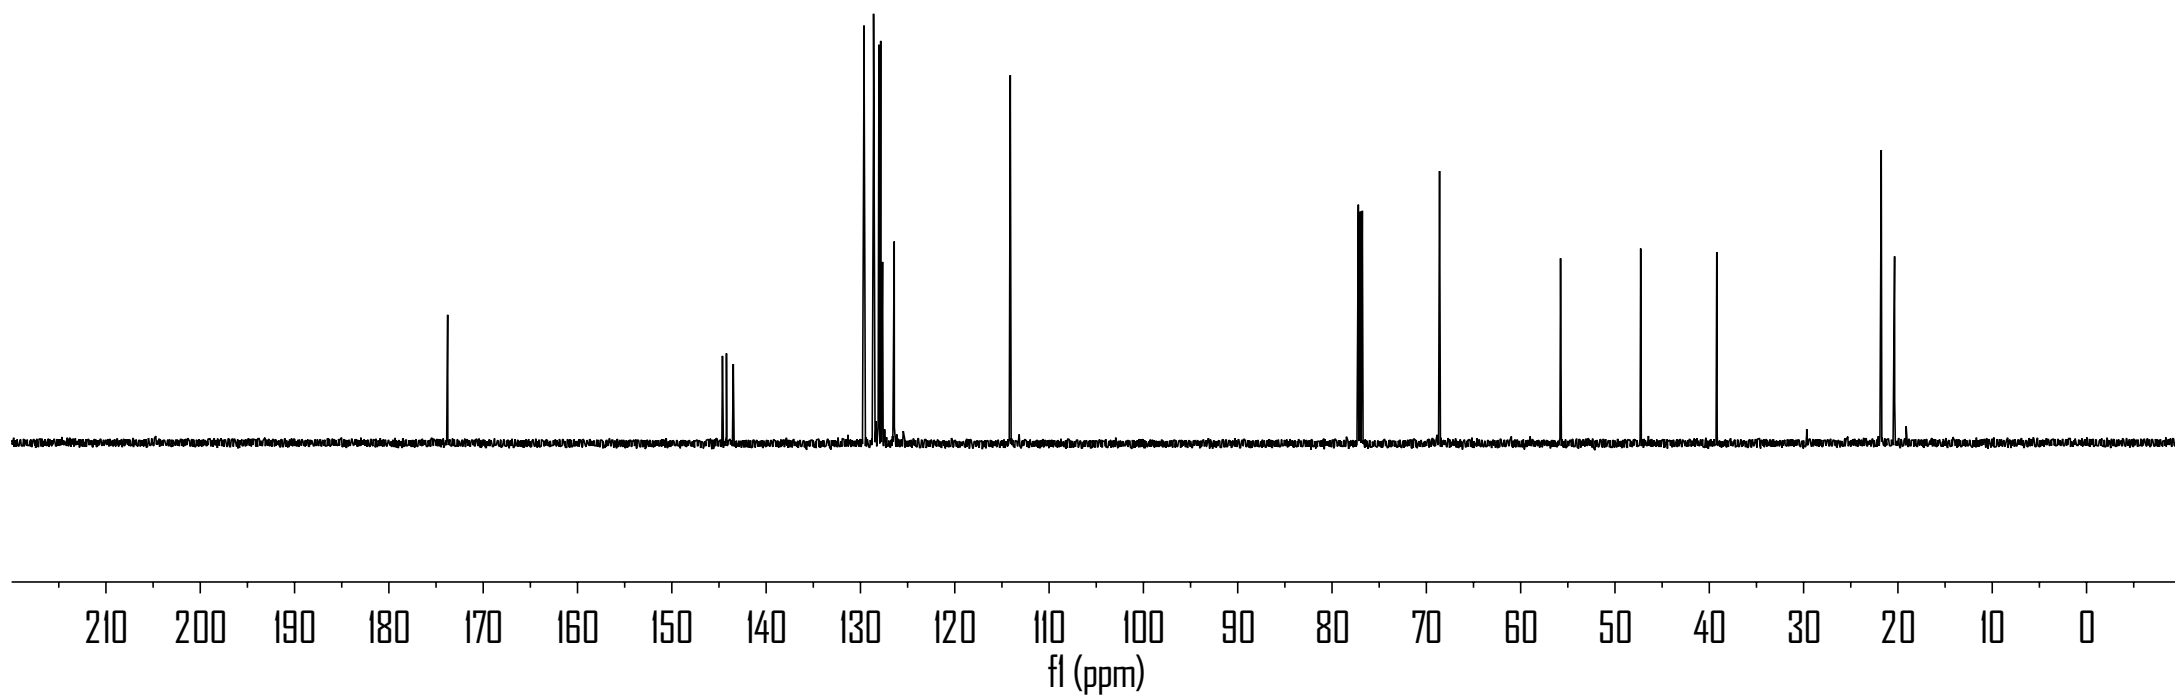

173.78  
 173.77  
 144.63  
 144.61  
 143.49  
 143.47  
 129.63  
 128.61  
 128.54  
 128.06  
 128.04  
 127.87  
 127.73  
 127.69  
 127.67  
 126.48  
 126.43  
 114.13  
 114.12  
 77.21  
 77.00  
 76.79  
 74.33  
 55.81  
 54.23  
 51.32  
 47.73  
 47.26  
 44.60  
 44.58  
 39.26  
 36.60  
 36.58  
 35.81  
 35.60  
 34.99  
 33.82  
 33.78  
 31.48  
 30.76  
 30.74  
 28.23  
 28.17  
 27.36  
 27.34  
 21.74  
 20.43  
 20.36  
 13.78  
 12.21

<sup>13</sup>C NMR (151 MHz, CDCl<sub>3</sub>)

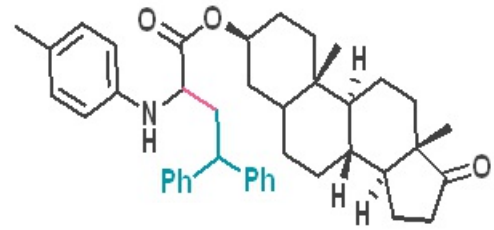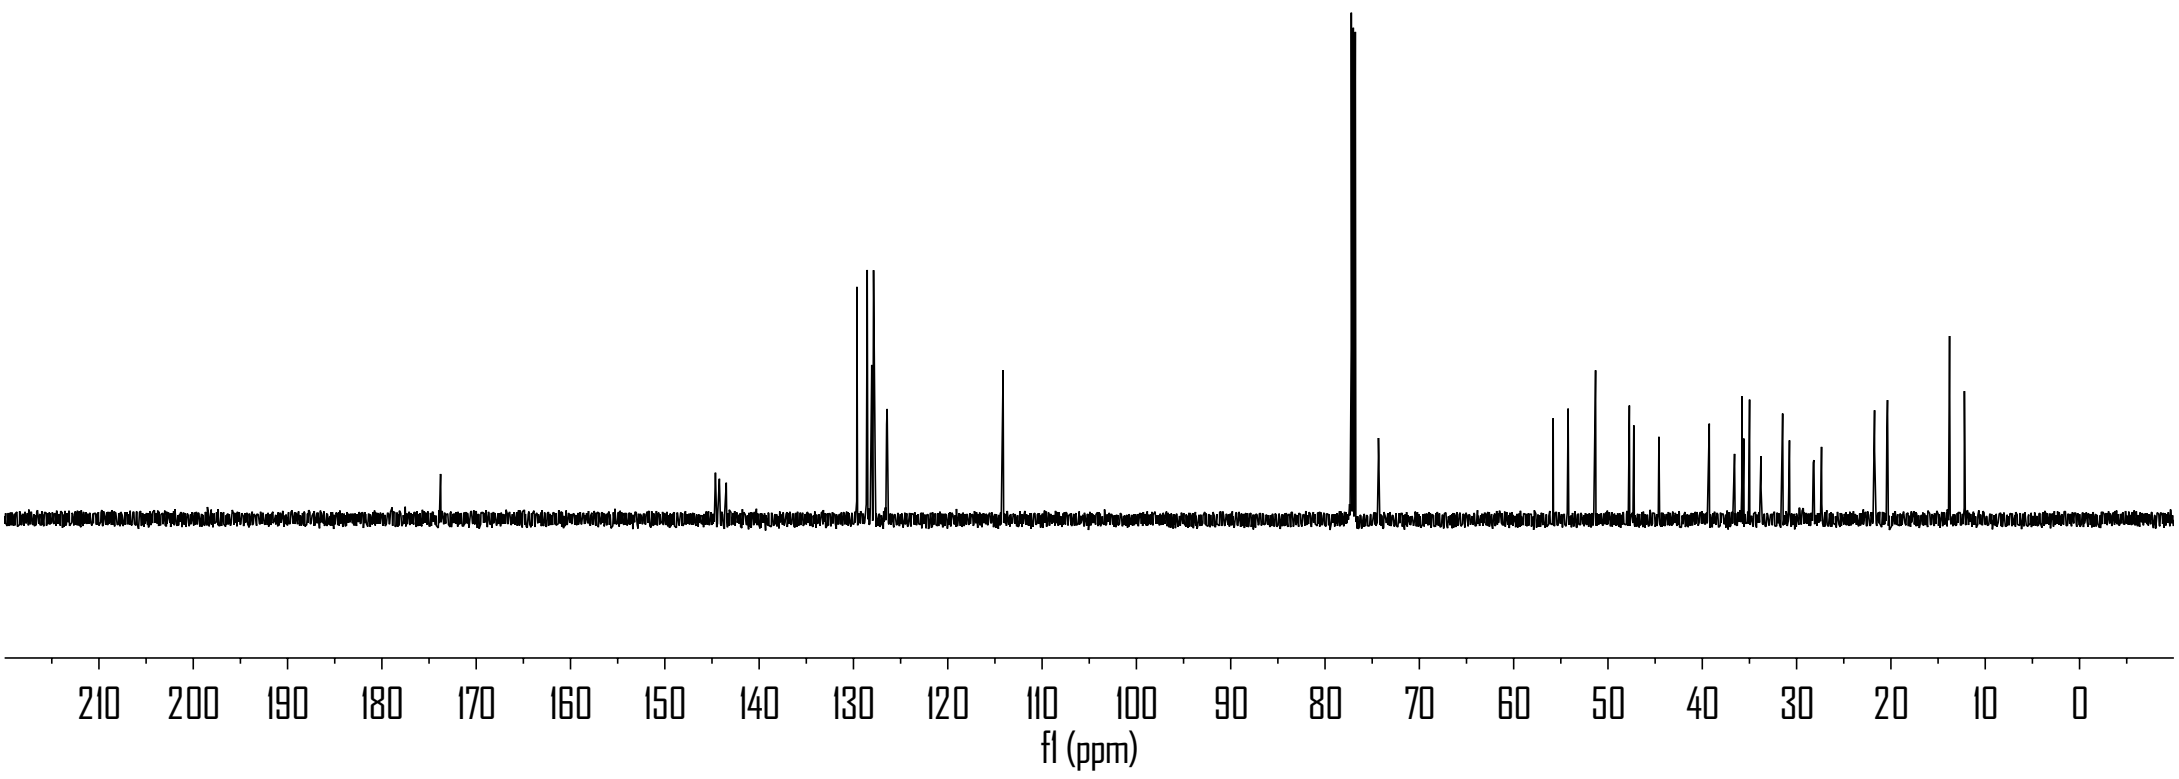

<sup>13</sup>C NMR (151 MHz, CDCl<sub>3</sub>)

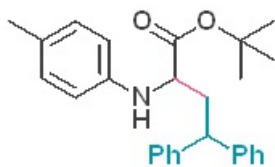

C12

—173.50  
144.76  
144.31  
143.56  
129.59  
128.61  
128.54  
128.05  
127.88  
127.49  
126.46  
126.41  
—114.07

81.51  
77.21  
77.00  
76.79

56.19  
47.41  
39.43

—28.02  
—20.36

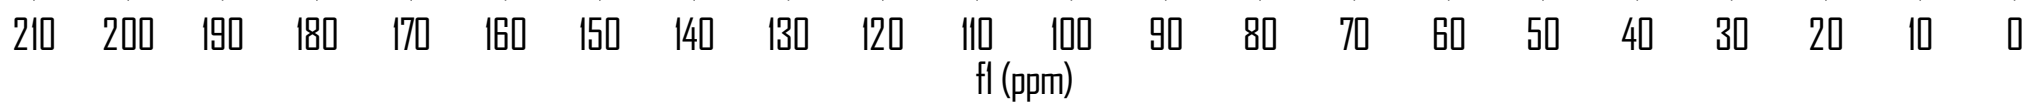

<sup>13</sup>C NMR (151 MHz, CDCl<sub>3</sub>)

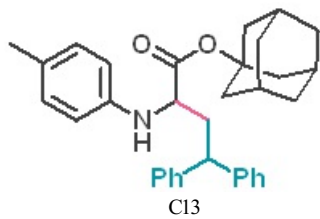

—173.20  
144.75  
144.32  
143.61  
129.59  
128.58  
128.52  
128.05  
127.91  
127.43  
126.43  
126.39  
—114.05

81.60  
77.21  
77.00  
76.79

56.17  
47.41  
41.30  
39.53  
36.07  
30.79

—20.36

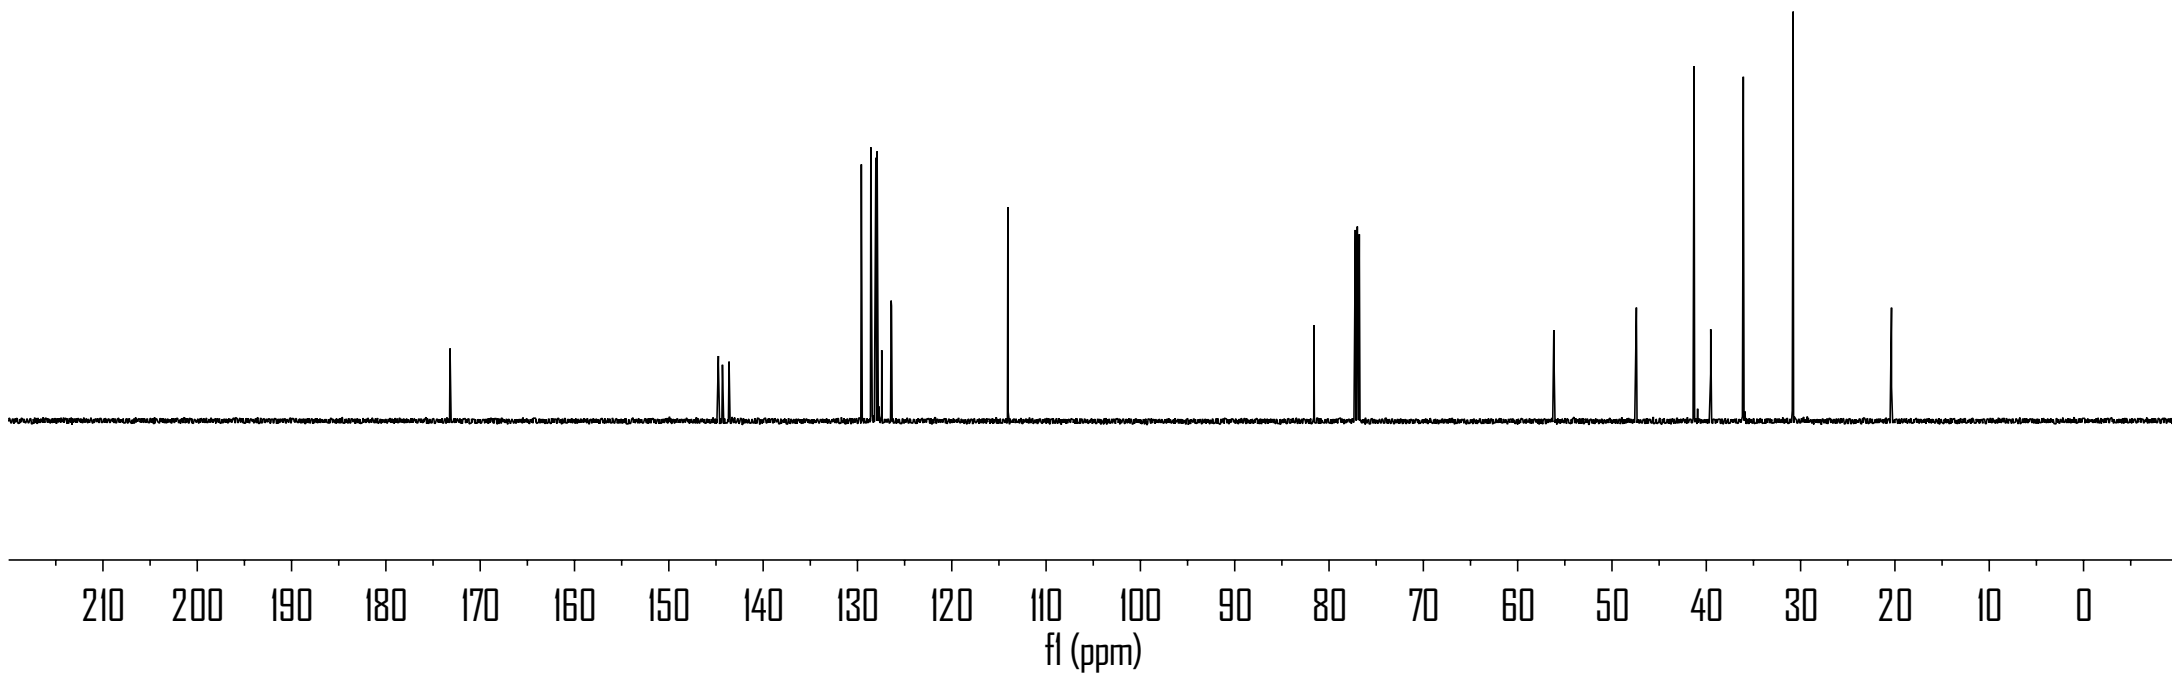

<sup>13</sup>C NMR (151 MHz, CDCl<sub>3</sub>)

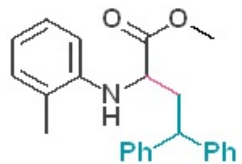

C14

—174.66

144.82

144.18

143.49

130.32

128.66

128.59

127.99

127.82

126.99

126.56

126.48

122.92

118.04

110.71

77.21

77.00

76.79

~55.19

~52.10

~47.43

~39.15

—17.40

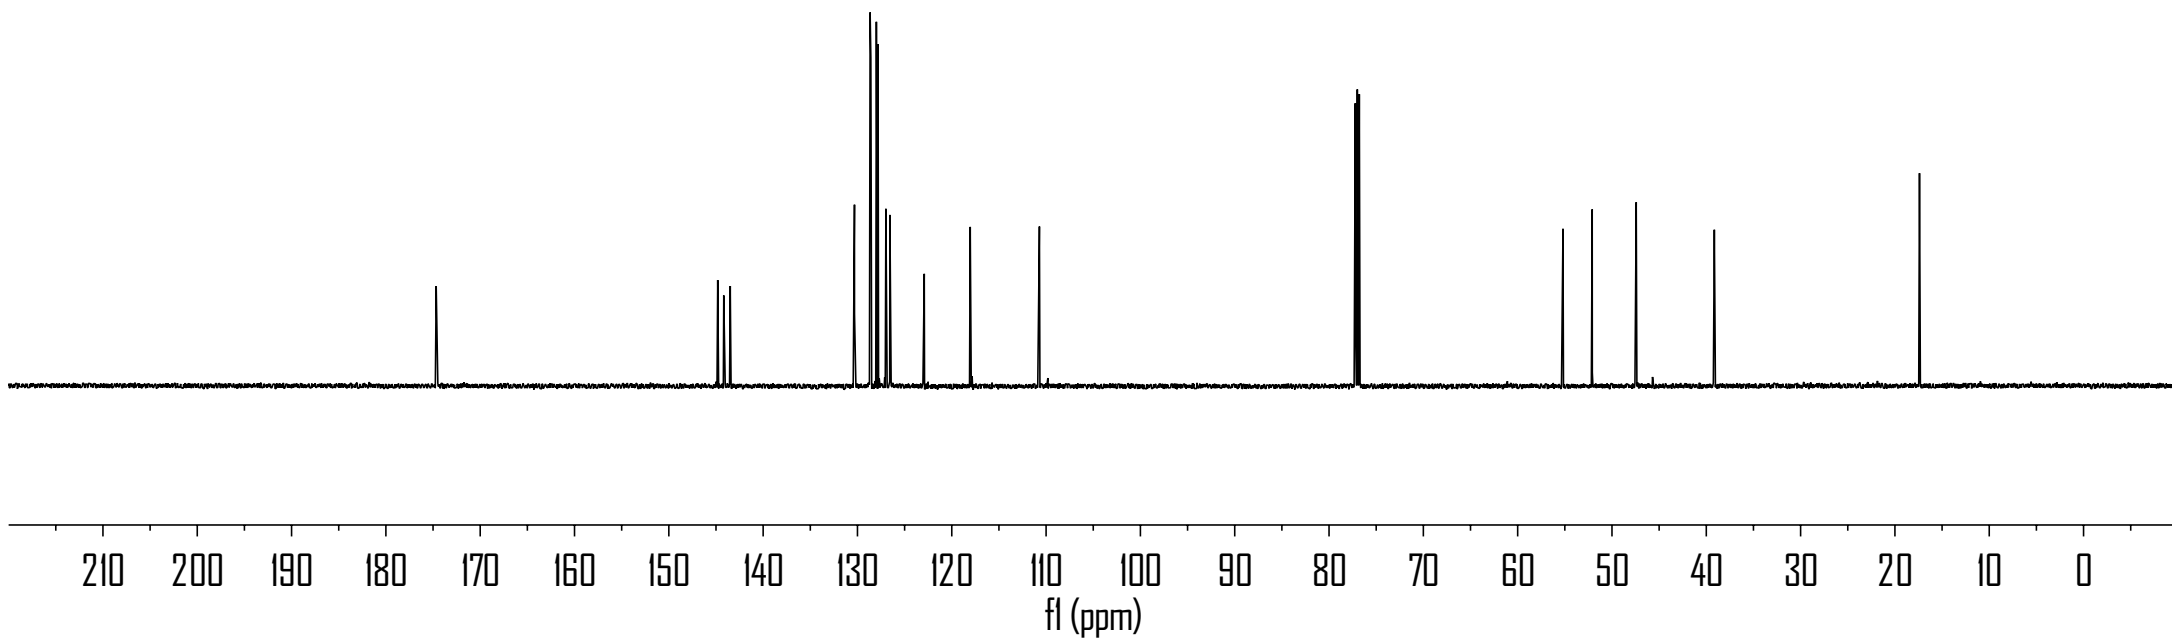

<sup>13</sup>C NMR (151 MHz, CDCl<sub>3</sub>)

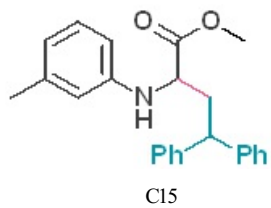

—174.59

146.85

144.18

143.33

139.00

129.08

128.63

128.54

128.07

127.80

126.54

126.43

119.45

114.57

110.89

77.22

77.00

76.79

55.14

52.06

47.21

39.20

—21.48

210 200 190 180 170 160 150 140 130 120 110 100 90 80 70 60 50 40 30 20 10 0

fl (ppm)

<sup>13</sup>C NMR (151 MHz, CDCl<sub>3</sub>)

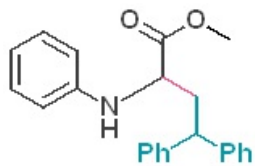

Cl6

—174.53

146.82  
144.12  
143.32  
129.23  
128.65  
128.55  
128.03  
127.79  
126.56  
126.46  
118.53  
113.79

77.21  
77.00  
76.79

55.18  
52.07  
47.23  
39.10

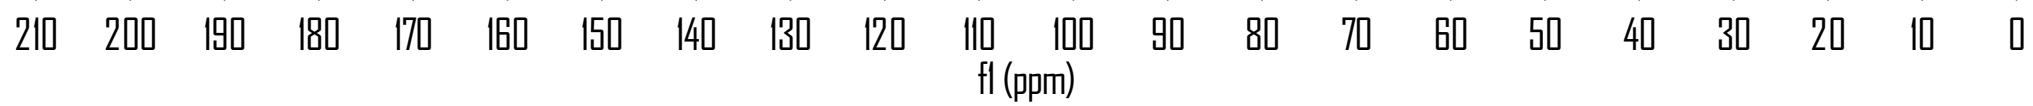



<sup>13</sup>C NMR (151 MHz, CDCl<sub>3</sub>)

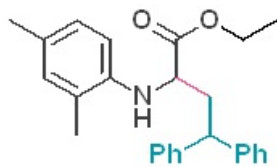

C17

174.28  
144.97  
144.28  
143.45  
137.25  
130.20  
128.61  
128.53  
128.23  
128.10  
127.84  
126.49  
126.40  
-115.76  
-111.36

77.21  
77.00  
76.79

60.99  
55.60  
47.24  
39.26

19.88  
18.66  
14.20

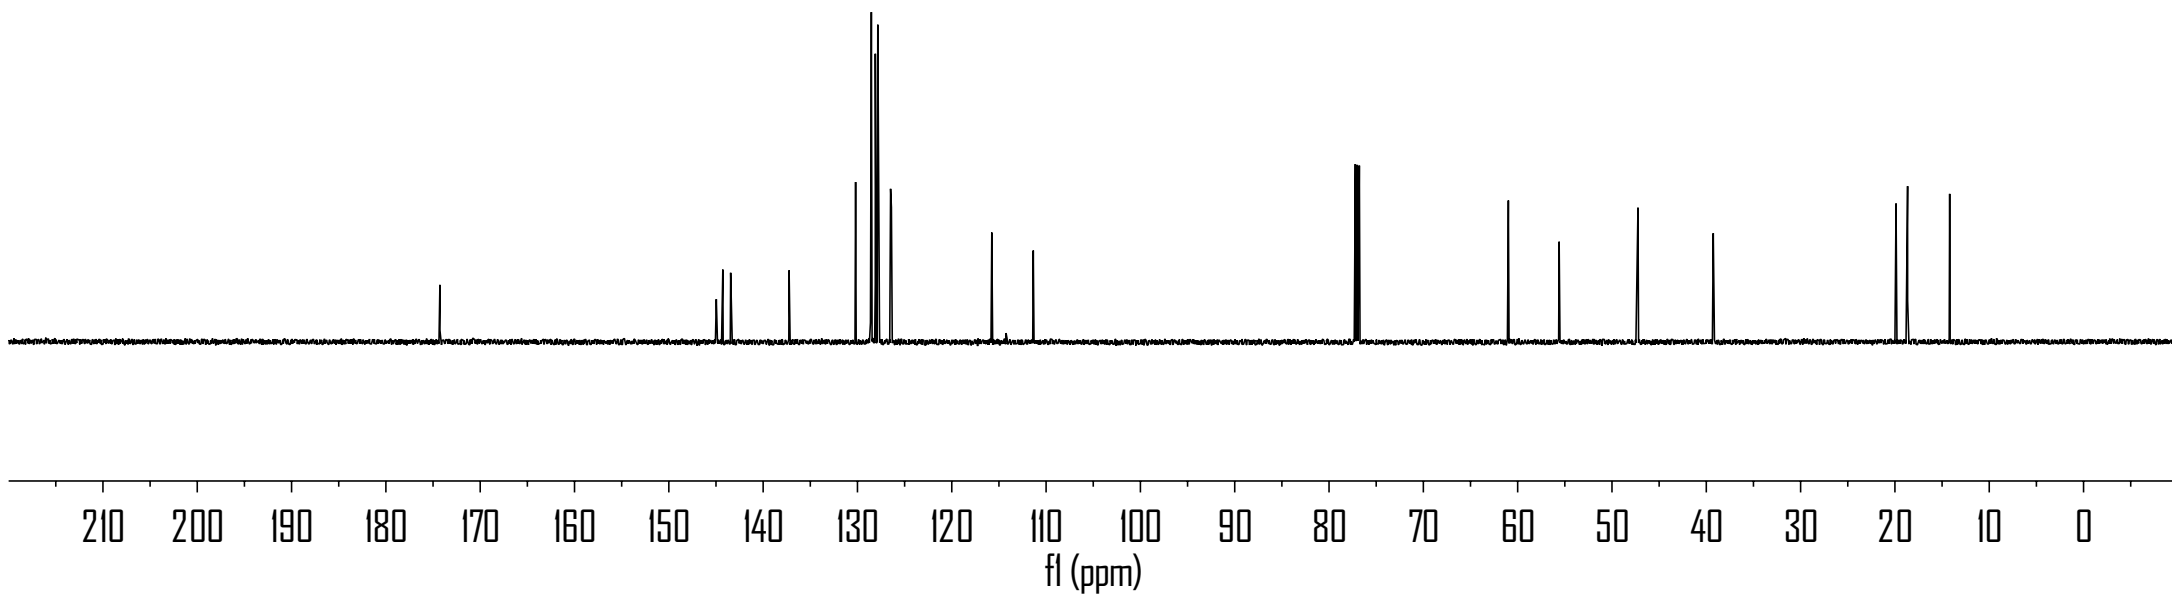

<sup>13</sup>C NMR (151 MHz, CDCl<sub>3</sub>)

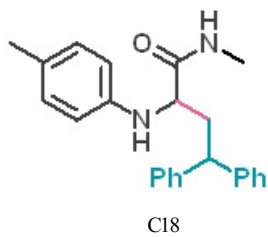

—173.96  
144.27  
144.07  
143.67  
129.77  
128.79  
128.65  
128.36  
127.82  
127.75  
126.60  
126.54  
—113.72

77.21  
77.00  
76.79

—59.09

—48.73

—39.12

—26.03

—20.36

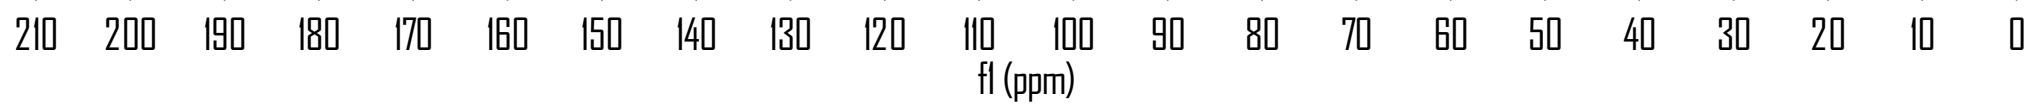

<sup>13</sup>C NMR (151 MHz, CDCl<sub>3</sub>)

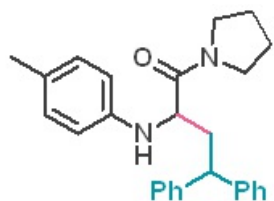

C19

171.76  
145.20  
144.19  
144.15  
129.71  
128.48  
128.45  
128.16  
127.69  
127.58  
126.47  
126.30  
114.45

77.21  
77.00  
76.79

54.29  
47.32  
45.70  
45.64  
39.02

25.87  
23.96  
20.33



<sup>13</sup>C NMR (151 MHz, CDCl<sub>3</sub>)

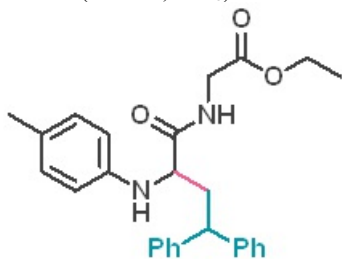

C20

173.94  
169.55  
144.18  
144.09  
143.57  
129.68  
128.69  
128.62  
128.19  
127.84  
127.70  
126.50  
113.73

77.21  
77.00  
76.79

61.32  
58.72

48.32  
41.04  
39.00

20.32  
14.03

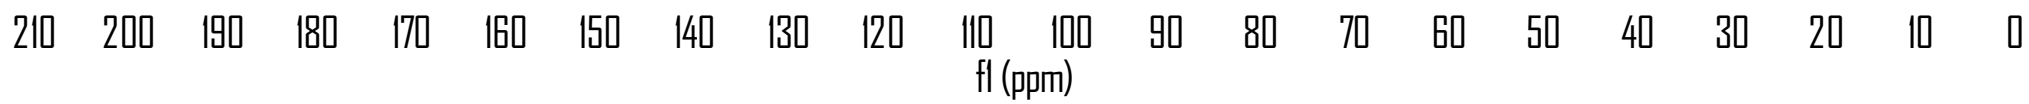

173.58  
 173.43  
 171.81  
 171.27  
 144.29  
 144.16  
 144.12  
 144.04  
 143.60  
 143.54  
 129.66  
 129.63  
 128.77  
 128.72  
 128.66  
 128.33  
 128.21  
 127.91  
 127.84  
 127.76  
 127.73  
 126.58  
 126.53  
 126.51  
 114.21  
 113.70  
 77.21  
 77.00  
 76.79  
 61.15  
 61.05  
 59.10  
 58.97  
 57.07  
 56.77  
 48.44  
 48.38  
 39.17  
 39.11  
 31.11  
 31.08  
 20.38  
 20.36  
 18.99  
 17.74  
 17.41  
 14.17  
 14.01

<sup>13</sup>C NMR (151 MHz, CDCl<sub>3</sub>)

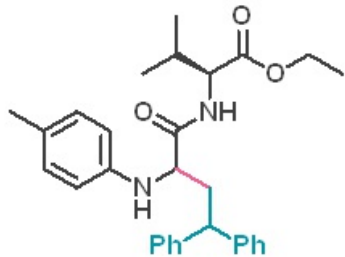

C21 (dr = 1.2:1)

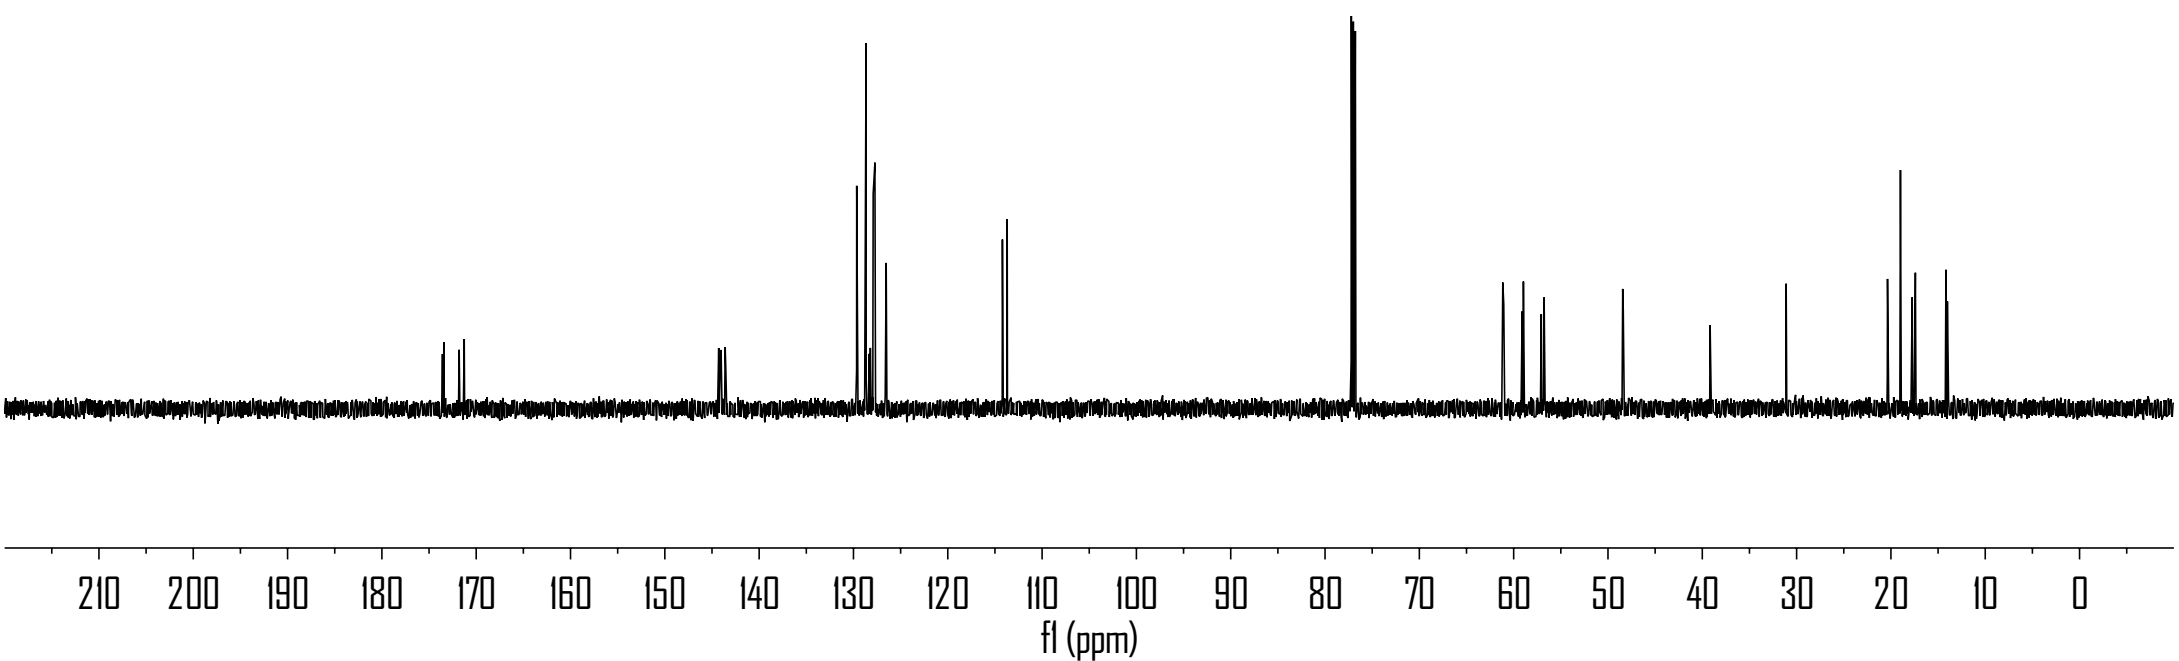

173.11  
173.06  
170.60  
170.26  
144.14  
144.08  
143.58  
143.56  
136.42  
136.36  
129.69  
129.65  
128.91  
128.73  
128.69  
128.64  
128.44  
128.36  
128.27  
127.86  
127.84  
127.75  
127.19  
126.54  
126.52  
114.22  
113.95  
77.21  
77.00  
76.79  
61.82  
61.72  
58.87  
58.86  
56.52  
56.27  
48.34  
48.23  
39.13  
38.93  
20.41  
20.37  
13.93  
13.88

<sup>13</sup>C NMR (151 MHz, CDCl<sub>3</sub>)

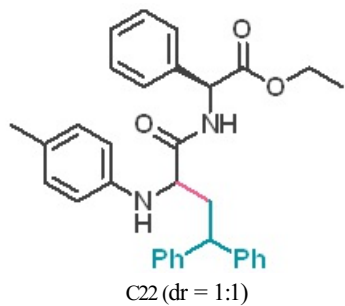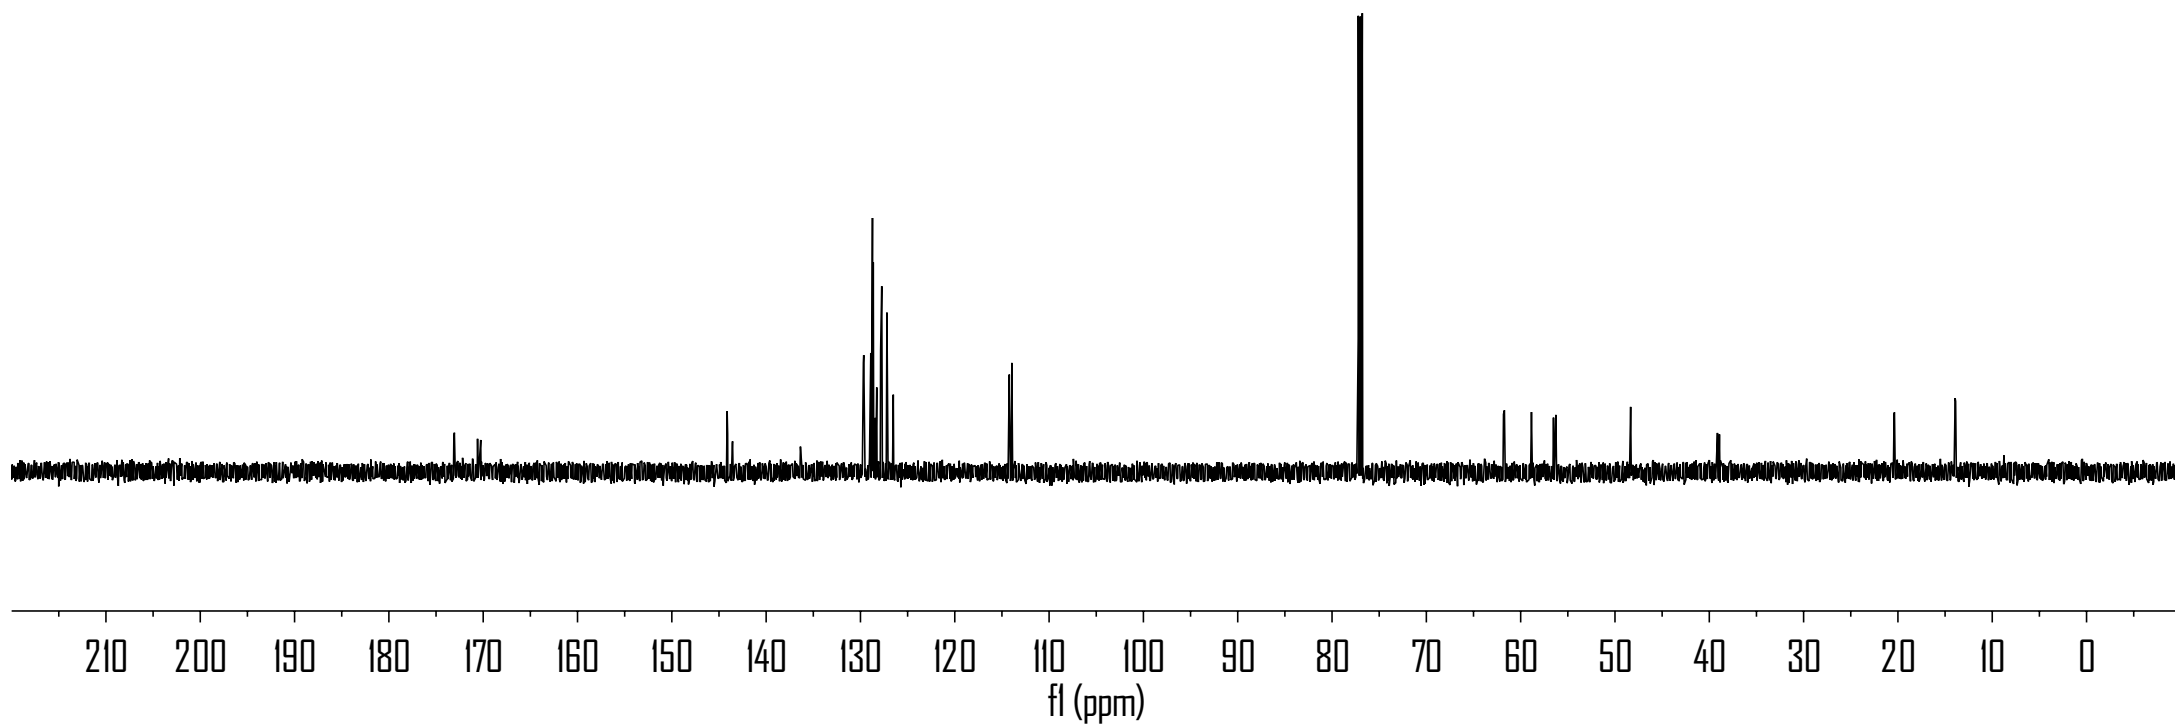

173.33  
 144.03  
 135.98  
 129.63  
 129.54  
 128.65  
 128.59  
 128.56  
 127.99  
 127.85  
 127.81  
 127.71  
 127.67  
 126.45  
 126.43  
 122.99  
 122.68  
 122.11  
 122.00  
 119.51  
 119.47  
 118.54  
 118.47  
 113.95  
 113.54  
 111.25  
 111.02  
 110.10  
 110.08  
 109.48  
 77.21  
 77.00  
 76.79  
 61.40  
 61.32  
 58.66  
 58.57  
 52.85  
 52.04  
 52.02  
 48.26  
 48.17  
 39.04  
 38.72  
 27.49  
 27.44  
 20.39  
 20.35  
 13.97  
 13.89

<sup>13</sup>C NMR (151 MHz, CDCl<sub>3</sub>)

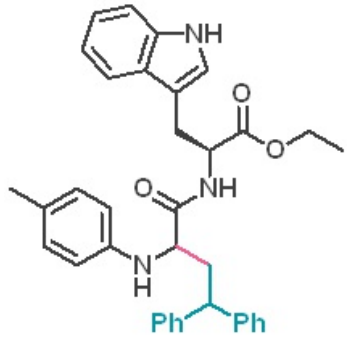

C23 (dr = 1.1:1)

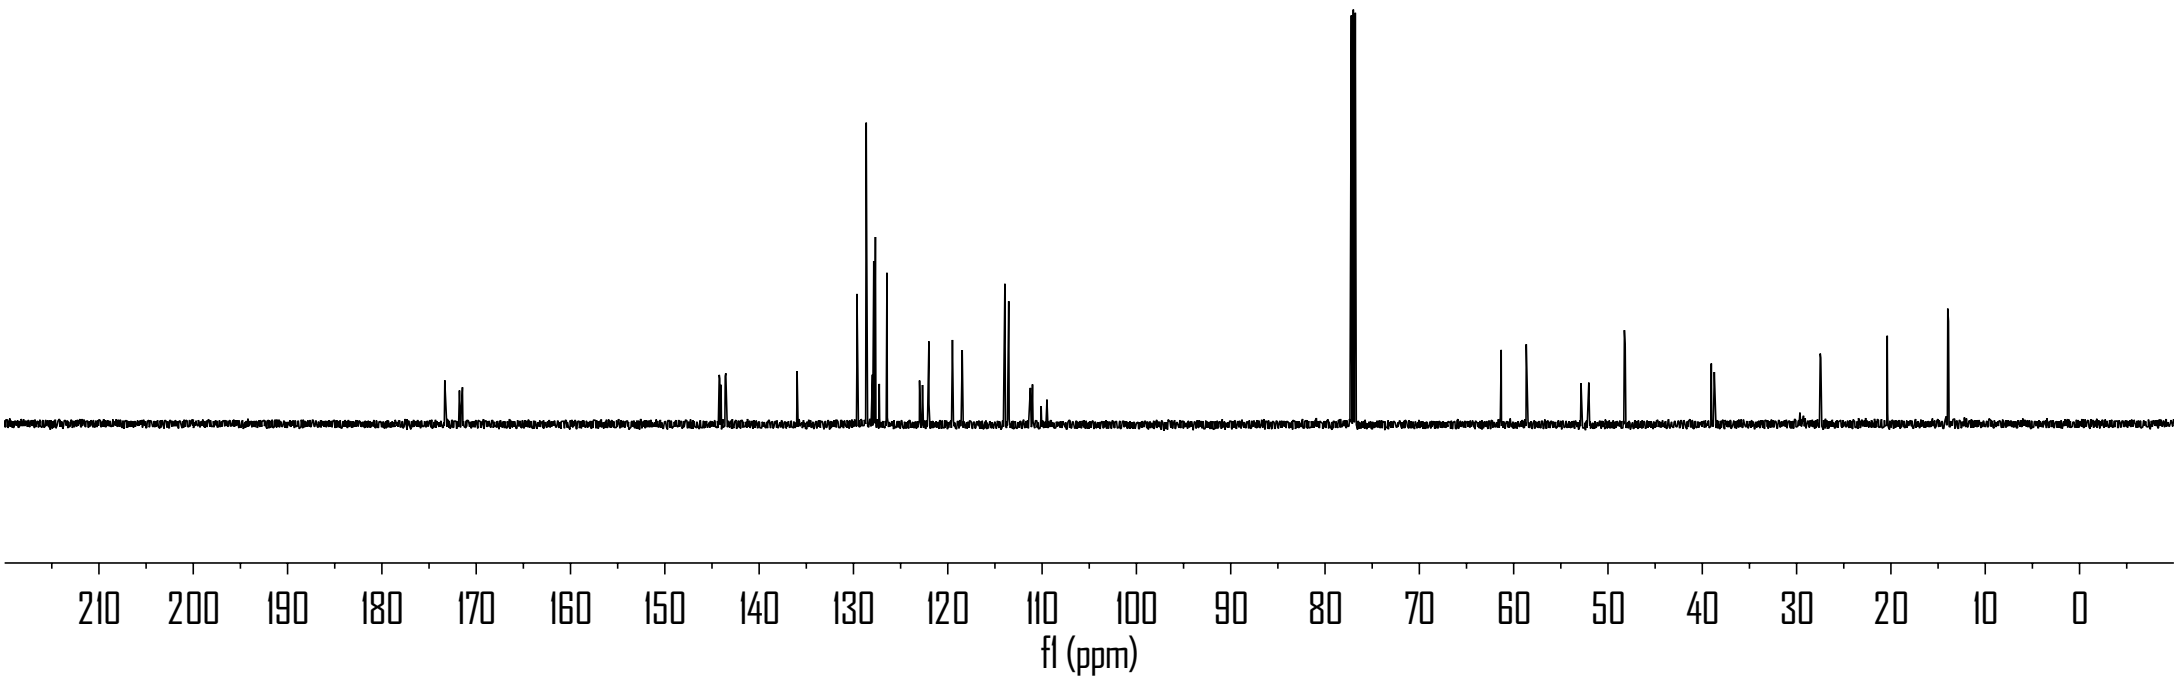

173.55  
 173.40  
 171.66  
 171.26  
 144.17  
 144.08  
 144.04  
 143.92  
 143.51  
 143.49  
 129.70  
 129.64  
 128.73  
 128.70  
 128.64  
 128.32  
 128.23  
 127.84  
 127.81  
 127.72  
 127.69  
 126.55  
 126.52  
 114.12  
 113.50  
 77.21  
 77.00  
 76.79  
 61.53  
 61.46  
 58.79  
 58.74  
 51.50  
 51.10  
 48.37  
 48.27  
 39.06  
 38.91  
 31.51  
 31.46  
 29.96  
 29.69  
 20.35  
 20.31  
 15.38  
 15.18  
 14.07  
 13.96

<sup>13</sup>C NMR (151 MHz, CDCl<sub>3</sub>)

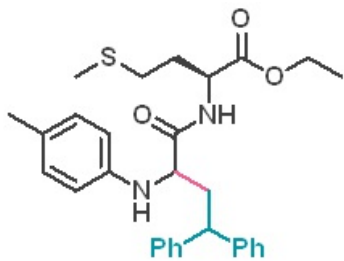

C24 (dr = 1.3:1)

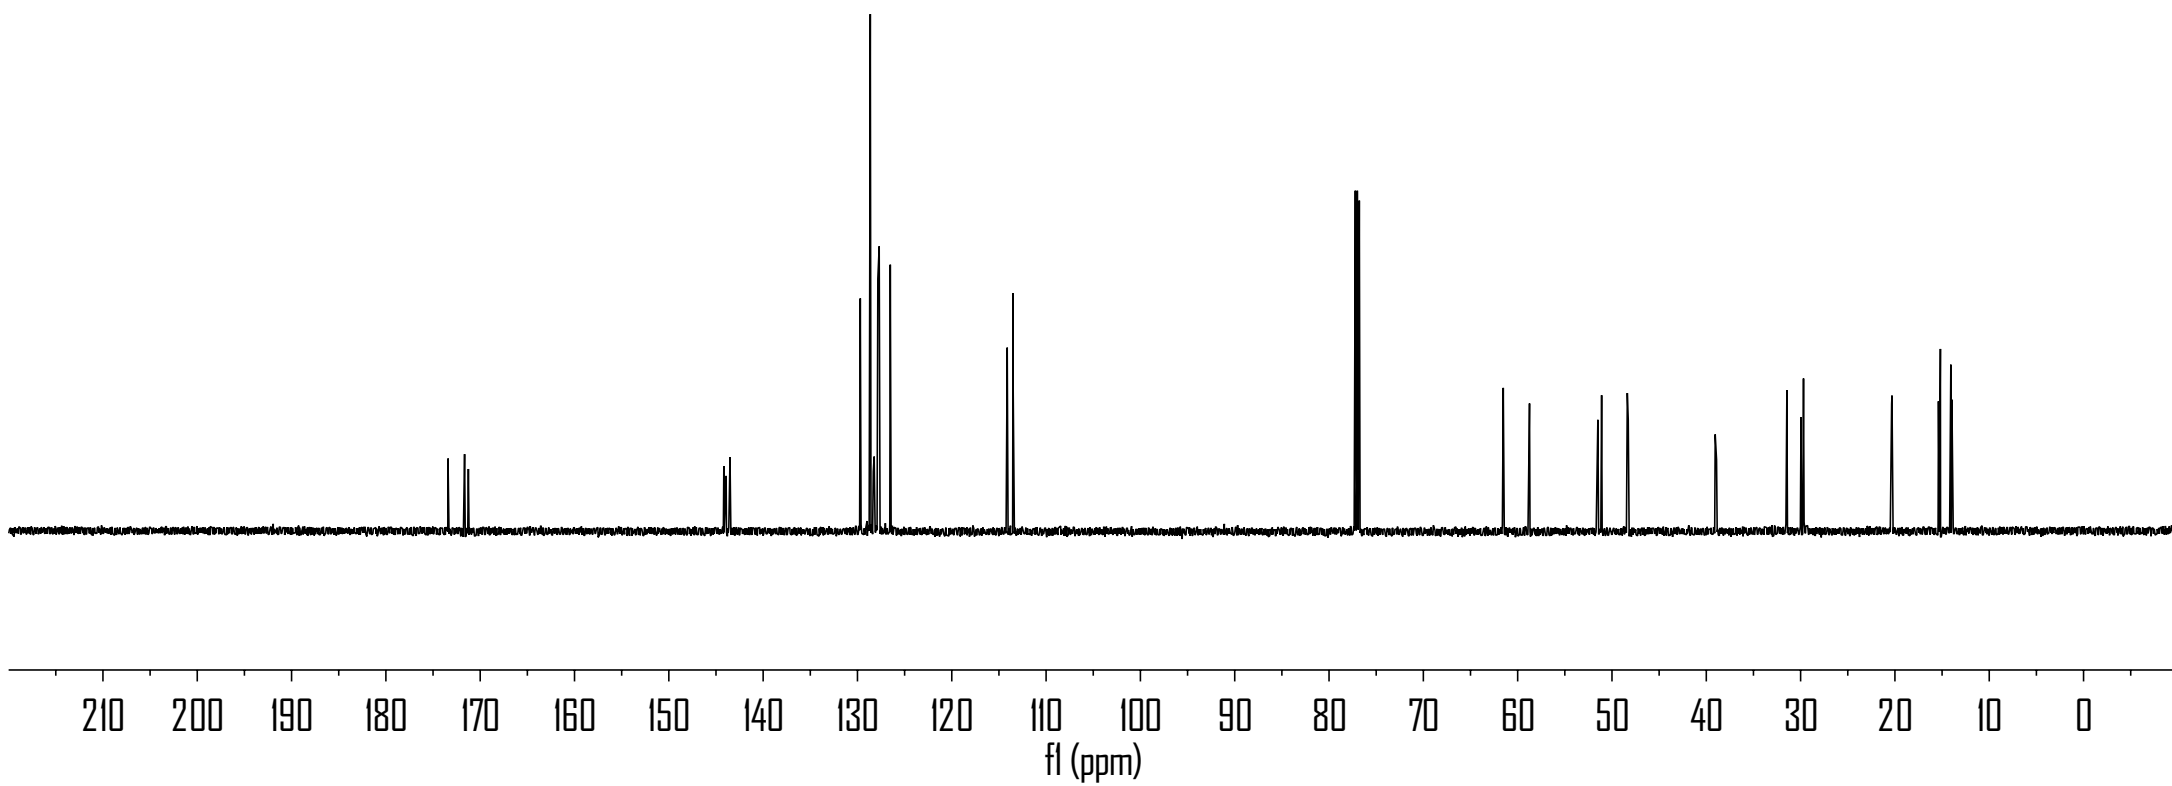



<sup>13</sup>C NMR (151 MHz, CDCl<sub>3</sub>)

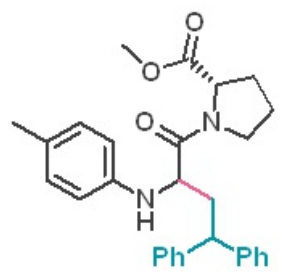

C25 (dr = 6:1)

172.25  
171.98

144.76  
144.19  
144.03  
129.76  
129.64  
128.53  
128.49  
128.06  
127.80  
127.53  
126.47  
126.45  
114.32

77.21  
77.00  
76.79

58.94  
54.20  
52.00  
47.40  
46.09  
38.55

28.85  
24.59  
20.37

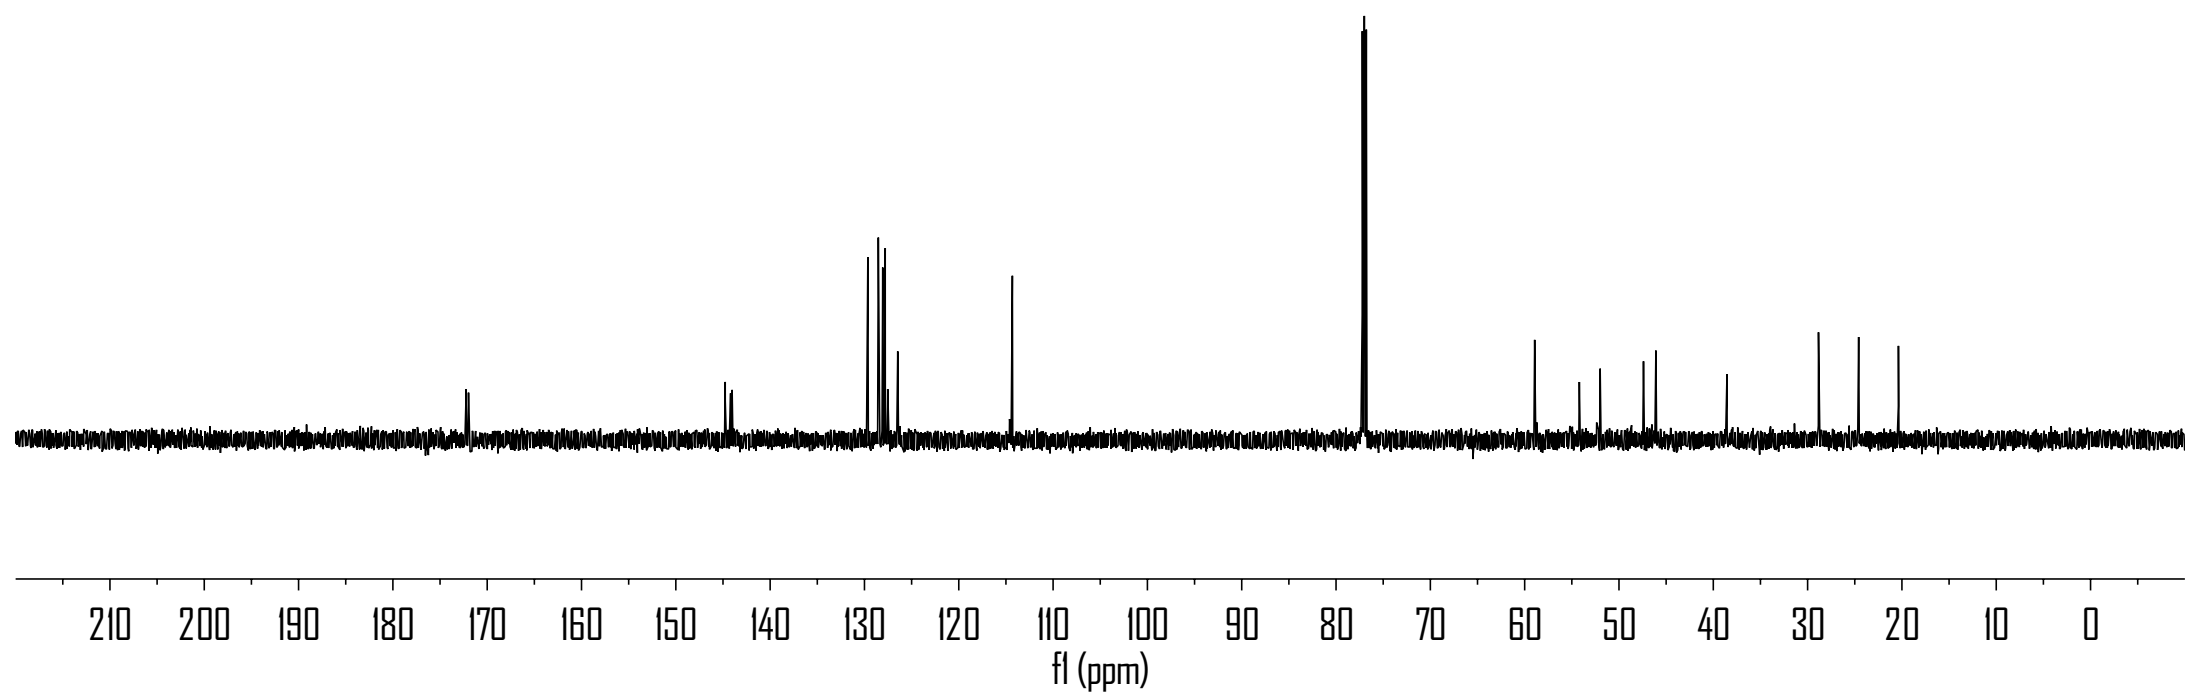

<sup>13</sup>C NMR (151 MHz, CDCl<sub>3</sub>)

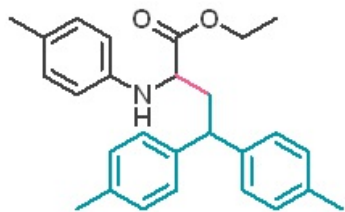

C26

—174.35  
144.64  
141.47  
140.68  
135.90  
135.84  
129.67  
129.29  
129.20  
127.84  
127.70  
127.62  
—114.10

77.21  
77.00  
76.78

—60.96  
—55.74

—46.46  
—39.32

20.97  
20.95  
20.37  
14.20



<sup>13</sup>C NMR (151 MHz, CDCl<sub>3</sub>)

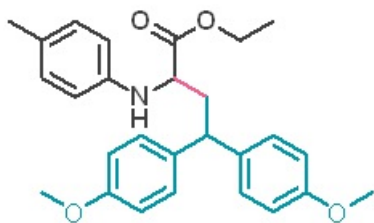

C27

—174.35

158.09

158.03

144.66

136.75

135.93

129.68

128.89

128.64

127.68

114.06

113.98

113.88

77.21

77.00

76.79

60.96

55.66

55.21

55.20

—45.56

—39.57

—20.36

—14.20



<sup>13</sup>C NMR (151 MHz, CDCl<sub>3</sub>)

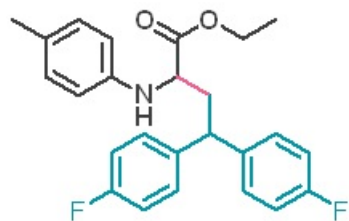

— 174.06  
— 162.39  
— 162.31  
— 160.77  
— 160.68  
— 144.48  
— 139.77  
— 139.74  
— 138.97  
— 138.94  
— 129.76  
— 129.45  
— 129.40  
— 129.19  
— 129.14  
— 128.02  
— 115.62  
— 115.47  
— 115.33  
— 114.11  
— 77.21  
— 77.00  
— 76.79  
— 61.13  
— 55.49  
— 45.66  
— 39.36  
— 20.37  
— 14.19

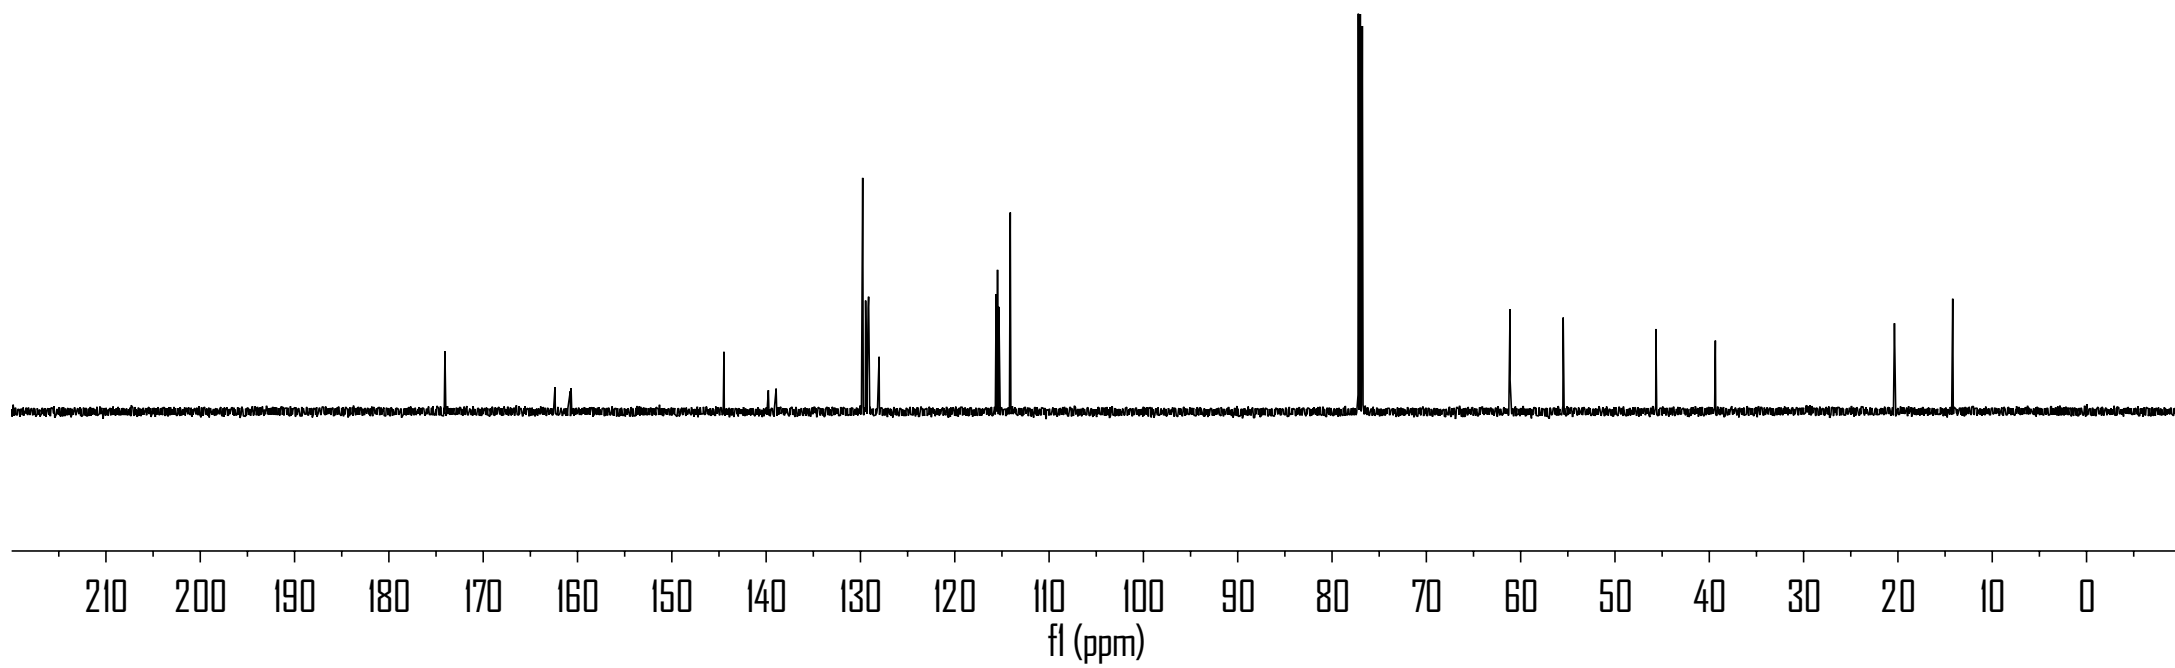

<sup>13</sup>C NMR (151 MHz, CDCl<sub>3</sub>)

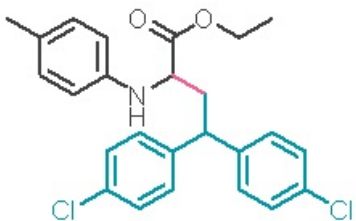

C29

—173.94  
144.39  
142.18  
141.42  
132.53  
132.41  
129.76  
129.34  
129.06  
128.88  
128.73  
128.06  
—114.13

77.21  
77.00  
76.79

—61.15  
—55.39  
—45.90  
—38.88

—20.35  
—14.16

210 200 190 180 170 160 150 140 130 120 110 100 90 80 70 60 50 40 30 20 10 0

fl (ppm)

<sup>13</sup>C NMR (151 MHz, CDCl<sub>3</sub>)

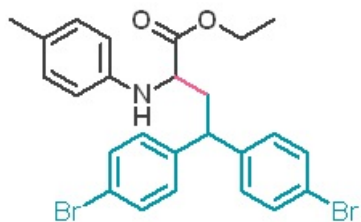

C30

—173.94

144.38  
142.64  
141.87  
131.88  
131.73  
129.79  
129.75  
129.47  
128.14  
120.68  
120.53  
114.16

77.21  
77.00  
76.79

—61.19  
—55.41  
—46.06  
—38.77

—20.38  
—14.19



174.22  
144.61  
144.58  
144.13  
143.35  
143.32  
142.55  
140.79  
140.77  
139.35  
139.33  
129.70  
128.71  
128.69  
128.59  
128.45  
128.22  
128.08  
127.85  
127.77  
127.75  
127.32  
127.25  
127.13  
126.97  
126.95  
126.60  
126.51  
114.11  
114.08  
77.21  
77.00  
76.79  
61.03  
55.70  
55.66  
46.96  
46.94  
39.19  
39.15  
20.36  
14.20

<sup>13</sup>C NMR (151 MHz, CDCl<sub>3</sub>)

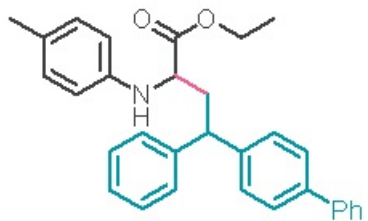

C31 (dr = 6.1:1)

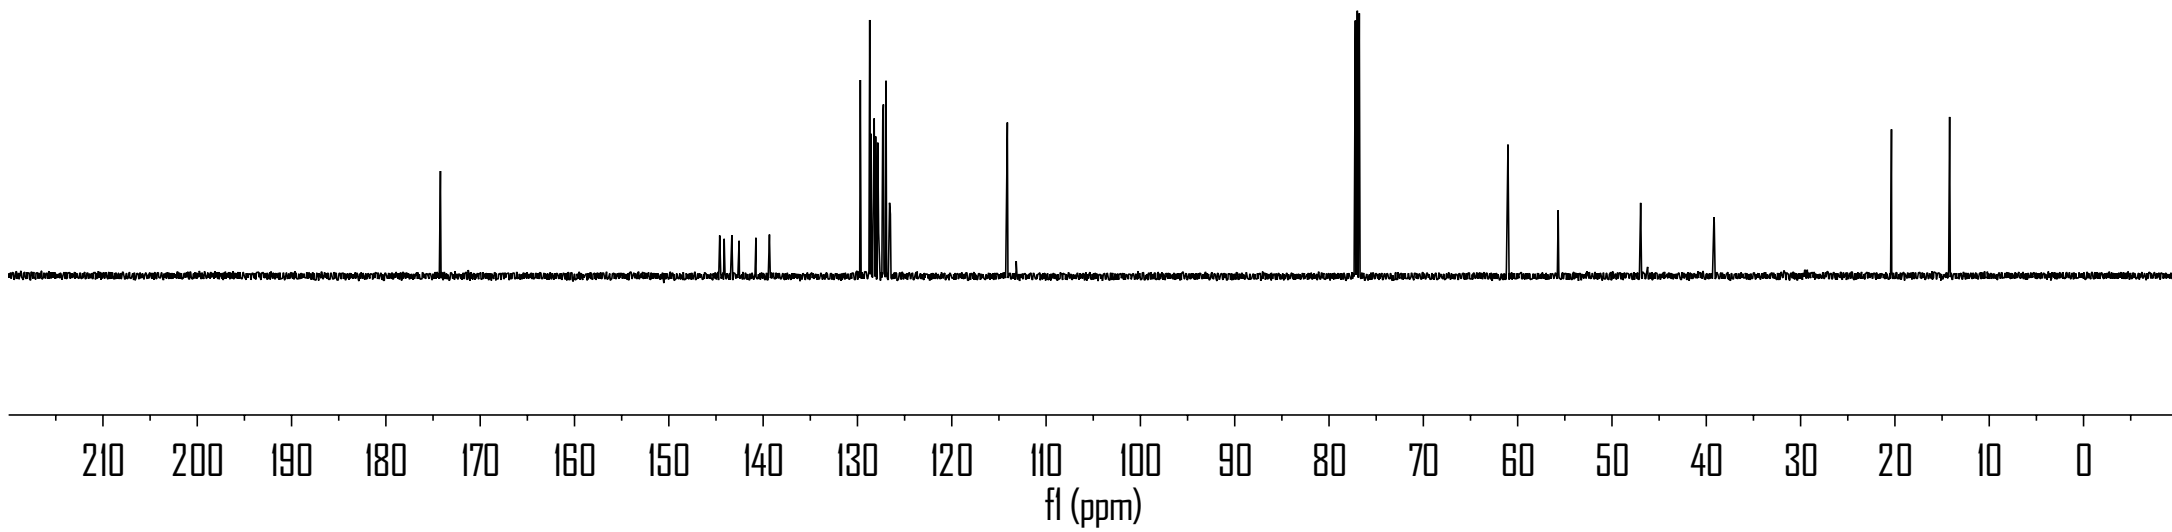

<sup>13</sup>C NMR (151 MHz, CDCl<sub>3</sub>)

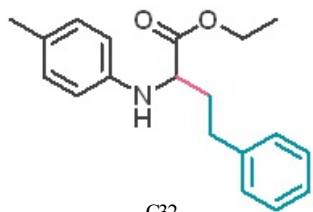

—174.14

~144.55

~140.98

129.78

128.51

128.45

127.61

126.10

113.79

77.21

77.00

76.79

—61.03

—56.49

~34.69

~31.81

—20.37

—14.25

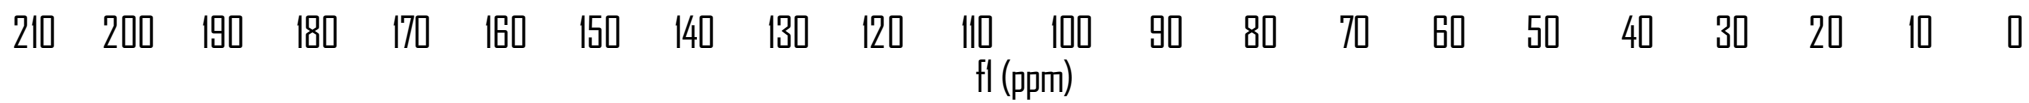



<sup>13</sup>C NMR (151 MHz, CDCl<sub>3</sub>)

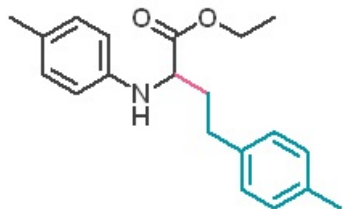

C33

—174.19

144.56  
137.87  
135.57  
129.78  
129.13  
128.38  
127.62

—113.82

77.21  
77.00  
76.79

—61.00  
—56.54

~34.84  
~31.37

~20.99  
~20.38  
~14.25



<sup>13</sup>C NMR (151 MHz, CDCl<sub>3</sub>)

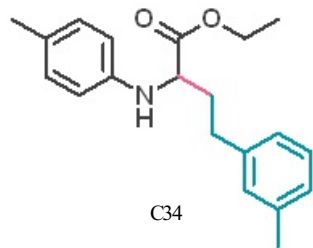

—174.17

144.58  
140.92  
138.02  
129.77  
129.33  
128.35  
127.57  
126.83  
125.49  
—113.78

77.21  
77.00  
76.79

—61.01  
—56.56

~34.74  
~31.75

~21.35  
~20.38  
~14.25

210 200 190 180 170 160 150 140 130 120 110 100 90 80 70 60 50 40 30 20 10 0

fl (ppm)

<sup>13</sup>C NMR (151 MHz, CDCl<sub>3</sub>)

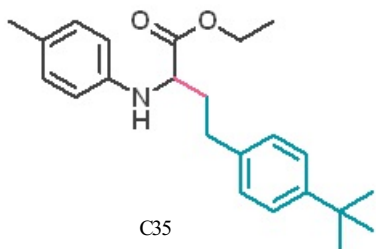

—174.15

↘148.91

↘144.56

↘137.90

↘129.75

↘128.14

↘127.53

↘125.32

—113.76

↘77.21

↘77.00

↘76.79

—60.99

—56.62

↘34.63

↘34.35

↘31.37

↘31.25

—20.37

—14.24



<sup>13</sup>C NMR (151 MHz, CDCl<sub>3</sub>)

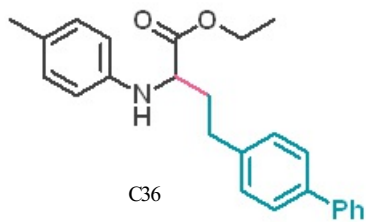

—174.14  
144.55  
140.97  
140.09  
139.10  
129.80  
128.94  
128.73  
127.65  
127.19  
127.09  
126.98  
—113.82

77.21  
77.00  
76.79

—61.07  
—56.51

~34.65  
~31.44

—20.38  
—14.26

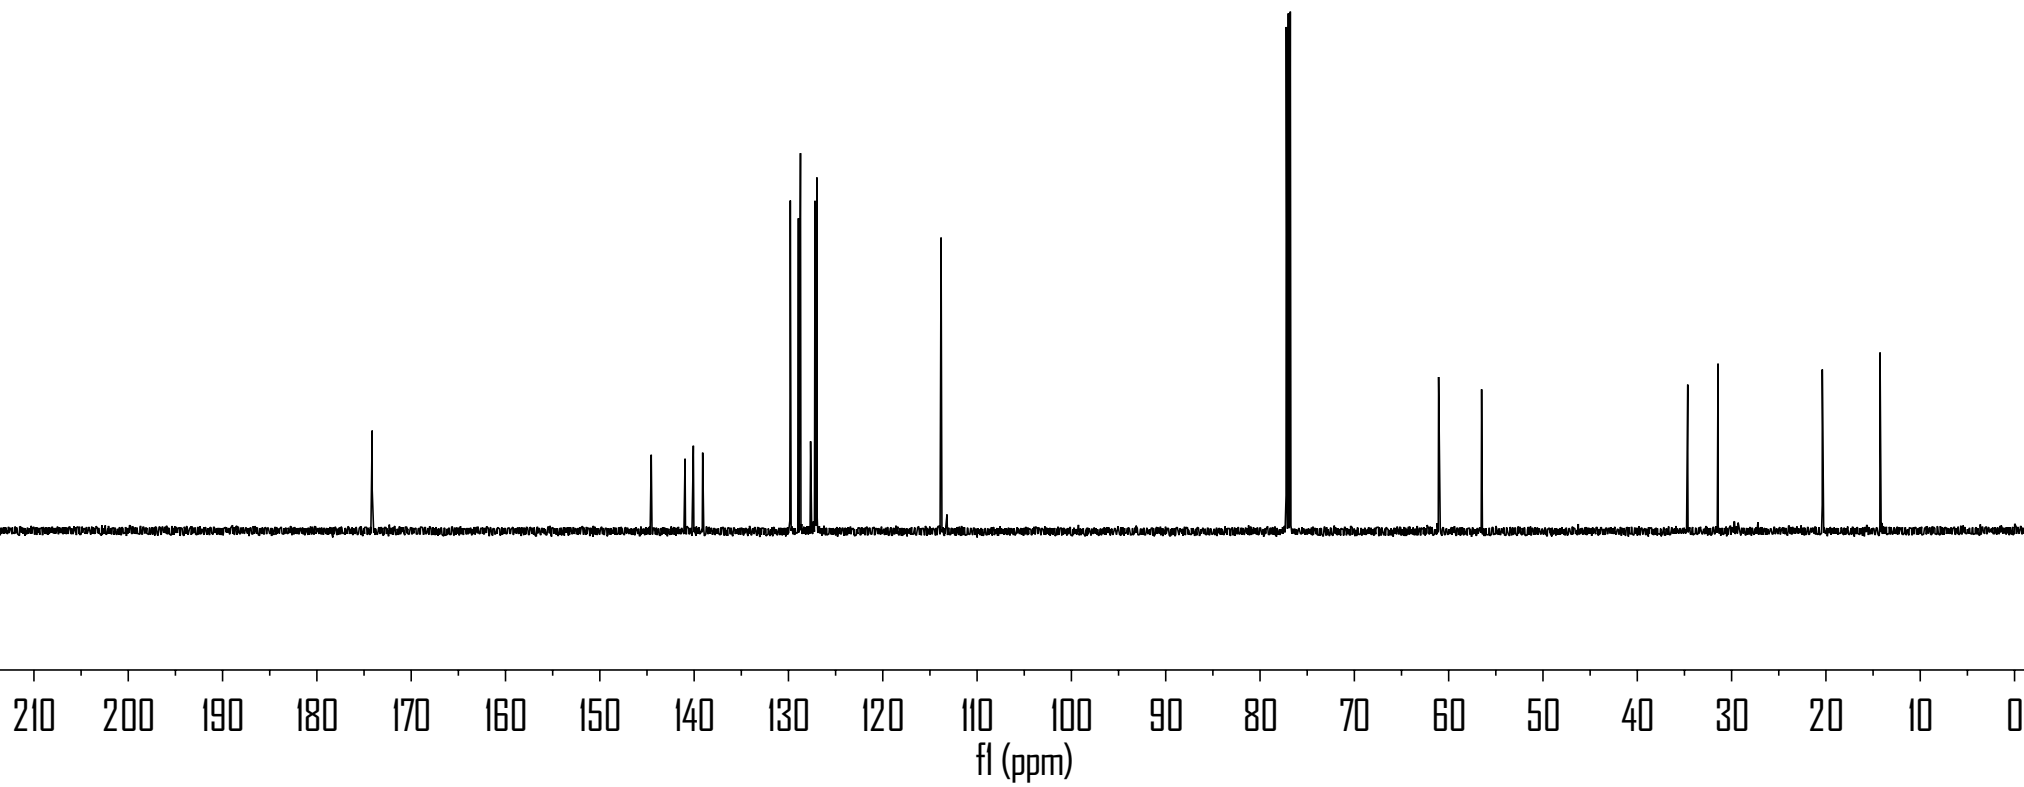

<sup>13</sup>C NMR (151 MHz, CDCl<sub>3</sub>)

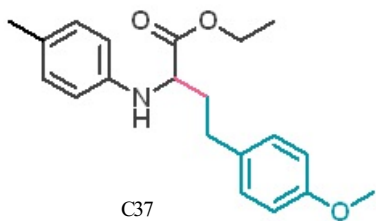

—174.21

—157.98

—144.58

132.98

129.77

129.43

127.57

113.86

113.77

77.21

77.00

76.79

60.99

56.40

55.25

34.93

30.89

20.37

14.25



<sup>13</sup>C NMR (151 MHz, CDCl<sub>3</sub>)

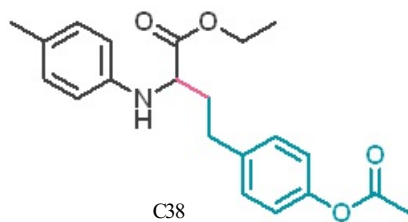

— 174.03  
— 169.55

~ 148.96  
~ 144.48  
— 138.51  
~ 129.78  
~ 129.41  
~ 127.63  
~ 121.46  
~ 113.79

{ 77.21  
{ 77.00  
{ 76.79

— 61.05  
— 56.38

~ 34.56  
~ 31.14

~ 21.07  
~ 20.35  
~ 14.22



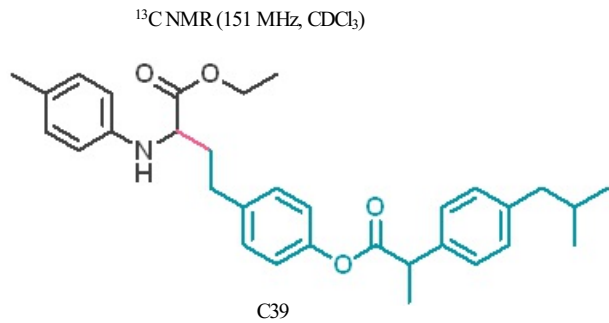

174.06  
173.29

149.17  
144.50  
140.76  
138.37  
137.26  
129.78  
129.47  
129.31  
127.65  
127.19  
121.31  
113.80

77.21  
77.00  
76.79

-61.04  
-56.34

45.23  
45.03  
34.61  
31.14  
30.16  
22.37  
20.37  
18.51  
14.22

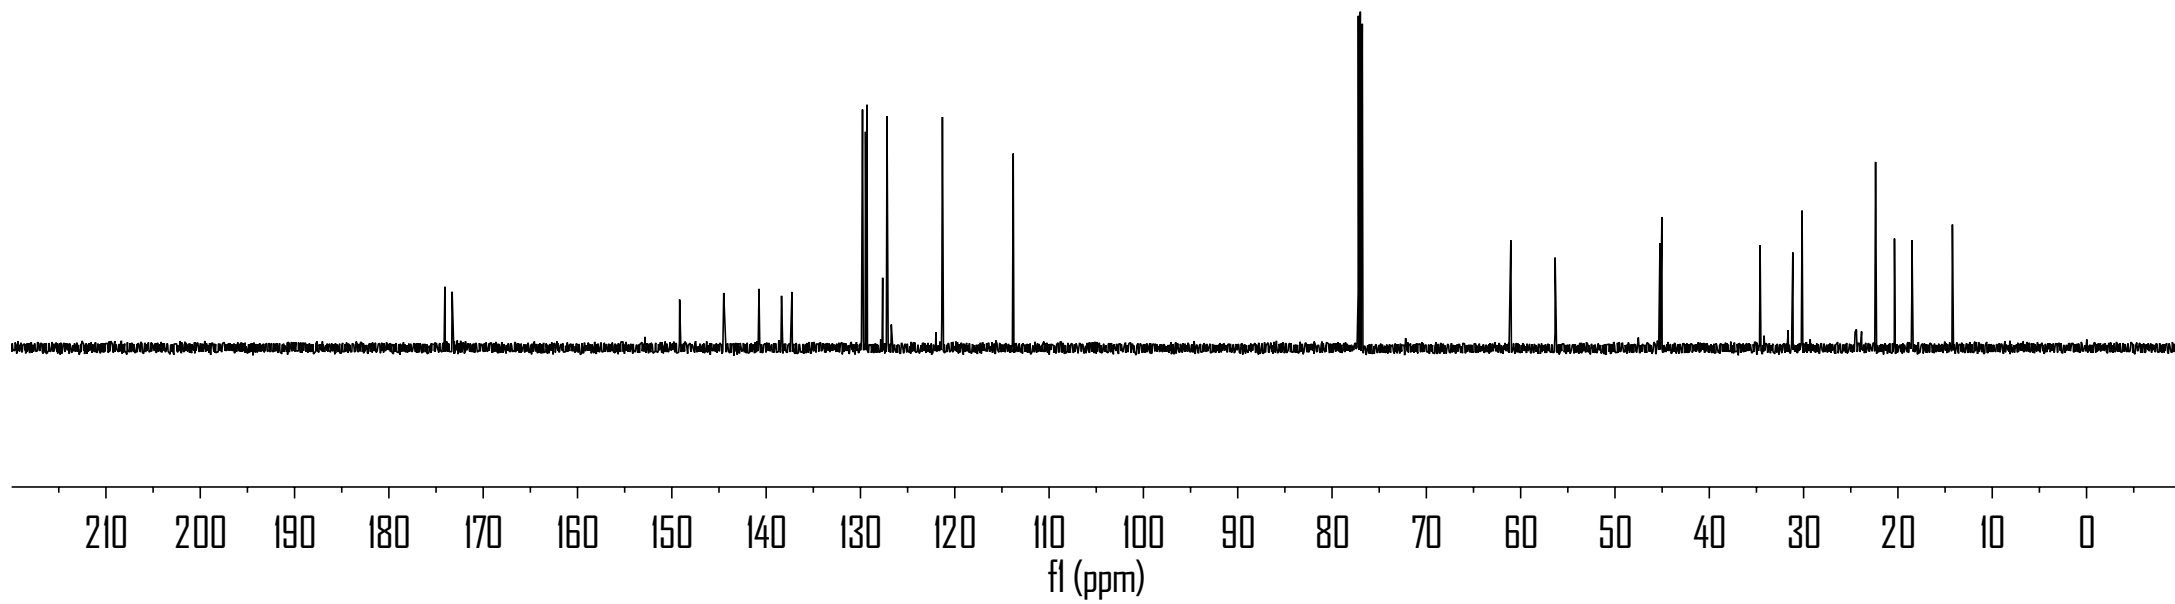

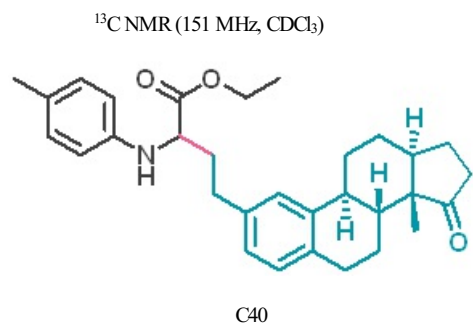

174.17  
 144.59  
 138.45  
 137.54  
 136.52  
 129.77  
 129.15  
 129.11  
 127.59  
 125.93  
 125.92  
 125.46  
 113.79

77.21  
 77.00  
 76.79

61.02  
 56.61  
 50.50  
 47.99  
 44.29  
 38.22  
 35.85  
 34.75  
 31.60  
 31.29  
 29.35  
 26.53  
 25.74  
 21.58  
 20.38  
 14.26  
 13.81

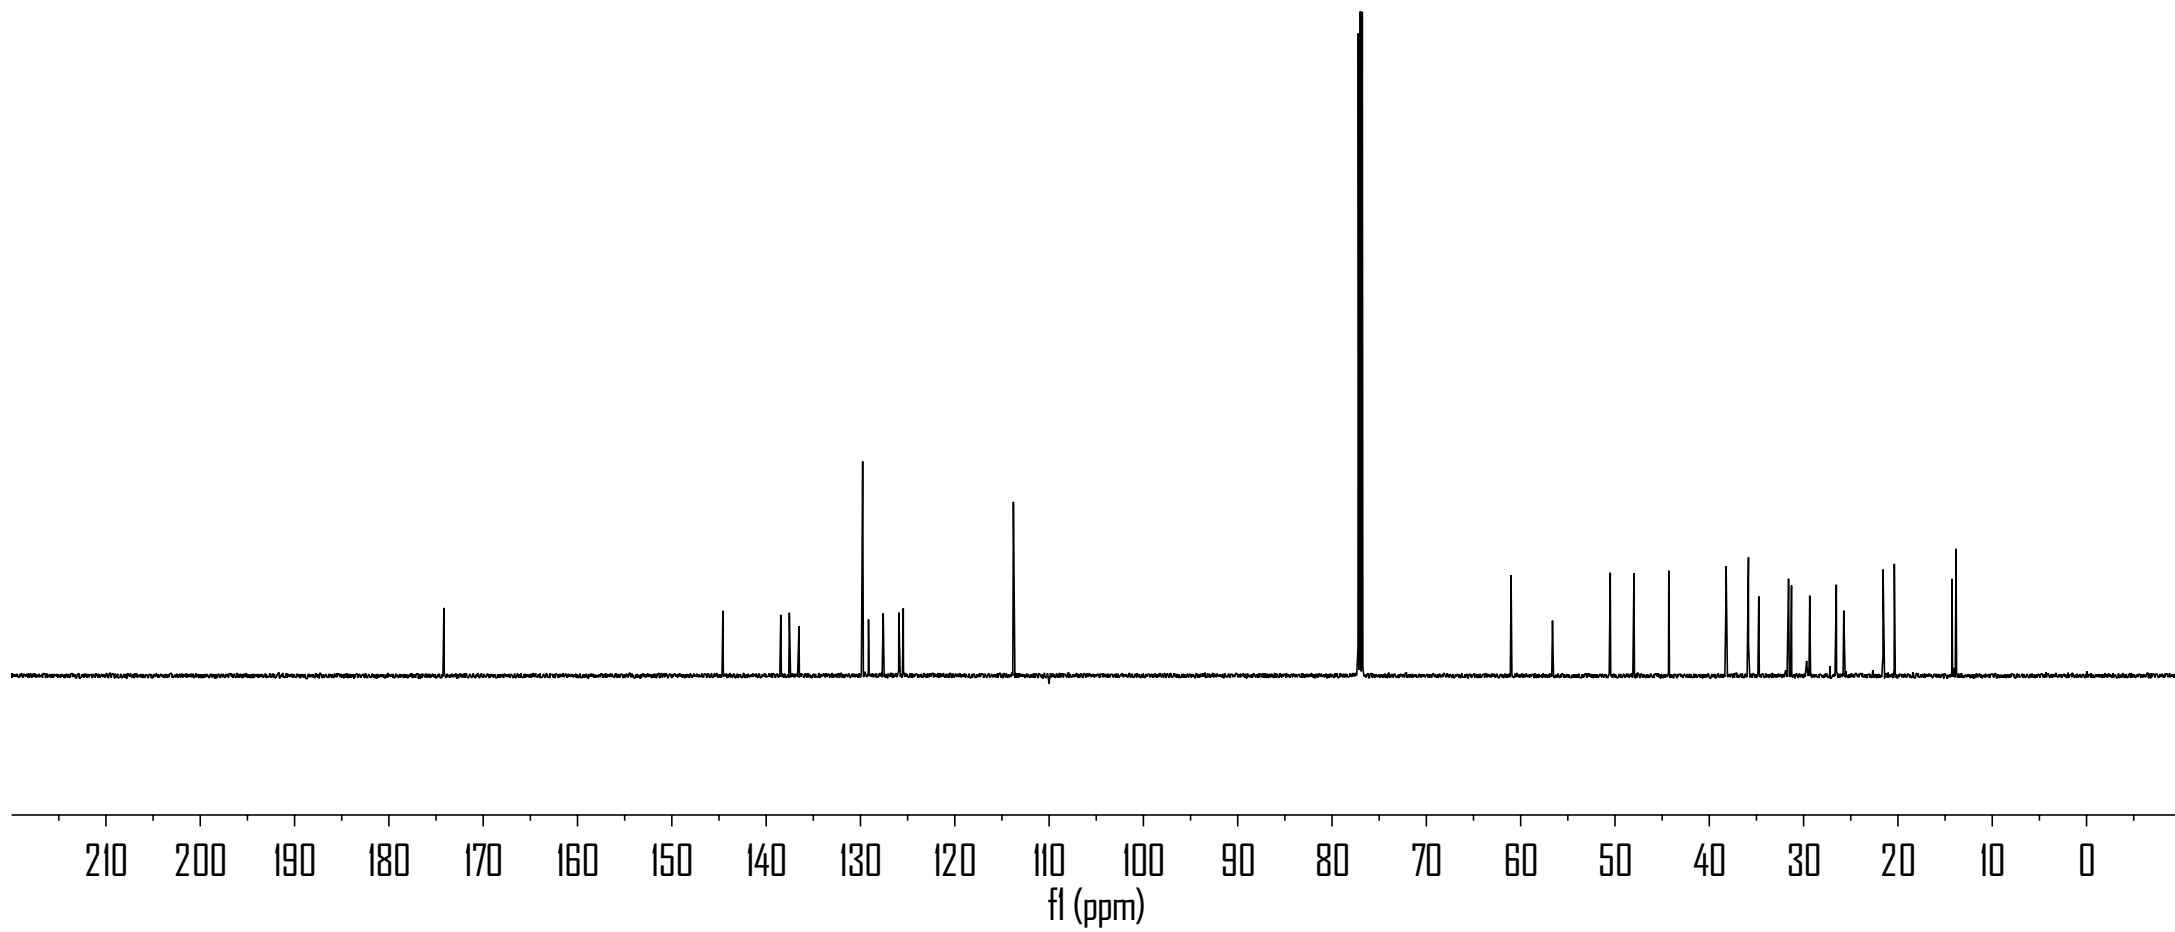



<sup>13</sup>C NMR (151 MHz, CDCl<sub>3</sub>)

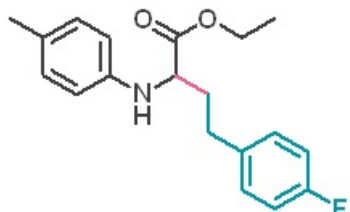

C41

— 174.07

~ 162.22

~ 160.60

144.49

136.55

136.53

129.91

129.86

129.81

127.72

115.27

115.13

113.80

77.21

77.00

76.79

— 61.08

— 56.31

~ 34.76

~ 30.97

— 20.38

— 14.24



<sup>13</sup>C NMR (151 MHz, CDCl<sub>3</sub>)

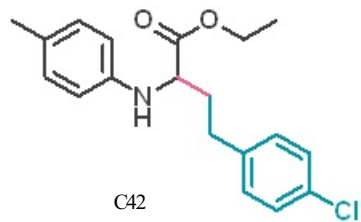

—174.00

144.46

139.38

131.87

129.88

129.81

128.55

127.76

—113.81

77.21

77.00

76.79

—61.10

—56.28

~34.53

~31.12

—20.38

—14.24

210 200 190 180 170 160 150 140 130 120 110 100 90 80 70 60 50 40 30 20 10 0

fl (ppm)

<sup>13</sup>C NMR (151 MHz, CDCl<sub>3</sub>)

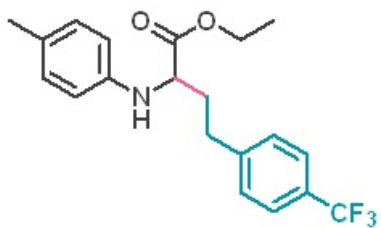

— 173.90

145.11

144.39

129.84

128.86

128.84

128.65

128.43

128.22

127.86

126.98

125.42

125.40

125.37

125.35

125.18

123.38

121.56

113.84

77.21

77.00

76.79

— 61.17

— 56.33

~ 34.30

~ 31.61

— 20.37

— 14.23

210 200 190 180 170 160 150 140 130 120 110 100 90 80 70 60 50 40 30 20 10 0

fl (ppm)

<sup>13</sup>C NMR (151 MHz, CDCl<sub>3</sub>)

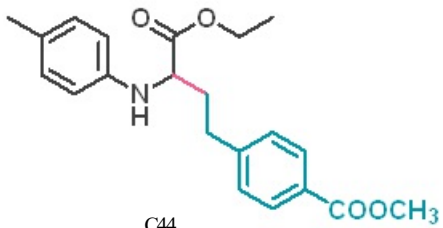

—173.91  
—167.03

~146.46  
~144.37  
129.82  
129.81  
128.55  
128.16  
127.84  
—113.87

77.21  
77.00  
76.79

—61.14  
—56.38  
—52.00

~34.23  
~31.80

—20.38  
—14.23

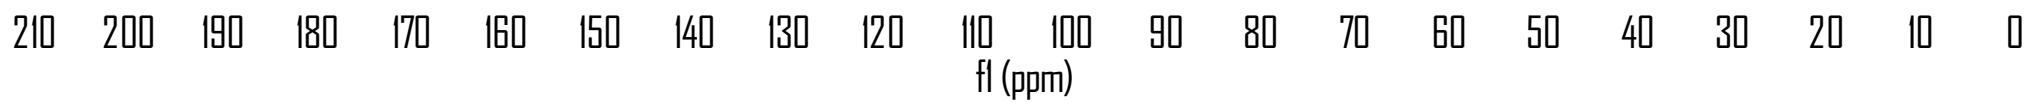

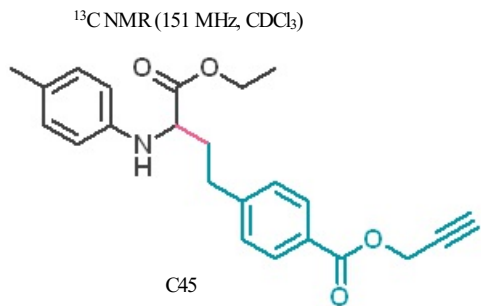

— 173.91

— 165.71

~ 147.01

~ 144.41

130.06

129.83

128.64

127.81

127.39

— 113.83

77.79

77.21

77.00

76.79

74.91

— 61.14

— 56.33

— 52.34

~ 34.23

~ 31.84

— 20.37

— 14.23



<sup>13</sup>C NMR (151 MHz, CDCl<sub>3</sub>)

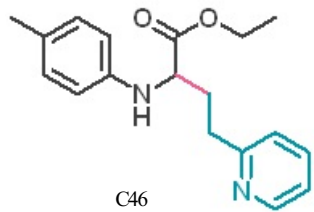

— 174.09

— 160.75

~ 149.34

~ 144.66

~ 136.36

~ 129.75

~ 127.49

~ 123.06

~ 121.25

~ 113.72

{ 77.21

{ 77.00

{ 76.79

— 61.03

— 56.78

~ 34.28

~ 32.59

{ 20.37

{ 20.36

~ 14.21



<sup>13</sup>C NMR (151 MHz, CDCl<sub>3</sub>)

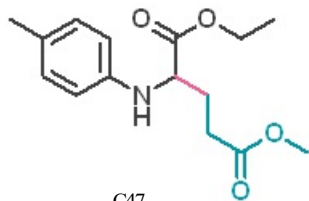

173.63  
173.36

144.39

129.79  
127.77

113.82

77.21  
77.00  
76.79

61.21  
56.37  
51.69

30.15  
27.93  
20.36  
14.17



<sup>13</sup>C NMR (151 MHz, CDCl<sub>3</sub>)

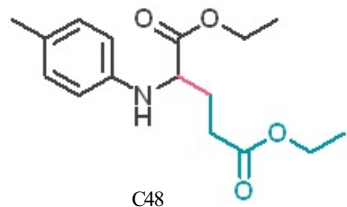

173.69  
172.94

144.41

129.79  
127.78

113.84

77.21  
77.00  
76.79

61.21  
60.56  
56.45

30.45  
27.98  
20.37  
14.19  
14.18





<sup>13</sup>C NMR (151 MHz, CDCl<sub>3</sub>)

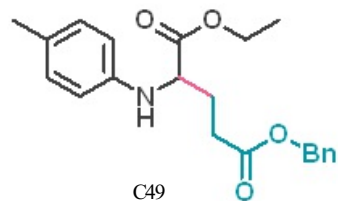

173.63  
172.74

144.40  
135.79  
129.79  
128.54  
128.25  
127.77

113.85

77.21  
77.00  
76.79  
66.42  
61.21  
56.40

30.44  
27.96  
20.37  
14.18

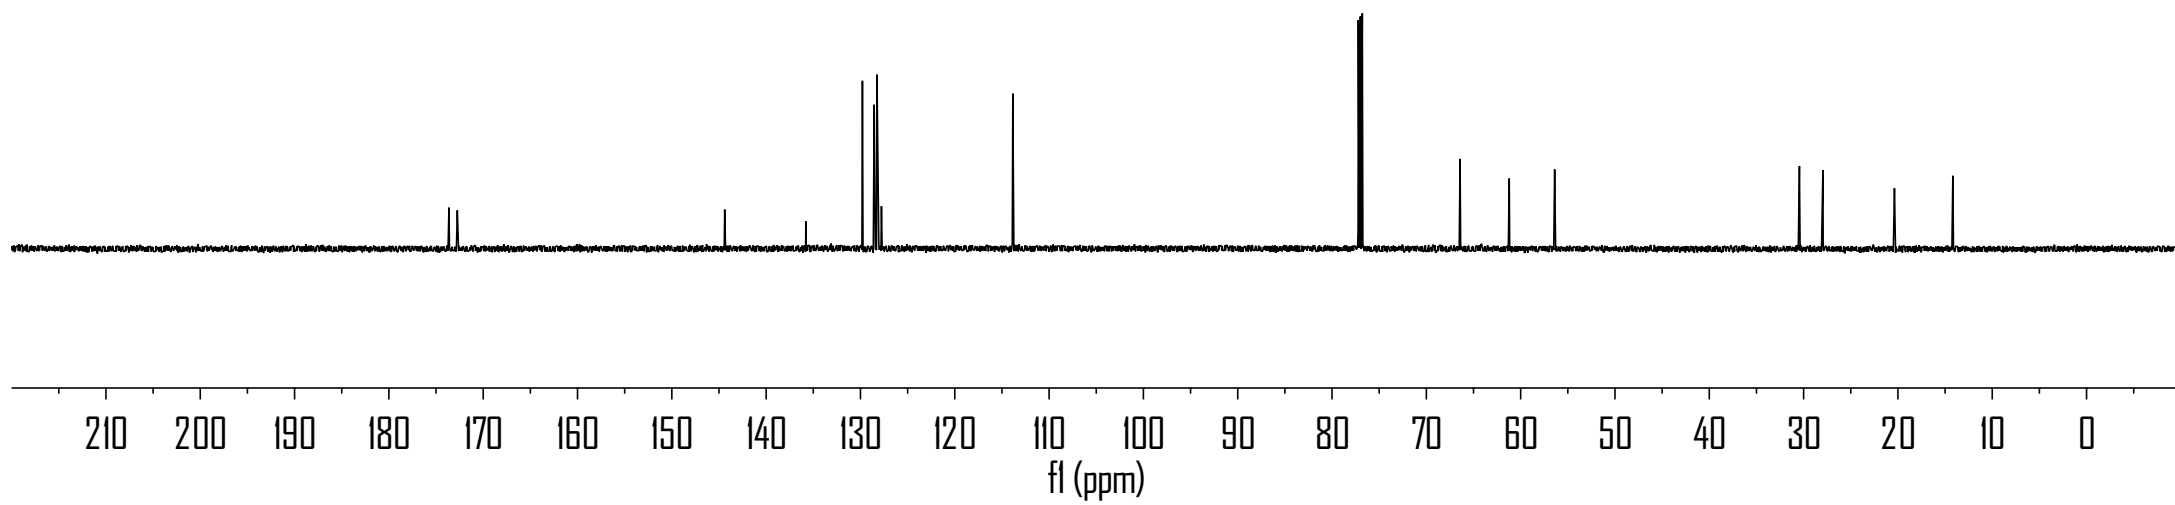

210.50  
210.32

172.75  
172.60

144.91  
144.73

129.85  
129.83  
128.24  
128.04

114.26  
114.05

77.21  
77.00  
76.79  
61.58  
61.41  
61.39  
61.31  
44.95  
43.71  
42.01  
41.84  
41.11  
41.07  
28.12  
26.60  
24.85  
24.74  
20.34  
14.24  
14.22

<sup>13</sup>C NMR (151 MHz, CDCl<sub>3</sub>)

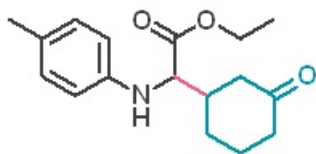

C50 (dr = 1.1:1)

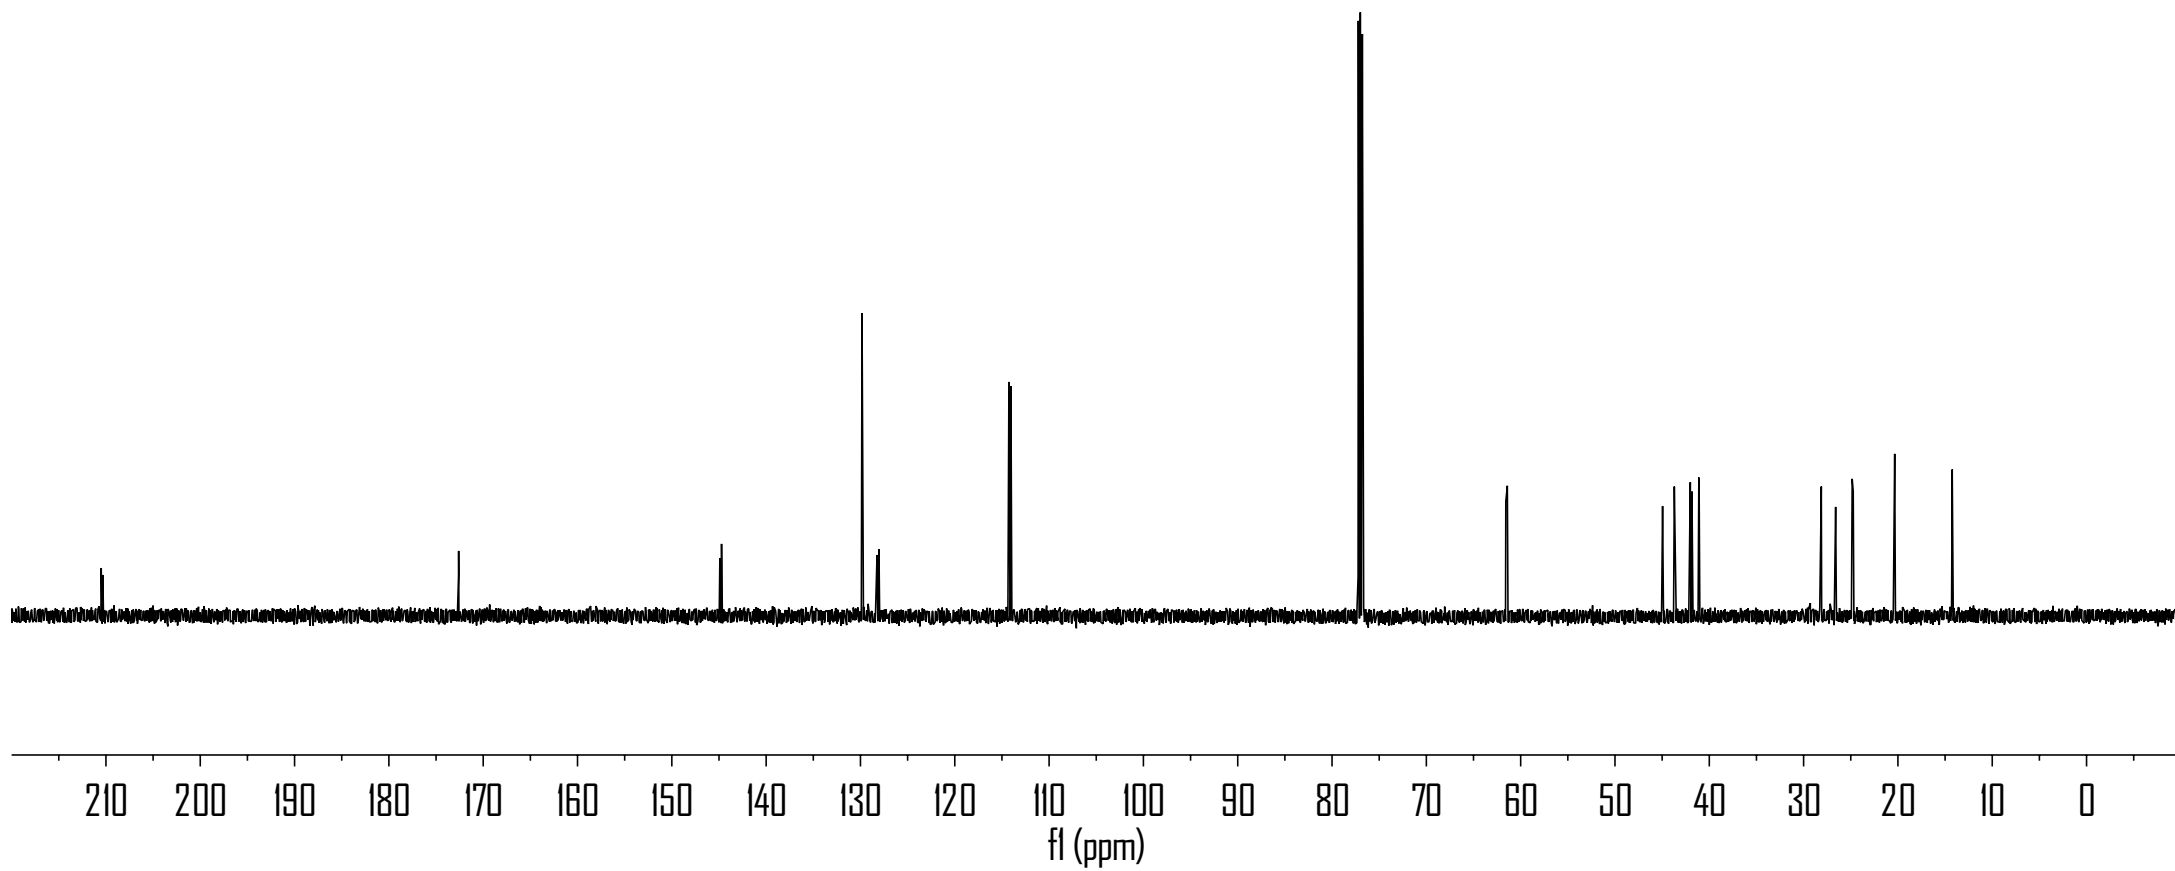

<sup>13</sup>C NMR (151 MHz, CDCl<sub>3</sub>)

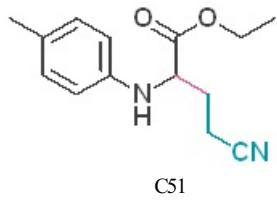

—172.63

—143.86

~129.90

~128.51

—118.91

—114.21

{77.21

{77.00

{76.79

—61.69

—55.83

~28.64

~20.34

~14.10

~13.63

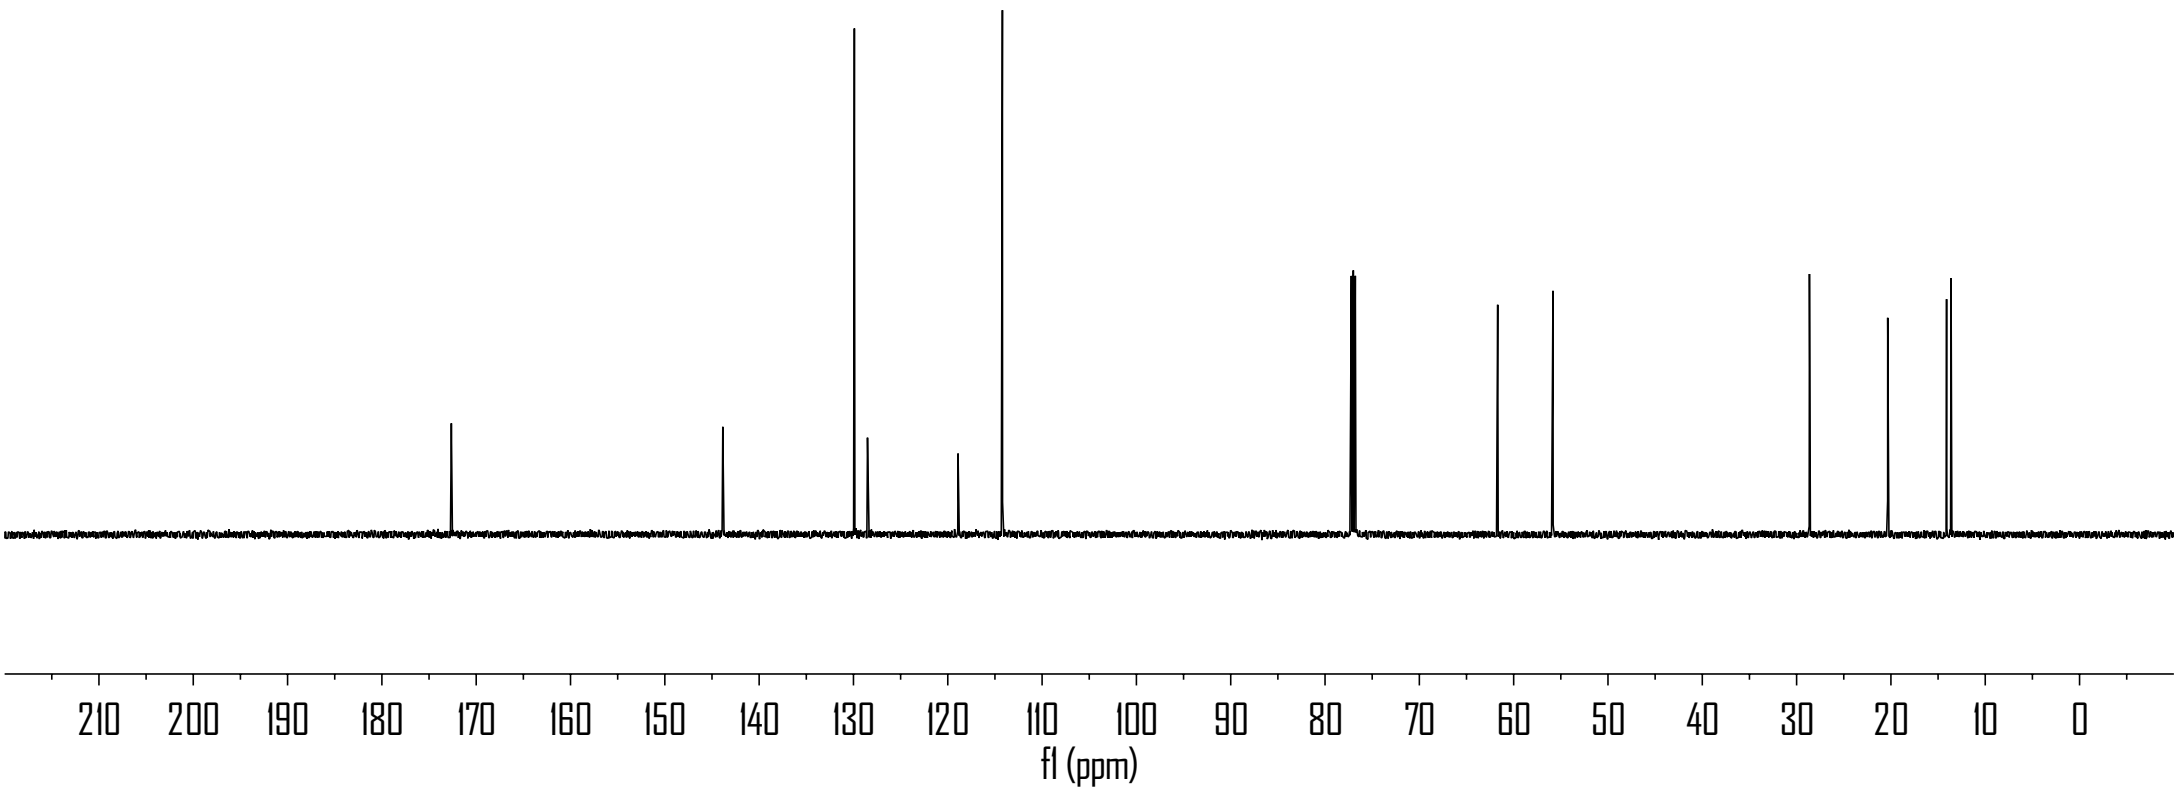

<sup>13</sup>C NMR (151 MHz, CDCl<sub>3</sub>)

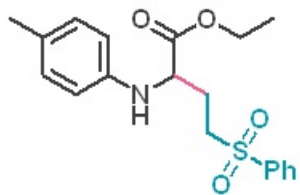

C52

— 172.75

143.89  
138.86  
133.81  
129.85  
129.35  
128.40  
127.99

— 114.11

77.21  
77.00  
76.79

— 61.60  
~ 55.65  
— 52.55

~ 26.01  
~ 20.35  
~ 14.12



<sup>13</sup>C NMR (151 MHz, CDCl<sub>3</sub>)

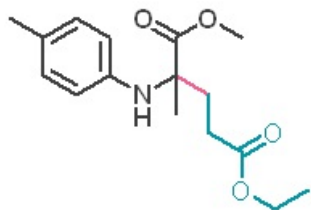

CS3

~175.98  
~173.20

—142.55

~129.58  
~128.19

—116.36

{77.21  
77.00  
76.79

{60.50  
60.29  
~52.48

~33.06  
~29.12  
~23.30  
~20.36  
~14.11

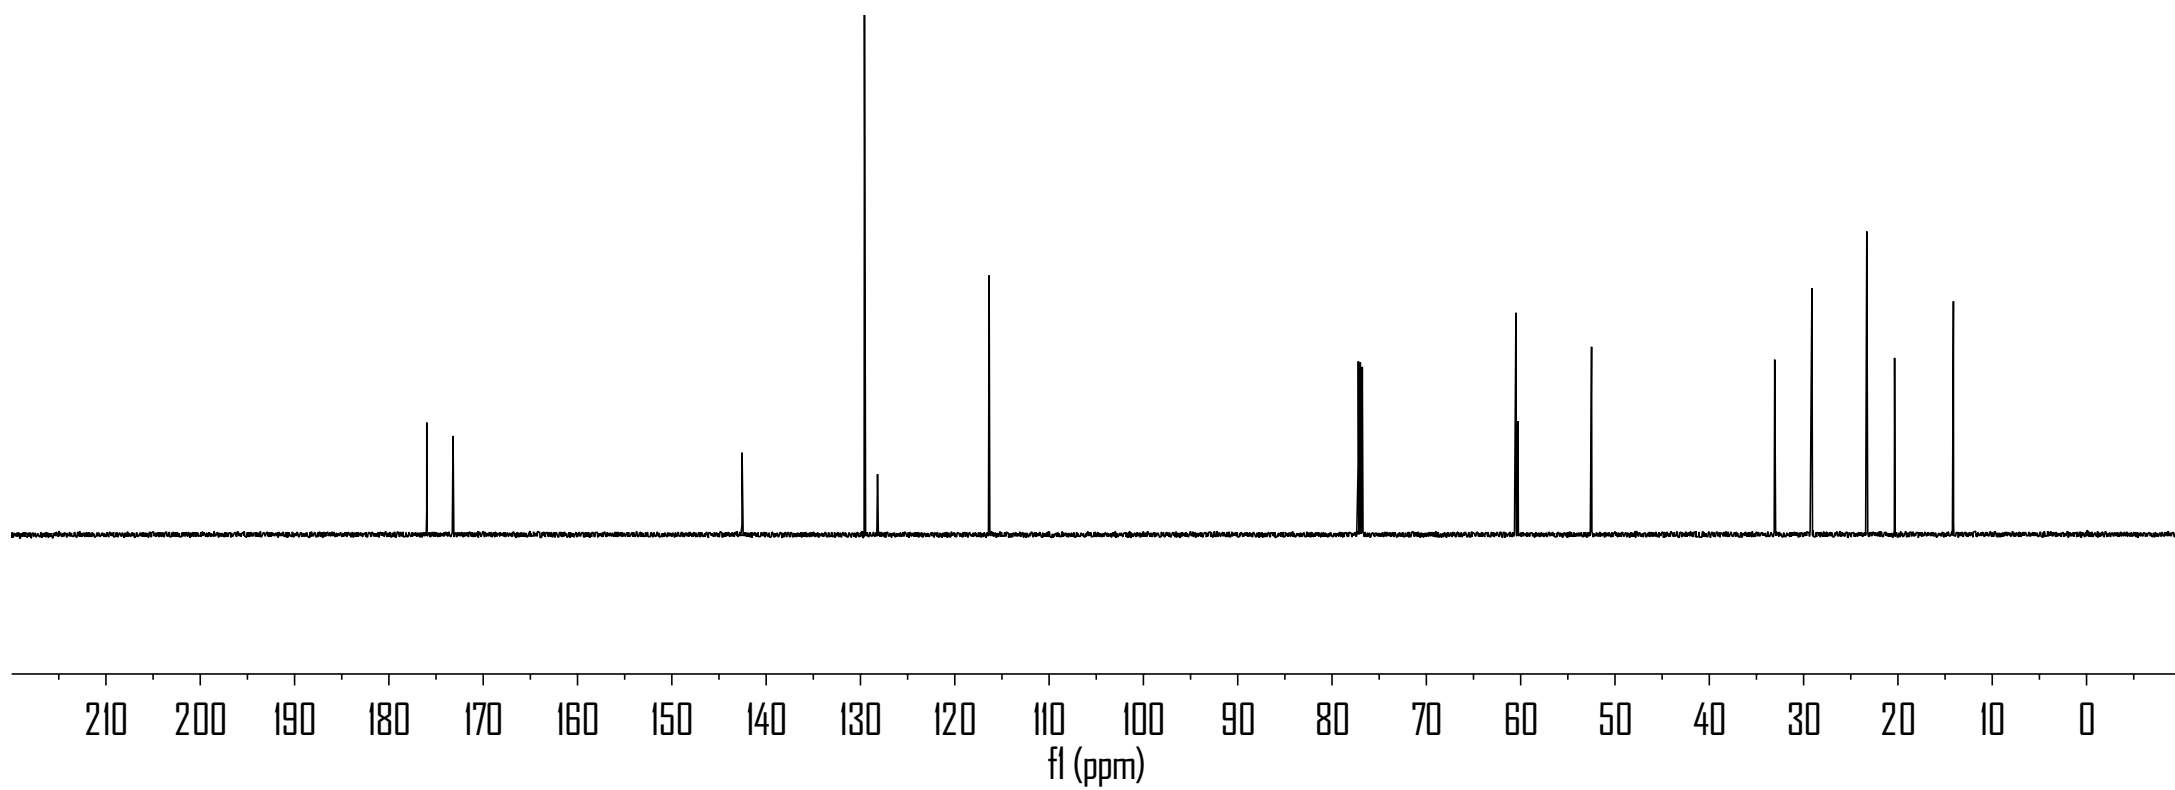

<sup>13</sup>C NMR (151 MHz, CDCl<sub>3</sub>)

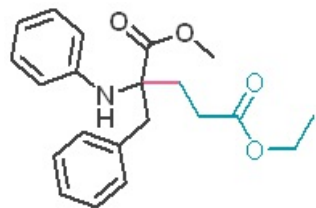

C54

~ 174.23  
~ 172.91

~ 144.75  
~ 135.83  
~ 129.96  
~ 129.40  
~ 128.06  
~ 126.85  
~ 117.81  
~ 114.77

{ 77.21  
77.00  
76.79

~ 64.98  
~ 60.47  
~ 52.56

~ 40.14  
~ 31.08  
~ 29.18

— 14.10

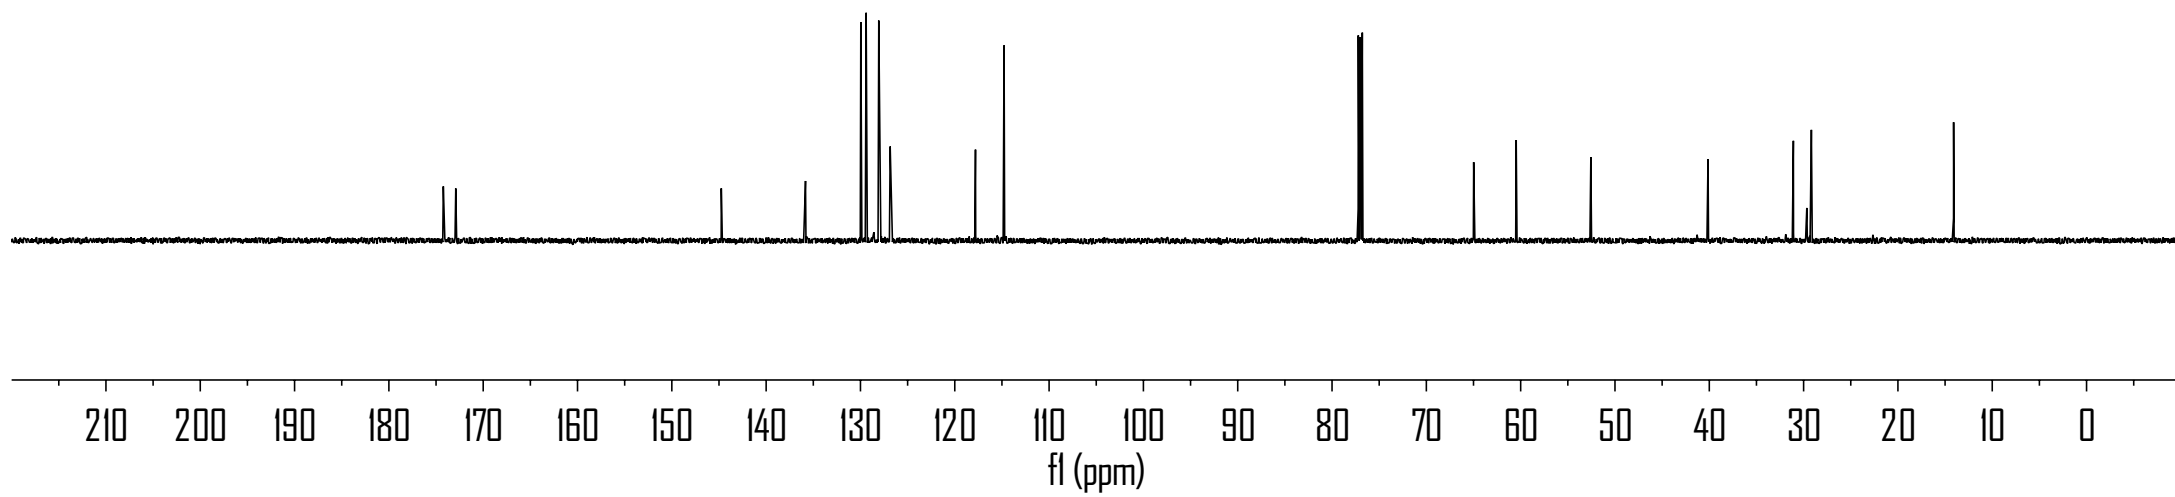

<sup>19</sup>F NMR (376 MHz, CDCl<sub>3</sub>)

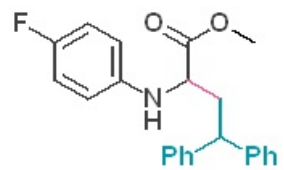

C4

--126.45

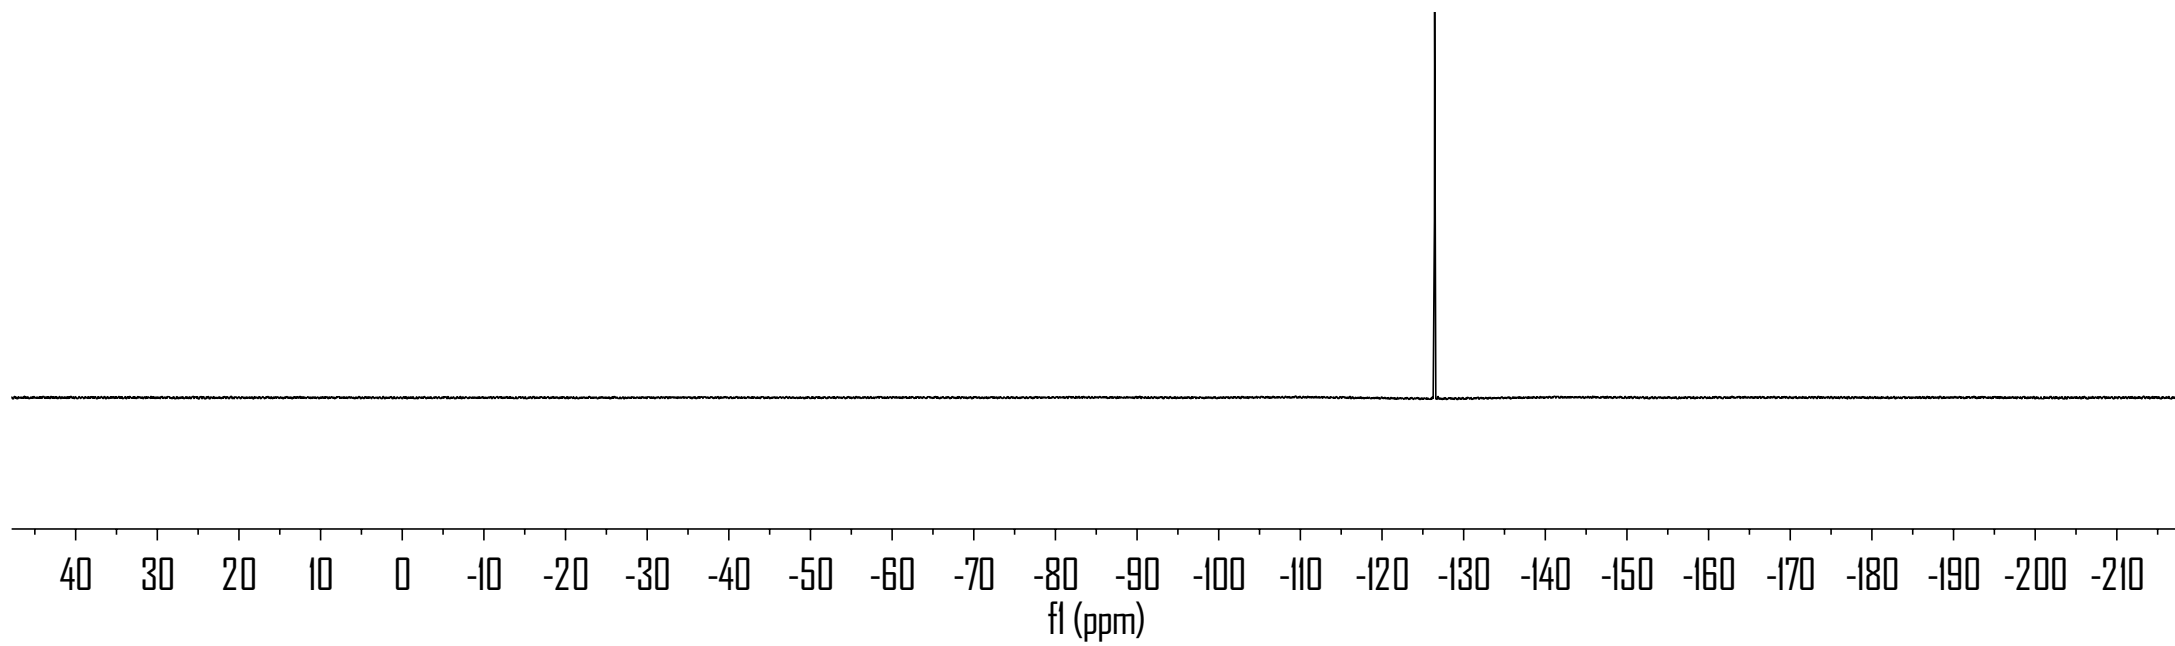

<sup>19</sup>F NMR (376 MHz, CDCl<sub>3</sub>)

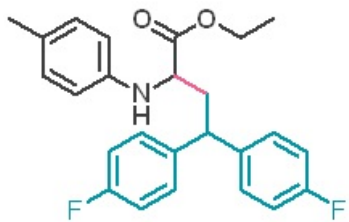

C28

-116.22  
-116.40

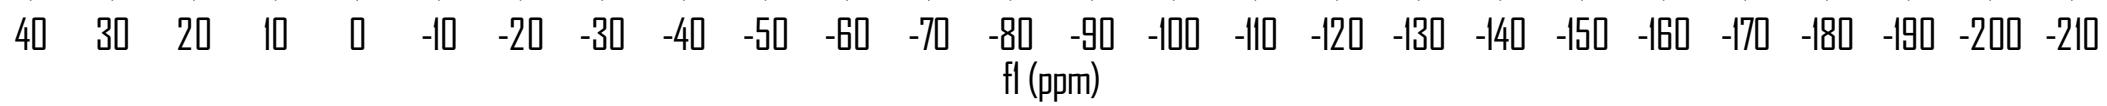



<sup>19</sup>F NMR (376 MHz, CDCl<sub>3</sub>)

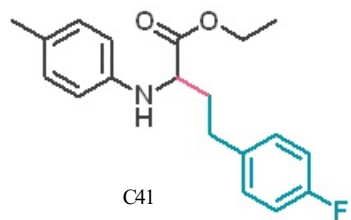

--117.25

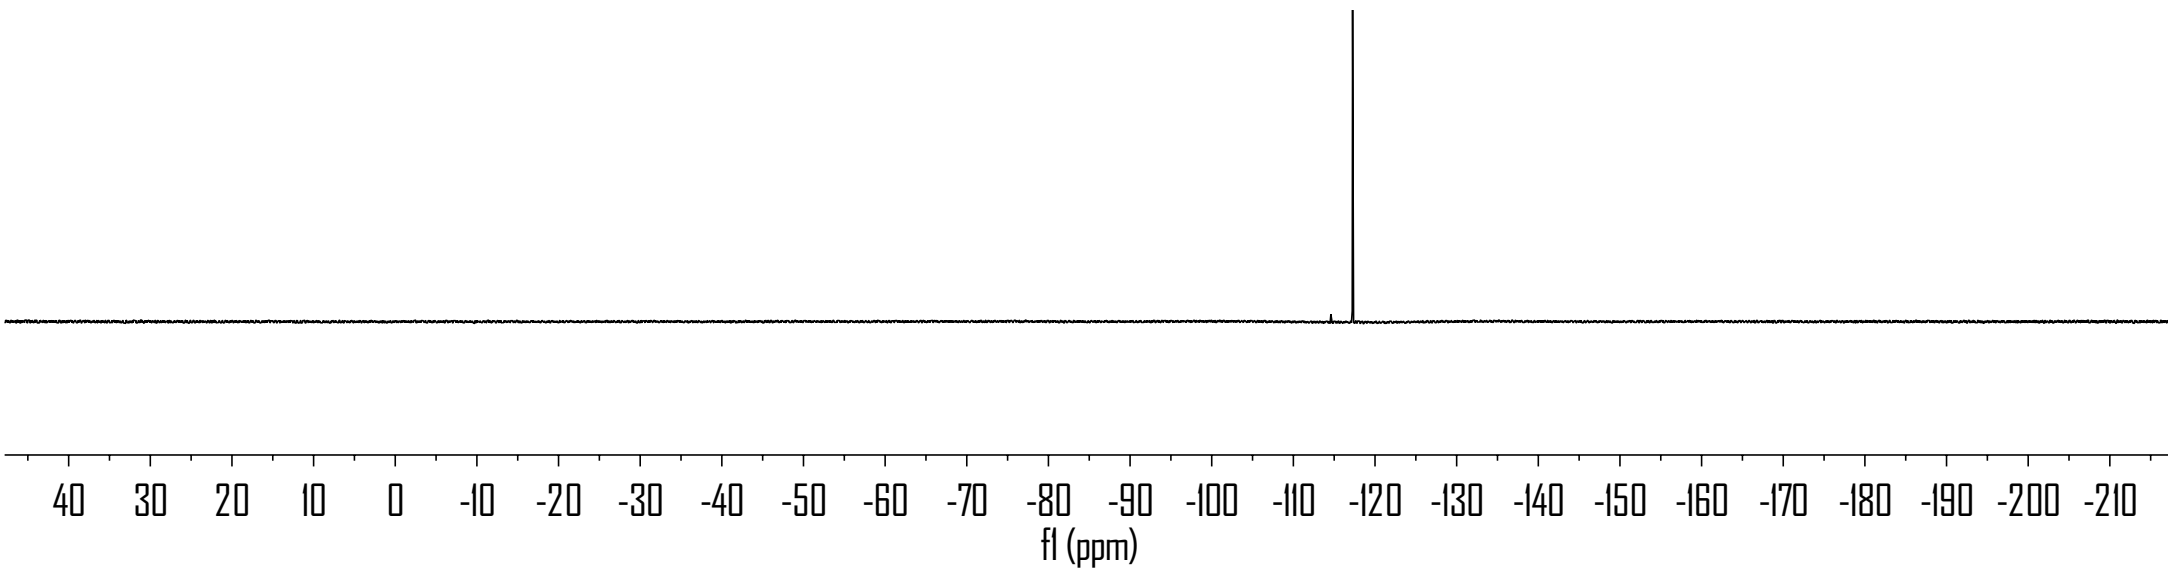

--62.3918

<sup>19</sup>F NMR (376 MHz, CDCl<sub>3</sub>)

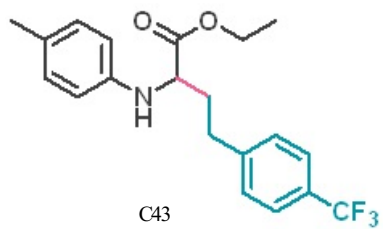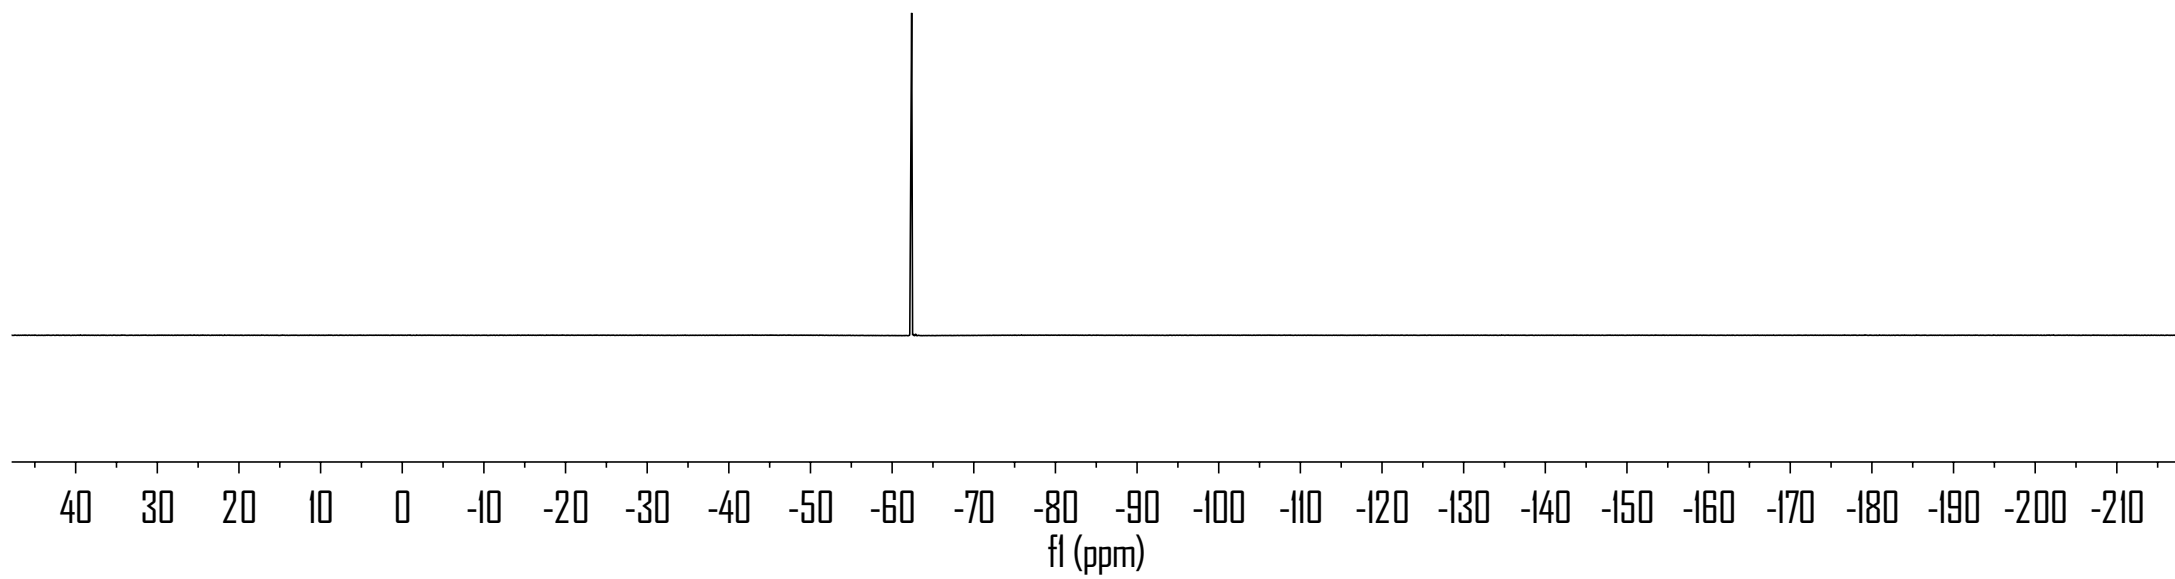



## HRMS spectra of key intermediates

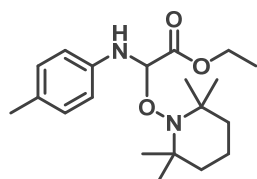

$C_{20}H_{33}N_2O_3^+$   
[M+H]<sup>+</sup> m/z 349.2486  
found 349.2488

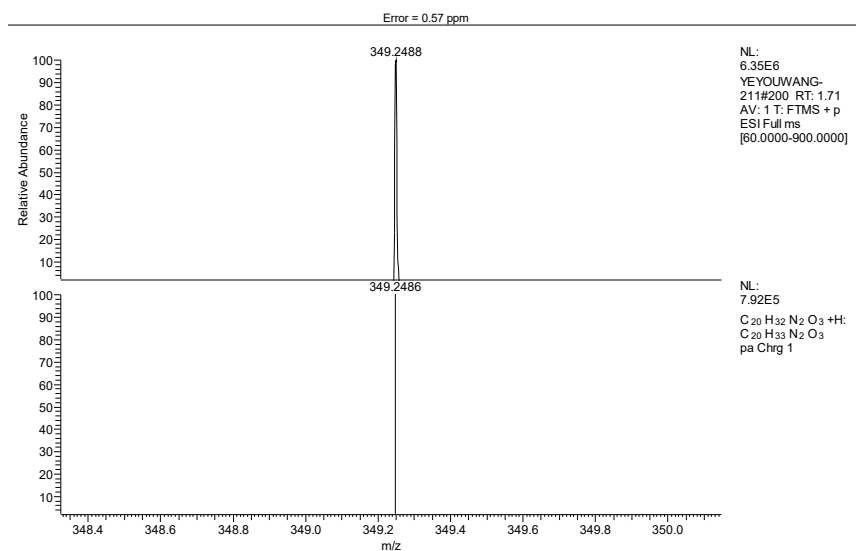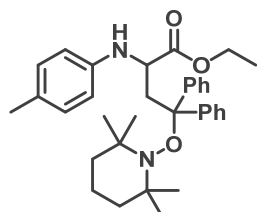

$C_{34}H_{45}N_2O_3^+$   
[M+H]<sup>+</sup> m/z 529.3425  
found 529.3426

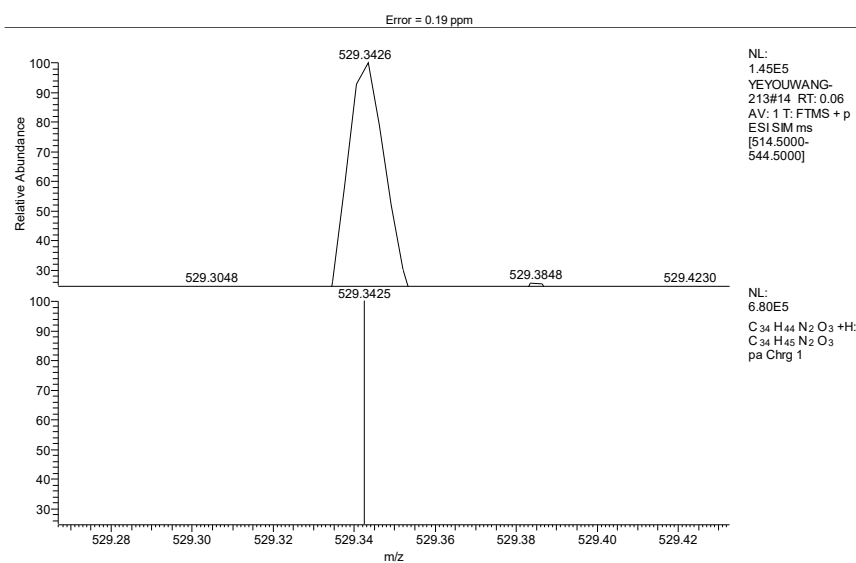

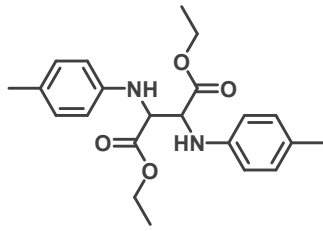

$C_{22}H_{29}N_2O_4^+$   
**[M+H]<sup>+</sup> m/z 385.2122**  
 found 385.2123

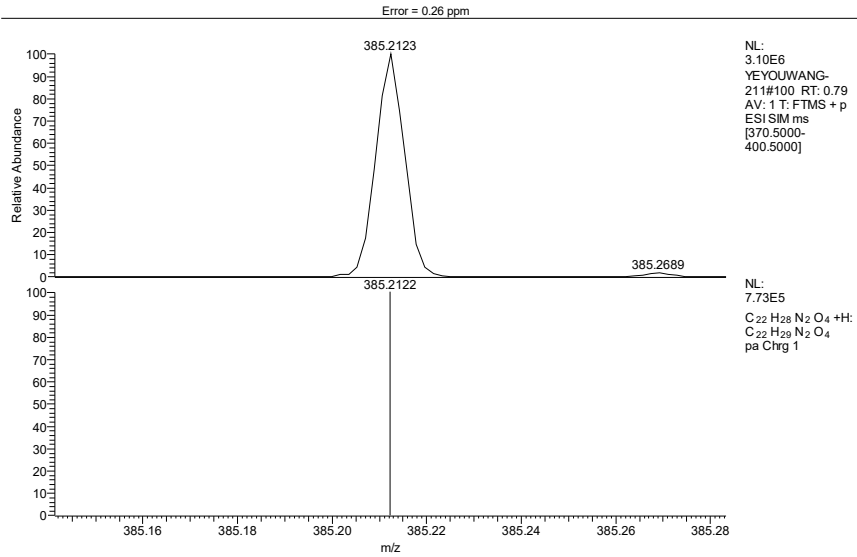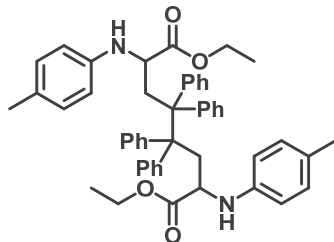

$C_{50}H_{53}N_2O_4^+$   
**[M+H]<sup>+</sup> m/z 745.4000**  
 found 745.4006

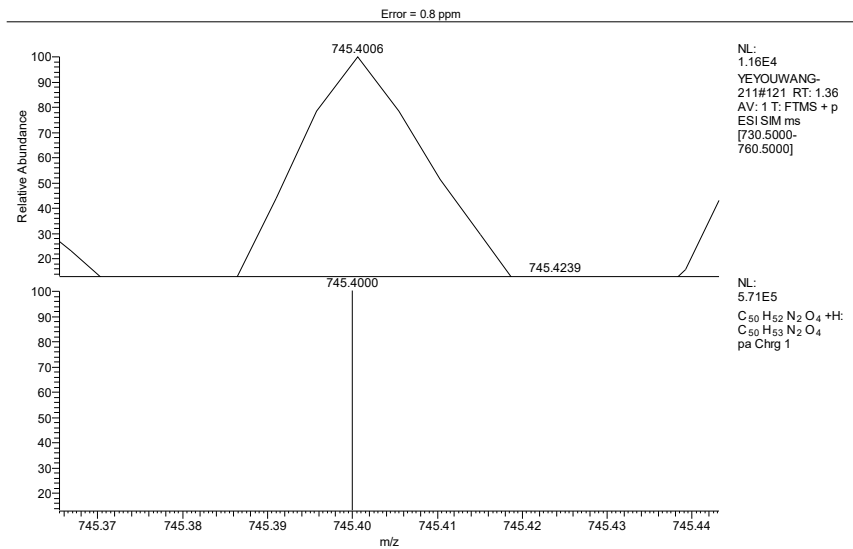

Supplement: d4cc02939a1.pdf [file d4cc02939a1.pdf]
